# Supplementary material for: A small protein encoded by a putative lncRNA regulates apoptosis and tumorigenicity in human colorectal cancer cells
Source: eLife journal article supplement (doi:10.7554/elife.53734), 2020-10-28
Supplement: supp [file elife-53734-supp-v1.zip]

A

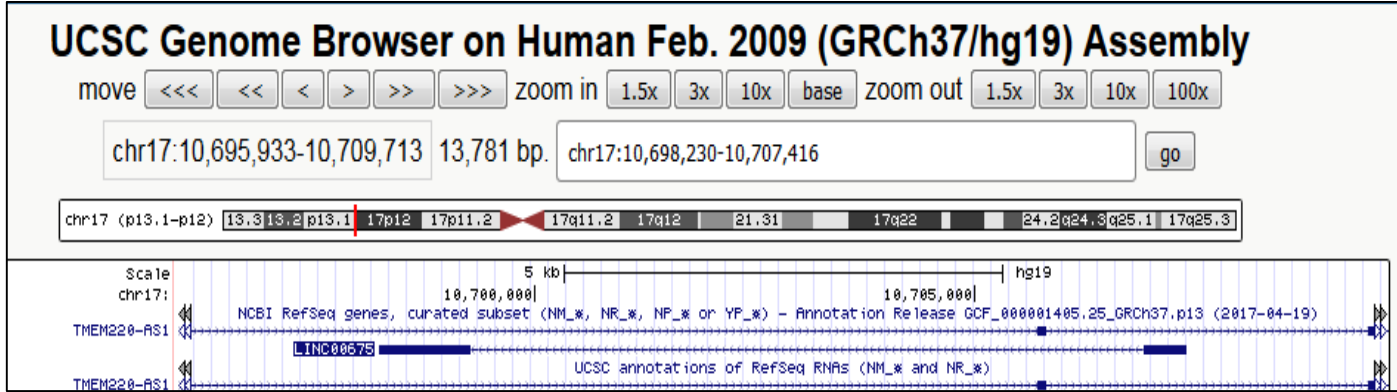

B

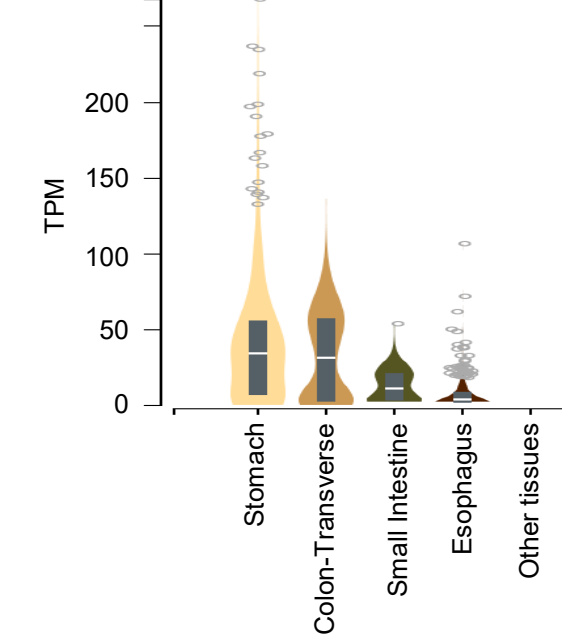

C

| Gene   | Median TPM (N=406) in Colon Transverse in GTEx Portal |
|--------|-------------------------------------------------------|
| FORCP  | 31.3                                                  |
| MALAT1 | 219.7                                                 |
| NORAD  | 95.03                                                 |

D

| Cell line | FPKM for FORCP ( <i>LINC00675</i> ) |
|-----------|-------------------------------------|
| HCT116    | 0.054                               |
| RKO       | 0.01                                |
| SW48      | 0.01                                |

E

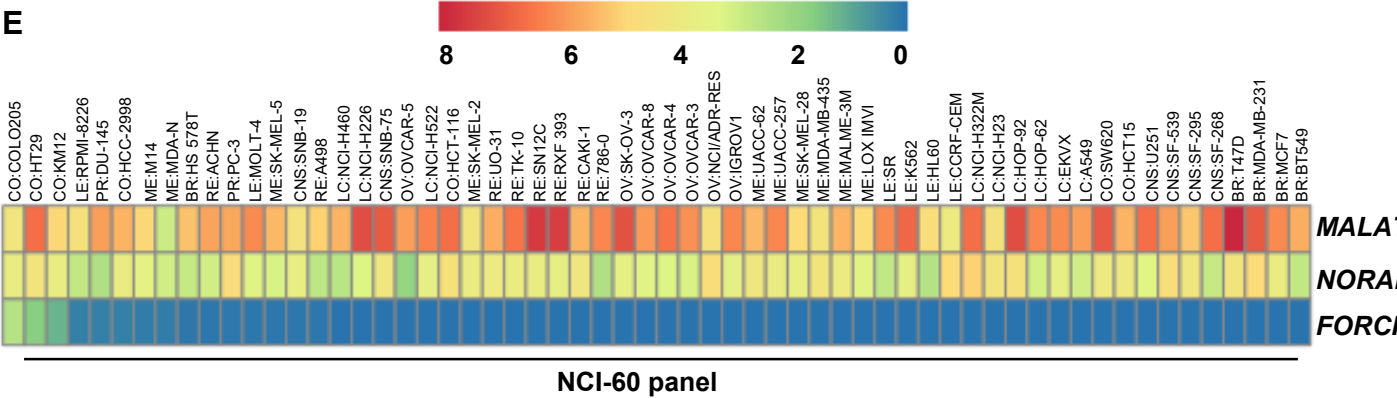

Figure 1-figure supplement 1.

(A) Snapshot of UCSC genome browser shows that *FORCP* (*LINC00675*) locus overlaps with the *TMEM220-AS1* intron transcribed from the opposite strand. (B) *FORCP* expression in RNA-seq across normal human tissues (data from GTExPortal). TPM refers to transcripts per kilobase million. (C) Expression of *FORCP*, *MALAT1* and *NORAD* in RNA-seq from normal human tissues (data from GTEx Portal). (D) Expression of *FORCP* in poorly differentiated CRC lines HCT116, RKO and SW48 is shown. See Supplementary file 2 for more details. FPKM refers to fragments per kilobase of exon model per million reads mapped. (E) Heat map showing the expression pattern of *FORCP* and the abundant lncRNAs *MALAT1* and *NORAD* in the NCI-60 panel of cell lines. See Supplementary file 1 for more details.
