# Supplementary material for: A small protein encoded by a putative lncRNA regulates apoptosis and tumorigenicity in human colorectal cancer cells
Source: eLife journal article supplement (doi:10.7554/elife.53734), 2020-10-28
Supplement: supp [file elife-53734-supp-v1.zip]

**A**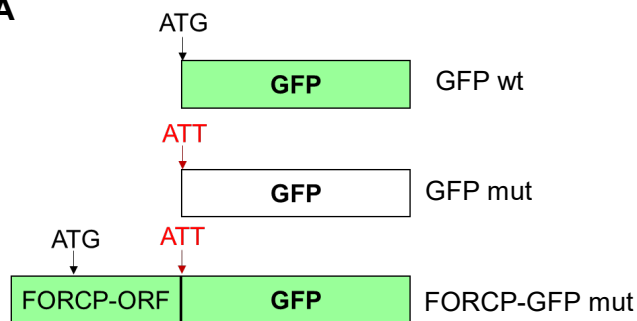**B**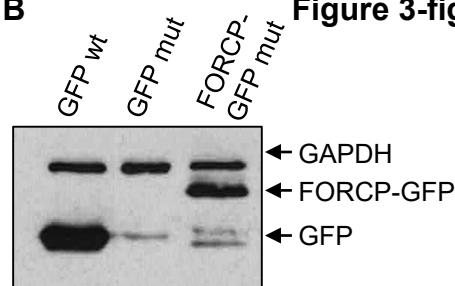**C**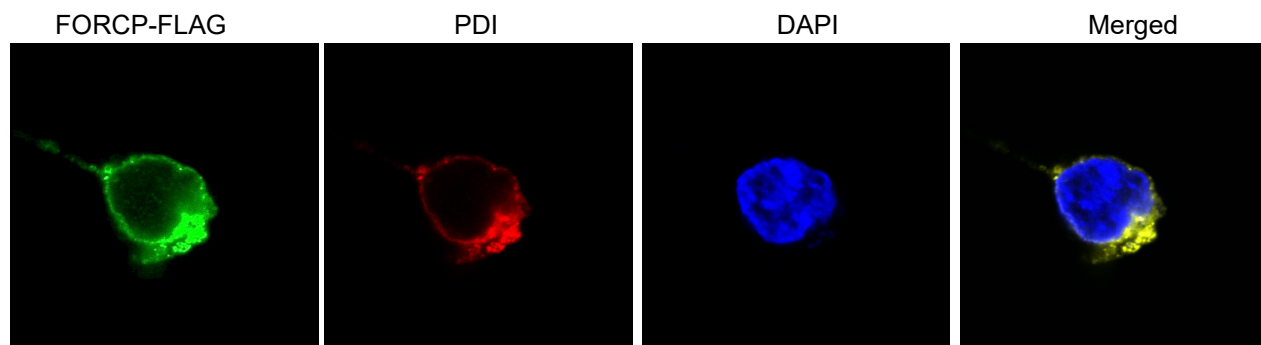**D**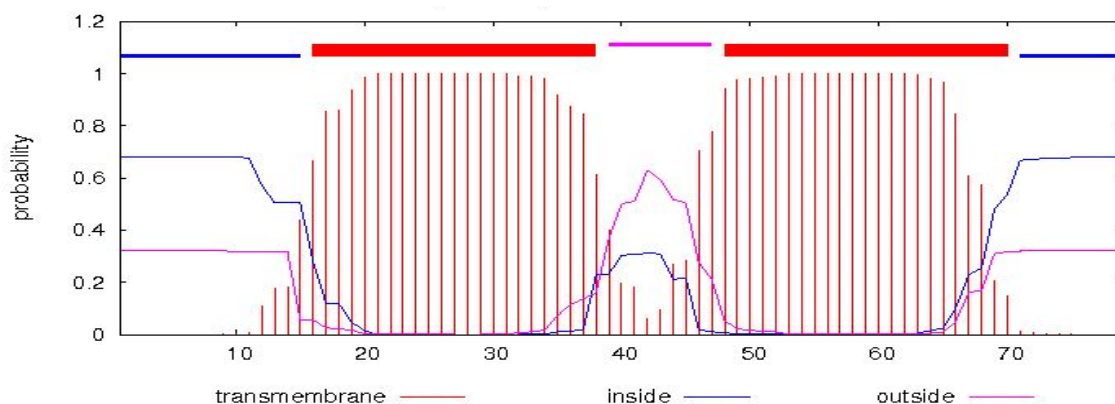**E**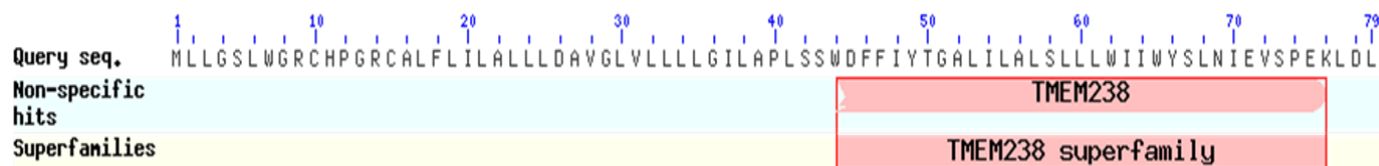**Figure 3-figure supplement 1.****(A)** GFP constructs used for confocal microscopy experiments to examine subcellular localization of FORCP protein.**(B)** Immunoblotting was performed using anti-GFP antibody shows robust expression of the FORCP-GFP and GFP protein upon transient transfection of GFP wt, GFP mut, or FORCP-GFP mut in 293T cells. GAPDH was used as loading control.**(C)** Confocal microscopy was performed following transfection of 293T cells with FORCP-FLAG and immunostaining for the ER marker PDI, using anti-FLAG or anti-PDI, respectively. DNA was counterstained with DAPI.**(D)** Predicted transmembrane domains in FORCP protein are shown.**(E)** The C-terminus of FORCP shows homology to TMEM238 superfamily.
