# Supplementary material for: A small protein encoded by a putative lncRNA regulates apoptosis and tumorigenicity in human colorectal cancer cells
Source: eLife journal article supplement (doi:10.7554/elife.53734), 2020-10-28
Supplement: supp [file elife-53734-supp-v1.zip]

A

|         | Poorly differentiated |       |     |      | Well-differentiated |       |       |
|---------|-----------------------|-------|-----|------|---------------------|-------|-------|
|         | HCT116                | SW480 | RKO | SW40 | SW1222              | LS180 | C80   |
| CEACAM5 | 0.0                   | 0.0   | 0.0 | 0.0  | 106.7               | 81.1  | 220.6 |
| CDX1    | 0.0                   | 0.0   | 0.0 | 0.0  | 110.9               | 97.5  | 200.1 |
| CDX2    | 4.8                   | 9.4   | 5.4 | 4.8  | 46.8                | 16.2  | 41.7  |
| KRT20   | 2.0                   | 0.3   | 0.0 | 1.5  | 154.5               | 2.8   | 155.4 |
| VIL1    | 0.0                   | 2.6   | 0.0 | 0.0  | 69.0                | 55.3  | 94.5  |

B

FPKM

>gi|305410872|ref|NR\_036581.1| Homo sapiens long intergenic non-protein coding RNA 675 (LINC00675), long non-coding RNA

GTGGCTCCAAGAAGCGCCAGCTCGCTCATTTGCTCACACCCAGCAGGCAGAGAAGGCAGCAGCAGGCAGGACCGCCACCCTCCCATGCAAATCA  
CCCCGGGAGTGCGAGCTGGGCTCCTCCCGCTCCTCCTGGGCAATGCTCCTGGGGAGTCTGTGGGGAAGATGCCATCCAGGGCGCTGTGCGCTC  
TTCCTCATCCTCGCCCTCCTGCTGGACGCGGTGCGCCTGGTCCTTTTGCTGCTGGGGATCTTGGCCCCCTGAGTTCCTGGGACTTCTTCATCTA  
CACAGGTGCCCTGATCCTGGCTCTCAGCCTACTGCTCTGGATCATCTGGTATTCCTCAACATTGAGGTGTCTCCTGAAAACTGGACCTGTAATT  
TGGCCATGGGAAGAGGAGAAGAGACGCAGGTGCTGTATGCAGACATGTCTGTGAACCTGGGGCTCTTGGGCAGCAACACGTTGCAGCTTCCACC  
TAGCAAGCCACGCCGGGACCAGGTCCCATCTGATGGAGGAGAATCAATTCAAGGAGATGCCCTTCCCTTACAGAACACCCTTTAACAGCATCCAG  
GAGGAACGAGAGGCTGCAATACTGAGGCTTTCAAAGTACTCACGAGGATGTCCGAGAATGGCTGTGATGCCAGGCTTCTGGCAGGTTCCAGACT  
CCATCACAAAGCCCAGCATCCCTGCACCAGATCTGACATCGCTGCTGTTGTGCCAGCTGTTTATGAAGGGCCTGAGTAGCTAGCAGGTTTTATCA  
GGAGCCCTGCTGGGGGCTTAGACACCAAAAGAGAAGACTCATCCTCTGTAGTTCTTCTTGTGAATGTCCTTTAGAAAAACAATTAGAACCAACCA  
CAAGCACCAAAGTCCTAATGGGATCTCCTGCGAGCACATATCAAGCAGGATTGTTGCTATTTCTCCTCACTGGCTCTTTGGACAGACTGTGTGAGC  
TCCTGGAGGGTTCCACTGTATCTACCCTTTGACACTGACCAGTTGGCACATGGTGACATATTCCAATGTGTTGATTGCAAATGTGAACGTACAGCC  
AGTGCTGTGTGCGGGAGGACTCTCTCCTCCTCAGTGGGGCCACACCGTGCATTAATGGAGCCCCACTCCTTTGCACAGCCTGGCCATGCAG  
TGGCTCATATTGAGGTTTTAGCCAACTGAAATCTCCCGTGCATTTTTCTGACAAGCCAGCTAGGCCTCTGCTATGCTGTCTTGTCTTTCAATTTG  
ATGACCTTAAGGGTGGGACTGTTTTATCTTAAGTTACAGGTGGTCAAGTCCAGCCCAAGGACAGCAACTCTGAGGGTCAAGCCTCATAGGCTAAC  
TGGATAGATGTTCTCTGCTTTGCCACCCACTGGAGCCCCGACCTGCCCCACTAATTTATATTTCCCTGGTCTCATTTTGTACTTTTTATTATAATTC  
ACCCTTAAAGTGATGTGTCTCTTATAAGCTGCCTCCGATCTTTCATGGTATGAGGTGGTTACCTAAATAAAGAAGGAGATTGGCCTTTGTTTTTA  
TGTA

Figure 1-figure supplement 2.

(A) RNA-seq was used to determine the expression of specific pro-differentiation genes in poorly differentiated CRC lines (green) vs well-differentiated CRC lines (blue). See Supplementary file 2 for more details.  
(B) Sequence of *FORCP* transcript annotated as *LINC00675* by Refseq is shown. Polyadenylation signal (AATAAA) is shown in red near the 3'end of the transcript.
