# Supplementary material for: A small protein encoded by a putative lncRNA regulates apoptosis and tumorigenicity in human colorectal cancer cells
Source: eLife journal article supplement (doi:10.7554/elife.53734), 2020-10-28
Supplement: supp [file elife-53734-supp-v1.zip]

**A**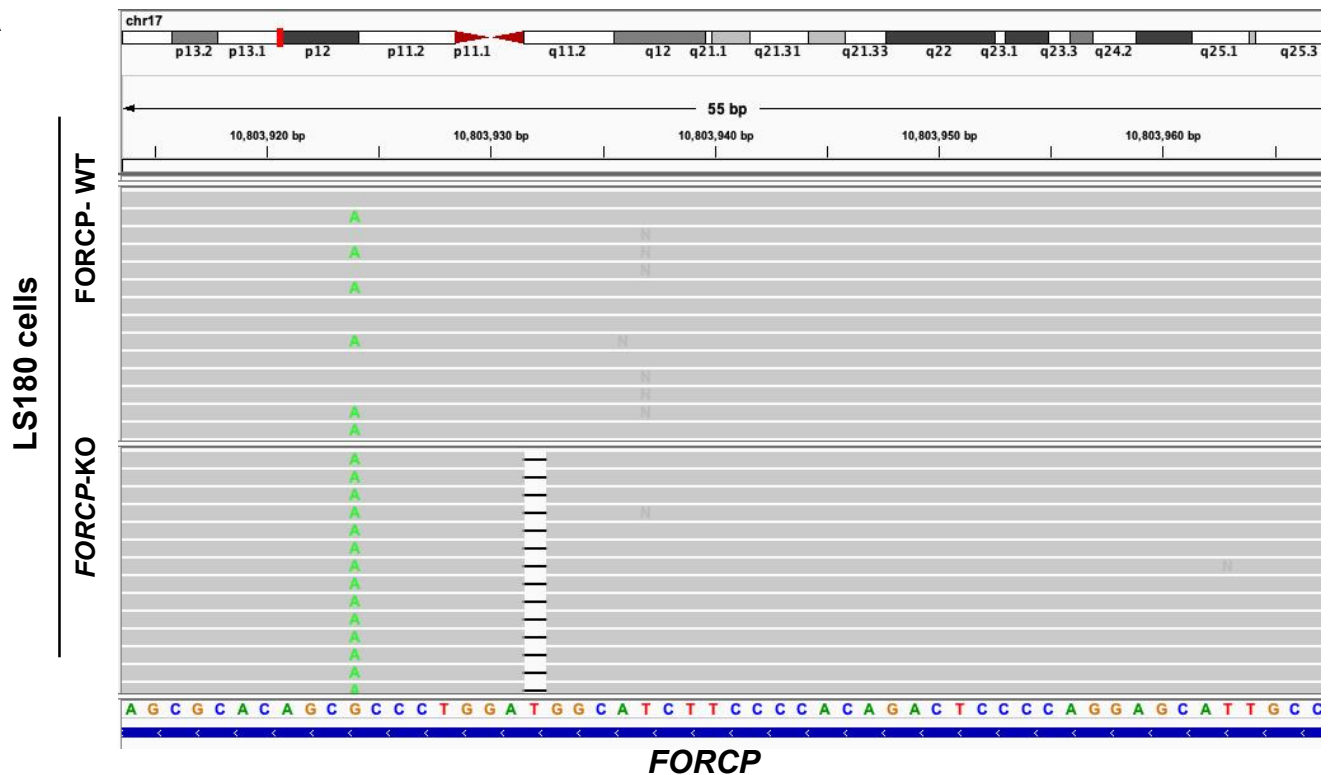**B**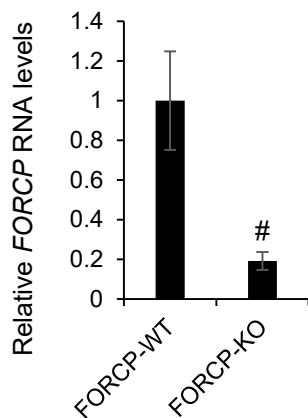**C**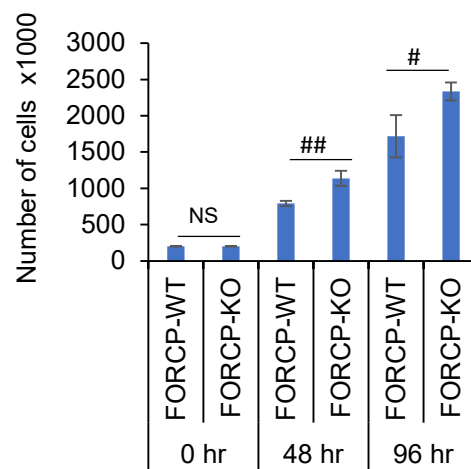**D**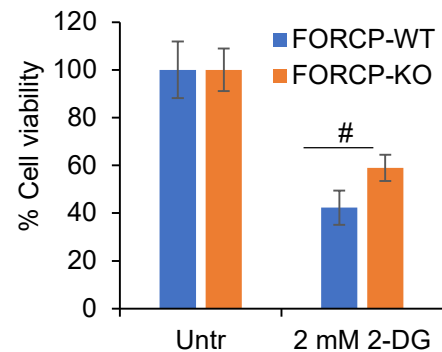**Figure 4-figure supplement 3.**

**(A)** IGV visualization of targeted amplicon sequencing data from *FORCP* wild type (WT) and isogenic *FORCP*-KO (knockout) LS180 cells. In the *FORCP*-KO cells, a 1 bp deletion is observed in one of the alleles within the sgRNA target site while it is likely a large deletion was generated in the other allele which had removed the PCR primer binding sites. **(B)** qRT-qPCR was performed from *FORCP*-WT and *FORCP*-KO LS180 cells. *GAPDH* was to normalize the data. # $p < 0.005$ , ## $p < 0.001$ . **(C)** *FORCP*-WT cells and *FORCP*-KO cells were seeded in 6-well plates and trypan blue exclusion cell count assays were performed at the time of seeding (0 hr) and after growing the cells for 48 and 96 hr, respectively. **(D)** Cell viability assays were performed from *FORCP*-WT and *FORCP*-KO LS180 cells that were left untreated or treated with 2-DG to inhibit glycolysis. Error bars represent SD from 3 experiments. # $p < 0.01$ , ## $p < 0.001$ .
