# Supplementary material for: A small protein encoded by a putative lncRNA regulates apoptosis and tumorigenicity in human colorectal cancer cells
Source: eLife journal article supplement (doi:10.7554/elife.53734), 2020-10-28
Supplement: supp [file elife-53734-supp-v1.zip]

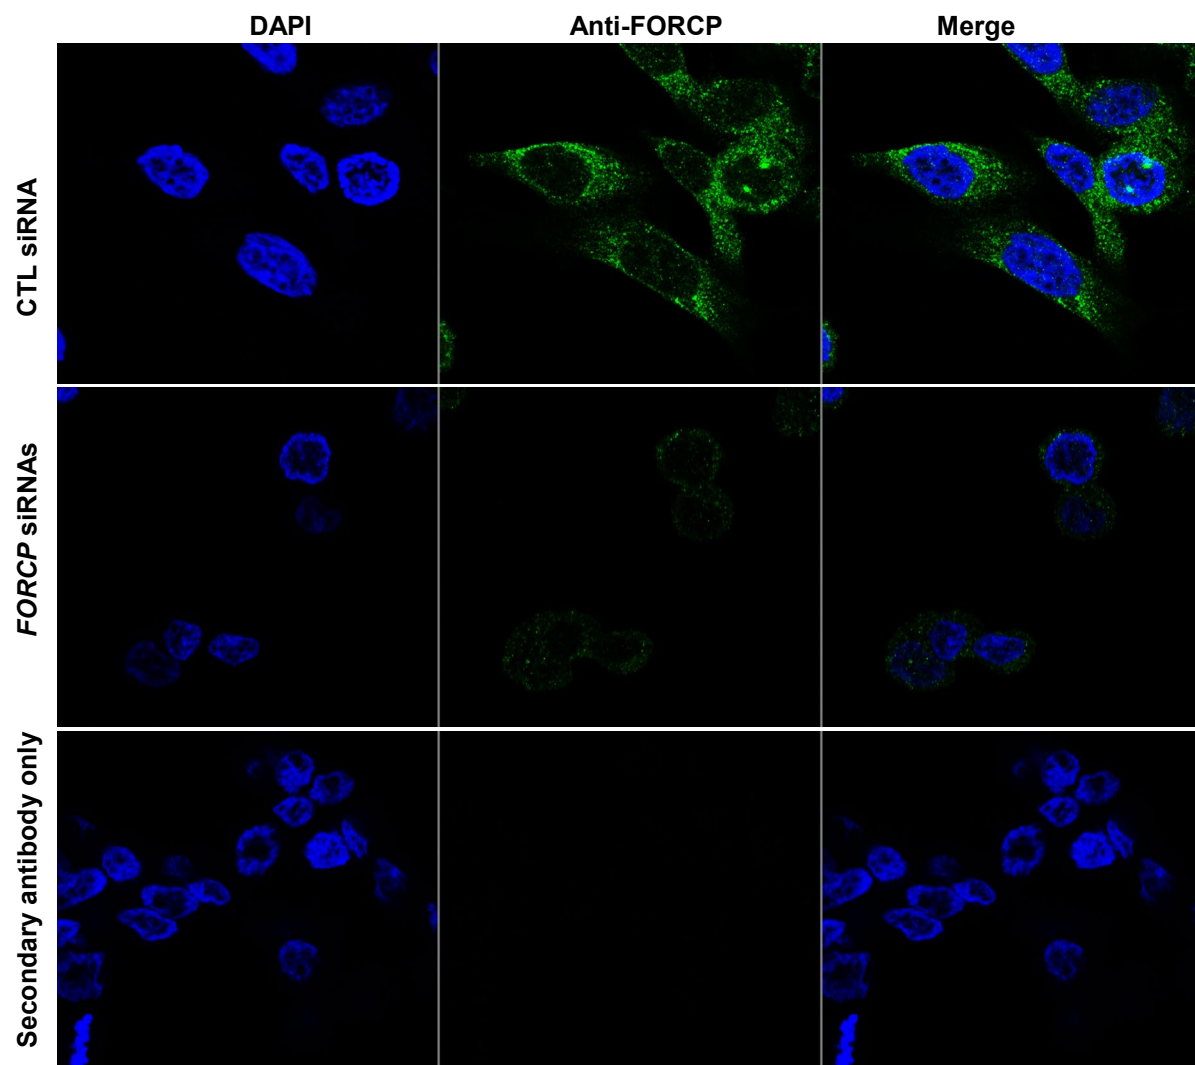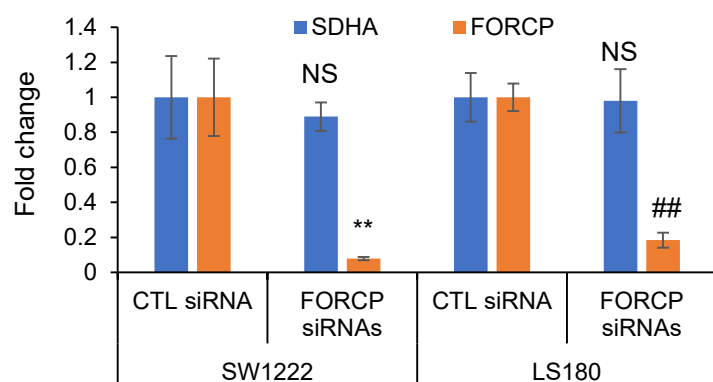

**Figure 3-figure supplement 2.**

**(A)** Immunostaining was performed for endogenous FORCP using the anti-FORCP antibody 48 hr after transfection of LS180 cells with CTL siRNA or *FORCP* siRNAs. DNA was stained with DAPI. Secondary antibody alone was used as negative control.

**(B)** *FORCP* knockdown using smartpool siRNAs was assessed by qRT-PCR 48 hr after transfection of SW1222 and LS180 cells with CTL siRNA or *FORCP* siRNAs. Housekeeping gene *SDHA* was used as negative control. Data was normalized to *GAPDH*. Error bars represent SD from 3 experiments. \*\* $p < 0.005$ , ## $p < 0.001$ .
