# Supplementary material for: A small protein encoded by a putative lncRNA regulates apoptosis and tumorigenicity in human colorectal cancer cells
Source: eLife journal article supplement (doi:10.7554/elife.53734), 2020-10-28
Supplement: supp [file elife-53734-supp-v1.zip]

**A**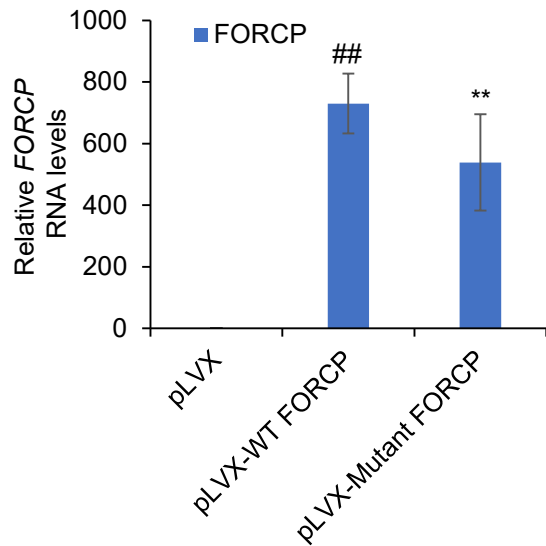**B**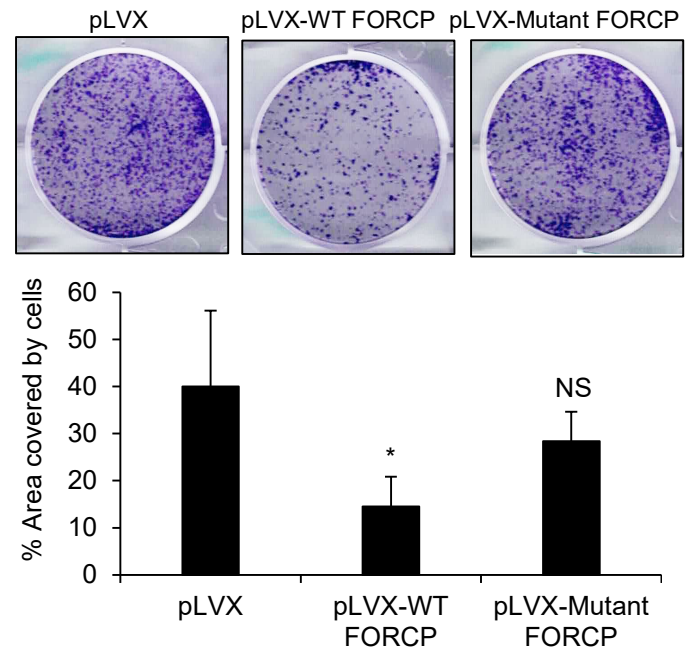**C**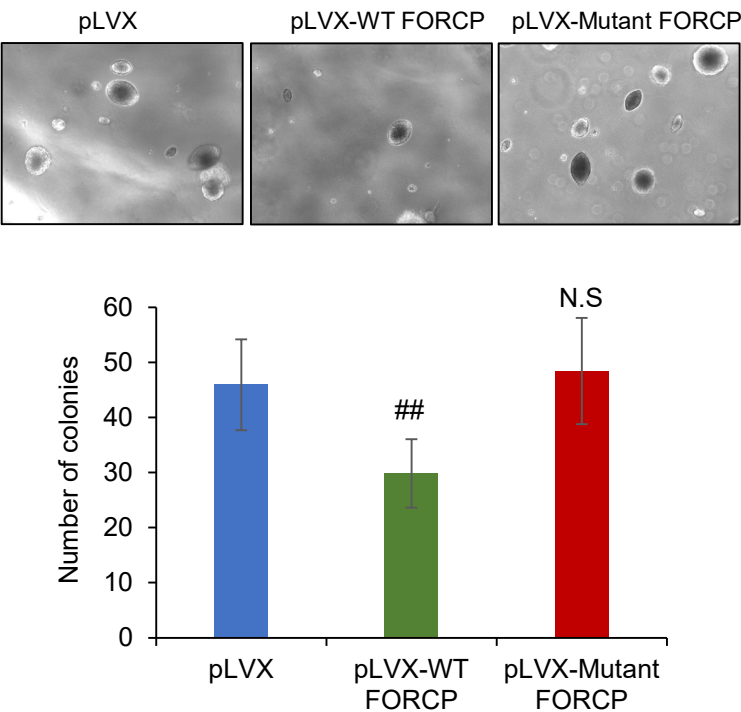**Figure 2-figure supplement 3.**

(A) qRT-PCR analysis shows *FORCP* RNA overexpression upon stable transduction of 293T cells with WT- or Mutant-*FORCP*. pLVX is the empty vector. (B, C) Colony formation assays on plastic (B) and soft agar colony formation assays (C) were performed following overexpression of WT *FORCP* or Mutant *FORCP* in HCT116 cells. Error bars represent SD from 3 experiments. \* $p < 0.05$ , \*\* $p < 0.005$ , ### $p < 0.001$ .
