# Supplementary material for: A small protein encoded by a putative lncRNA regulates apoptosis and tumorigenicity in human colorectal cancer cells
Source: eLife journal article supplement (doi:10.7554/elife.53734), 2020-10-28
Supplement: supp [file elife-53734-supp-v1.zip]

**A**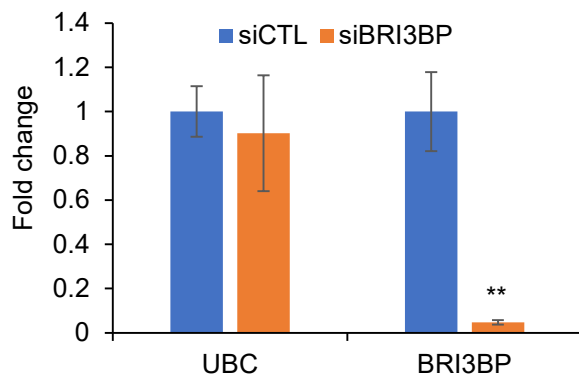**B**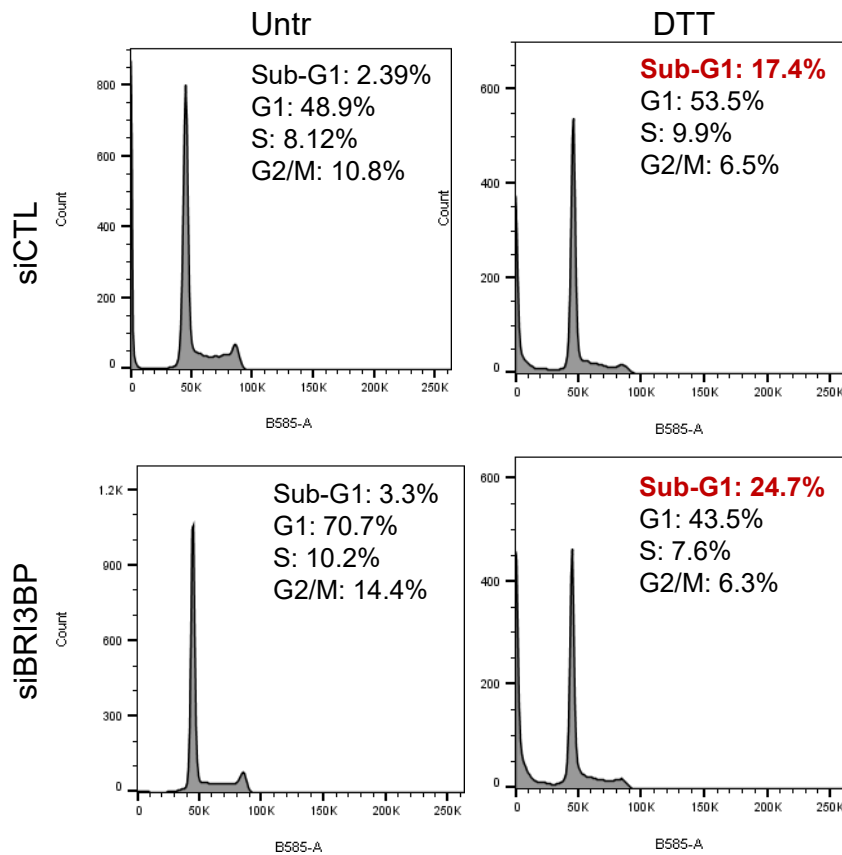**Figure 4-figure supplement 4.**

**(A)** qRT-qPCR was performed from LS180 cells transfected for 48 hr with control siRNAs (siCTL) or BRI3BP siRNAs Smartpool (siBRI3BP). *GAPDH* was to normalize the data and UBC was used as negative control. **(B)** PI staining and FACS analysis was performed from LS180 cells transfected for 48 hr with control siRNAs (siCTL) or BRI3BP siRNAs and then treated with DTT for 2 hr. Error bars represent SD from 3 experiments. \*\*p<0.005.
