# Supplementary material for: A small protein encoded by a putative lncRNA regulates apoptosis and tumorigenicity in human colorectal cancer cells
Source: eLife journal article supplement (doi:10.7554/elife.53734), 2020-10-28
Supplement: supp [file elife-53734-supp-v1.zip]

**A****SW1222**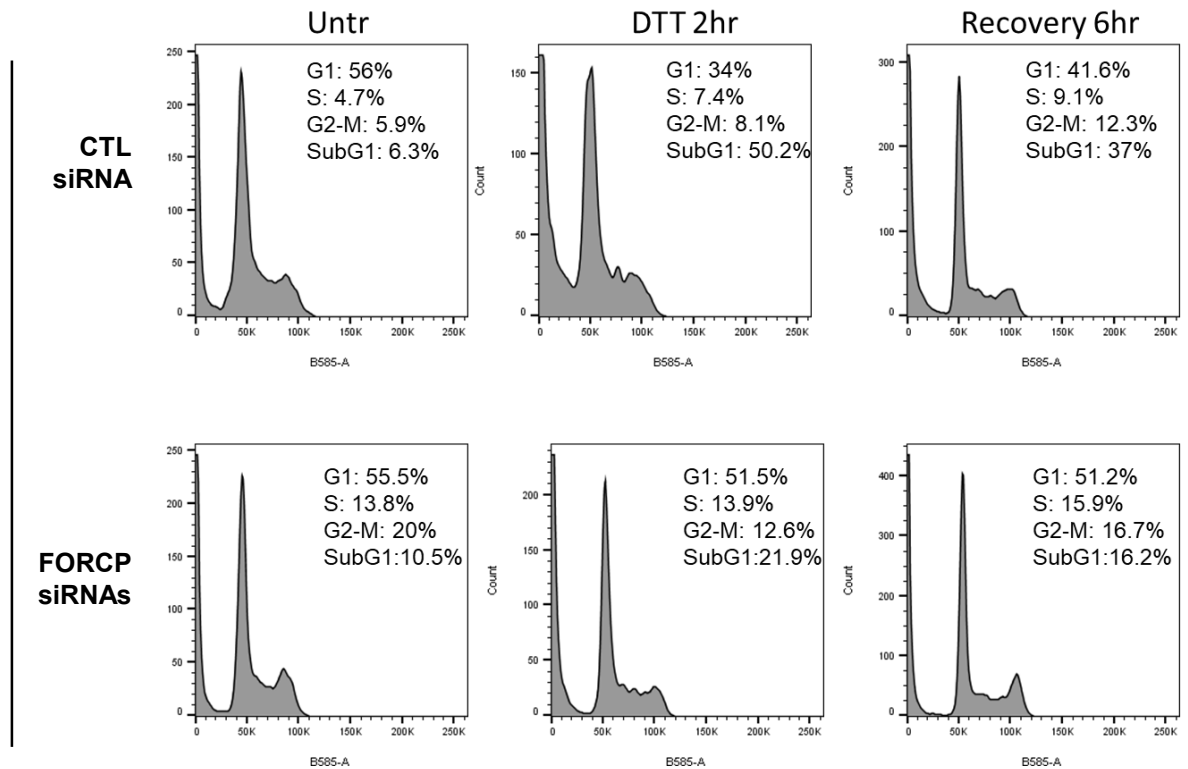**B**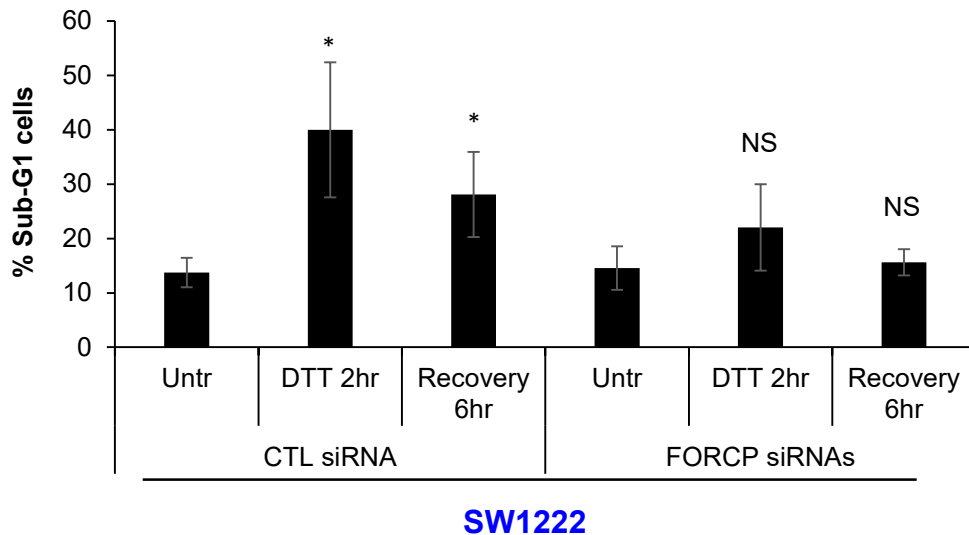**Figure 4-figure supplement 2.**

(A-B) PI staining and FACS analysis was performed from SW1222 cells transfected for 48 hr with CTL siRNA or *FORCP* siRNAs and then left untreated or treated with DTT for 2 hr or after 6 hr recovery from DTT treatment (A). The Sub-G1 population from 3 independent experiments in panel A, is shown. \*p<0.05. NS refers to not significant.
