# Supplementary material for: A small protein encoded by a putative lncRNA regulates apoptosis and tumorigenicity in human colorectal cancer cells
Source: eLife journal article supplement (doi:10.7554/elife.53734), 2020-10-28
Supplement: supp [file elife-53734-supp-v1.zip]

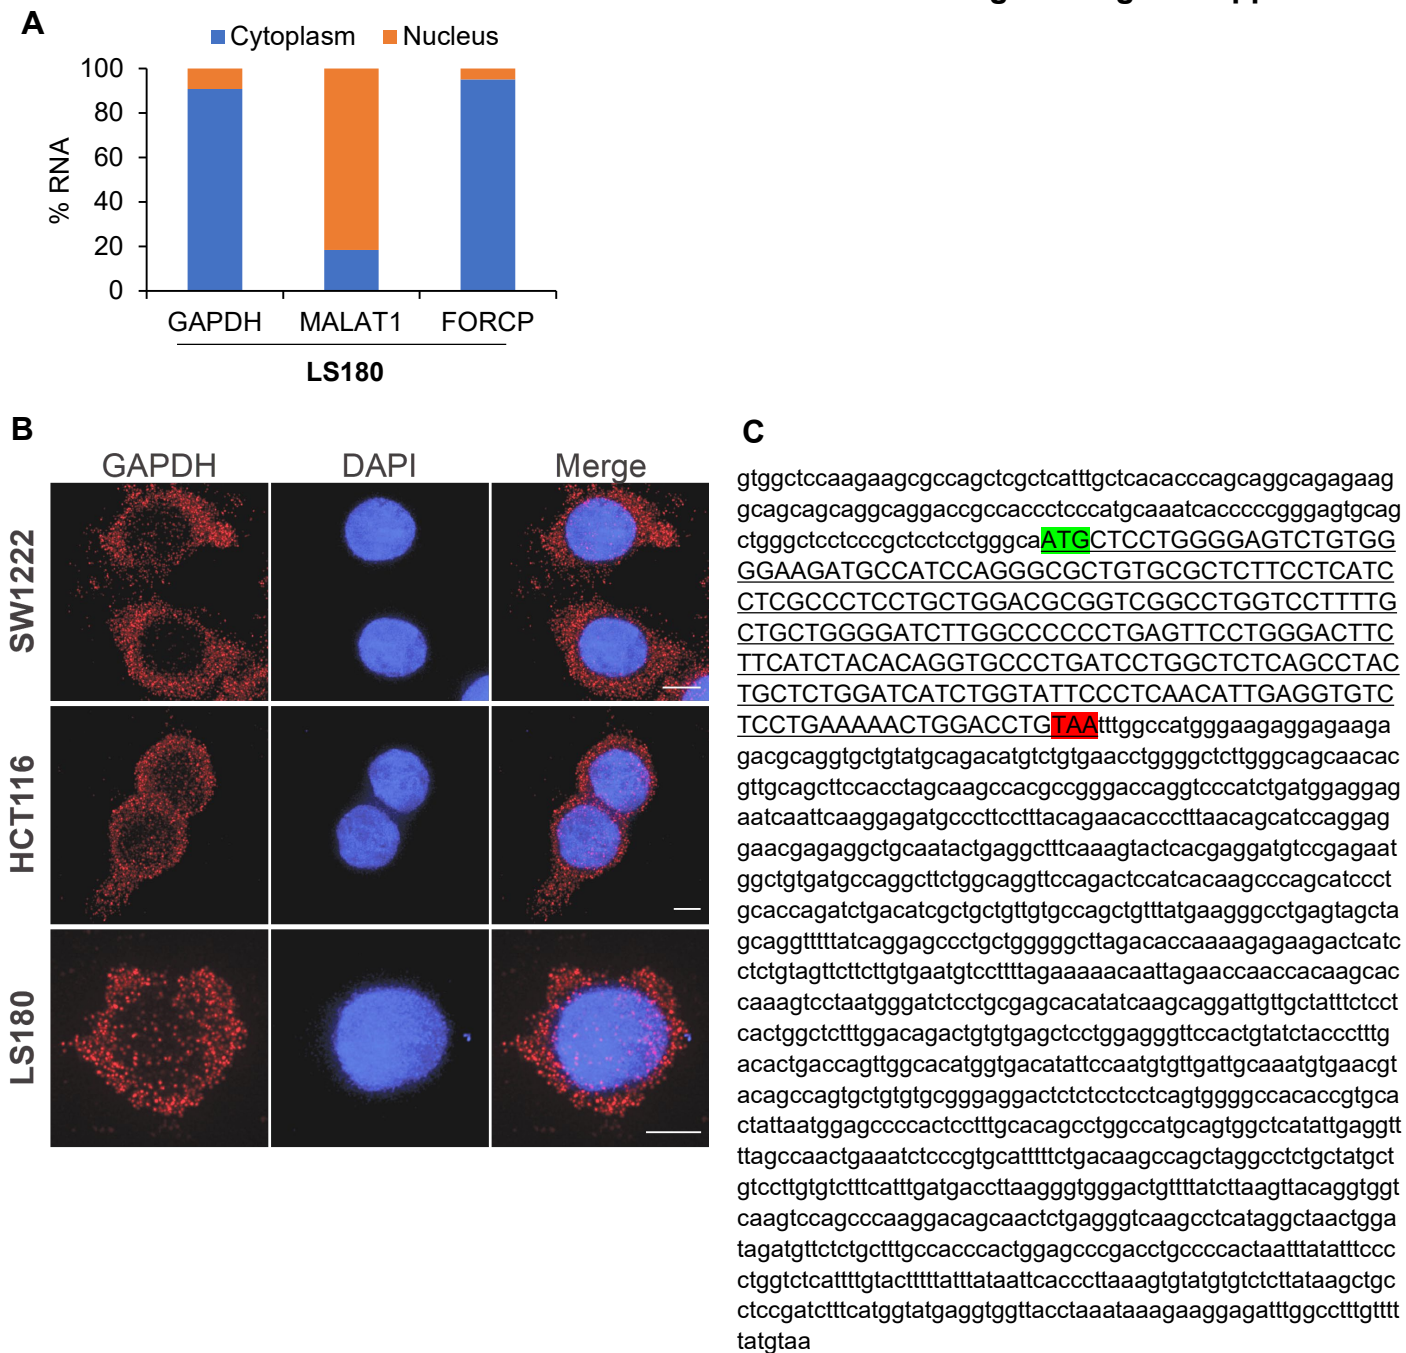

Figure 2-figure supplement 1.

(A) qRT-PCR analysis was performed for *FORCP*, *GAPDH* (positive control for cytoplasmic RNA) and *MALAT1* (positive control for nuclear RNA) from nuclear or cytoplasmic fractions of LS180 cells. (B) Single molecule RNA-FISH was performed for *GAPDH* from SW1222, LS180 and HCT116 cells. DNA was counterstained with DAPI. (C) Sequence of human *FORCP* transcript and the 240 nt ORF (underlined sequence in upper case) with the start codon (green) and stop codon (red) is shown.
