# Supplementary material for: A small protein encoded by a putative lncRNA regulates apoptosis and tumorigenicity in human colorectal cancer cells
Source: eLife journal article supplement (doi:10.7554/elife.53734), 2020-10-28
Supplement: supp [file elife-53734-supp-v1.zip]

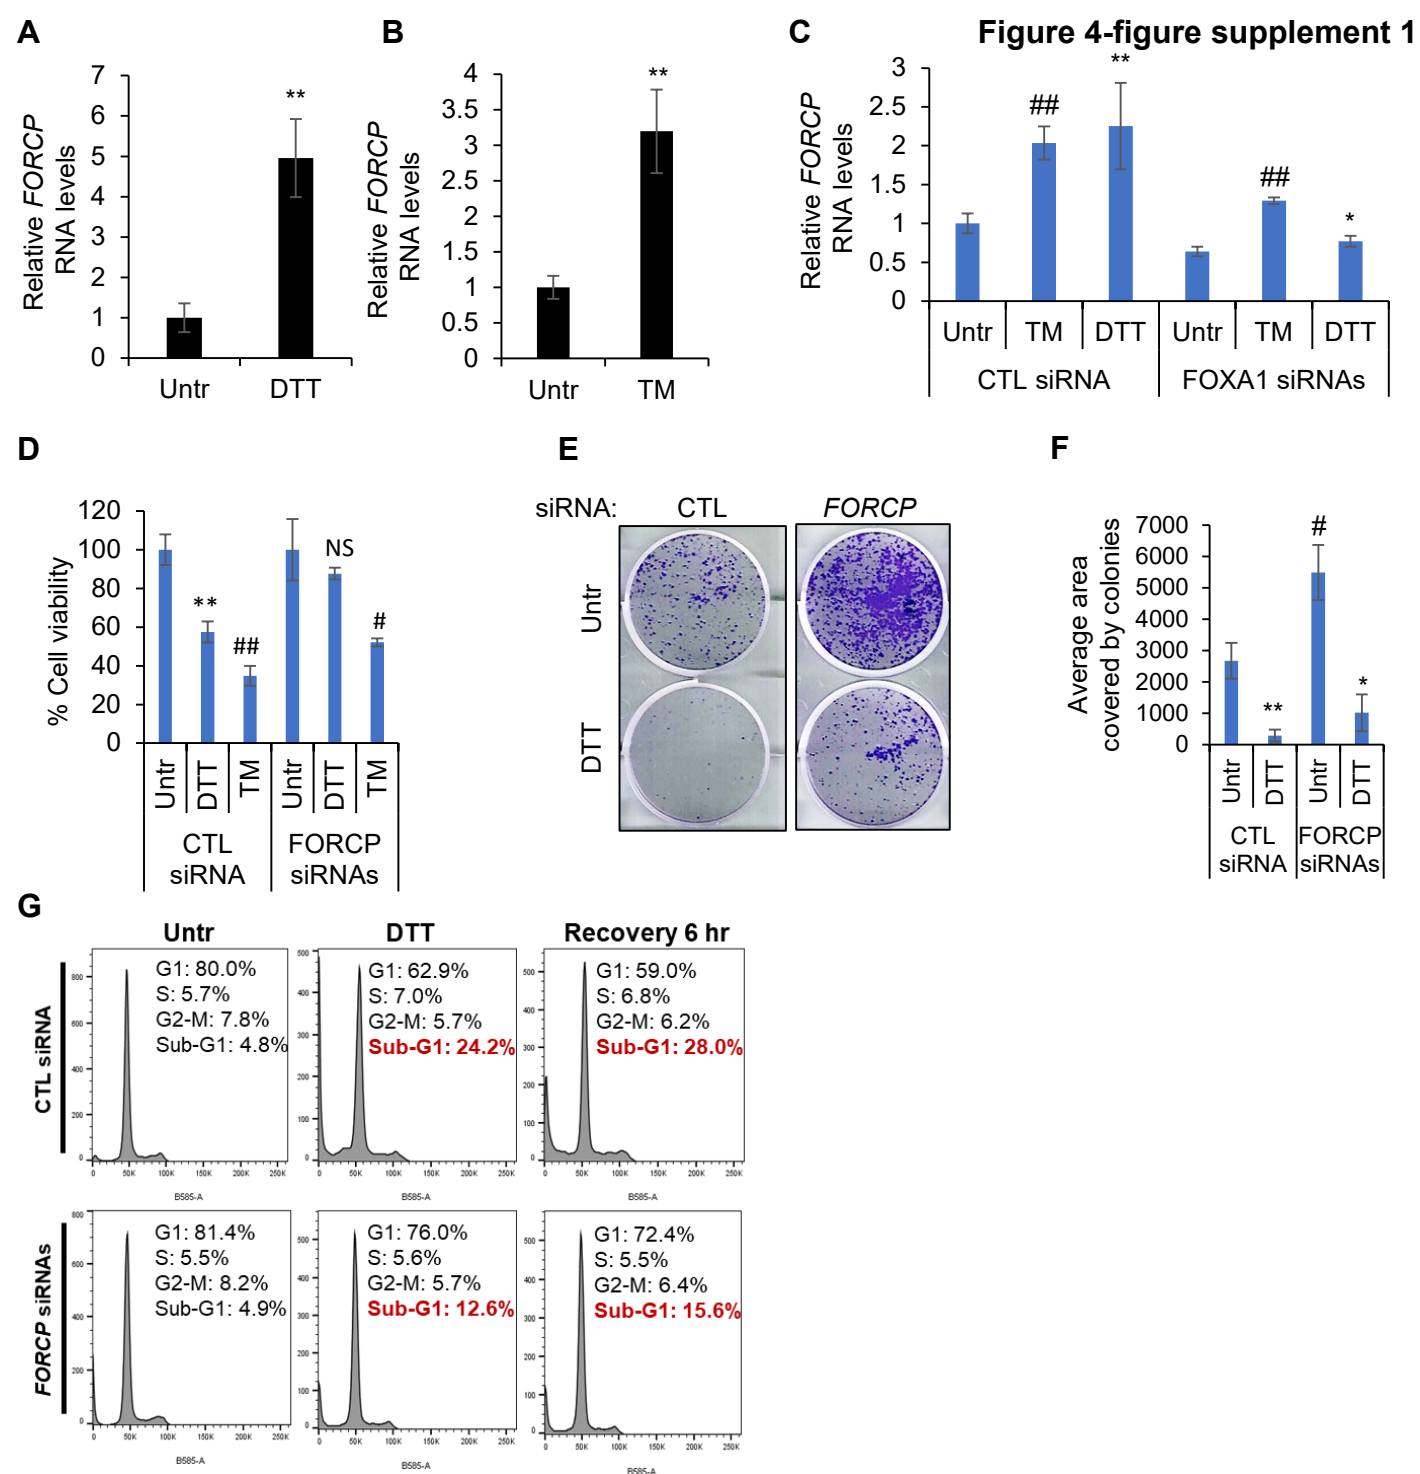

**Figure 4-figure supplement 1.**

(A, B) qRT-PCR was performed from LS180 cells after induction of ER stress using 0.5 mM DTT (A) or 4 ug/ml TM (B) to determine the effect of ER stress on *FORCP* RNA levels. Data was normalized with *GAPDH*.

(C) The effect of FOXA1 knockdown on *FORCP* induction upon ER stress was determined by qRT-PCR after transfection of LS180 cells with CTL siRNA or FOXA1 siRNAs for 48 hr followed by treatment with DTT for 2 hr.

(D) Cell viability assays were performed from LS180 cells transfected with CTL siRNA or *FORCP* siRNAs under untreated (Untr), DTT treated or Tunicamycin (TM) treated conditions. Cell viability was measured using CCK-8 assay. P-values were calculated by comparing DTT or TM treated samples with untreated (Utr).

(E, F) Colony formation on plastic assays were performed from LS180 cells following *FORCP* knockdown and treatment with ER-stress inducing agents (DTT or TM). Quantification of colonies was performed using ImageJ software. (G) PI staining and FACS analysis was performed from SW1222 cells transfected for 48 hr with CTL siRNA or *FORCP* siRNAs and then left untreated or treated with DTT for 2 hr or after 6 hr recovery from DTT treatment. Error bars represent SD from 3 experiments. \*p<0.05, #p<0.01, \*\*p<0.005, ###p<0.001.
