# Supplementary material for: A small protein encoded by a putative lncRNA regulates apoptosis and tumorigenicity in human colorectal cancer cells
Source: eLife journal article supplement (doi:10.7554/elife.53734), 2020-10-28
Supplement: supp [file elife-53734-supp-v1.zip]

|                 |                    |                                                                                                           |
|-----------------|--------------------|-----------------------------------------------------------------------------------------------------------|
| Human           | LINC00675          | MLLGSWLGRCHPGRCALFLILALLLDAVGLVLLLLLGILAPLSSWDFFIYTGALILALSLLLWIWYSLNIEVSPKLDL                            |
| Mus             | ENSMUST00000211300 | MLLGRPCTRCHLGRCVFFLIVALLSDAVGLGLLLLGIFATLNYWDFFVYTGSLILALSLLFWLAWYSFNIEVPLEKLDL                           |
| Rat             |                    | MLLGRPCTRCHLGRCVFFLIVALLSDAVGLVLLLLGIFAPLNYWDFFVYTGALILALSLLFWLAWYSFNIEVPLEKLDL                           |
| Squirrel        |                    | MLLGRPCHGRCHPGRCVFLIVIALLCDAAGLVLLLLGIFATLNYWDFLVYTGALILALSLLFWIAWYSFNIEVPLEKLDL                          |
| Baboon          |                    | MLLGSWLRRCHPGRCVFLVLALLLDVGLVLLLLGILASLSYWDFFVYTGALILAFSLLFWVIWYSLNIEVSPKLDL                              |
| Squirrel monkey |                    | MLLGRLWGRCHPGRWALFLILAILLDTVGLVLLLLGILASLSYWDFLVYTGALILAFSLLFWIWIWYSCNIEVSPKLDL                           |
| Cat             |                    | MLLGRRWGRCNLGRCVLFLVLALLLDAVGLVLLLLGVFASLDYWDFLVYTGALTFLVFSLLFWITWYSLNIEVPLEKLDL                          |
| Panda           |                    | MLLGRRWGRCHPGRCALLLALLLDAAGLVLLLLGIFASLDYWDFLVYTGALVLAFLVSLVWISWYSFNIEEPLEKLN                             |
|                 |                    | ****      **: **    .:.*    :*: *    *..**    .*****:*. *    *****: *    *:***:*.    *** **    .    ***:. |

**B**

>ENSMUST00000211300.1

gggcaATGCTCCTGGGTAGACCTTGACACGATGCCATCTCGGGCGCTGTTATTTTCTCATTGTGGCTCTTTTGAGCGACGCT  
GTGGGCCTGGGCCTTTTGTTACTGGGGATCTTTGCTACCCTAACTACTGGGACTTCTTTGTCTACACAGGATCTCTGATCCTG  
GCTCTGAGCCTACTGTTCTGGCTGGCCTGGATTCTTCAATATCGAGGTACCTCTTGAAAAGCTGGACTTTTACgtgcatggacaa  
gagggatgcaggtggcatatgctgatgtgaacctgaggacctggacatgaagccccacacagaatgccactaagaccagcatgggtctgtctggccagaagaatcaaataagg  
tatgcagtctttgcagcacacctccgatagatccaagagggaccagatgctgcgatgacggagcctcacatcaccaccaggatagccgagaatgactgtgaataccaggactct  
ctgagcccaatctccccgtgccaaacctgatactgctgccagcaccacagaagtgttgaggggcagaggagccatgaagttccaccagtggggctttataggaacctccactc  
ctggcttagataccaaagaaacctctgtgcaagtctttcaagaactgccaaactgaaatcggggtctcccgtagcatgggcccacagtactgtgtcatgtcccttgacatccactag  
actccaagtgcctgtctcttcatccaccactgaggggatacacagaagccaattccaacatggagactgcaacatgaatgcgcaggcagcagtgagcacacaggactctcctgttc  
acgcaggcccacctaggtgcagagccaggccatgagggtgctcacagtgtgctccaggtcacctgaaa

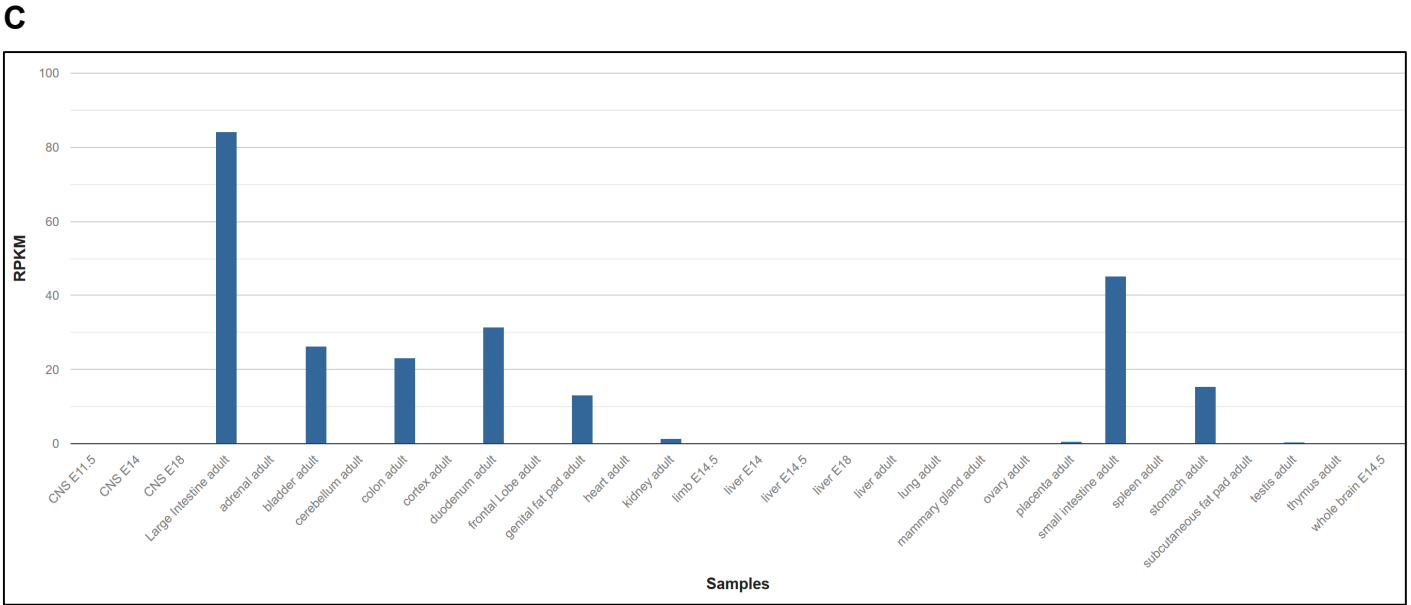

**Figure 2-figure supplement 2.**

**(A)** Sequence of the 79 amino acid FORCP protein and its conservation in mammals is shown. **(B)** Sequence of the mouse homolog of *FORCP* transcript and the 240 nt ORF (underlined sequence in upper case) with the start codon (green) and stop codon (red) is shown. **(C)** In mouse ENCODE transcriptome data obtained from <https://www.ncbi.nlm.nih.gov/gene/71576#gene-expression>, the mouse homolog of *FORCP* (also known as *Tmem238l* or *9130409J20Rik*) shows biased expression in large intestine adult (RPKM 84.1), small intestine adult (RPKM 45.2) and 5 other tissues.
