# Supplementary material for: A small protein encoded by a putative lncRNA regulates apoptosis and tumorigenicity in human colorectal cancer cells
Source: eLife. 2020 Oct 28;9:e53734. doi: 10.7554/eLife.53734 (PMC7673786; doi:10.7554/eLife.53734)
Supplement: Supplementary file 1. [file elife-53734-supp1.xls]

## Sheet: Supplementary file 1
Expression of FORCP, NORAD and MALAT1 in the NCI-60 panel of cell lines.
Cell line	FORCP (LINC00675)	NORAD (LINC00657)	MALAT1
CO:COLO 205	2.467	3.757	4.171
CO:HT29	1.647	4.261	6.546
CO:KM12	1.151	3.718	4.897
LE:RPMI-8226	0.302	2.687	4.468
PR:DU-145	0.278	2.409	5.731
CO:HCC-2998	0.247	3.761	5.402
ME:M14	0.227	3.523	4.896
ME:MDA-N	0.222	2.896	2.835
BR:HS 578T	0.154	2.813	5.149
RE:ACHN	0.127	2.903	5.657
PR:PC-3	0.12	4.61	5.557
LE:MOLT-4	0.116	3.347	6.045
ME:SK-MEL-5	0.1	3.116	5.357
CNS:SNB-19	0.099	3.65	4.306
RE:A498	0.088	2.602	4.952
LC:NCI-H460	0.073	2.537	5.46
LC:NCI-H226	0.068	3.186	7.17
CNS:SNB-75	0.066	4.051	6.959
OV:OVCAR-5	0.064	1.868	5.761
LC:NCI-H522	0.053	3.561	6.196
CO:HCT-116	0.052	4.491	6.519
ME:SK-MEL-2	0.039	3.798	4.182
BR:BT-549	0	2.659	5.479
BR:MCF7	0	3.786	6.058
BR:MDA-MB-231	0	4.743	6.979
BR:T-47D	0	4.229	8.04
CNS:SF-268	0	2.774	6.564
CNS:SF-295	0	4.067	5.115
CNS:SF-539	0	4.52	5.777
CNS:U251	0	3.242	6.534
CO:HCT-15	0	3.947	5.455
CO:SW-620	0	3.929	6.97
LC:A549/ATCC	0	2.9	5.742
LC:EKVX	0	3.591	6.056
LC:HOP-62	0	3.023	6.112
LC:HOP-92	0	4.379	7.199
LC:NCI-H23	0	4.261	4.367
LC:NCI-H322M	0	4.913	6.573
LE:CCRF-CEM	0	4.763	3.889
LE:HL-60(TB)	0	2.471	4.663
LE:K-562	0	3.584	6.704
LE:SR	0	2.718	6.042
ME:LOX IMVI	0	3.362	4.757
ME:MALME-3M	0	3.885	5.387
ME:MDA-MB-435	0	4.202	4.204
ME:SK-MEL-28	0	3.628	4.697
ME:UACC-257	0	3.786	6.179
ME:UACC-62	0	4.066	5.385
OV:IGROV1	0	3.579	6.178
OV:NCI/ADR-RES	0	4.616	4.479
OV:OVCAR-3	0	3.116	6.024
OV:OVCAR-4	0	3.199	6.46
OV:OVCAR-8	0	3.363	5.798
OV:SK-OV-3	0	3.557	7.137
RE:786-0	0	2.353	6.137
RE:CAKI-1	0	4.025	5.424
RE:RXF 393	0	3.549	7.537
RE:SN12C	0	3.7	7.615
RE:TK-10	0	3.797	6.465
RE:UO-31	0	3.898	5.5
