# Supplementary material for: A small protein encoded by a putative lncRNA regulates apoptosis and tumorigenicity in human colorectal cancer cells
Source: eLife. 2020 Oct 28;9:e53734. doi: 10.7554/eLife.53734 (PMC7673786; doi:10.7554/eLife.53734)
Supplement: Supplementary file 2. — Poorly differentiated CRC lines are shown in yellow. Well-differentiated CRC lines are shown in blue. Data for FORCP (LINC00675) is shown in green. [file elife-53734-supp2.xlsx]

## Sheet: Supplementary file 2
RNA-seq data from 7 CRC lines is shown. Poorly differentiated CRC lines are shown in yellow. Well-differentiated CRC lines are shown in Blue. Data for FORCP (LINC00675) is shown in Green.
Row.names	Ensembel ID	baseMean	log2FoldChange (Diff/Undiff)	Fold change (Diff/Undiff)	lfcSE	stat	p-value	adjusted p-value	HCT116.fpkm	SW480.fpkm	RKO.fpkm	SW48.fpkm	SW1222.fpkm	LS180.fpkm	C80.fpkm	gene_type	gene_status	gene_name
9766	ENSG00000163586	10173	16.9877	129956	2.09965	8.09072	5.93108e-16	1.89825e-13	0	0	0	0	754.818	2.31683	33.0157	protein_coding	KNOWN	FABP1
2827	ENSG00000105388	7134.62	15.7545	55281	1.21155	13.0036	1.1674e-38	2.39746e-35	0.00783852	0	0	0	106.746	81.1199	220.591	protein_coding	KNOWN	CEACAM5
3029	ENSG00000106541	13354.3	15.0171	33158	1.09534	13.71	8.84616e-43	2.18005e-39	0.0184653	0.0147959	0	0	93.5078	529.104	277.881	protein_coding	KNOWN	AGR2
6621	ENSG00000137033	2199.35	14.7781	28097.3	1.41826	10.4199	2.01148e-25	1.90657e-22	0	0	0	0	16.665	92.1542	20.8892	protein_coding	KNOWN	IL33
3842	ENSG00000113722	3743.38	14.1434	18096	1.15157	12.2818	1.13397e-34	1.86303e-31	0	0.0239444	0	0	110.883	97.528	200.076	protein_coding	KNOWN	CDX1
9235	ENSG00000160182	3337.33	13.9789	16145.8	1.15926	12.0584	1.75084e-33	2.5381e-30	0	0.0763963	0	0	563.357	351.379	247.188	protein_coding	KNOWN	TFF1
9233	ENSG00000160180	6214.04	13.6431	12793.4	0.967978	14.0944	4.10882e-45	1.26572e-41	0	0.0900992	0	0	345.797	271.643	403.15	protein_coding	KNOWN	TFF3
14757	ENSG00000198643	1536.87	13.5395	11906.9	1.77548	7.62584	2.42452e-14	6.35637e-12	0	0	0	0.019246	0.694304	63.0937	115.977	protein_coding	KNOWN	FAM3D
10539	ENSG00000166920	772.757	13.2691	9871.63	1.92695	6.88606	5.73591e-12	1.00968e-09	0	0	0	0	45.1866	0.26942	60.0614	protein_coding	KNOWN	C15orf48
12766	ENSG00000180785	1688.86	13.2534	9764.64	3.54057	3.74328	0.000181636	0.00435855	0	0.0116476	0	0	0	21.1208	68.5201	protein_coding	KNOWN	OR51E1
18825	ENSG00000233041	1879.97	13.1403	9028.89	1.09128	12.0412	2.15841e-33	2.9551e-30	0	0.0447336	0	0	100.641	142.569	140.028	protein_coding	KNOWN	PHGR1
1335	ENSG00000079112	7881.81	12.8834	7556	0.669213	19.2516	1.36953e-82	1.68753e-78	0.0269335	0.016186	0	0.0242733	89.1329	159.795	138.626	protein_coding	KNOWN	CDH17
11461	ENSG00000171747	10154.5	12.7295	6791.42	0.597567	21.3022	1.08325e-100	2.66956e-96	0.00993077	0.0318294	0.0237672	0.0835326	241.004	262.024	233.352	protein_coding	KNOWN	LGALS4
1564	ENSG00000086548	3827.21	12.6145	6271.24	0.897289	14.0585	6.83249e-45	1.87089e-41	0.0172185	0.0206953	0	0.0103453	77.9369	128.251	34.4206	protein_coding	KNOWN	CEACAM6
13	ENSG00000001626	5872.68	12.478	5704.97	0.794142	15.7126	1.24077e-55	6.1155e-52	0.00925216	0.00988478	0.00738102	0.00370593	61.8312	15.3962	55.0266	protein_coding	KNOWN	CFTR
12016	ENSG00000175311	679.691	12.3623	5265.35	1.23548	10.0061	1.43356e-23	1.07057e-20	0	0.00483621	0	0	8.25763	5.1625	16.5377	protein_coding	KNOWN	ANKS4B
8370	ENSG00000151490	4816.33	12.3194	5110.95	1.25464	9.81905	9.32133e-23	6.04513e-20	0	0.0223936	0	0.00839564	70.1858	6.40847	46.2642	protein_coding	KNOWN	PTPRO
13968	ENSG00000188373	376.226	12.2307	4806.12	1.33861	9.13687	6.42889e-20	3.23334e-17	0	0	0	0	52.1041	13.8666	15.3113	protein_coding	KNOWN	C10orf99
23593	ENSG00000263429	567.747	12.1026	4397.83	1.20795	10.0191	1.25662e-23	9.67756e-21	0.0159386	0	0	0	32.6256	11.6063	21.8452	lincRNA	KNOWN	LINC00675
6135	ENSG00000134193	2838.45	12.0884	4354.69	1.47366	8.20293	2.34592e-16	8.14266e-14	0.0300794	0	0	0.0180724	4.45245	137.241	14.1567	protein_coding	KNOWN	REG4
10161	ENSG00000165092	2121.02	12.0126	4131.91	1.08581	11.0633	1.8902e-28	2.11737e-25	0.0368787	0.00738756	0	0	88.9509	21.6806	32.151	protein_coding	KNOWN	ALDH1A1
4376	ENSG00000118322	2884.7	11.951	3959.13	1.31492	9.08874	1.00196e-19	4.74852e-17	0.0162571	0	0	0	12.5626	9.87732	26.4762	protein_coding	KNOWN	ATP10B
10134	ENSG00000164946	301.055	11.909	3845.71	2.18838	5.44194	5.27029e-08	3.99634e-06	0	0	0	0	0.211607	0.00827608	5.14686	protein_coding	KNOWN	FREM1
6139	ENSG00000134215	765.254	11.8296	3639.79	1.08083	10.945	7.02182e-28	7.52373e-25	0.00361255	0.00289467	0	0	8.11661	5.30409	6.76434	protein_coding	KNOWN	VAV3
14446	ENSG00000197273	271.376	11.7593	3466.63	1.93694	6.07107	1.27061e-09	1.43637e-07	0	0	0	0	62.9145	0.273932	28.3107	protein_coding	KNOWN	GUCA2A
14275	ENSG00000196549	3511.68	11.7589	3465.65	2.12422	5.53564	3.10094e-08	2.47312e-06	0	0.0262543	0	0	36.7563	33.2312	0.018435	protein_coding	KNOWN	MME
5315	ENSG00000127324	5730.82	11.7275	3390.95	1.39948	8.37985	5.2995e-17	2.00925e-14	0	0.142041	0	0.0250603	25.3908	164.566	246.339	protein_coding	KNOWN	TSPAN8
2659	ENSG00000104327	7532.82	11.5559	3010.67	1.60576	7.19649	6.17828e-13	1.34244e-10	0.0441584	0.00589722	0.0132105	0.0265313	194.343	7.96089	0.0662536	protein_coding	KNOWN	CALB1
3881	ENSG00000114248	232.629	11.537	2971.51	1.66764	6.91815	4.57564e-12	8.35275e-10	0	0	0	0	0.838607	1.28751	12.2103	protein_coding	KNOWN	LRRC31
9480	ENSG00000162366	214.043	11.4171	2734.61	1.11289	10.2589	1.07887e-24	8.86256e-22	0	0	0	0	8.76813	10.2508	9.53729	protein_coding	KNOWN	PDZK1IP1
15955	ENSG00000214039	521.965	11.2975	2516.99	1.13041	9.99412	1.6172e-23	1.17218e-20	0	0.00894102	0	0	5.68067	9.78547	5.7947	lincRNA	NOVEL	RP11-474D1.3
6004	ENSG00000133019	312.648	11.2418	2421.61	1.48206	7.58525	3.31857e-14	8.51905e-12	0	0.00172943	0	0	0.207664	1.55703	3.16218	protein_coding	KNOWN	CHRM3
1038	ENSG00000070526	1649	11.1619	2291.19	0.95345	11.7068	1.17584e-31	1.37988e-28	0.030472	0.0122083	0.00911603	0	9.48829	46.9876	35.2237	protein_coding	KNOWN	ST6GALNAC1
7451	ENSG00000143167	3576.28	11.0652	2142.65	0.652893	16.9479	1.99339e-64	1.22813e-60	0.0082084	0.0460407	0.0196451	0.0591814	80.2355	88.1417	45.8971	protein_coding	KNOWN	GPA33
11748	ENSG00000173467	156.838	10.9686	2003.87	1.31496	8.3414	7.34188e-17	2.7005e-14	0	0	0	0	3.13634	12.3811	10.4215	protein_coding	KNOWN	AGR3
14476	ENSG00000197408	399.656	10.8598	1858.28	1.51461	7.16999	7.50021e-13	1.5664e-10	0.0146374	0	0	0	15.662	0.967851	4.71897	protein_coding	KNOWN	CYP2B6
10713	ENSG00000167741	1131.75	10.846	1840.62	0.844866	12.8375	1.01068e-37	1.91593e-34	0.0332387	0.0133168	0	0	32.2705	17.8007	18.5704	protein_coding	KNOWN	GGT6
9627	ENSG00000162981	2878.14	10.8293	1819.53	1.27242	8.5108	1.72735e-17	7.33947e-15	0	0.0426768	0.00374906	0	24.4497	20.9123	20.4511	protein_coding	KNOWN	FAM84A
20469	ENSG00000242515	187.891	10.5068	1455	1.48595	7.07076	1.54086e-12	3.01374e-10	0	0.00666683	0	0	8.34837	2.42628	0.636649	protein_coding	KNOWN	UGT1A10
11835	ENSG00000174080	175.619	10.4091	1359.68	2.00436	5.1932	2.0671e-07	1.30955e-05	0	0	0.0108536	0	0.0191797	10.8182	0.785883	protein_coding	KNOWN	CTSF
9572	ENSG00000162739	105.824	10.4006	1351.75	2.12461	4.8953	9.81563e-07	5.27008e-05	0	0	0	0	0.0101137	1.05414	6.32911	protein_coding	KNOWN	SLAMF6
21069	ENSG00000248771	96.1913	10.2631	1228.82	1.65757	6.19164	5.95406e-10	7.44831e-08	0	0	0	0	0.139296	2.22668	3.41902	lincRNA	NOVEL	RP11-294O2.2
16561	ENSG00000222001	93.3754	10.2201	1192.74	1.45213	7.03798	1.9505e-12	3.7849e-10	0	0	0	0	15.6112	3.47833	2.94483	protein_coding	KNOWN	AC106876.2
20328	ENSG00000241388	89.1625	10.1531	1138.65	1.27347	7.97279	1.55131e-15	4.71981e-13	0	0	0	0	2.16622	0.703951	1.5625	antisense	KNOWN	HNF1A-AS1
5035	ENSG00000124664	233.113	10.086	1086.9	1.25542	8.03394	9.43928e-16	2.94458e-13	0.0137235	0	0	0.0164908	6.86324	13.6928	2.77969	protein_coding	KNOWN	SPDEF
8569	ENSG00000153294	135.947	10.0394	1052.33	1.2877	7.79633	6.3732e-15	1.78479e-12	0	0.00620677	0	0	4.52905	1.14256	2.01349	protein_coding	KNOWN	GPR115
14597	ENSG00000197937	76.9599	9.94109	983.03	1.76039	5.6471	1.6318e-08	1.41599e-06	0	0	0	0	0.0273737	0.414561	1.17504	protein_coding	KNOWN	ZNF347
4807	ENSG00000122711	827.301	9.91849	967.748	1.26069	7.8675	3.61808e-15	1.02487e-12	0	0.0965466	0.144184	0.0965242	3.05749	134.077	105.213	protein_coding	KNOWN	SPINK4
9986	ENSG00000164266	74.813	9.89999	955.422	1.3547	7.30787	2.71419e-13	6.37034e-11	0	0	0	0	5.5732	1.24875	2.87585	protein_coding	KNOWN	SPINK1
14401	ENSG00000197085	72.9769	9.86462	932.277	2.42894	4.06129	4.88029e-05	0.00149404	0	0	0	0	1.40307	0.567167	0	processed_transcript	KNOWN	NPSR1-AS1
162	ENSG00000007306	70.935	9.8239	906.333	1.79227	5.48126	4.22308e-08	3.2625e-06	0	0	0	0	2.73633	2.3452	0.0557897	protein_coding	KNOWN	CEACAM7
11131	ENSG00000169903	70.6945	9.819	903.261	2.5455	3.8574	0.000114599	0.00300444	0	0	0	0	0	5.7852	0.552474	protein_coding	KNOWN	TM4SF4
14426	ENSG00000197172	583.623	9.79979	891.312	1.8607	5.26673	1.38876e-07	9.40234e-06	0.0563969	0	0	0.0338845	45.7354	14.2589	0.0158655	protein_coding	KNOWN	MAGEA6
19005	ENSG00000233864	69.3426	9.79077	885.758	2.50396	3.91011	9.22551e-05	0.00252335	0	0	0	0	2.08134	0	0.436313	lincRNA	KNOWN	TTTY15
3712	ENSG00000112562	939.732	9.55626	752.87	1.22755	7.78485	6.97972e-15	1.93268e-12	0	0.0104401	0	0.070454	7.57673	11.0395	26.0167	protein_coding	KNOWN	SMOC2
20309	ENSG00000241224	56.8047	9.50261	725.39	1.79348	5.29843	1.16801e-07	8.01794e-06	0	0	0	0	0.468867	0.131135	3.67872	lincRNA	NOVEL	RP11-59E19.1
17772	ENSG00000228437	56.5307	9.49596	722.051	1.91697	4.95363	7.28413e-07	4.04302e-05	0	0	0	0	6.93288	0.0978043	0.908792	lincRNA	NOVEL	RP11-400N13.2
10159	ENSG00000165078	54.5998	9.44629	697.618	1.37611	6.8645	6.67244e-12	1.158e-09	0	0	0	0	2.00566	1.18489	0.42896	protein_coding	KNOWN	CPA6
6476	ENSG00000136155	225.668	9.44153	695.321	1.60801	5.87157	4.31683e-09	4.28968e-07	0.0124932	0	0	0.00750616	9.20676	0.148269	0.920813	protein_coding	KNOWN	SCEL
3813	ENSG00000113494	249.54	9.40562	678.225	1.51122	6.22387	4.85025e-10	6.16132e-08	0	0.00642416	0	0	0.0953642	1.42895	2.12236	protein_coding	KNOWN	PRLR
378	ENSG00000021645	417.227	9.40281	676.907	1.60636	5.85348	4.81382e-09	4.689e-07	0	0.00948376	0	0	1.71978	3.31099	0.112255	protein_coding	KNOWN	NRXN3
3360	ENSG00000109610	428.835	9.37463	663.814	1.59925	5.86188	4.57665e-09	4.4935e-07	0	0.0593435	0	0.0148324	2.21864	35.6185	0.750046	protein_coding	KNOWN	SOD3
12777	ENSG00000180861	2869.68	9.34568	650.623	1.39602	6.69452	2.16376e-11	3.50815e-09	0.212633	0.0159731	0	0.0558927	114.053	5.44136	19.4931	protein_coding	KNOWN	C12orf36
12133	ENSG00000176153	6708.36	9.34155	648.763	0.910031	10.2651	1.01231e-24	8.81952e-22	0.0700917	1.23559	0.209687	0.231619	292.562	208.66	355.596	protein_coding	KNOWN	GPX2
8685	ENSG00000154620	50.6431	9.33676	646.614	1.58583	5.88761	3.9181e-09	3.97357e-07	0	0	0	0	1.54752	0.306852	3.96696	protein_coding	KNOWN	TMSB4Y
3755	ENSG00000112964	48.9737	9.28955	625.797	1.81289	5.12416	2.98861e-07	1.81407e-05	0	0	0	0	0.0168062	0.872481	0.532122	protein_coding	KNOWN	GHR
11707	ENSG00000173212	126.494	9.24286	605.869	1.48047	6.24321	4.28688e-10	5.50239e-08	0	0.00646412	0.00965359	0	6.0645	0.410322	0.962249	protein_coding	KNOWN	MAB21L3
5915	ENSG00000132437	819.565	9.23159	601.153	0.952913	9.68775	3.39921e-22	1.94814e-19	0.0502555	0.0201344	0.030069	0.0100649	10.326	3.7348	35.9665	protein_coding	KNOWN	DDC
14771	ENSG00000198692	359.776	9.21157	592.87	1.65029	5.58177	2.3808e-08	1.99566e-06	0.0193423	0.0103324	0	0.00774752	7.41682	0.00546558	9.48245	protein_coding	KNOWN	EIF1AY
10589	ENSG00000167165	366.257	9.20805	591.426	1.54229	5.97036	2.36725e-09	2.52548e-07	0	0.0284421	0	0	9.03936	4.0063	0.490721	protein_coding	KNOWN	UGT1A6
12507	ENSG00000178828	45.0739	9.16897	575.618	1.78285	5.14287	2.70566e-07	1.6628e-05	0	0	0	0	4.39911	0.106881	2.41188	protein_coding	KNOWN	RNF186
11375	ENSG00000171234	43.6545	9.12394	557.931	2.15391	4.23599	2.27544e-05	0.000788692	0	0	0	0	0.012294	3.42035	0.27477	protein_coding	KNOWN	UGT2B7
14584	ENSG00000197888	42.6007	9.0884	544.355	2.48017	3.66442	0.000247895	0.00560471	0	0	0	0	0	3.23764	0.697309	protein_coding	KNOWN	UGT2B17
25379	ENSG00000275718	41.8196	9.06273	534.752	1.33103	6.8088	9.84187e-12	1.66125e-09	0	0	0	0	1.03256	2.95463	1.15577	NA	NA	NA
11771	ENSG00000173597	220.064	9.03959	526.246	1.1401	7.92874	2.21373e-15	6.5729e-13	0.00714162	0.00286122	0	0.00429084	0.490808	1.28043	3.95384	protein_coding	KNOWN	SULT1B1
9747	ENSG00000163515	68.0008	9.03933	526.149	1.7227	5.2472	1.54429e-07	1.03137e-05	0	0.01903	0	0	0.100442	6.94579	4.73025	protein_coding	KNOWN	RETNLB
8279	ENSG00000150540	577.592	9.02436	520.718	0.681398	13.2439	4.89521e-40	1.0967e-36	0.0220916	0.0265524	0.00660893	0	7.64377	6.16597	9.434	protein_coding	KNOWN	HNMT
17045	ENSG00000225328	66.8834	9.01455	517.189	1.53292	5.88062	4.08726e-09	4.09457e-07	0	0.0344471	0	0	1.40906	3.06123	16.496	antisense	NOVEL	AC019100.3
10952	ENSG00000168903	66.0811	8.99604	510.597	1.83873	4.89253	9.95496e-07	5.33326e-05	0	0	0	0.0129358	0.0569102	0.401532	4.72434	protein_coding	KNOWN	BTNL3
3331	ENSG00000109205	65.3597	8.98092	505.273	1.61468	5.56204	2.66635e-08	2.19032e-06	0.0168162	0	0	0	6.77413	0.441914	0.794757	protein_coding	KNOWN	ODAM
14127	ENSG00000189325	206.509	8.97088	501.769	1.02631	8.74088	2.31293e-18	1.03636e-15	0.00703075	0.0112672	0.0084133	0	1.75435	2.26482	6.55864	protein_coding	KNOWN	C6orf222
22897	ENSG00000259674	39.286	8.97057	501.661	1.50756	5.95039	2.67507e-09	2.83625e-07	0	0	0	0	6.37167	0.88845	2.13757	pseudogene	KNOWN	RP11-356M20.1
8570	ENSG00000153303	103.459	8.95522	496.353	1.47699	6.06315	1.33481e-09	1.4942e-07	0.00453816	0.00363635	0	0	2.73979	0.180812	0.500453	protein_coding	KNOWN	FRMD1
14494	ENSG00000197497	36.8289	8.87852	470.652	1.22985	7.21918	5.23025e-13	1.17177e-10	0	0	0	0	0.208059	0.381291	0.355875	protein_coding	KNOWN	ZNF665
7723	ENSG00000144852	292.683	8.87139	468.333	1.0922	8.12247	4.5679e-16	1.4812e-13	0.00976282	0.00782277	0	0.0117314	0.541921	3.37664	6.48713	protein_coding	KNOWN	NR1I2
12758	ENSG00000180745	1071.55	8.86067	464.864	0.715807	12.3786	3.41343e-35	6.00861e-32	0.159608	0.200971	0	0.136994	85.9443	43.6444	48.3643	protein_coding	KNOWN	CLRN3
14066	ENSG00000188959	914.249	8.81468	450.281	0.741843	11.8821	1.46578e-32	1.90119e-29	0.00891309	0.0785609	0.0746605	0.0107104	21.5995	14.2955	23.4493	protein_coding	KNOWN	C9orf152
14805	ENSG00000198788	320.515	8.77037	436.662	1.55221	5.65025	1.60211e-08	1.39513e-06	0.00604322	0.014527	0	0	0.0670903	6.00663	0.979239	protein_coding	KNOWN	MUC2
4908	ENSG00000123700	403.585	8.74943	430.369	1.94267	4.50382	6.67442e-06	0.00027598	0	0.0415132	0	0	0.0298786	6.66766	7.14423	protein_coding	KNOWN	KCNJ2
9606	ENSG00000162897	33.1482	8.72758	423.9	1.45755	5.98783	2.12655e-09	2.2885e-07	0	0	0	0	0.509797	1.09416	0.191985	protein_coding	KNOWN	FCAMR
6400	ENSG00000135773	90.5251	8.72034	421.777	1.35381	6.44133	1.18427e-10	1.66773e-08	0.0202598	0	0	0	2.20635	3.82133	0.649738	protein_coding	KNOWN	CAPN9
5001	ENSG00000124469	53.4064	8.68971	412.918	1.34557	6.45802	1.06084e-10	1.51118e-08	0.0102967	0	0	0	1.95962	1.64099	0.405531	protein_coding	KNOWN	CEACAM8
13640	ENSG00000186188	148.954	8.68812	412.463	1.73692	5.00203	5.673e-07	3.25887e-05	0	0.0207361	0	0	1.75115	5.21569	0.050961	protein_coding	KNOWN	FFAR4
9891	ENSG00000163993	3556.89	8.65179	402.205	1.08599	7.96674	1.62916e-15	4.89622e-13	0.225731	1.34833	0.0491126	0.123295	200.611	272.264	58.4913	protein_coding	KNOWN	S100P
6141	ENSG00000134240	5429.56	8.61987	393.404	3.02487	2.84967	0.00437649	0.0506358	0	1.36712	0	0	297.176	37.3451	69.2661	protein_coding	KNOWN	HMGCS2
21046	ENSG00000248635	29.7671	8.57142	380.411	1.5624	5.48605	4.1103e-08	3.1954e-06	0	0	0	0	0.444355	3.85958	3.31043	pseudogene	KNOWN	RP11-1267H10.4
15441	ENSG00000206069	80.1172	8.53293	370.398	1.6683	5.11475	3.14156e-07	1.90223e-05	0.0467798	0	0	0	10.362	0.277591	3.00048	protein_coding	KNOWN	TMEM211
20456	ENSG00000242366	28.5309	8.51128	364.879	1.63503	5.20559	1.93381e-07	1.24756e-05	0	0	0	0	0.461523	1.66515	0.147357	protein_coding	KNOWN	UGT1A8
10618	ENSG00000167332	28.3185	8.49847	361.654	2.60218	3.2659	0.00109115	0.017691	0	0	0	0	0	0.131802	1.75986	protein_coding	KNOWN	OR51E2
17805	ENSG00000228593	28.2094	8.49195	360.024	1.38644	6.12502	9.06727e-10	1.06809e-07	0	0	0	0	13.2032	3.77197	12.5982	pseudogene	KNOWN	CFTRP1
23958	ENSG00000266976	27.7961	8.47235	355.167	2.42051	3.50024	0.000464845	0.0092984	0	0	0	0	0.59249	0.605049	0	lincRNA	NOVEL	AC079466.1
15165	ENSG00000204385	1192.27	8.42402	343.466	0.439911	19.1494	9.79668e-82	8.04764e-78	0.0779664	0.062473	0.0559788	0.0655814	17.0145	22.6567	27.9606	protein_coding	KNOWN	SLC44A4
14726	ENSG00000198535	556.603	8.41738	341.889	0.844041	9.97272	2.00651e-23	1.37356e-20	0.0228739	0.0733138	0	0.0183242	14.5028	6.39241	9.98688	protein_coding	KNOWN	C2CD4A
6986	ENSG00000139292	830.254	8.41584	341.524	1.34025	6.27931	3.40083e-10	4.53027e-08	0.00500226	0.104214	0	0.00601093	2.581	15.4735	12.1641	protein_coding	KNOWN	LGR5
13672	ENSG00000186377	436.709	8.36815	330.419	1.26656	6.60701	3.9215e-11	5.98386e-09	0.0103088	0.115644	0	0	11.6953	5.22588	15.8343	protein_coding	KNOWN	CYP4X1
13225	ENSG00000183850	25.8053	8.36521	329.746	2.4514	3.41243	0.00064387	0.011922	0	0	0	0	0	1.00136	0.502952	protein_coding	KNOWN	ZNF730
15937	ENSG00000213988	42.522	8.35839	328.19	2.15015	3.88735	0.000101346	0.00271772	0	0	0.00626512	0	0	0.576975	1.04279	protein_coding	KNOWN	ZNF90
1122	ENSG00000072858	465.802	8.34183	324.446	0.802421	10.3958	2.59013e-25	2.36412e-22	0.0260713	0.0104452	0.00779953	0	5.16852	3.84282	2.03161	protein_coding	KNOWN	SIDT1
180	ENSG00000007952	1877.87	8.33983	323.995	0.560337	14.8836	4.21321e-50	1.7305e-46	0.155794	0.14148	0.124287	0.162248	56.5766	19.5638	65.7298	protein_coding	KNOWN	NOX1
11153	ENSG00000169994	1090.88	8.31787	319.102	0.771491	10.7816	4.20679e-27	4.31967e-24	0.0179092	0.0143503	0.0607211	0.0071735	4.31415	7.43407	11.9338	protein_coding	KNOWN	MYO7B
218	ENSG00000009765	104.509	8.31606	318.702	1.19952	6.9328	4.12592e-12	7.58799e-10	0.00253492	0	0.0060668	0	0.249258	1.24636	0.430724	protein_coding	KNOWN	IYD
8294	ENSG00000150750	24.8839	8.31337	318.107	2.05071	4.0539	5.03713e-05	0.00152876	0	0	0	0	0.0219717	3.02997	0.724904	protein_coding	KNOWN	C11orf53
1017	ENSG00000070019	1328.56	8.26763	308.18	1.42252	5.81195	6.17476e-09	5.87532e-07	0	0.156204	0.105351	0	16.8348	8.81183	35.1122	protein_coding	KNOWN	GUCY2C
10525	ENSG00000166866	563.14	8.26675	307.992	0.981737	8.42054	3.74768e-17	1.47052e-14	0.0414304	0.0142275	0	0.0497845	11.602	1.98685	10.6494	protein_coding	KNOWN	MYO1A
12021	ENSG00000175329	225.481	8.1953	293.111	1.24965	6.55808	5.45051e-11	8.14075e-09	0.0155242	0.00621961	0.00928844	0.0279817	11.186	1.17124	0.366847	protein_coding	KNOWN	ISX
3588	ENSG00000111701	85.751	8.18942	291.918	1.48677	5.50819	3.62535e-08	2.85441e-06	0.0295465	0.0473502	0	0	12.6834	0.325611	5.41941	protein_coding	KNOWN	APOBEC1
22149	ENSG00000255531	22.41	8.16182	286.386	2.44503	3.33812	0.00084346	0.0146588	0	0	0	0	5.74272	8.83123	0	pseudogene	KNOWN	NDUFS5P6
10364	ENSG00000166143	247.768	8.09856	274.1	1.27888	6.33253	2.4118e-10	3.24789e-08	0.0300881	0.120545	0	0.108465	33.0848	0.790688	20.3144	protein_coding	KNOWN	PPP1R14D
10164	ENSG00000165105	1501.19	8.0943	273.292	1.29006	6.27438	3.51029e-10	4.60147e-08	0.169871	0.0348201	0	0.00474709	8.02381	16.9755	18.1061	protein_coding	KNOWN	RASEF
21037	ENSG00000248588	35.0735	8.08061	270.71	2.16164	3.73818	0.000185359	0.00443121	0.0449006	0	0	0	8.45034	3.00697	0	lincRNA	NOVEL	CTC-458G6.4
3096	ENSG00000107159	3297.25	8.06733	268.231	1.14663	7.03568	1.98292e-12	3.81774e-10	0.786433	0.315077	0.715221	0.0567007	100.778	6.6667	269.468	protein_coding	KNOWN	CA9
16808	ENSG00000224322	20.7449	8.05006	265.04	2.46414	3.26689	0.00108737	0.0176529	0	0	0	0	4.70217	2.317	0	lincRNA	NOVEL	AC004009.3
6282	ENSG00000135100	374.569	8.03047	261.465	0.66278	12.1164	8.65263e-34	1.33272e-30	0.0156724	0.0293019	0.0125028	0.0125551	2.73413	4.5747	6.91318	protein_coding	KNOWN	HNF1A
7262	ENSG00000141469	225.944	8.02992	261.365	1.2426	6.46218	1.03203e-10	1.47868e-08	0.0164786	0.016505	0	0	0.557534	0.946408	5.26155	protein_coding	KNOWN	SLC14A1
20385	ENSG00000241859	20.1737	8.00846	257.505	1.44481	5.5429	2.97503e-08	2.41173e-06	0	0	0	0	0.949576	0.234981	0.449162	pseudogene	KNOWN	KALP
5073	ENSG00000125144	55.6157	7.9959	255.273	1.53355	5.21399	1.84823e-07	1.19863e-05	0.0350225	0	0	0.0420845	6.18394	7.68946	0.275869	protein_coding	KNOWN	MT1G
10955	ENSG00000168907	481.583	7.96036	249.062	1.19252	6.67525	2.46806e-11	3.94954e-09	0.0215196	0.0517299	0	0.00517179	3.149	0.999689	10.9115	protein_coding	KNOWN	PLA2G4F
12699	ENSG00000180251	145.674	7.95962	248.935	1.31788	6.03972	1.54386e-09	1.69852e-07	0.00586576	0.0188005	0.00701922	0	5.40187	0.497248	0.310227	protein_coding	KNOWN	SLC9A4
12964	ENSG00000182352	19.3725	7.95201	247.625	2.58461	3.07668	0.00209319	0.0295613	0	0	0	0	0	1.17826	0.159597	protein_coding	KNOWN	C17orf77
6178	ENSG00000134398	1198.68	7.93653	244.982	0.858607	9.2435	2.38561e-20	1.27806e-17	0.147153	0.0379001	0.00628893	0.0568369	15.3753	8.22864	22.1592	protein_coding	KNOWN	ERN2
11786	ENSG00000173702	2963.11	7.91566	241.463	2.15617	3.67116	0.000241449	0.005469	0	0.891013	0	0	30.2825	55.8389	75.5928	protein_coding	KNOWN	MUC13
22183	ENSG00000255774	48.6681	7.91482	241.322	1.56396	5.06074	4.17627e-07	2.4622e-05	0	0.0579812	0	0	9.10438	3.12839	0.569977	lincRNA	NOVEL	AP000439.3
17931	ENSG00000229155	49.7973	7.90147	239.1	1.13442	6.96524	3.27856e-12	6.1671e-10	0	0.0427788	0	0	3.66909	2.69283	3.30418	lincRNA	NOVEL	RP11-528A4.2
3900	ENSG00000114405	30.8783	7.89546	238.106	2.35555	3.35185	0.000802737	0.0141406	0.00592932	0	0	0	0	0.0502636	1.28104	protein_coding	KNOWN	C3orf14
10754	ENSG00000167916	18.6191	7.8928	237.667	1.84426	4.27965	1.87185e-05	0.000668548	0	0	0	0	1.07781	0.0355132	0.785683	protein_coding	KNOWN	KRT24
8590	ENSG00000153707	709.76	7.87717	235.106	0.808623	9.74146	2.00641e-22	1.26784e-19	0.0329365	0.0207361	0.0140762	0	3.77095	5.70979	2.64732	protein_coding	KNOWN	PTPRD
18463	ENSG00000231535	18.3825	7.87488	234.733	2.502	3.14743	0.00164714	0.0245715	0	0	0	0	2.18594	0	2.36459	lincRNA	NOVEL	LINC00278
6661	ENSG00000137251	30.4159	7.87162	234.203	1.64774	4.77721	1.77744e-06	8.67389e-05	0	0	0	0.0146466	0.889225	0.0619957	1.7419	protein_coding	KNOWN	TINAG
19010	ENSG00000233878	18.3372	7.87035	233.998	1.71453	4.59039	4.42414e-06	0.000193656	0	0	0	0	0.133817	0.140302	1.0298	lincRNA	NOVEL	AC073133.1
29	ENSG00000002933	830.807	7.85717	231.869	2.22528	3.53086	0.000414204	0.00849683	0	0.26014	0	0	2.54651	0.332818	42.6751	protein_coding	KNOWN	TMEM176A
24105	ENSG00000267508	18.0775	7.85062	230.82	2.6565	2.95525	0.00312416	0.039789	0	0	0	0	0.0445002	0	0.46069	protein_coding	KNOWN	ZNF285
21325	ENSG00000250284	17.9842	7.84373	229.72	2.58293	3.03675	0.00239141	0.0325962	0	0	0	0	5.36732	0.750122	0	lincRNA	NOVEL	CTB-1I21.1
1785	ENSG00000091583	17.8236	7.83111	227.719	1.66521	4.70277	2.5665e-06	0.000121399	0	0	0	0	1.7097	0.702106	0.155332	protein_coding	KNOWN	APOH
6385	ENSG00000135697	89.6024	7.78774	220.975	1.44939	5.37313	7.73811e-08	5.64195e-06	0.0089648	0.0143667	0	0.0107725	5.19425	0.113994	0.524568	protein_coding	KNOWN	BCMO1
13247	ENSG00000184012	2153.03	7.78503	220.56	1.85069	4.20655	2.59302e-05	0.0008802	0	0.399129	0	0.00515995	21.0664	13.3375	32.7175	protein_coding	KNOWN	TMPRSS2
14880	ENSG00000198947	101.569	7.73775	213.45	1.67671	4.61484	3.93399e-06	0.000175952	0	0.00445207	0	0.00166914	0.138053	0.00471005	0.881563	protein_coding	KNOWN	DMD
22804	ENSG00000259342	16.655	7.7322	212.629	2.04032	3.78969	0.000150833	0.00372831	0	0	0	0	2.93341	0.0305443	1.41908	antisense	NOVEL	RP11-519G16.5
8647	ENSG00000154188	43.6823	7.71458	210.048	1.96309	3.92982	8.50107e-05	0.0023514	0	0.00295275	0.00440966	0	0.346763	0.821572	0	protein_coding	KNOWN	ANGPT1
13932	ENSG00000188175	124.964	7.69353	207.007	2.1274	3.61641	0.000298721	0.00657334	0	0	0.0506357	0.0127118	0	8.80628	0.785657	protein_coding	KNOWN	HEPACAM2
10593	ENSG00000167183	1864.34	7.67505	204.371	0.934555	8.21252	2.16598e-16	7.62549e-14	1.12399	0.0692797	0.206926	0.124674	92.8603	68.0903	72.9886	protein_coding	KNOWN	PRR15L
3906	ENSG00000114455	91.0031	7.67353	204.156	1.15216	6.66014	2.73566e-11	4.34953e-09	0.00724204	0	0	0.026107	2.31243	1.97067	0.497105	protein_coding	KNOWN	HHLA2
8124	ENSG00000148600	323.883	7.66058	202.332	2.08917	3.6668	0.000245603	0.00555798	0	0.0523904	0	0	2.05208	0.0145859	6.02145	protein_coding	KNOWN	CDHR1
9741	ENSG00000163501	419.007	7.65488	201.534	0.995566	7.68897	1.48321e-14	4.06135e-12	0.0129841	0.135251	0.0776868	0.0312046	10.2275	2.63063	26.6206	protein_coding	KNOWN	IHH
8963	ENSG00000157613	157.323	7.64066	199.558	1.35567	5.6361	1.73948e-08	1.49887e-06	0.0195196	0.0208543	0	0.00781853	0.0550353	4.60559	2.76757	protein_coding	KNOWN	CREB3L1
17066	ENSG00000225421	15.5331	7.63116	198.248	2.04966	3.72313	0.000196769	0.00463149	0	0	0	0	0.416452	0.0104343	0.969549	lincRNA	NOVEL	AC019330.1
11325	ENSG00000170956	15.1464	7.59868	193.835	1.79037	4.24419	2.19381e-05	0.000766868	0	0	0	0	0.0812052	0.766822	0.0960279	protein_coding	KNOWN	CEACAM3
16607	ENSG00000223400	14.7392	7.55536	188.101	1.9109	3.95383	7.69096e-05	0.00215872	0	0	0	0	3.77252	0.12871	4.2713	lincRNA	NOVEL	AP006748.1
26080	ENSG00000280623	40.8434	7.54837	187.191	2.20965	3.41609	0.000635272	0.0118067	0.0106972	0	0	0	0.424132	1.16072	0	NA	NA	NA
23609	ENSG00000263588	14.6358	7.54457	186.699	1.593	4.73609	2.17886e-06	0.00010386	0	0	0	0	2.5749	0.491541	3.13191	protein_coding	NOVEL	RP11-595B24.2
8845	ENSG00000156413	308.593	7.5356	185.541	1.19793	6.29052	3.16399e-10	4.23769e-08	0.048318	0.0193582	0.0216823	0.00725762	0.140489	9.73308	3.64285	protein_coding	KNOWN	FUT6
7764	ENSG00000145287	303.583	7.515	182.911	1.31091	5.73266	9.88682e-09	9.09145e-07	0.0204518	0.0163876	0.0571048	0.0163838	0.864952	13.9796	0.161097	protein_coding	KNOWN	PLAC8
3753	ENSG00000112936	14.3134	7.51305	182.665	1.72996	4.3429	1.40614e-05	0.000521096	0	0	0	0	0.037221	0.098054	0.390477	protein_coding	KNOWN	C7
3859	ENSG00000113924	335.145	7.50761	181.976	1.04366	7.19353	6.31376e-13	1.35301e-10	0.0264166	0.00705571	0.0421483	0.0846488	16.5814	1.61235	3.20048	protein_coding	KNOWN	HGD
8938	ENSG00000157399	325.556	7.49868	180.854	1.22179	6.13743	8.38658e-10	1.0033e-07	0.0456339	0.0877575	0.0109215	0.0109671	10.2867	0.239844	11.0198	protein_coding	KNOWN	ARSE
4690	ENSG00000121380	605.624	7.4854	179.197	0.888154	8.42805	3.51477e-17	1.41997e-14	0.0822124	0.0411721	0.0122974	0.0308719	4.19408	2.28243	16.0854	protein_coding	KNOWN	BCL2L14
6079	ENSG00000133710	13.7794	7.45902	175.95	2.22515	3.35215	0.000801871	0.0141354	0	0	0	0	0.557852	0.00508258	0.0404803	protein_coding	KNOWN	SPINK5
12671	ENSG00000180061	56.8141	7.42857	172.276	1.2108	6.13528	8.50087e-10	1.01206e-07	0.0153338	0	0.0366983	0	2.65887	0.597941	3.05409	protein_coding	KNOWN	TMEM150B
15227	ENSG00000204616	661.339	7.42119	171.396	0.938214	7.90991	2.57566e-15	7.55648e-13	0.0371526	0.0714473	0.115592	0.053573	24.009	1.25349	10.3514	protein_coding	KNOWN	TRIM31
18469	ENSG00000231561	36.9935	7.41558	170.731	1.29828	5.71187	1.11744e-08	1.01617e-06	0.0273329	0	0	0.0328443	2.13854	0.880476	4.30597	pseudogene	KNOWN	CEACAMP5
1767	ENSG00000091129	354.118	7.40966	170.031	1.83107	4.04663	5.19608e-05	0.00156735	0.00320601	0.0565163	0	0.00385248	6.98287	1.24203	0.00360764	protein_coding	KNOWN	NRCAM
10185	ENSG00000165188	161.128	7.40267	169.209	1.28232	5.77287	7.79347e-09	7.30275e-07	0.0144086	0.017318	0.00862098	0.025971	6.57361	0.0549646	1.7835	protein_coding	KNOWN	RNF183
18046	ENSG00000229719	79.9984	7.38677	167.355	1.1002	6.71405	1.89291e-11	3.08933e-09	0	0.0288555	0	0	0.951884	1.80112	1.42641	lincRNA	NOVEL	MIR194-2
7859	ENSG00000146039	13.0432	7.37893	166.449	2.07614	3.55415	0.000379198	0.00795428	0	0	0	0	0.0119889	0.0432551	0.484861	protein_coding	KNOWN	SLC17A4
4758	ENSG00000122176	34.2842	7.36199	164.506	1.71154	4.30138	1.69734e-05	0.00061658	0.00793561	0.00635866	0	0	0.0167808	1.60778	0.348259	protein_coding	KNOWN	FMOD
13500	ENSG00000185467	55.0636	7.35392	163.587	1.52557	4.82045	1.43236e-06	7.33869e-05	0.0152272	0	0	0.0365953	4.97484	0.154899	0.942409	protein_coding	KNOWN	KPNA7
12234	ENSG00000176907	104.086	7.34919	163.052	1.26324	5.81775	5.96451e-09	5.71943e-07	0	0.0794661	0	0	4.74853	1.81353	4.12911	protein_coding	KNOWN	C8orf4
23590	ENSG00000263400	21.063	7.3414	162.174	1.36385	5.38285	7.33146e-08	5.39333e-06	0	0.0100129	0	0	1.05698	0.264829	0.590585	antisense	NOVEL	CTC-297N7.5
13360	ENSG00000184730	125.094	7.31933	159.712	1.09914	6.65917	2.75388e-11	4.35042e-09	0	0.0333025	0.00828905	0.00832368	0.62253	4.26897	1.38745	protein_coding	KNOWN	APOBR
2240	ENSG00000101049	542.671	7.31675	159.427	0.735323	9.95039	2.51197e-23	1.67311e-20	0.0480418	0.0288713	0.0143722	0.108242	11.0416	3.92494	8.63611	protein_coding	KNOWN	SGK2
5158	ENSG00000125780	50.9687	7.31266	158.975	1.01607	7.19702	6.15421e-13	1.34244e-10	0.0195075	0	0	0.0117205	1.2994	1.45524	0.845124	protein_coding	KNOWN	TGM3
16025	ENSG00000214313	58.8319	7.29704	157.263	1.40943	5.17731	2.25112e-07	1.41162e-05	0	0.0485237	0	0	0.384168	2.73362	3.33905	pseudogene	KNOWN	AZGP1P1
21232	ENSG00000249743	32.7286	7.29068	156.572	1.81731	4.0118	6.02573e-05	0.00175946	0	0.0140878	0.0210389	0	0.185891	0.0447124	3.93703	lincRNA	NOVEL	RP11-60A8.1
7508	ENSG00000143416	2282.63	7.27369	154.738	1.49054	4.87991	1.06133e-06	5.63695e-05	0.202399	0.852939	0	0.00900782	19.5372	46.7958	57.5795	protein_coding	KNOWN	SELENBP1
23393	ENSG00000261650	19.6665	7.24118	151.291	1.31291	5.51538	3.4802e-08	2.75775e-06	0	0.0364769	0	0	1.92528	1.19631	3.38091	lincRNA	NOVEL	RP11-474D1.4
5661	ENSG00000130600	5299.23	7.2358	150.728	1.20037	6.02799	1.66012e-09	1.80229e-07	1.37611	0.409768	1.02363	0.346359	20.3204	330.739	5.66037	processed_transcript	KNOWN	H19
20304	ENSG00000241186	638.69	7.21577	148.65	1.6778	4.30074	1.70232e-05	0.000616846	0.00873815	0.350086	0	0	11.9829	5.30373	23.1169	protein_coding	KNOWN	TDGF1
24659	ENSG00000271298	11.6398	7.2152	148.591	2.60662	2.76803	0.0056396	0.0607706	0	0	0	0	3.02969	0	7.12064	pseudogene	KNOWN	RP5-1012F16.2
23375	ENSG00000261583	11.5772	7.20585	147.631	1.62248	4.44126	8.94349e-06	0.000353211	0	0	0	0	1.19618	0.416981	2.54614	antisense	NOVEL	CTD-2385L22.1
26208	ENSG00000283526	11.5301	7.20394	147.436	1.53767	4.68496	2.80013e-06	0.000130694	0	0	0	0	0.804377	0.678865	0.202756	NA	NA	NA
18392	ENSG00000231221	19.1418	7.20284	147.323	1.6984	4.24094	2.22581e-05	0.000773666	0	0.0542453	0	0	0.357889	1.43472	7.61788	lincRNA	NOVEL	AC023672.2
15174	ENSG00000204397	11.5314	7.20235	147.273	2.57769	2.79411	0.00520424	0.0573584	0	0	0	0	0	0.382545	0.928046	protein_coding	KNOWN	CARD16
23161	ENSG00000260725	18.9915	7.1943	146.454	1.43573	5.0109	5.41774e-07	3.13415e-05	0	0.0134058	0	0	1.07905	1.02115	0.20709	lincRNA	NOVEL	AC005307.1
7198	ENSG00000140968	1207.19	7.19318	146.34	2.05343	3.503	0.000460053	0.00923254	0	0.403656	0	0	14.5963	12.1212	17.7447	protein_coding	KNOWN	IRF8
10583	ENSG00000167117	88.3329	7.18753	145.768	1.14752	6.26355	3.76321e-10	4.88108e-08	0.0143417	0.0172376	0	0.00861682	2.50958	0.188444	1.88819	processed_transcript	KNOWN	LINC00483
5830	ENSG00000131771	4371.86	7.18389	145.401	1.0977	6.5445	5.96945e-11	8.86211e-09	1.39582	0.0693253	0.0690208	0.138618	66.3568	43.7904	72.3552	protein_coding	KNOWN	PPP1R1B
14114	ENSG00000189229	11.3637	7.18055	145.065	2.81284	2.55278	0.0106868	0.0943289	0	0	0	0	0.0367478	0	0.684425	lincRNA	NOVEL	AC069277.2
19716	ENSG00000236935	83.1418	7.17655	144.663	1.3426	5.34528	9.02793e-08	6.43018e-06	0.0390876	0	0.0467739	0.140908	4.83533	0.596432	18.0775	antisense	NOVEL	AP003774.1
24071	ENSG00000267365	18.7497	7.1749	144.498	1.82353	3.93461	8.33305e-05	0.00232045	0	0.00861882	0	0	0.0113727	0.811525	0.641499	antisense	KNOWN	KCNJ2-AS1
14187	ENSG00000196228	66.8224	7.17487	144.495	1.35862	5.28099	1.28488e-07	8.74715e-06	0	0.115012	0	0	1.3962	8.6877	3.81177	protein_coding	KNOWN	SULT1C3
17135	ENSG00000225706	11.3003	7.17284	144.291	1.36472	5.25592	1.47288e-07	9.94455e-06	0	0	0	0	0.367475	0.24106	0.260731	lincRNA	NOVEL	RP11-75C9.1
672	ENSG00000054219	127.78	7.16646	143.654	1.17014	6.12442	9.10155e-10	1.06809e-07	0	0.00478453	0.00714528	0.0143503	0.138892	0.541611	2.07957	protein_coding	KNOWN	LY75
13688	ENSG00000186474	73.2011	7.12834	139.909	1.23175	5.78715	7.15924e-09	6.75986e-07	0.0148484	0.0237956	0	0.035685	4.09753	3.54959	0.217211	protein_coding	KNOWN	KLK12
17465	ENSG00000227166	10.9068	7.12324	139.415	1.88029	3.78837	0.00015164	0.00374451	0	0	0	0	0.0482575	0.947934	0.821752	pseudogene	KNOWN	STSP1
10101	ENSG00000164822	243.761	7.11828	138.936	3.50303	2.03204	0.0421499	0.228732	0	0.942411	0	0	0	74.2543	24.5156	protein_coding	KNOWN	DEFA6
6495	ENSG00000136250	413.899	7.11477	138.599	1.55213	4.58389	4.56402e-06	0.000199072	0.0224631	0.00599976	0	0.188949	13.7198	0.22216	8.47626	protein_coding	KNOWN	AOAH
10720	ENSG00000167757	460.772	7.09146	136.377	1.56115	4.54245	5.56033e-06	0.000235444	0.109691	0.0338053	0	0.13181	16.219	11.8737	0.0284845	protein_coding	KNOWN	KLK11
6719	ENSG00000137648	2520.53	7.07482	134.814	0.836802	8.4546	2.8005e-17	1.15026e-14	0.303648	0.0359672	0.0315964	0.104704	17.9397	12.5592	17.634	protein_coding	KNOWN	TMPRSS4
25782	ENSG00000279193	10.4342	7.0612	133.547	1.81858	3.88281	0.000103258	0.00275996	0	0	0	0	0.105799	1.37842	0.422248	NA	NA	NA
10291	ENSG00000165794	141.295	7.05715	133.172	1.663	4.24361	2.19949e-05	0.000767764	0.116742	0.0133633	0	0.0400805	13.9302	0.0141376	3.09649	protein_coding	KNOWN	SLC39A2
9662	ENSG00000163131	1364.19	7.05582	133.05	1.70253	4.14432	3.40825e-05	0.00110809	0.0869764	0.502782	0.0223028	0	10.7003	0.205394	50.3832	protein_coding	KNOWN	CTSS
22304	ENSG00000256643	10.4183	7.05422	132.902	1.41801	4.97472	6.53422e-07	3.69333e-05	0	0	0	0	1.40873	0.766429	1.44574	lincRNA	NOVEL	RP11-349K16.1
25843	ENSG00000279427	10.3674	7.04717	132.254	1.92765	3.65583	0.000256353	0.00576946	0	0	0	0	0.158021	0.316739	2.3545	NA	NA	NA
21182	ENSG00000249464	17.2033	7.04556	132.106	1.24033	5.68037	1.34401e-08	1.18716e-06	0.00337664	0	0	0	0.124955	0.117359	0.178583	lincRNA	NOVEL	RP11-93L9.1
4160	ENSG00000116299	1339.35	7.0439	131.955	1.32745	5.30634	1.11851e-07	7.76467e-06	0.0960294	0.108631	0.0304181	0.040727	0.02389	15.7735	11.556	protein_coding	KNOWN	KIAA1324
6166	ENSG00000134323	70.3468	7.01654	129.476	1.45861	4.81044	1.50602e-06	7.65245e-05	0	0.0485331	0	0	3.39414	1.36921	0.374863	protein_coding	KNOWN	MYCN
12209	ENSG00000176728	10.1322	7.01514	129.35	2.61207	2.68566	0.00723863	0.0724275	0	0	0	0	0.317249	0	0.282889	lincRNA	KNOWN	TTTY14
17055	ENSG00000225366	163.928	6.98873	127.004	1.60592	4.35187	1.34983e-05	0.000504018	0	0.116497	0	0	3.1359	1.37216	6.98034	pseudogene	KNOWN	TDGF1P3
3792	ENSG00000113303	9.86849	6.9773	126.002	2.65938	2.62365	0.00869923	0.0819693	0	0	0	0	0	0.0907922	0.391688	protein_coding	KNOWN	BTNL8
5934	ENSG00000132554	16.3023	6.96574	124.996	2.00549	3.47334	0.000514024	0.0100377	0	0	0	0.00496046	0.453922	0.0279953	0.0046452	protein_coding	KNOWN	RGS22
21426	ENSG00000250786	521.981	6.9619	124.664	2.0482	3.39903	0.000676253	0.0124	0	0.539394	0	0	32.9964	1.46087	16.3316	lincRNA	NOVEL	SNHG18
19873	ENSG00000237721	102.293	6.95577	124.135	1.53314	4.53694	5.70773e-06	0.000240858	0	0.3308	0	0.0620106	6.43834	0.831177	30.893	lincRNA	NOVEL	AF064858.11
25420	ENSG00000276122	95.8805	6.93201	122.108	1.70839	4.05764	4.95716e-05	0.00151381	0	0.091245	0	0	1.39128	7.07904	0.298991	NA	NA	NA
18162	ENSG00000230215	9.47105	6.92014	121.107	2.67711	2.58493	0.00973996	0.0885732	0	0	0	0	0	2.61274	0.569407	antisense	NOVEL	EIF2B5-AS1
3384	ENSG00000109819	158.932	6.91434	120.621	1.13759	6.07808	1.21627e-09	1.38127e-07	0.00241646	0.0212989	0.00578327	0	0.597855	1.91122	0.266479	protein_coding	KNOWN	PPARGC1A
10214	ENSG00000165376	1962.81	6.91135	120.372	1.35911	5.08519	3.67253e-07	2.19143e-05	0.93205	0.0370331	0.0645233	0.175866	0.773712	41.0532	67.3926	protein_coding	KNOWN	CLDN2
12117	ENSG00000176046	908.187	6.90878	120.158	0.759112	9.10113	8.93933e-20	4.31962e-17	0.162027	0.0630599	0.0110793	0.100131	12.1779	11.7338	6.45949	protein_coding	KNOWN	NUPR1
16923	ENSG00000224817	9.2711	6.88822	118.457	2.61372	2.6354	0.00840372	0.0803439	0	0	0	0	4.19923	1.91295	0	lincRNA	NOVEL	RP11-190J1.3
6550	ENSG00000136689	336.375	6.8783	117.645	1.46407	4.69808	2.62623e-06	0.000123749	0.137143	0.0452488	0	0.0387757	18.2617	1.04632	0.29049	protein_coding	KNOWN	IL1RN
4995	ENSG00000124429	2540.67	6.87539	117.409	1.54697	4.44442	8.81275e-06	0.000350293	1.2061	0.135822	0.00780146	0.00783405	55.31	3.82443	60.4866	protein_coding	KNOWN	POF1B
13577	ENSG00000185860	14.9066	6.83561	114.215	2.23425	3.05946	0.00221734	0.0307779	0	0	0	0.00731312	0.54695	0.108342	0	protein_coding	KNOWN	C1orf110
5545	ENSG00000129538	882.757	6.81188	112.352	0.953203	7.14631	8.91436e-13	1.81558e-10	0.12209	0.768655	0.0208712	0.39821	53.313	31.3746	26.4564	protein_coding	KNOWN	RNASE1
4061	ENSG00000115590	455.869	6.79768	111.251	1.31532	5.16809	2.36502e-07	1.47553e-05	0.222238	0.0821888	0	0.0308136	23.2082	1.4347	3.48187	protein_coding	KNOWN	IL1R2
2981	ENSG00000106178	447.7	6.79709	111.206	2.04848	3.31812	0.00090627	0.0154348	0	1.63738	0	0	110.188	6.06292	21.3177	protein_coding	KNOWN	CCL24
6297	ENSG00000135220	8.69541	6.79414	110.979	1.95064	3.48304	0.000495761	0.00979755	0	0	0	0	0.0181399	0.130896	0.395772	protein_coding	KNOWN	UGT2A3
11405	ENSG00000171431	3046.07	6.77746	109.703	1.54377	4.3902	1.13245e-05	0.000432015	2.0063	0.307841	0	1.48755	154.507	2.83461	155.424	protein_coding	KNOWN	KRT20
25694	ENSG00000278912	14.2621	6.76851	109.025	1.4492	4.67053	3.00422e-06	0.000139428	0	0	0	0.0485591	1.79451	0.411079	1.95533	NA	NA	NA
5360	ENSG00000127831	7988.68	6.7678	108.971	1.72354	3.92668	8.61257e-05	0.00237946	0.00379579	2.64002	0.022711	0.00912237	68.985	55.313	94.5025	protein_coding	KNOWN	VIL1
4971	ENSG00000124233	8.49716	6.76004	108.386	2.08672	3.23956	0.00119716	0.0190586	0	0	0	0	0.0334202	0.0937831	0.853643	protein_coding	KNOWN	SEMG1
6780	ENSG00000137960	596.856	6.75024	107.653	0.696462	9.69219	3.25475e-22	1.90976e-19	0.0595021	0.0582731	0.11076	0.127112	2.75415	13.86	11.8512	protein_coding	KNOWN	GIPC2
3303	ENSG00000108984	477.722	6.74784	107.474	1.11632	6.04471	1.49683e-09	1.656e-07	0.00857694	0.151196	0.0102635	0.0103064	2.0404	6.5946	6.14794	protein_coding	KNOWN	MAP2K6
22138	ENSG00000255474	44.4804	6.74009	106.898	1.01351	6.65023	2.9263e-11	4.56428e-09	0.0210303	0.0337024	0.0251658	0	1.53425	1.33708	3.88103	lincRNA	NOVEL	RP11-234B24.2
14592	ENSG00000197921	38.8768	6.73879	106.802	1.73805	3.87722	0.000105656	0.00280882	0	0.064463	0	0	1.02072	4.5352	0.090528	protein_coding	KNOWN	HES5
16005	ENSG00000214252	13.8944	6.73875	106.799	1.66457	4.04833	5.15836e-05	0.00155891	0	0.0610063	0	0	0.241497	2.9689	4.45503	pseudogene	KNOWN	AZGP1P2
9676	ENSG00000163209	13.9218	6.73863	106.789	2.27714	2.95925	0.00308387	0.0394595	0.0182282	0	0	0	1.61892	0.216332	0	protein_coding	KNOWN	SPRR3
12243	ENSG00000176945	459.597	6.73787	106.734	1.19245	5.65044	1.60041e-08	1.39513e-06	0.117456	0.0346741	0	0.103998	6.19629	0.859438	13.4396	protein_coding	KNOWN	MUC20
1471	ENSG00000083622	8.33407	6.73194	106.296	1.65463	4.06854	4.73094e-05	0.00145373	0	0	0	0	2.36359	0.473761	1.41498	antisense	NOVEL	AC000111.6
3872	ENSG00000114113	42.9836	6.73139	106.255	1.19319	5.64152	1.68557e-08	1.45752e-06	0.0621701	0.0498158	0	0	5.06144	0.737834	3.84771	protein_coding	KNOWN	RBP2
17675	ENSG00000228079	8.30047	6.72757	105.974	1.8495	3.63751	0.000275281	0.00614495	0	0	0	0	2.1821	0.397621	0.263905	lincRNA	NOVEL	AC012368.1
22868	ENSG00000259549	8.19627	6.70723	104.491	1.57873	4.24851	2.152e-05	0.000754394	0	0	0	0	0.757423	0.371113	1.25395	antisense	NOVEL	RP11-115K3.1
8138	ENSG00000148735	112.456	6.69941	103.926	1.46542	4.57167	4.83852e-06	0.000209194	0.0388995	0	0	0.0116858	0.951102	0.119537	2.87257	protein_coding	KNOWN	PLEKHS1
6734	ENSG00000137747	592.638	6.69451	103.573	1.3657	4.90187	9.49277e-07	5.13026e-05	0.181083	0.0117648	0.0175696	0.0588101	17.4643	0.124465	3.32638	protein_coding	KNOWN	TMPRSS13
18766	ENSG00000232806	8.07971	6.68683	103.023	1.79602	3.72313	0.000196765	0.00463149	0	0	0	0	1.71108	0.21106	1.75103	lincRNA	NOVEL	AP001610.9
11644	ENSG00000172824	13.3712	6.67777	102.379	2.17321	3.07277	0.00212085	0.0298329	0	0	0	0.00727267	0	0.338619	0.245176	protein_coding	KNOWN	CES4A
3994	ENSG00000115221	779.78	6.66789	101.68	1.00199	6.65465	2.83972e-11	4.45746e-09	0.103299	0.168854	0.00494448	0.0248257	13.6043	5.20504	4.42175	protein_coding	KNOWN	ITGB6
8656	ENSG00000154269	208.322	6.66382	101.393	1.17058	5.69273	1.25023e-08	1.12038e-06	0.0405666	0.0433404	0.00809063	0.0406221	0.321685	0.756555	9.07644	protein_coding	KNOWN	ENPP3
8066	ENSG00000148123	19.9688	6.64367	99.9871	1.9678	3.3762	0.000734952	0.0132399	0	0.011473	0	0	0.00756941	0.904266	0.12084	protein_coding	KNOWN	LPPR1
17305	ENSG00000226453	29.8236	6.61641	98.1158	1.20882	5.47347	4.41316e-08	3.38522e-06	0.0319548	0.0512097	0	0	3.68268	0.785568	2.40918	lincRNA	NOVEL	RP11-379B8.1
5606	ENSG00000130234	44.569	6.61241	97.8441	1.56438	4.22685	2.36984e-05	0.000816817	0	0.0268049	0	0	1.71189	0.153134	0.286088	protein_coding	KNOWN	ACE2
3462	ENSG00000110680	26.9445	6.6035	97.2413	1.83121	3.60608	0.000310861	0.0067556	0	0.0296718	0	0	0.0261017	0.387157	1.98623	protein_coding	KNOWN	CALCA
9038	ENSG00000158315	108.717	6.60037	97.0309	1.22638	5.38201	7.3659e-08	5.40254e-06	0.0281934	0.0376515	0.0112458	0.0225856	6.59775	0.183233	0.58163	protein_coding	KNOWN	RHBDL2
6346	ENSG00000135472	892.809	6.58827	96.2203	1.64811	3.99747	6.40244e-05	0.0018454	0.00433661	0.364859	0.0155681	0	1.12336	12.8336	13.9369	protein_coding	KNOWN	FAIM2
11350	ENSG00000171124	1238.91	6.58403	95.9378	1.69148	3.89246	9.92327e-05	0.00267559	0.743482	0	0	0.304568	9.4956	40.4082	25.4979	protein_coding	KNOWN	FUT3
17388	ENSG00000226812	35.2629	6.57407	95.2779	1.57008	4.18709	2.82553e-05	0.000943901	0	0.0929235	0	0	0.551765	0.884773	5.93758	antisense	NOVEL	RP5-881L22.5
12870	ENSG00000181634	625.749	6.56053	94.3881	1.04535	6.27593	3.4755e-10	4.58023e-08	0.0499434	0.12806	0	0.0320075	3.92169	7.63489	3.45067	protein_coding	KNOWN	TNFSF15
11344	ENSG00000171102	12.2502	6.55741	94.1843	2.27959	2.87658	0.00402015	0.0477462	0	0.0185438	0	0	0	1.76565	0.286459	protein_coding	KNOWN	OBP2B
3860	ENSG00000113946	12.2807	6.55699	94.1568	1.69314	3.87268	0.000107647	0.00284947	0	0.00587418	0	0	0.0387555	0.0932185	0.519708	protein_coding	KNOWN	CLDN16
7105	ENSG00000140297	2373.1	6.55189	93.8241	1.43511	4.56543	4.98478e-06	0.000214389	0.600386	0.0195032	0.0194175	0.346101	41.3387	27.6005	0.388012	protein_coding	KNOWN	GCNT3
601	ENSG00000048740	759.788	6.54333	93.2691	1.2376	5.28711	1.24267e-07	8.50674e-06	0.00957073	0.00383443	0.168928	0.0057503	5.21898	3.22096	4.64981	protein_coding	KNOWN	CELF2
23841	ENSG00000266010	78.6634	6.54107	93.1235	1.50687	4.34084	1.41938e-05	0.000524425	0	0	0.0689678	0.051942	5.21014	0.109929	2.83738	lincRNA	NOVEL	GATA6-AS1
10048	ENSG00000164588	225.439	6.54071	93.0998	1.84063	3.55352	0.000380111	0.00795876	0.0383346	0.00153584	0.00229364	0.00230323	0	0.555695	2.55586	protein_coding	KNOWN	HCN1
5848	ENSG00000131910	63.5966	6.53976	93.039	1.61822	4.04133	5.3149e-05	0.00159538	0	0.0910345	0.0543808	0	0.0720731	1.618	8.71892	protein_coding	KNOWN	NR0B2
7061	ENSG00000139874	142.426	6.53539	92.7575	1.87104	3.49292	0.000477764	0.00951052	0	0.088207	0	0	0.116391	4.20969	1.94755	protein_coding	KNOWN	SSTR1
299	ENSG00000013016	41.5089	6.52982	92.3999	1.70706	3.82518	0.000130678	0.00333378	0.0113317	0	0	0.0136167	0.293537	1.39287	0.00637562	protein_coding	KNOWN	EHD3
3328	ENSG00000109182	12.0173	6.52707	92.2242	2.41816	2.69919	0.00695088	0.0705896	0	0.00670719	0	0	0.690322	0	0.0376767	protein_coding	KNOWN	CWH43
11685	ENSG00000173080	163.839	6.52229	91.9187	1.11292	5.86054	4.61372e-09	4.51192e-07	0.0423659	0.186709	0	0.127272	6.87585	1.45452	16.6618	protein_coding	KNOWN	RXFP4
20483	ENSG00000242613	7.13741	6.51045	91.1675	2.68553	2.42427	0.0153394	0.121239	0	0	0	0	0	1.66278	2.783	pseudogene	KNOWN	RP11-174O3.4
145	ENSG00000006747	33.7074	6.50454	90.7952	1.54017	4.22326	2.40796e-05	0.000827641	0	0.00724328	0	0	0.0238942	0.16667	0.358564	protein_coding	KNOWN	SCIN
24328	ENSG00000269416	162.427	6.47082	88.6976	1.37711	4.69884	2.61645e-06	0.000123525	0.00796932	0.127713	0	0	2.94911	2.074	4.29551	lincRNA	NOVEL	CTB-175P5.4
9335	ENSG00000160862	1186.09	6.46674	88.4469	1.12896	5.72805	1.01592e-08	9.30715e-07	0.389283	0.717429	0.0116458	0.128639	5.53591	34.9801	42.5455	protein_coding	KNOWN	AZGP1
9529	ENSG00000162594	25.892	6.46348	88.2471	1.30351	4.95851	7.10363e-07	3.97019e-05	0	0.0193271	0	0	0.552553	0.197654	0.750922	protein_coding	KNOWN	IL23R
11498	ENSG00000171916	6.85904	6.45194	87.5442	2.84248	2.26983	0.0232181	0.159739	0	0	0	0	0	0.0281028	0.248695	protein_coding	KNOWN	LGALS9C
11897	ENSG00000174562	77.2894	6.44545	87.1513	1.23484	5.21967	1.7924e-07	1.16548e-05	0.0344258	0.0459746	0	0.0137892	0.181993	1.52725	4.67443	protein_coding	KNOWN	KLK15
20674	ENSG00000244122	6.77813	6.43654	86.615	1.8492	3.48072	0.000500072	0.00985115	0	0	0	0	0.199944	0.0908412	0.0212796	protein_coding	KNOWN	UGT1A7
26157	ENSG00000282890	6.72721	6.42221	85.7589	1.84444	3.48194	0.000497795	0.00982199	0	0	0	0	0.0617617	0.0660246	0.350569	NA	NA	NA
18167	ENSG00000230234	6.62897	6.40281	84.6133	2.81321	2.27598	0.022847	0.15798	0	0	0	0	0	0.381444	2.34181	lincRNA	NOVEL	RP1-276N6.2
14162	ENSG00000196139	457.917	6.40193	84.5615	1.04187	6.14465	8.01384e-10	9.68103e-08	0.150693	0.0185765	0.00693559	0.125362	11.5268	5.62566	1.93049	protein_coding	KNOWN	AKR1C3
15809	ENSG00000213606	18.6243	6.39416	84.1075	1.68154	3.80256	0.000143209	0.00358298	0.0278842	0	0.0333674	0	3.00718	0.661858	0.0627545	pseudogene	KNOWN	AKR1B10P1
13643	ENSG00000186198	31.616	6.38519	83.5863	1.78659	3.57395	0.000351641	0.00748992	0.0279435	0.0671718	0	0	6.02715	0.0473761	0.282996	protein_coding	KNOWN	SLC51B
25360	ENSG00000275512	6.50338	6.37493	82.9934	2.12462	3.00051	0.00269532	0.0355206	0	0	0	0	0.416637	0.0175814	0.0583446	NA	NA	NA
9039	ENSG00000158321	906.726	6.37433	82.9591	1.63741	3.89293	9.90392e-05	0.0026733	0	0.206028	0.0573138	0	8.37963	2.94255	5.10872	protein_coding	KNOWN	AUTS2
16117	ENSG00000214860	6.49486	6.37355	82.9143	2.46608	2.58448	0.00975247	0.0886209	0	0	0	0	0.553898	0.0103278	0.0137094	protein_coding	KNOWN	EVPLL
21192	ENSG00000249510	6.48627	6.37339	82.9052	1.50963	4.22183	2.42326e-05	0.000831737	0	0	0	0	0.533439	0.534617	0.425797	pseudogene	KNOWN	KB-1247B1.1
14766	ENSG00000198681	6.44094	6.36467	82.4058	2.97011	2.14291	0.0321205	0.194568	0	0	0	0	0.0324821	0.69014	0	protein_coding	KNOWN	MAGEA1
21614	ENSG00000251685	6.44094	6.36467	82.4058	2.97011	2.14291	0.0321205	0.194568	0	0	0	0	0.0342866	0.728481	0	pseudogene	KNOWN	RP11-813N20.1
10667	ENSG00000167580	6.40018	6.35512	81.862	1.529	4.15638	3.2333e-05	0.00106242	0	0	0	0	0.0838649	0.118963	0.0823899	protein_coding	KNOWN	AQP2
10095	ENSG00000164794	64.6783	6.34539	81.3115	1.56035	4.06665	4.76943e-05	0.00146373	0	0.0271421	0	0	0.433754	1.17731	0.139761	protein_coding	KNOWN	KCNV1
24818	ENSG00000272168	30.7187	6.33241	80.5834	1.6591	3.81677	0.000135208	0.00342805	0.00197659	0.00475141	0	0	0.380355	0.051943	0.0044484	lincRNA	KNOWN	CASC15
19129	ENSG00000234378	6.30848	6.33149	80.5318	2.81066	2.25267	0.02428	0.164203	0	0	0	0	1.26576	0	0.35659	lincRNA	NOVEL	AC098828.2
11319	ENSG00000170927	38.3987	6.32254	80.0342	1.79385	3.52457	0.000424167	0.00864612	0.00300984	0.0036176	0	0	0.394609	0.0191361	0.00169344	protein_coding	KNOWN	PKHD1
17627	ENSG00000227907	6.26216	6.32042	79.9165	1.55709	4.05911	4.92597e-05	0.00150615	0	0	0	0	1.16741	0.640416	0.850102	antisense	NOVEL	RP11-102C16.3
21241	ENSG00000249803	6.2547	6.31967	79.8751	2.90821	2.17304	0.0297771	0.186947	0	0	0	0	1.38861	0.111334	0	lincRNA	NOVEL	RP11-114H21.2
22890	ENSG00000259649	17.5354	6.31502	79.6179	1.4983	4.21479	2.50016e-05	0.000853377	0.0353049	0	0	0.0424239	3.09824	1.10735	0.238366	protein_coding	NOVEL	RP11-351M8.1
1404	ENSG00000081138	6.19205	6.30982	79.3314	1.74571	3.61447	0.00030096	0.00659864	0	0	0	0	0.0133777	0.0520968	0.0162716	protein_coding	KNOWN	CDH7
8657	ENSG00000154274	155.62	6.29738	78.65	0.913885	6.89077	5.54909e-12	9.90954e-10	0.0379305	0.060786	0.034042	0.0455789	0.421094	5.18487	4.99381	protein_coding	KNOWN	C4orf19
3816	ENSG00000113532	32.8481	6.28791	78.1357	1.32219	4.75569	1.97772e-06	9.57544e-05	0	0.00540086	0.00806571	0	0.0427593	0.539957	0.21237	protein_coding	KNOWN	ST8SIA4
26242	ENSG00000284377	6.09822	6.28684	78.078	2.08299	3.01819	0.00254294	0.0339664	0	0	0	0	0.239733	0.517488	0.0196264	NA	NA	NA
18634	ENSG00000232298	6.05177	6.27163	77.2587	1.98912	3.15296	0.00161622	0.0242571	0	0	0	0	1.07066	0.182088	0.103589	antisense	NOVEL	RP11-10N16.3
22477	ENSG00000257766	5.98635	6.25719	76.4895	1.95957	3.19315	0.00140732	0.0218125	0	0	0	0	1.66158	0.6661	0.126314	antisense	NOVEL	RP11-341G23.3
17586	ENSG00000227683	5.94295	6.24453	75.8214	2.07314	3.01212	0.00259429	0.0345028	0	0	0	0	1.66114	0.0832403	0.386732	lincRNA	NOVEL	RP11-445N18.5
11595	ENSG00000172482	23.6409	6.23816	75.4874	1.06148	5.87687	4.18106e-09	4.17158e-07	0	0.00944031	0.00704913	0	0.342559	0.419468	0.238633	protein_coding	KNOWN	AGXT
24208	ENSG00000268238	15.1848	6.23412	75.2763	1.7998	3.46378	0.000532641	0.0103195	0	0.127559	0	0	6.56433	1.95678	0.179136	pseudogene	KNOWN	IGFL1P2
14714	ENSG00000198488	5.89458	6.23307	75.2211	2.96949	2.09904	0.0358136	0.207897	0	0	0	0	0	0.0254381	0.405204	protein_coding	KNOWN	B3GNT6
15296	ENSG00000204983	78.7921	6.22078	74.5832	1.37252	4.53239	5.83193e-06	0.00024526	0.0420046	0.0785342	0	0.0168248	0.740197	6.99101	0.189066	protein_coding	KNOWN	PRSS1
11406	ENSG00000171433	9.72979	6.21812	74.4459	1.35203	4.59909	4.2433e-06	0.000187405	0	0.0198371	0	0	0.81144	0.398745	0.529303	protein_coding	KNOWN	GLOD5
19945	ENSG00000237986	5.83513	6.21704	74.3903	1.63509	3.80227	0.000143377	0.00358355	0	0	0	0	0.294197	0.141526	0.354856	antisense	NOVEL	CELF2-AS2
6551	ENSG00000136695	9.69186	6.21349	74.2072	2.45683	2.52907	0.0114366	0.0985536	0	0.00637986	0	0	0.530357	0	0.0268785	protein_coding	KNOWN	IL36RN
23032	ENSG00000260197	5.79379	6.20697	73.8729	2.11336	2.93701	0.00331389	0.0414428	0	0	0	0	0.197926	0.00835213	0.210649	lincRNA	NOVEL	RP11-424G14.1
6590	ENSG00000136872	61.3517	6.20088	73.5613	1.62675	3.81181	0.000137954	0.00347622	0.0107168	0	0.0641209	0.0128778	0.0339929	4.4152	0.265305	protein_coding	KNOWN	ALDOB
2831	ENSG00000105398	5.77283	6.20083	73.5589	1.90245	3.2594	0.00111649	0.0180544	0	0	0	0	0.125792	0.0448249	0.38676	protein_coding	KNOWN	SULT2A1
14629	ENSG00000198074	276.105	6.19467	73.2454	1.18218	5.24004	1.60541e-07	1.06354e-05	0.12049	0.0120683	0.252322	0.162885	23.3293	5.83482	0.660974	protein_coding	KNOWN	AKR1B10
9848	ENSG00000163833	16.063	6.19365	73.1941	1.22212	5.06794	4.02143e-07	2.38231e-05	0	0	0.00530141	0.00532356	0.210786	0.108912	0.189438	protein_coding	KNOWN	FBXO40
2333	ENSG00000101460	211.695	6.18805	72.9101	0.949692	6.51585	7.2281e-11	1.06029e-08	0.0745371	0.274736	0.0535166	0	5.87913	9.70539	7.06224	protein_coding	KNOWN	MAP1LC3A
12888	ENSG00000181800	5.67332	6.1774	72.374	1.76283	3.50425	0.000457895	0.009204	0	0	0	0	0.27007	0.0631554	0.107786	antisense	KNOWN	CELF2-AS1
8939	ENSG00000157404	148.725	6.16815	71.9114	1.7622	3.50026	0.000464801	0.0092984	0.00472171	0.0870187	0	0	1.30299	3.68645	0.0478189	protein_coding	KNOWN	KIT
18967	ENSG00000233681	23.7558	6.16734	71.871	1.09027	5.6567	1.54308e-08	1.35329e-06	0.0253786	0	0.0303692	0.030496	0.992822	1.01115	2.31319	pseudogene	KNOWN	CEACAMP1
21788	ENSG00000253687	5.63169	6.16543	71.776	1.73254	3.5586	0.00037284	0.00784651	0	0	0	0	0.607872	0.182764	0.687381	antisense	NOVEL	CTC-348L5.1
25195	ENSG00000274002	24.0475	6.16293	71.6516	1.28821	4.78409	1.71767e-06	8.44916e-05	0.0323484	0	0	0.0777424	0.513033	1.78244	3.27606	NA	NA	NA
829	ENSG00000064692	136.771	6.15969	71.4909	1.17407	5.24645	1.55058e-07	1.03277e-05	0.0537888	0.00287333	0	0.00861799	0.841696	2.02149	0.653692	protein_coding	KNOWN	SNCAIP
24226	ENSG00000268442	19.5942	6.15626	71.3212	2.01153	3.06049	0.00220975	0.0307146	0	0.0597931	0	0	3.26113	0.21086	0.0279899	pseudogene	KNOWN	HAVCR1P1
12281	ENSG00000177191	119.483	6.13946	70.4955	0.98321	6.2443	4.25709e-10	5.49276e-08	0.0420494	0.112311	0	0.0673712	1.46715	2.48333	8.05967	protein_coding	KNOWN	B3GNT8
10851	ENSG00000168350	1302.19	6.13036	70.0521	1.09338	5.60678	2.0613e-08	1.74566e-06	0.435233	0.367595	0	0.240295	17.6856	19.4398	17.7702	protein_coding	KNOWN	DEGS2
22686	ENSG00000258837	37.0215	6.12936	70.0038	1.22745	4.99359	5.92672e-07	3.3967e-05	0.0489141	0.078388	0	0.117555	2.53415	0.704908	9.74238	antisense	NOVEL	CTD-2566J3.1
25900	ENSG00000279668	5.44353	6.11914	69.5098	3.03908	2.01348	0.0440638	0.23474	0	0	0	0	0.142726	0.0063574	0	NA	NA	NA
23660	ENSG00000264177	5.42414	6.11355	69.2408	2.31894	2.63636	0.00838013	0.0802019	0	0	0	0	0.190566	0.0134814	0.00596516	antisense	NOVEL	RP1-37N7.1
3968	ENSG00000115009	44.8594	6.11189	69.1613	0.995464	6.13974	8.26542e-10	9.93625e-08	0.0977918	0	0	0.0235022	2.23335	2.13881	1.91474	protein_coding	KNOWN	CCL20
7017	ENSG00000139540	197.391	6.10097	68.6397	0.850448	7.17384	7.29249e-13	1.53604e-10	0.0361927	0.101502	0.0757922	0.0326181	4.05629	0.912762	7.8297	protein_coding	KNOWN	SLC39A5
6552	ENSG00000136696	5.36547	6.09817	68.5068	3.14651	1.93807	0.0526142	0.261627	0	0	0	0	0.534938	0	0.0158145	protein_coding	KNOWN	IL36B
10966	ENSG00000168955	63.7369	6.09432	68.3241	1.26559	4.8154	1.46905e-06	7.50043e-05	0.0190547	0.0305363	0.0114008	0.0228969	0.0402933	0.880334	3.43067	protein_coding	KNOWN	TM4SF20
20988	ENSG00000248359	5.33237	6.08859	68.0534	2.82485	2.15537	0.0311329	0.191374	0	0	0	0	1.87871	0	1.13014	lincRNA	NOVEL	CTC-537E7.2
8415	ENSG00000151834	5.32306	6.08612	67.9366	2.83102	2.1498	0.0315712	0.19268	0	0	0	0	0.0558703	0	0.0297308	protein_coding	KNOWN	GABRA2
21721	ENSG00000253405	5.32925	6.08537	67.9015	1.94249	3.13277	0.00173163	0.0255687	0	0	0	0	0.14284	0.0654424	0.542935	antisense	NOVEL	EVX1-AS
7067	ENSG00000139915	5.2516	6.07041	67.201	3.12727	1.94112	0.0522433	0.26055	0	0	0	0	0.00337615	0.119103	0	protein_coding	KNOWN	MDGA2
5087	ENSG00000125337	8.7328	6.05984	66.7103	1.79267	3.38035	0.000723944	0.0130894	0	0.00752491	0	0	0.417029	0.0159219	0.158513	protein_coding	KNOWN	KIF25
3128	ENSG00000107562	5.23101	6.05945	66.6923	2.2873	2.64917	0.00806908	0.0778749	0	0	0	0	0.00457005	0.0146564	0.145914	protein_coding	KNOWN	CXCL12
11068	ENSG00000169550	5.22198	6.05896	66.6695	2.24548	2.6983	0.00696956	0.0706823	0	0	0	0	0.256537	0.0331746	0.00880733	protein_coding	KNOWN	MUC15
17535	ENSG00000227471	22.5738	6.05751	66.6028	1.44031	4.2057	2.6027e-05	0.00088196	0.00789981	0	0.00945326	0.00949275	0.985599	0.254478	0.0355578	protein_coding	KNOWN	AKR1B15
15622	ENSG00000212993	229.339	6.05146	66.324	1.02537	5.90171	3.59761e-09	3.66361e-07	0.073508	0.0235603	0.0117284	0.0529983	0.445598	1.15488	6.44638	protein_coding	KNOWN	POU5F1B
12510	ENSG00000178882	101.197	6.04619	66.0821	1.05301	5.74184	9.36543e-09	8.64426e-07	0.0165565	0.0530657	0.0297183	0.019895	0.306343	0.849127	4.84395	protein_coding	KNOWN	FAM101A
18557	ENSG00000231929	5.13554	6.03821	65.7177	3.13393	1.92672	0.0540145	0.265817	0	0	0	0	0.0466759	1.6092	0	pseudogene	KNOWN	HMGB3P31
26229	ENSG00000283906	5.15735	6.03813	65.7139	1.91575	3.15184	0.00162245	0.0243357	0	0	0	0	1.13534	0.210064	1.76601	NA	NA	NA
18544	ENSG00000231881	35.3207	6.02628	65.1764	1.36307	4.4211	9.82015e-06	0.00038353	0.0326702	0.013089	0.0390946	0	3.47152	0.124628	0.533062	lincRNA	NOVEL	RP5-1120P11.3
7235	ENSG00000141316	5.10386	6.02581	65.1551	2.9655	2.03197	0.0421564	0.228732	0	0	0	0	0.699949	0	0.0961216	protein_coding	KNOWN	SPACA3
16904	ENSG00000224739	35.4579	6.02027	64.9057	1.50678	3.99546	6.457e-05	0.00185678	0	0.53284	0	0	1.87491	9.58317	16.7118	lincRNA	NOVEL	AC016735.1
20191	ENSG00000240347	5.08419	6.01988	64.8878	3.63844	1.65452	0.0980216	0.37183	0	0	0	0	0	0	3.37506	misc_RNA	KNOWN	RN7SL35P
19002	ENSG00000233854	5.06664	6.01567	64.699	3.63846	1.65336	0.0982585	0.372213	0	0	0	0	1.8911	0	0	antisense	NOVEL	POU6F2-AS2
20381	ENSG00000241832	5.0643	6.01301	64.5797	1.95354	3.07801	0.0020839	0.0294471	0	0	0	0	0.333556	0.0348827	0.138912	processed_transcript	KNOWN	CECR3
1679	ENSG00000089127	1982.65	6.01103	64.491	1.0221	5.88104	4.07689e-09	4.09457e-07	0.78052	0.659452	0.0571839	0.0574228	43.2161	13.8588	18.259	protein_coding	KNOWN	OAS1
13023	ENSG00000182747	50.095	6.00819	64.3642	1.54427	3.89063	9.99828e-05	0.00268993	0.0222695	0.0446104	0	0.01338	3.75554	0.0377563	0.200474	protein_coding	KNOWN	SLC35D3
15577	ENSG00000211979	5.04207	6.00623	64.2768	2.13626	2.81156	0.00493012	0.0551855	0	0	0	0	1.16575	0.0549797	1.1677	IG_V_gene	KNOWN	IGHV7-81
9628	ENSG00000162989	31.3041	5.99849	63.933	1.45174	4.13194	3.59711e-05	0.00115727	0.0103678	0.0124613	0	0	0.021924	0.347163	0.79333	protein_coding	KNOWN	KCNJ3
3986	ENSG00000115165	114.147	5.99828	63.9237	1.31696	4.55465	5.2472e-06	0.000223723	0.0306498	0.0613978	0	0.0368301	0.056711	4.12468	2.07798	protein_coding	KNOWN	CYTIP
7643	ENSG00000144290	21.1542	5.99718	63.8749	1.7363	3.454	0.000552347	0.010593	0.00695811	0	0.00416319	0	0.448769	0.0737311	0.00391489	protein_coding	KNOWN	SLC4A10
12850	ENSG00000181449	427.61	5.99429	63.7473	1.92073	3.12085	0.00180331	0.0262342	0.0627144	0.603023	0	0	29.7393	1.78099	0.45871	protein_coding	KNOWN	SOX2
6221	ENSG00000134757	8.31713	5.98825	63.481	1.7765	3.37082	0.000749454	0.0134422	0	0.00380944	0	0	0.185986	0.00806037	0.0909458	protein_coding	KNOWN	DSG3
3496	ENSG00000110934	50.1414	5.98701	63.4262	1.82874	3.27384	0.00106097	0.0173386	0.0262014	0	0.00783843	0.0157423	2.0985	0	0.250611	protein_coding	KNOWN	BIN2
22699	ENSG00000258897	4.93118	5.97635	62.9595	3.17213	1.88402	0.0595623	0.281185	0	0	0	0	2.97559	0	0.0959655	antisense	NOVEL	EGLN3-AS1
8810	ENSG00000156049	80.4218	5.97552	62.9234	0.654284	9.13292	6.66737e-20	3.28622e-17	0.0579203	0.0232053	0.0115517	0.0231999	1.89843	1.3748	2.28117	protein_coding	KNOWN	GNA14
21319	ENSG00000250266	26.611	5.9694	62.6569	1.7364	3.43781	0.000586447	0.0110916	0.224025	0	0	0	3.73059	6.74176	0.189066	lincRNA	NOVEL	RP11-789C1.1
7426	ENSG00000142973	12.7807	5.96028	62.262	1.50078	3.97147	7.14315e-05	0.00202806	0	0.0121449	0	0	0.432688	0.0835165	0.179084	protein_coding	KNOWN	CYP4B1
18219	ENSG00000230501	4.86086	5.95509	62.0384	2.8854	2.06387	0.0390297	0.2195	0	0	0	0	0.622927	0	0.248613	pseudogene	KNOWN	ANKRD30BP3
18230	ENSG00000230539	4.83217	5.94546	61.6259	2.18012	2.72713	0.00638876	0.0662646	0	0	0	0	1.11476	0.03886	0.464252	sense_intronic	NOVEL	AOAH-IT1
7776	ENSG00000145384	20.8027	5.93968	61.3794	1.3918	4.26763	1.97558e-05	0.00070153	0.0106	0	0.0126845	0.0127375	0.067245	0.314503	1.19279	protein_coding	KNOWN	FABP2
11548	ENSG00000172238	78.7239	5.93531	61.1938	1.79553	3.30561	0.000947697	0.0159203	0.0474989	0	0.0852588	0.0142692	0	5.18417	1.49658	protein_coding	KNOWN	ATOH1
9817	ENSG00000163737	4.77392	5.93511	61.1851	2.08919	2.84087	0.00449913	0.0514747	0	0	0	0	0.0919608	1.1797	0.24468	protein_coding	KNOWN	PF4
1696	ENSG00000089356	3419.13	5.93347	61.1155	1.36017	4.36229	1.28711e-05	0.000484267	3.15927	0.0757547	0.0282832	0.937246	114.604	65.3978	12.5446	protein_coding	KNOWN	FXYD3
15199	ENSG00000204528	4.77889	5.93205	61.0556	1.90395	3.11566	0.00183536	0.0266247	0	0	0	0	0.9835	0.413043	0.149531	sense_intronic	KNOWN	PSORS1C3
18966	ENSG00000233680	13.4053	5.92556	60.7816	1.41741	4.18056	2.90794e-05	0.000965812	0.0275046	0	0	0.0330507	1.48312	0.93264	0.216651	pseudogene	KNOWN	HNRNPA1P27
20594	ENSG00000243550	4.73884	5.91772	60.4519	2.99497	1.97588	0.0481679	0.247722	0	0	0	0	0.331608	0	2.38224	lincRNA	NOVEL	RP11-483E7.1
323	ENSG00000014257	397.401	5.91445	60.3153	1.091	5.42115	5.92174e-08	4.43572e-06	0.212992	0.12549	0	0.0526935	10.5512	2.60213	4.63839	protein_coding	KNOWN	ACPP
21341	ENSG00000250328	69.2832	5.89738	59.6056	1.69483	3.47962	0.000502129	0.00987587	0.127565	0	0	0	2.83239	0.36374	2.54468	antisense	NOVEL	CTC-210G5.1
20153	ENSG00000240045	4.64002	5.8917	59.3716	2.87587	2.04867	0.0404944	0.223484	0	0	0	0	0.254499	0.765182	0	lincRNA	NOVEL	RP11-451G4.2
16886	ENSG00000224652	4.63236	5.88634	59.1513	3.63919	1.61748	0.105774	0.38589	0	0	0	0	0.486165	0	0	lincRNA	NOVEL	LINC00885
8123	ENSG00000148584	138.417	5.8846	59.0802	1.1357	5.18148	2.20133e-07	1.38392e-05	0.0382939	0	0.00654631	0.0164341	0.595758	0.319985	1.78828	protein_coding	KNOWN	A1CF
7458	ENSG00000143196	4.60849	5.88422	59.0643	1.97485	2.97958	0.00288641	0.0373792	0	0	0	0	0.0466498	0.349087	0.0992969	protein_coding	KNOWN	DPT
88	ENSG00000005381	7.75588	5.87889	58.8469	2.23273	2.63305	0.00846224	0.0806069	0	0	0	0.00895162	0.267797	0.145246	0	protein_coding	KNOWN	MPO
21924	ENSG00000254399	4.5984	5.87824	58.8203	2.88215	2.03954	0.0413966	0.226254	0	0	0	0	0	0.712734	0.260992	pseudogene	KNOWN	GLYATL1P4
16853	ENSG00000224511	23.2646	5.87415	58.6538	1.22597	4.79143	1.65594e-06	8.21105e-05	0.00876147	0.0210612	0	0	0.51876	0.802139	0.138026	lincRNA	NOVEL	LINC00365
13807	ENSG00000187416	4.58427	5.87064	58.511	2.39106	2.45525	0.0140787	0.113905	0	0	0	0	0.423891	0.0234387	0.0155565	protein_coding	KNOWN	LHFPL3
7984	ENSG00000147168	284.751	5.8587	58.0287	2.2139	2.64633	0.00813709	0.0783628	0	0.442296	0	0	6.97323	0.10488	12.2727	protein_coding	KNOWN	IL2RG
21517	ENSG00000251249	4.52013	5.85222	57.7687	2.85202	2.05196	0.0401739	0.222548	0	0	0	0	0.185333	0.104016	0	processed_transcript	NOVEL	RP11-73G16.1
18962	ENSG00000233670	4.5072	5.8474	57.5762	1.67316	3.49483	0.000474371	0.00945061	0	0	0	0	0.0947607	0.0701316	0.0620627	protein_coding	KNOWN	PIRT
15087	ENSG00000204033	4.48241	5.8377	57.1904	2.88763	2.02163	0.043215	0.23147	0	0	0	0	0.131125	0	0.139553	protein_coding	KNOWN	LRIT2
15333	ENSG00000205293	24.8607	5.82819	56.8148	1.61813	3.60181	0.000316009	0.00684936	0.0124547	0.00997969	0.0149038	0.0149661	1.60655	0	0.60264	lincRNA	NOVEL	RP11-1112C15.1
24015	ENSG00000267194	90.2712	5.82776	56.7975	1.41427	4.12069	3.77742e-05	0.00120584	0.01049	0.142892	0	0	0.732014	3.10348	2.92741	lincRNA	NOVEL	RP1-193H18.2
6870	ENSG00000138449	622.146	5.82698	56.7671	1.90889	3.05255	0.00226902	0.031239	0.00606625	0.617319	0	0.00728947	7.81213	0.138846	18.9836	protein_coding	KNOWN	SLC40A1
4722	ENSG00000121797	82.4095	5.82577	56.7195	1.10921	5.25218	1.50307e-07	1.01051e-05	0.00858114	0.075635	0.0308057	0	0.4355	3.01158	1.60292	protein_coding	KNOWN	CCRL2
11884	ENSG00000174469	1780.2	5.81998	56.4921	1.38062	4.21549	2.4924e-05	0.000851911	0.416034	0.0429328	0.00188577	0.0113619	2.73923	9.79348	7.4851	protein_coding	KNOWN	CNTNAP2
24969	ENSG00000272789	4.3216	5.78491	55.1356	1.71486	3.37341	0.000742434	0.0133357	0	0	0	0	0.260772	0.261347	0.450993	antisense	NOVEL	RP11-286H15.1
13191	ENSG00000183715	4.29439	5.77986	54.9429	3.63985	1.58794	0.1123	0.398778	0	0	0	0	0	0.108647	0	protein_coding	KNOWN	OPCML
20055	ENSG00000239268	4.29439	5.77986	54.9429	3.63985	1.58794	0.1123	0.398778	0	0	0	0	0	1.48713	0	lincRNA	NOVEL	RP11-384F7.2
20536	ENSG00000243081	4.29396	5.77556	54.7794	2.0892	2.76448	0.00570136	0.0611686	0	0	0	0	0.408676	0.0427386	0.0756427	lincRNA	NOVEL	RP11-231E6.1
22401	ENSG00000257302	4.2598	5.7696	54.5536	1.88268	3.06456	0.00217989	0.030437	0	0	0	0	0.32534	0.450553	0.0944325	pseudogene	KNOWN	FAHD2P1
359	ENSG00000019169	4.26186	5.76866	54.5178	2.87642	2.0055	0.0449097	0.237145	0	0	0	0	0.146943	0.246338	0	protein_coding	KNOWN	MARCO
16087	ENSG00000214711	4.26605	5.76691	54.4518	2.33532	2.46943	0.0135329	0.110586	0	0	0	0	0.17989	0.0166418	0.00736357	protein_coding	KNOWN	CAPN14
20137	ENSG00000239893	4.23942	5.75696	54.0776	2.94983	1.95163	0.0509827	0.256831	0	0	0	0	0.165188	0	0.439515	pseudogene	KNOWN	ZNF736P9Y
9841	ENSG00000163817	1737.69	5.75598	54.0409	1.46341	3.93327	8.37994e-05	0.00233087	0.213263	0.911379	0.00472592	0.0759306	0.81425	40.4826	7.62155	protein_coding	KNOWN	SLC6A20
24027	ENSG00000267243	4.20702	5.75088	53.8502	3.19881	1.79782	0.0722062	0.314335	0	0	0	0	0.0218679	0.613652	0	lincRNA	NOVEL	AC005307.3
19704	ENSG00000236877	4.22208	5.7492	53.7877	1.91815	2.99726	0.00272418	0.0358242	0	0	0	0	0.525656	0.351211	1.67834	pseudogene	KNOWN	RP11-443K8.2
15878	ENSG00000213798	4.17832	5.7404	53.4603	3.6401	1.57699	0.114798	0.403005	0	0	0	0	0	1.00704	0	pseudogene	KNOWN	AC004129.9
23490	ENSG00000262294	6.98273	5.73408	53.2266	1.9424	2.95206	0.00315662	0.0400989	0	0.0281379	0	0	1.48514	0.238147	0.0395152	antisense	KNOWN	RP11-1260E13.2
2154	ENSG00000100565	4.15979	5.73008	53.0794	3.64017	1.57412	0.115459	0.403827	0	0	0	0	0	0	0.346225	protein_coding	KNOWN	C14orf166B
13644	ENSG00000186204	264.386	5.72031	52.7213	1.19477	4.78781	1.6861e-06	8.32709e-05	0.157081	0.0117999	0	0.0648846	5.47036	2.35526	1.41959	protein_coding	KNOWN	CYP4F12
1796	ENSG00000091972	42.3766	5.71656	52.5842	1.49035	3.83572	0.000125198	0.0032274	0	0.0633315	0	0	1.59706	0.632791	0.424931	protein_coding	KNOWN	CD200
12304	ENSG00000177398	4.09877	5.70762	52.2593	1.78585	3.19603	0.00139333	0.0216776	0	0	0	0	0.0267114	0.0244757	0.0568567	protein_coding	KNOWN	UMODL1
21025	ENSG00000248537	4.08123	5.70308	52.0951	3.07527	1.8545	0.0636678	0.292511	0	0	0	0	1.77571	0	0.226783	antisense	NOVEL	CTD-2201E9.4
10316	ENSG00000165899	6.79869	5.69497	51.8033	2.43682	2.33705	0.0194367	0.1418	0	0.0025116	0	0	0.142506	0.0106285	0	protein_coding	KNOWN	OTOGL
17441	ENSG00000227066	4.02461	5.68329	51.3854	3.23982	1.7542	0.0793968	0.330963	0	0	0	0	0.284141	0.00843758	0	lincRNA	NOVEL	RP3-340N1.2
24353	ENSG00000269667	4.01552	5.68238	51.3529	1.72199	3.2999	0.000967204	0.0161489	0	0	0	0	0.468729	0.657669	0.498859	lincRNA	NOVEL	RP11-542M13.2
14150	ENSG00000196091	6.79299	5.67992	51.2657	1.48885	3.81498	0.000136191	0.00344944	0	0	0	0.00427399	0.0940155	0.0301514	0.0480282	protein_coding	KNOWN	MYBPC1
12435	ENSG00000178248	10.1959	5.66943	50.8942	2.29309	2.47239	0.0134212	0.109981	0	0.0266758	0	0	0.281594	0.93131	0	lincRNA	NOVEL	AP000345.1
21004	ENSG00000248444	3.97489	5.66911	50.883	3.21914	1.76106	0.0782279	0.328461	0	0	0	0	0.0291113	0.770235	0	pseudogene	KNOWN	HNRNPA1P65
23294	ENSG00000261268	10.7294	5.66714	50.8135	2.0868	2.71571	0.00661348	0.0680796	0.0239225	0.0191686	0	0	1.66937	0.162235	0	lincRNA	NOVEL	RP11-308D13.3
13469	ENSG00000185275	3335.18	5.66049	50.5799	0.672778	8.41362	3.9756e-17	1.53085e-14	25.4021	17.5826	16.2981	8.313	1621.07	607.526	336.93	pseudogene	KNOWN	CD24P4
8413	ENSG00000151790	29.5554	5.66014	50.5675	1.85567	3.05018	0.00228704	0.0314344	0.00498991	0.0159933	0.00597114	0	0	0.994053	0.05615	protein_coding	KNOWN	TDO2
3528	ENSG00000111261	1310.77	5.64992	50.2106	1.21489	4.65055	3.31058e-06	0.000151085	0.0131007	0.63334	0.418049	0.0157423	11.5752	9.05849	20.0931	protein_coding	KNOWN	MANSC1
16115	ENSG00000214856	3.90855	5.64112	49.9052	3.64078	1.54943	0.121279	0.413103	0	0	0	0	0.315992	0	0	pseudogene	KNOWN	KRT16P1
18882	ENSG00000233355	3.91317	5.64036	49.8789	2.10863	2.67489	0.00747544	0.0741347	0	0	0	0	0.0142861	0.0343623	0.144442	processed_transcript	NOVEL	CHRM3-AS2
4975	ENSG00000124253	745.394	5.63842	49.812	0.617025	9.13807	6.35769e-20	3.23334e-17	0.11556	0.135808	0.124456	0.171264	12.9962	4.54544	2.88248	protein_coding	KNOWN	PCK1
18889	ENSG00000233376	6.53368	5.63487	49.6894	1.44976	3.88675	0.000101597	0.00272148	0	0.0522262	0	0	0.689136	0.828789	1.54021	antisense	NOVEL	RP5-881L22.6
6631	ENSG00000137078	6.55116	5.62717	49.4249	1.99985	2.8138	0.00489595	0.0549435	0	0	0.0236866	0	0.795285	0.0167798	0.111369	protein_coding	KNOWN	SIT1
17061	ENSG00000225391	6.45433	5.61982	49.1739	2.27771	2.46731	0.0136132	0.111124	0	0.0155101	0	0	0.634442	0.262541	0	lincRNA	NOVEL	RP11-55K22.5
4894	ENSG00000123561	3.85166	5.61892	49.1432	3.64093	1.54326	0.122767	0.415586	0	0	0	0	0	0	0.269291	protein_coding	KNOWN	SERPINA7
19533	ENSG00000236077	3.83013	5.61507	49.0122	3.64096	1.54219	0.123026	0.416041	0	0	0	0	0	0.76782	0	pseudogene	KNOWN	RP11-232D9.2
21158	ENSG00000249288	3.83013	5.61507	49.0122	3.64096	1.54219	0.123026	0.416041	0	0	0	0	0	2.90436	0	pseudogene	KNOWN	SLC25A15P5
10198	ENSG00000165269	45.051	5.61466	48.9983	1.0737	5.22927	1.70183e-07	1.1184e-05	0.0150011	0	0	0.0300432	0.798324	0.351826	0.450141	protein_coding	KNOWN	AQP7
2244	ENSG00000101076	3971.92	5.60783	48.767	1.42665	3.93076	8.46761e-05	0.00234731	0.150897	2.47004	0.00429929	0.146786	16.0077	35.0494	50.3983	protein_coding	KNOWN	HNF4A
13520	ENSG00000185565	113.285	5.59448	48.3176	2.12995	2.62658	0.00862479	0.0816376	0	0.046862	0	0.00916653	1.4034	0.644508	0	protein_coding	KNOWN	LSAMP
11379	ENSG00000171246	10.2446	5.58841	48.1148	1.84309	3.03209	0.00242864	0.0328673	0	0.00313996	0	0.00470885	0.261024	0.0199315	0.00440958	protein_coding	KNOWN	NPTX1
18719	ENSG00000232661	3.77153	5.58735	48.0796	2.08987	2.67354	0.00750553	0.0742413	0	0	0	0	2.13632	0.201509	0.936207	antisense	NOVEL	AC000111.3
20239	ENSG00000240692	3.76379	5.58664	48.056	3.64116	1.5343	0.124955	0.419252	0	0	0	0	2.38309	0	0	misc_RNA	KNOWN	RN7SL538P
25845	ENSG00000279429	3.74695	5.58208	47.9041	2.16385	2.5797	0.00988862	0.089528	0	0	0	0	0.610377	0.336449	0.0406008	NA	NA	NA
9484	ENSG00000162383	9.748	5.57958	47.8211	1.74629	3.19511	0.00139778	0.0217275	0	0.00778516	0	0	0.251681	0.0700084	0.0163995	protein_coding	KNOWN	SLC1A7
14177	ENSG00000196189	60.7408	5.57478	47.6623	1.32357	4.21192	2.53211e-05	0.000863087	0.0231019	0.00925557	0.00460746	0.00925342	1.53476	0.101183	0.0259959	protein_coding	KNOWN	SEMA4A
20067	ENSG00000239345	6.26099	5.57021	47.5115	1.63753	3.4016	0.000669928	0.0123207	0	0.019274	0	0	0.457783	0.0815633	0.541344	pseudogene	KNOWN	HNRNPA1P26
15450	ENSG00000206159	37.6075	5.56806	47.4408	1.87816	2.96463	0.00303043	0.0389578	0	0.0877372	0	0	2.2511	0.0309404	0.972012	pseudogene	KNOWN	GYG2P1
14217	ENSG00000196364	3.7157	5.56739	47.4188	2.41209	2.30812	0.0209924	0.14939	0	0	0	0	0.324903	0.0226519	0.0150343	lincRNA	NOVEL	PRSS29P
12397	ENSG00000178015	6.19842	5.55796	47.11	2.40007	2.31575	0.0205718	0.147276	0	0.0101923	0	0	0	0.0646977	0.500973	protein_coding	KNOWN	GPR150
17228	ENSG00000226122	3.69191	5.55524	47.0213	2.06983	2.68391	0.00727672	0.07272	0	0	0	0	0.140737	0.0250752	0.232997	antisense	NOVEL	AC018705.5
9234	ENSG00000160181	120.646	5.55478	47.0062	2.05297	2.70573	0.00681553	0.0696648	0	0.760741	0	0	3.54681	23.0448	0.53417	protein_coding	KNOWN	TFF2
24034	ENSG00000267259	24.3415	5.55179	46.909	1.36097	4.07931	4.51705e-05	0.00139497	0	0.0234552	0	0.0234498	1.34115	0.181972	0.164696	lincRNA	NOVEL	CTD-2008P7.9
18141	ENSG00000230107	10.4305	5.54931	46.8284	1.57841	3.51576	0.000438503	0.00890154	0.0459211	0	0.0549512	0	0.582633	2.60817	0.206695	lincRNA	NOVEL	CTA-126B4.7
18435	ENSG00000231412	9.53321	5.54533	46.6992	1.73582	3.19465	0.00140001	0.0217275	0	0.139848	0	0	4.70558	0.73976	0.490986	lincRNA	NOVEL	CTC-490G23.2
20888	ENSG00000247011	9.63166	5.54454	46.6739	1.48801	3.72614	0.000194437	0.00458975	0	0.0204938	0	0	0.500278	0.249336	0.129511	lincRNA	NOVEL	RP11-700H6.1
6832	ENSG00000138207	13.0104	5.53865	46.4836	1.88273	2.94181	0.00326297	0.0410478	0	0.0435759	0	0	1.09249	0.015367	0.571157	protein_coding	KNOWN	RBP4
8275	ENSG00000150471	3.63089	5.53646	46.4131	2.17775	2.54229	0.0110129	0.0961053	0	0	0	0	0.03176	0.0159151	0.0021126	protein_coding	KNOWN	LPHN3
17903	ENSG00000229005	13.8742	5.53633	46.4089	1.2519	4.42234	9.76365e-06	0.000381929	0	0.0692341	0	0	0.730847	0.854537	1.26397	antisense	NOVEL	RP5-881L22.4
4200	ENSG00000116701	252.73	5.53519	46.3724	1.1519	4.80528	1.54537e-06	7.82015e-05	0.0538256	0.265965	0.075145	0.0646791	11.7709	4.137	0.1918	protein_coding	KNOWN	NCF2
19835	ENSG00000237520	3.6353	5.53328	46.311	1.96921	2.8099	0.00495569	0.0553798	0	0	0	0	0.722208	0.15792	0.768632	lincRNA	NOVEL	RP11-443B7.2
18729	ENSG00000232698	6.10131	5.52863	46.1619	1.8321	3.01765	0.00254745	0.0340083	0.0567319	0	0	0	2.03943	0.240462	0.191517	lincRNA	NOVEL	AP001058.3
14176	ENSG00000196188	233.025	5.52784	46.1366	1.15884	4.77017	1.84072e-06	8.94726e-05	0.0295023	0.0551592	0.353037	0.0354512	4.59577	11.0709	0.597566	protein_coding	KNOWN	CTSE
15305	ENSG00000205076	6.06352	5.52658	46.0962	2.53428	2.18073	0.0292032	0.184345	0	0.0264744	0	0	1.36241	0	0.0743582	protein_coding	KNOWN	LGALS7
22930	ENSG00000259786	3.59672	5.52499	46.0455	3.05158	1.81053	0.0702132	0.308969	0	0	0	0	0.0394491	0.205588	0	lincRNA	NOVEL	CTD-2118P12.1
3704	ENSG00000112499	3.60582	5.52159	45.9373	1.92326	2.87095	0.0040924	0.0482785	0	0	0	0	0.0270026	0.0180415	0.0670561	protein_coding	KNOWN	SLC22A2
26211	ENSG00000283579	3.59779	5.52114	45.9227	1.94604	2.83711	0.00455243	0.051988	0	0	0	0	0.144647	0.386576	0.667094	NA	NA	NA
16644	ENSG00000223552	6.0094	5.51736	45.8027	1.85217	2.97886	0.00289321	0.0374476	0	0.0320841	0	0	0.0423356	1.05224	0.630798	antisense	NOVEL	RP11-24F11.2
23386	ENSG00000261617	6.03589	5.5143	45.7056	1.76989	3.11562	0.00183556	0.0266247	0.00495788	0	0	0	0.152018	0.0504344	0.0111579	lincRNA	NOVEL	RP11-243A14.1
13074	ENSG00000183023	13.5234	5.51206	45.6346	1.30753	4.21561	2.49105e-05	0.000851911	0	0.00288028	0	0	0.0215367	0.0507864	0.0431455	protein_coding	KNOWN	SLC8A1
20623	ENSG00000243766	350.659	5.51182	45.627	0.777452	7.08959	1.34509e-12	2.67327e-10	0.0209465	0.218192	0.0877291	0.0503404	3.22237	3.8665	5.94565	antisense	KNOWN	HOTTIP
7880	ENSG00000146215	3.57506	5.5086	45.5254	2.15166	2.56017	0.0104622	0.0931135	0	0	0	0	0.0566086	0.0181547	0.204841	protein_coding	KNOWN	CRIP3
17208	ENSG00000226041	3.56163	5.50701	45.4753	3.17925	1.73217	0.083243	0.339249	0	0	0	0	1.00276	0.0699114	0	lincRNA	NOVEL	AC010745.1
2618	ENSG00000103888	15600.8	5.50085	45.2813	1.29137	4.25971	2.04694e-05	0.000723401	7.17936	1.74265	0.0288708	2.28204	228.737	131.284	21.4748	protein_coding	KNOWN	KIAA1199
13633	ENSG00000186160	5.95414	5.50063	45.2747	1.68112	3.272	0.00106788	0.0174169	0.0131598	0	0	0	0.0834835	0.401605	0.0740415	protein_coding	KNOWN	CYP4Z1
18437	ENSG00000231422	10.123	5.5001	45.258	1.66836	3.29672	0.000978211	0.0162666	0.00877904	0	0	0.0105493	0.111386	0.498621	0.0197576	lincRNA	NOVEL	RP11-80K21.3
10516	ENSG00000166840	14.4484	5.49613	45.1335	2.38105	2.30827	0.0209839	0.149373	0.0144854	0	0	0	0	0.446154	0.0489001	protein_coding	KNOWN	GLYATL1
2430	ENSG00000102290	3.51063	5.49019	44.9481	3.2667	1.68065	0.0928301	0.360042	0	0	0	0	0.00238798	0.0555234	0	protein_coding	KNOWN	PCDH11X
12616	ENSG00000179603	162.045	5.48973	44.9338	1.19132	4.60812	4.06334e-06	0.000180427	0.0569516	0.0749706	0	0.00488825	1.11828	0.620725	2.9388	protein_coding	KNOWN	GRM8
2857	ENSG00000105523	327.35	5.48939	44.9231	0.525125	10.4535	1.4123e-25	1.39219e-22	0.197339	0.158124	0.174001	0.187209	7.52232	4.0413	12.5522	protein_coding	KNOWN	FAM83E
6914	ENSG00000138755	3.49927	5.48826	44.888	2.26469	2.4234	0.0153758	0.121411	0	0	0	0	0.0202717	0.203164	0.0215747	protein_coding	KNOWN	CXCL9
23600	ENSG00000263508	3.51923	5.48638	44.8296	2.06617	2.65533	0.007923	0.0768718	0	0	0	0	0.394695	0.0575369	0.420066	lincRNA	NOVEL	RP11-963H4.3
23920	ENSG00000266711	3.51149	5.48589	44.8144	3.0941	1.77302	0.0762259	0.323491	0	0	0	0	1.01544	0	0.216142	antisense	NOVEL	RP11-398J5.1
15158	ENSG00000204361	14.3226	5.47298	44.4152	1.46822	3.72763	0.000193288	0.00456702	0.0420719	0	0	0	0.355863	0.879734	0.189369	protein_coding	KNOWN	NXPE2
12425	ENSG00000178199	85.6996	5.47249	44.4	0.762818	7.17404	7.28152e-13	1.53604e-10	0.0234073	0.0312597	0	0.0140636	1.03532	0.499374	0.838476	protein_coding	KNOWN	ZC3H12D
20125	ENSG00000239783	3.47427	5.47111	44.3576	3.64204	1.50221	0.133043	0.432048	0	0	0	0	1.79175	0	0	pseudogene	KNOWN	RP5-1050K3.3
20748	ENSG00000244564	3.47427	5.47111	44.3576	3.64204	1.50221	0.133043	0.432048	0	0	0	0	1.1797	0	0	lincRNA	NOVEL	RP11-14D22.1
23173	ENSG00000260765	3.47427	5.47111	44.3576	3.64204	1.50221	0.133043	0.432048	0	0	0	0	0.53666	0	0	pseudogene	KNOWN	CES1P2
14663	ENSG00000198216	189.251	5.46277	44.1019	1.46885	3.71908	0.000199951	0.00468402	0.0103471	0.0402703	0.00353766	0.00532866	0.554818	1.42723	0.00166333	protein_coding	KNOWN	CACNA1E
17565	ENSG00000227597	16.8303	5.45991	44.0145	1.39691	3.90855	9.28533e-05	0.00253689	0	0.0744374	0	0	0.491108	0.590631	1.6987	pseudogene	KNOWN	AC019100.7
21745	ENSG00000253507	3.44557	5.45911	43.9901	3.29962	1.65446	0.0980334	0.37183	0	0	0	0	0.649146	0.0226288	0	lincRNA	NOVEL	CTD-2501M5.1
14899	ENSG00000199370	3.42199	5.45287	43.8003	3.02175	1.80454	0.071147	0.311339	0	0	0	0	0.793491	2.33271	0	snoRNA	NOVEL	U3
4269	ENSG00000117228	27.1232	5.44711	43.6259	0.97678	5.5766	2.45263e-08	2.0489e-06	0	0.0168647	0.00629649	0.0063228	0.1669	0.508496	0.337494	protein_coding	KNOWN	GBP1
18117	ENSG00000230023	5.72442	5.43415	43.2356	1.90335	2.85504	0.00430319	0.0501171	0.014206	0	0	0	0.495663	0.0361278	0.0479568	lincRNA	NOVEL	RP11-10N16.2
22939	ENSG00000259823	5.69303	5.43365	43.2207	1.86749	2.9096	0.00361893	0.0442015	0	0.0137563	0	0	0.0181517	0.218302	0.463645	NA	NA	NA
22809	ENSG00000259354	31.1147	5.43192	43.169	1.69573	3.20329	0.00135867	0.0212052	0.00675936	0	0.0404427	0	1.24353	0.01719	0.228184	antisense	NOVEL	RP11-519G16.3
17071	ENSG00000225437	42.5394	5.42553	42.9782	1.57443	3.44604	0.000568865	0.0108591	0	0	0	0.163753	1.18869	1.31406	2.62605	antisense	NOVEL	RP1-257A15.1
4786	ENSG00000122548	12.0279	5.42484	42.9576	1.87552	2.89244	0.00382261	0.0459534	0	0.0147424	0	0	0.00648428	0.379518	0.138022	protein_coding	KNOWN	KIAA0087
17129	ENSG00000225680	49.2721	5.42366	42.9225	1.0506	5.16244	2.43751e-07	1.5131e-05	0.108541	0.260915	0	0	3.74886	6.01142	2.8906	lincRNA	NOVEL	AL163953.2
17122	ENSG00000225664	5.67407	5.41492	42.6631	2.6297	2.05914	0.0394808	0.220649	0	0	0.0429988	0	1.40571	0	0.0404342	pseudogene	KNOWN	YWHAZP8
6736	ENSG00000137757	5.64217	5.41407	42.6379	1.67254	3.23703	0.00120782	0.0192035	0	0	0.0197438	0	0.0872242	0.46156	0.111397	protein_coding	KNOWN	CASP5
12547	ENSG00000179088	5.62172	5.41135	42.5577	1.76878	3.05937	0.00221805	0.0307779	0	0.00429709	0	0	0.0453608	0.0136383	0.156899	protein_coding	KNOWN	C12orf42
13861	ENSG00000187773	5.59949	5.40666	42.4197	2.11753	2.55329	0.010671	0.0942933	0	0.00547675	0	0	0.0144534	0.00579412	0.25381	protein_coding	KNOWN	FAM69C
24371	ENSG00000269834	5.59664	5.40504	42.3719	1.56127	3.46196	0.000536265	0.0103704	0	0.00505942	0	0	0.10014	0.0321156	0.120787	processed_transcript	NOVEL	CTD-3018O17.3
22174	ENSG00000255690	30.0035	5.40449	42.3558	1.91084	2.82833	0.00467919	0.0531646	0	0.0341259	0	0	0.0168862	0.983818	0.131792	pseudogene	KNOWN	AC005013.1
10548	ENSG00000166959	5.58165	5.40016	42.229	2.28691	2.36134	0.0182091	0.136189	0.0101691	0	0	0	0	0.232754	0.171646	protein_coding	KNOWN	MS4A8
2243	ENSG00000101074	5.57285	5.40009	42.2269	1.97522	2.73392	0.00625853	0.0652434	0	0.0152848	0	0	0.0201686	0.097023	0.643952	protein_coding	KNOWN	R3HDML
18600	ENSG00000232124	9.49789	5.39734	42.1465	1.70491	3.16575	0.00154681	0.0234727	0.0328747	0	0	0.0395036	1.91173	0.111473	0.184965	antisense	NOVEL	AP001057.1
25710	ENSG00000278972	3.28525	5.39555	42.0941	2.19544	2.45761	0.0139864	0.113345	0	0	0	0	0.0906846	0.154504	0.0120642	NA	NA	NA
10796	ENSG00000168065	17.9759	5.39455	42.065	1.33683	4.03533	5.45267e-05	0.00162879	0	0.00806096	0.00601917	0.00604431	0.521194	0.0511684	0.067922	protein_coding	KNOWN	SLC22A11
21871	ENSG00000254111	3.29563	5.39124	41.9686	2.2768	2.36791	0.0178891	0.134572	0	0	0	0	0.196733	0.026289	0.523448	lincRNA	NOVEL	RP11-150O12.5
24463	ENSG00000270168	112.021	5.38713	41.8492	1.46591	3.67495	0.000237897	0.00540843	0	0.285801	0.030487	0	1.64316	5.32373	3.13922	lincRNA	NOVEL	LA16c-380H5.4
16175	ENSG00000215146	3.27339	5.38614	41.8204	3.04619	1.76816	0.077035	0.325467	0	0	0	0	0.0672163	0.0221907	0	pseudogene	KNOWN	RP11-313J2.1
18318	ENSG00000230880	5.55928	5.38429	41.7669	2.01753	2.66876	0.00761326	0.0749885	0	0	0.0135659	0	0.395547	0.0384407	0.0127567	lincRNA	NOVEL	RP11-417J8.3
21835	ENSG00000253929	17.9911	5.38261	41.7183	1.00495	5.35608	8.50446e-08	6.11032e-06	0.181151	0.0725764	0	0.108839	2.29839	3.8391	5.40187	lincRNA	NOVEL	RP11-382A18.2
1349	ENSG00000079385	1315.25	5.36777	41.2914	1.14297	4.69633	2.6488e-06	0.000124337	0.275793	0.922052	0.0113802	0.217127	27.9381	4.15184	12.1622	protein_coding	KNOWN	CEACAM1
15026	ENSG00000203645	9.57849	5.36149	41.1122	1.9445	2.75726	0.0058288	0.0620699	0	0	0	0.0308538	0.610825	0.0108831	0.245589	lincRNA	NOVEL	LINC00501
2583	ENSG00000103485	1989.49	5.35764	41.0025	1.76516	3.03522	0.00240362	0.0326903	0.0360611	3.18424	0.077674	0	30.3801	7.27553	63.8462	protein_coding	KNOWN	QPRT
12983	ENSG00000182489	343.069	5.3567	40.9758	0.554475	9.66085	4.42178e-22	2.4766e-19	0.186953	0.112351	0.111858	0.20593	7.93961	8.0694	2.89263	protein_coding	KNOWN	XKRX
833	ENSG00000064787	65.6034	5.35339	40.8818	1.0441	5.12729	2.93936e-07	1.79301e-05	0.0352963	0.00514224	0	0.00771156	0.206951	0.538581	0.743809	protein_coding	KNOWN	BCAS1
7656	ENSG00000144406	5.33041	5.337	40.42	2.63918	2.02222	0.0431541	0.231344	0	0.00109291	0	0	0.0504739	0	0.00153481	protein_coding	KNOWN	UNC80
19252	ENSG00000234928	28.6054	5.33654	40.4072	1.22151	4.36879	1.24937e-05	0.000473683	0.0485076	0.0777365	0	0.0291444	2.89774	1.85043	0.163753	lincRNA	NOVEL	AP000344.3
15024	ENSG00000203635	32.8636	5.33527	40.3717	1.11836	4.77062	1.83658e-06	8.94478e-05	0.0160066	0.0641291	0.0383085	0	2.06472	1.42475	0.234154	lincRNA	NOVEL	AC144450.2
17834	ENSG00000228695	3.15733	5.3339	40.3333	3.07956	1.73203	0.0832673	0.339292	0	0	0	0	0.147771	0.0418156	0	pseudogene	KNOWN	CES1P1
22615	ENSG00000258548	3.15605	5.33244	40.2926	3.33644	1.59824	0.109989	0.394551	0	0	0	0	0.15961	0.00609381	0	lincRNA	NOVEL	LINC00645
15226	ENSG00000204614	9.29534	5.33218	40.2853	1.74527	3.05522	0.00224893	0.0310605	0	0	0.0251759	0	0.378155	0.0267522	0.284092	protein_coding	KNOWN	TRIM40
12462	ENSG00000178462	158.072	5.33082	40.2472	1.53098	3.48195	0.000497771	0.00982199	0.423659	0.0117059	0.0349634	0.0702189	1.01945	15.2078	0.0986342	protein_coding	KNOWN	TUBAL3
23970	ENSG00000267013	3.13843	5.32875	40.1897	1.90895	2.79146	0.00524709	0.0575731	0	0	0	0	0.0613266	0.0913149	0.0372964	lincRNA	NOVEL	CTD-2171N6.1
26189	ENSG00000283283	8.60989	5.32862	40.1859	1.60498	3.32006	0.000899978	0.0153516	0.0117894	0.00944666	0	0	0.0997206	0.0499703	0.570452	NA	NA	NA
11738	ENSG00000173406	3.14284	5.32426	40.0647	2.12594	2.50443	0.012265	0.103336	0	0	0	0	0.00735882	0.0177001	0.0548229	protein_coding	KNOWN	DAB1
23280	ENSG00000261209	5.2564	5.3217	39.9937	1.67471	3.17768	0.00148459	0.0227527	0	0.071589	0	0	0.28339	1.96917	1.10589	pseudogene	KNOWN	RP11-443K8.1
23093	ENSG00000260426	5.24524	5.31815	39.8954	2.61648	2.03256	0.0420974	0.228664	0	0.0113096	0	0	0.0149233	0.514493	0	sense_overlapping	NOVEL	RP5-912I13.1
24359	ENSG00000269729	5.24269	5.31714	39.8675	2.33228	2.27981	0.0226191	0.156877	0	0.0247905	0	0	0.294405	0.865493	0	lincRNA	NOVEL	AC006262.4
16018	ENSG00000214290	72.5534	5.31709	39.8661	1.31131	4.05479	5.01802e-05	0.00152672	0	0.153331	0.0610628	0	0.89022	1.53564	4.11995	protein_coding	KNOWN	COLCA2
11463	ENSG00000171759	242.543	5.30801	39.616	1.41996	3.73814	0.000185389	0.00443121	0.0951329	0.0353917	0	0.0653233	2.5685	3.22006	0.0344091	protein_coding	KNOWN	PAH
16910	ENSG00000224769	51.198	5.30612	39.5641	1.28711	4.12251	3.74761e-05	0.00119943	0.0625402	0	0	0.131514	1.33902	0.68921	3.6243	pseudogene	KNOWN	AC069213.1
21777	ENSG00000253659	5.2076	5.30367	39.4969	2.35592	2.25121	0.0243721	0.16469	0	0.0332499	0	0	1.22847	0.316589	0	lincRNA	NOVEL	RP11-1114I9.1
22443	ENSG00000257588	56.3112	5.29996	39.3954	1.03208	5.13521	2.81832e-07	1.72773e-05	0.033376	0.160461	0	0.020053	1.14688	3.32446	2.17831	antisense	NOVEL	RP11-469H8.6
11988	ENSG00000175164	412.362	5.29664	39.305	0.651571	8.12903	4.3273e-16	1.42189e-13	0.0372228	0.0762218	0.11878	0.178914	5.64976	2.05804	4.3375	processed_transcript	KNOWN	ABO
24139	ENSG00000267709	3.06684	5.2903	39.1326	2.08699	2.5349	0.011248	0.0972272	0	0	0	0	0.0467545	0.149945	0.298559	antisense	NOVEL	AC024592.9
6945	ENSG00000138964	36.0258	5.28592	39.0139	1.07537	4.91546	8.8575e-07	4.83955e-05	0.00606906	0.0121576	0.00363125	0.00364642	0.182881	0.043731	0.546347	protein_coding	KNOWN	PARVG
16698	ENSG00000223829	3.04637	5.28587	39.0125	3.32617	1.58918	0.112021	0.398679	0	0	0	0	0.0180691	0.362179	0	processed_transcript	NOVEL	AC004870.4
1857	ENSG00000095110	35.8464	5.2817	38.9001	1.56761	3.36927	0.000753665	0.0134687	0.0243381	0	0.029124	0	0.135097	1.35654	0.0479272	protein_coding	KNOWN	NXPE1
25894	ENSG00000279655	3.04254	5.28143	38.8928	3.04843	1.73251	0.083183	0.339117	0	0	0	0	0.559749	0.345221	0	NA	NA	NA
177	ENSG00000007908	3.04411	5.27856	38.8154	3.16189	1.66943	0.0950318	0.365069	0	0	0	0	0.0242287	0	0.103145	protein_coding	KNOWN	SELE
23734	ENSG00000264990	3.03998	5.27835	38.8099	3.64367	1.44864	0.147439	0.454619	0	0	0	0	0.358021	0	0	lincRNA	NOVEL	RP11-215E13.2
22251	ENSG00000256232	3.0392	5.27642	38.7578	2.37733	2.21947	0.0264545	0.174103	0	0	0	0	0.543925	0.025653	0.102157	lincRNA	NOVEL	RP11-771K4.1
16153	ENSG00000215037	3.01768	5.27178	38.6334	3.64373	1.44681	0.14795	0.455572	0	0	0	0	0	1.20361	0	pseudogene	KNOWN	VENTXP2
20234	ENSG00000240666	3.01384	5.26802	38.533	3.04798	1.72836	0.0839229	0.340668	0	0	0	0	0.402495	0.295815	0	antisense	NOVEL	MME-AS1
17231	ENSG00000226132	23.985	5.2654	38.463	0.863905	6.09488	1.09516e-09	1.25531e-07	0.0385145	0.123444	0	0.0462807	1.95464	2.67724	1.90693	pseudogene	KNOWN	RPS3AP46
15053	ENSG00000203785	3.01129	5.26468	38.4439	3.3568	1.56836	0.116796	0.40611	0	0	0	0	0.756735	0.0303362	0	protein_coding	KNOWN	SPRR2E
26165	ENSG00000283000	3.01129	5.26468	38.4439	3.3568	1.56836	0.116796	0.40611	0	0	0	0	0.478418	0.019179	0	NA	NA	NA
22742	ENSG00000259087	5.0681	5.25462	38.1768	2.64393	1.98743	0.046875	0.243198	0.0493738	0	0	0	1.72271	0	0.055559	lincRNA	NOVEL	RP11-356O9.2
13476	ENSG00000185306	23.878	5.2538	38.1551	1.71356	3.06603	0.00216925	0.0303227	0.014317	0.00764795	0	0.00573463	0.671094	0.133504	0	protein_coding	KNOWN	C12orf56
23506	ENSG00000262558	5.07809	5.25082	38.0764	1.57574	3.33228	0.000861364	0.0148519	0	0	0	0.0345711	0.577953	0.292663	0.16187	antisense	KNOWN	RP11-1260E13.3
15073	ENSG00000203876	49.7834	5.24634	37.9582	1.0947	4.79251	1.64707e-06	8.20009e-05	0.00583255	0.0186941	0	0.010513	0.632097	0.0618041	0.331442	protein_coding	PUTATIVE	RP11-451M19.3
21729	ENSG00000253428	2.96966	5.24341	37.8811	3.10276	1.68992	0.0910441	0.356198	0	0	0	0	0.649641	0	0.460934	lincRNA	NOVEL	CTB-43E15.2
12736	ENSG00000180543	2.92726	5.22245	37.3348	3.64418	1.43309	0.151831	0.461372	0	0	0	0	0	0	0.125048	protein_coding	KNOWN	TSPYL5
20567	ENSG00000243349	2.92314	5.2212	37.3026	3.20995	1.62657	0.103829	0.382625	0	0	0	0	0.129812	0	0.0243806	processed_transcript	NOVEL	RP11-445N18.7
7462	ENSG00000143217	767.166	5.2203	37.2793	1.07659	4.84894	1.24124e-06	6.48072e-05	0.885063	0.294492	0.0718037	0.198285	32.5463	5.83692	2.19444	protein_coding	KNOWN	PVRL4
19870	ENSG00000237713	2.90161	5.21532	37.1507	3.64425	1.43111	0.152399	0.462308	0	0	0	0	0	0.661128	0	lincRNA	NOVEL	AC006000.5
16739	ENSG00000224034	4.91787	5.21221	37.0707	2.31042	2.25596	0.024073	0.163267	0.0379579	0	0	0	0.842797	0.482662	0	lincRNA	NOVEL	RP11-445P17.8
15115	ENSG00000204179	2.89522	5.20792	36.9607	3.64432	1.42905	0.152989	0.462836	0	0	0	0	0.123268	0	0	protein_coding	KNOWN	PTPN20A
17604	ENSG00000227777	2.89522	5.20792	36.9607	3.64432	1.42905	0.152989	0.462836	0	0	0	0	0.898776	0	0	pseudogene	KNOWN	RP4-738P11.3
9599	ENSG00000162882	63.7009	5.19774	36.7007	1.40118	3.70954	0.000207633	0.00482272	0.0192714	0.100372	0.023061	0.0115787	4.05478	0.0571781	0.216855	protein_coding	KNOWN	HAAO
4410	ENSG00000118729	2.86653	5.19358	36.5952	3.37922	1.53692	0.124314	0.418224	0	0	0	0	0.190564	0.00804145	0	protein_coding	KNOWN	CASQ2
5094	ENSG00000125363	2.84088	5.18774	36.4474	2.21396	2.3432	0.0191192	0.140194	0	0	0	0	0.0665202	0.480003	0.106194	protein_coding	KNOWN	AMELX
25187	ENSG00000273933	2.85644	5.18731	36.4365	2.32197	2.23401	0.0254822	0.169725	0	0	0	0	0.525864	0.0527024	0.0699583	NA	NA	NA
24529	ENSG00000270562	8.11819	5.18656	36.4176	1.32194	3.92345	8.72917e-05	0.00240336	0.0106473	0	0	0.0127942	0.112575	0.243698	0.251603	lincRNA	NOVEL	RP11-154H23.3
13502	ENSG00000185477	1234.58	5.18251	36.3154	2.05887	2.51717	0.0118302	0.100741	0.321318	0	0	0.23042	0.129683	12.9383	1.95753	protein_coding	KNOWN	GPRIN3
24312	ENSG00000269259	2.82227	5.17818	36.2065	2.30793	2.24364	0.0248553	0.166903	0	0	0	0	0.10201	0.368046	0.0271418	protein_coding	KNOWN	HUG1
20044	ENSG00000239112	2.83421	5.17584	36.1479	3.12534	1.65609	0.0977035	0.371174	0	0	0	0	3.96745	0	3.80023	snoRNA	KNOWN	SNORD123
21540	ENSG00000251370	7.45357	5.17367	36.0935	1.65279	3.13027	0.00174648	0.0257264	0	0.0250711	0	0	0.496227	0.0663097	0.264062	lincRNA	NOVEL	CTD-2201E9.1
3752	ENSG00000112902	1959.11	5.16907	35.9787	3.39531	1.52242	0.127905	0.423587	0	1.11004	0	0	20.6208	1.22222	8.11686	protein_coding	KNOWN	SEMA5A
11025	ENSG00000169248	11.3607	5.1657	35.8948	1.25127	4.12837	3.65347e-05	0.00117082	0.0275334	0.011031	0	0	0.160112	0.571841	0.371791	protein_coding	KNOWN	CXCL11
18400	ENSG00000231252	11.1229	5.16355	35.8413	1.83252	2.81773	0.00483643	0.054479	0.0122599	0.00491182	0	0	0.00648125	0.0259822	0.448362	lincRNA	NOVEL	RP11-436K8.1
21903	ENSG00000254290	270.213	5.16221	35.8079	1.69121	3.05238	0.00227036	0.0312399	0	0.698918	0	0.0796051	5.80192	2.04042	13.1697	lincRNA	NOVEL	RP11-150O12.3
19946	ENSG00000237988	2.79699	5.15722	35.6844	3.1704	1.62668	0.103805	0.382616	0	0	0	0	0.410138	0	0.155893	pseudogene	KNOWN	OR2I1P
21274	ENSG00000250001	2.79699	5.15722	35.6844	3.1704	1.62668	0.103805	0.382616	0	0	0	0	0.716041	0	0.272167	sense_intronic	NOVEL	CTD-2201E9.2
22634	ENSG00000258604	2.79699	5.15722	35.6844	3.1704	1.62668	0.103805	0.382616	0	0	0	0	0.655667	0	0.249219	lincRNA	NOVEL	AL161668.5
8747	ENSG00000155307	2.78555	5.15656	35.668	3.64481	1.41477	0.157137	0.468143	0	0	0	0	0	0.168635	0	protein_coding	KNOWN	SAMSN1
23147	ENSG00000260658	2.78555	5.15656	35.668	3.64481	1.41477	0.157137	0.468143	0	0	0	0	0	0.657322	0	lincRNA	NOVEL	RP11-368L12.1
18974	ENSG00000233718	4.71386	5.15555	35.6431	1.75483	2.93792	0.00330424	0.0413866	0	0.027334	0	0	0.829558	0.202425	0.115159	antisense	KNOWN	MYCNOS
21022	ENSG00000248528	8.12365	5.15545	35.6407	1.99199	2.58809	0.00965102	0.0880888	0.0371526	0	0	0.0446441	1.49271	0.629895	0	lincRNA	NOVEL	CTC-458G6.2
24154	ENSG00000267793	2.78768	5.15254	35.5689	3.1964	1.61199	0.106965	0.388367	0	0	0	0	0.730847	0	0.20742	pseudogene	KNOWN	RP11-576C2.1
12623	ENSG00000179674	109.737	5.15041	35.5162	1.30183	3.95628	7.61253e-05	0.00214404	0.121794	0.0325304	0	0.439058	12.1691	1.49707	2.01008	protein_coding	KNOWN	ARL14
23714	ENSG00000264755	2.7869	5.14996	35.5053	2.28659	2.25224	0.0243069	0.164295	0	0	0	0	4.84911	0.353441	3.28415	miRNA	KNOWN	MIR3131
26101	ENSG00000280997	7.86129	5.14823	35.4626	1.39918	3.67947	0.000233721	0.00533811	0.029985	0	0	0	0.221924	0.355862	0.25306	NA	NA	NA
2708	ENSG00000104755	2.7732	5.14432	35.3667	3.64493	1.41136	0.158138	0.469662	0	0	0	0	0	0	0.183144	protein_coding	KNOWN	ADAM2
1590	ENSG00000087128	2.76104	5.14004	35.2618	2.30731	2.22772	0.0258994	0.171485	0	0	0	0	0.181857	0.0520739	0.0138248	protein_coding	KNOWN	TMPRSS11E
12754	ENSG00000180712	11.1549	5.13854	35.2252	1.23922	4.14658	3.37476e-05	0.00110156	0	0.0178896	0	0.0134141	0.271466	0.141947	0.464778	lincRNA	NOVEL	RP11-290F5.2
2426	ENSG00000102243	4.69739	5.13804	35.213	1.77512	2.89447	0.00379798	0.0457829	0.0170453	0	0	0	0.270333	0.0288991	0.268529	protein_coding	KNOWN	VGLL1
26227	ENSG00000283877	4.65157	5.1325	35.078	1.78115	2.88157	0.00395704	0.0472239	0	0.072327	0	0	1.62243	0.153036	1.21886	NA	NA	NA
8387	ENSG00000151632	86.4382	5.13191	35.0638	1.49239	3.43872	0.000584463	0.0110711	0.0162618	0.0618939	0	0.0146557	1.70648	0.758194	0.00914948	protein_coding	KNOWN	AKR1C2
15078	ENSG00000203907	4.65143	5.11908	34.7532	3.35682	1.52498	0.127265	0.422513	0	0	0.0214261	0	0.586869	0	0	protein_coding	KNOWN	OOEP
22023	ENSG00000254872	50.8166	5.11593	34.6775	0.875624	5.84261	5.13885e-09	4.96635e-07	0.0305163	0.0122261	0.0182585	0.0458371	0.508175	1.83024	0.386315	lincRNA	NOVEL	RP13-870H17.3
16042	ENSG00000214381	2.71658	5.11205	34.5843	2.46649	2.0726	0.0382098	0.216327	0	0	0	0	0.0220414	0.00883603	0.175937	lincRNA	KNOWN	LINC00488
3449	ENSG00000110448	46.1379	5.10602	34.4402	1.36601	3.7379	0.000185563	0.00443121	0.0570842	0.00653436	0	0.039197	0.120711	2.29512	0.229412	protein_coding	KNOWN	CD5
22071	ENSG00000255130	2.68426	5.10113	34.3236	2.0998	2.42934	0.0151264	0.119905	0	0	0	0	0.504949	0.323881	0.107481	antisense	NOVEL	RP11-396J6.1
10304	ENSG00000165828	23.044	5.09798	34.2487	1.15927	4.39758	1.09465e-05	0.00042151	0.0541027	0.0216758	0	0.0975182	1.02966	0.366909	2.98313	protein_coding	KNOWN	PRAP1
3255	ENSG00000108602	1056.51	5.09533	34.186	1.31337	3.87959	0.000104632	0.00278761	0.19442	1.11736	0	0.628368	28.3818	6.6323	14.7787	protein_coding	KNOWN	ALDH3A1
15860	ENSG00000213759	2.66948	5.09531	34.1853	3.64542	1.39773	0.162195	0.475323	0	0	0	0	0	0.218862	0	protein_coding	KNOWN	UGT2B11
7373	ENSG00000142515	44.6207	5.08506	33.9435	1.88757	2.69397	0.00706062	0.0711955	0	0.0680551	0	0	0.0538801	1.41117	0.312203	protein_coding	KNOWN	KLK3
20321	ENSG00000241336	2.63823	5.07731	33.7616	3.13406	1.62004	0.105224	0.384852	0	0	0	0	0.210168	0.337011	0	lincRNA	NOVEL	RP11-451G4.1
12502	ENSG00000178776	2.63567	5.07309	33.663	3.21402	1.57843	0.114468	0.402394	0	0	0	0	0.338135	0.0722948	0	protein_coding	KNOWN	C5orf46
5412	ENSG00000128298	267.788	5.06957	33.5808	0.587945	8.62252	6.54952e-18	2.88226e-15	0.342718	0.147114	0.087881	0.338284	9.99074	5.45775	7.57528	protein_coding	KNOWN	BAIAP2L2
13802	ENSG00000187288	26.0705	5.06345	33.4388	1.13002	4.48084	7.43492e-06	0.000303121	0.013638	0.0218558	0.0652795	0	1.11031	0.173417	1.21237	protein_coding	KNOWN	CIDEC
10850	ENSG00000168314	2.60953	5.06186	33.4019	3.15189	1.60598	0.108279	0.391438	0	0	0	0	0.0180397	0.0361591	0	protein_coding	KNOWN	MOBP
25338	ENSG00000275385	4.40409	5.05897	33.3351	3.35532	1.50775	0.13162	0.430182	0	0.015066	0	0	0	0.589743	0	NA	NA	NA
16604	ENSG00000223392	2.59014	5.05446	33.2311	2.32255	2.17625	0.0295362	0.185829	0	0	0	0	0.124121	0.398065	0.033025	antisense	NOVEL	CLDN10-AS1
20636	ENSG00000243885	4.42982	5.05381	33.216	1.52717	3.30926	0.000935423	0.0157894	0.0262406	0	0	0	0.194211	0.24469	0.383862	lincRNA	NOVEL	RP11-278L15.2
11294	ENSG00000170820	2.59142	5.05276	33.192	3.40249	1.48502	0.137539	0.438827	0	0	0	0	0	0.147509	0.0093241	protein_coding	KNOWN	FSHR
1377	ENSG00000080511	2.58084	5.04622	33.0418	3.17524	1.58924	0.112006	0.398679	0	0	0	0	0.0693957	0.178045	0	protein_coding	KNOWN	RDH8
18753	ENSG00000232756	7.04251	5.04268	32.9609	1.74182	2.89506	0.00379089	0.0457829	0.0114303	0.00915891	0	0	0.108768	0.445723	0.0128622	antisense	NOVEL	RP5-1185I7.1
22364	ENSG00000257062	7.37096	5.03169	32.7106	2.34343	2.14715	0.0317815	0.193436	0.061443	0	0	0	1.20184	0.390645	0	protein_coding	NOVEL	RP11-125O5.2
16714	ENSG00000223918	2.55342	5.03133	32.7026	3.64609	1.37992	0.16761	0.483165	0	0	0	0	0	2.18692	0	pseudogene	KNOWN	RP13-461N9.2
7066	ENSG00000139910	2.54724	5.02452	32.5485	3.15723	1.59143	0.111512	0.397643	0	0	0	0	0	0.0221648	0.0264798	protein_coding	KNOWN	NOVA1
23442	ENSG00000261863	14.548	5.02366	32.5291	2.407	2.0871	0.0368789	0.211892	0	0.0826676	0	0	1.85439	0	0.255406	lincRNA	NOVEL	RP11-141J13.5
16965	ENSG00000224961	10.3613	5.02084	32.4656	1.12151	4.47686	7.57477e-06	0.000307533	0	0.0961058	0.0717628	0	1.39495	1.42345	1.5521	lincRNA	NOVEL	RP1-278O22.1
10734	ENSG00000167798	2.50405	5.00632	32.1405	2.55966	1.95586	0.0504822	0.255317	0	0	0	0	0.00560036	0.0853134	0.00596035	pseudogene	KNOWN	C3P1
14390	ENSG00000197046	120.484	5.00628	32.1395	0.980425	5.10623	3.28644e-07	1.98508e-05	0.0292016	0.169641	0.034944	0.017545	0.671534	4.04738	1.45405	protein_coding	KNOWN	SIGLEC15
332	ENSG00000015413	7140.53	5.00075	32.0167	1.8787	2.66181	0.00777208	0.0759584	0.0575817	0.522911	0	19.4316	140.332	117.509	222.658	protein_coding	KNOWN	DPEP1
13000	ENSG00000182580	4913.38	4.99885	31.9745	1.21634	4.10976	3.96071e-05	0.00125299	3.01385	4.09147	0.0346779	1.18398	13.3713	128.422	57.8756	protein_coding	KNOWN	EPHB3
15117	ENSG00000204187	2.49475	4.99808	31.9574	3.31125	1.50942	0.131191	0.429527	0	0	0	0	0.0495489	0.377403	0	lincRNA	KNOWN	LINC00619
14988	ENSG00000202402	4.27778	4.99419	31.8713	2.38698	2.09226	0.0364153	0.209967	0	0	0	0.312509	6.04938	1.76371	0	misc_RNA	NOVEL	Y_RNA
18574	ENSG00000232013	10.757	4.9897	31.7723	1.68575	2.95993	0.00307704	0.039413	0.0292016	0	0	0.017545	0.710128	0.0123773	0.377888	protein_coding	NOVEL	AC107021.1
2006	ENSG00000100078	67.2041	4.98687	31.7102	1.4436	3.45448	0.000551355	0.0105905	0.0584358	0.00780392	0.116545	0.0117032	0.0205949	3.89689	0.668521	protein_coding	KNOWN	PLA2G3
6538	ENSG00000136542	2724.05	4.98416	31.6506	1.62593	3.06543	0.00217359	0.0303662	2.38089	0.037044	0	0.680525	9.62128	46.6335	17.2974	protein_coding	KNOWN	GALNT5
20592	ENSG00000243539	2.46605	4.98146	31.5915	3.42701	1.45359	0.14606	0.45241	0	0	0	0	0.10173	1.63127	0	misc_RNA	KNOWN	RN7SL649P
14193	ENSG00000196260	22.6709	4.98139	31.5898	0.967543	5.14849	2.62587e-07	1.6178e-05	0.065449	0.0699242	0	0	1.43013	0.721266	1.32566	protein_coding	KNOWN	SFTA2
13780	ENSG00000187134	76.7354	4.97968	31.5525	1.25902	3.95522	7.6464e-05	0.00214866	0.0269711	0.0192102	0.00358609	0.0180054	0.792133	0.812935	0.00674441	protein_coding	KNOWN	AKR1C1
18001	ENSG00000229492	4.21346	4.97722	31.4988	1.9631	2.53539	0.0112324	0.0971264	0.023204	0	0	0	0.0245337	0.118022	0.548326	pseudogene	KNOWN	AC004019.10
23712	ENSG00000264727	2.46506	4.9741	31.4306	3.64672	1.36399	0.17257	0.489616	0	0	0	0	0	0	0.181403	lincRNA	NOVEL	RP11-680C21.1
20544	ENSG00000243141	4.1692	4.96945	31.3295	1.65788	2.99748	0.00272221	0.0358175	0	0.0439398	0	0	0.637774	0.185944	0.802184	pseudogene	KNOWN	RP11-757G14.1
20427	ENSG00000242173	62.9116	4.9689	31.3176	1.57522	3.15442	0.00160819	0.024166	0	0.173299	0.0258807	0	2.56112	2.06259	0.146022	protein_coding	KNOWN	ARHGDIG
15038	ENSG00000203710	2.45576	4.96842	31.3072	3.46365	1.43445	0.151445	0.460711	0	0	0	0	0.00242234	0	0.0386708	protein_coding	KNOWN	CR1
17659	ENSG00000228037	18.8535	4.96577	31.2498	1.36235	3.64502	0.000267374	0.00597928	0.0419599	0.134487	0.050211	0	0.266187	4.62409	0.661028	antisense	NOVEL	RP3-395M20.9
6459	ENSG00000136059	796.492	4.95868	31.0964	0.712026	6.96418	3.30327e-12	6.1671e-10	0.25553	0.458254	0.121341	0.131595	11.5532	2.77819	8.29761	protein_coding	KNOWN	VILL
7275	ENSG00000141527	101.908	4.95443	31.005	1.02283	4.84386	1.27343e-06	6.60683e-05	0.0512025	0.00512845	0.0191472	0.0230727	1.79328	0.284846	0.20526	protein_coding	KNOWN	CARD14
9779	ENSG00000163618	1007.56	4.95055	30.9218	0.872022	5.67709	1.37004e-08	1.20583e-06	0.0556273	0.381029	0.0515351	0.0560629	2.66756	6.20939	3.78402	protein_coding	KNOWN	CADPS
16922	ENSG00000224814	2.42216	4.94918	30.8925	2.3476	2.10819	0.035015	0.205015	0	0	0	0	0.544552	0.0671698	0.0891625	antisense	NOVEL	AC114812.8
23222	ENSG00000260963	2.41981	4.94722	30.8505	2.34218	2.11223	0.0346668	0.203849	0	0	0	0	0.0244258	0.097919	0.285955	lincRNA	NOVEL	RP11-297L17.2
21983	ENSG00000254670	9.01288	4.93658	30.6238	1.46788	3.36307	0.000770806	0.0136956	0	0.0942411	0	0	0.331608	0.963786	1.19112	lincRNA	NOVEL	CTC-497E21.3
11064	ENSG00000169507	2.38415	4.92741	30.4296	2.41257	2.04239	0.0411129	0.225503	0	0	0	0	0.0650285	0.0120318	0.00532374	protein_coding	KNOWN	SLC38A11
14360	ENSG00000196917	4.05477	4.92247	30.3257	2.67452	1.8405	0.0656945	0.297506	0.00550899	0	0	0	0.151442	0	0.00619912	protein_coding	KNOWN	HCAR1
9716	ENSG00000163395	4.02081	4.92207	30.3173	2.37477	2.07265	0.0382051	0.216327	0	0.00173714	0	0	0.0435516	0.018378	0	protein_coding	KNOWN	IGFN1
19938	ENSG00000237974	2.37407	4.92097	30.2943	2.14264	2.29669	0.0216367	0.15239	0	0	0	0	1.43897	0.461488	0.459441	pseudogene	KNOWN	AC000111.4
19169	ENSG00000234568	4.01826	4.91969	30.2673	3.41217	1.4418	0.149357	0.457848	0	0.0137563	0	0	0.490097	0	0	pseudogene	KNOWN	BIN2P1
19576	ENSG00000236306	2.34999	4.91203	30.107	3.45173	1.42306	0.154718	0.464537	0	0	0	0	0.0191137	0.291169	0	lincRNA	NOVEL	RP11-33G16.1
21689	ENSG00000253257	2.34871	4.91025	30.0699	3.22712	1.52156	0.12812	0.423801	0	0	0	0	1.06816	2.39796	0	pseudogene	KNOWN	MTND4P7
20534	ENSG00000243064	2.36114	4.90935	30.0513	2.28978	2.14403	0.0320303	0.194281	0	0	0	0	0.00777061	0.00415348	0.0303237	pseudogene	KNOWN	ABCC13
17255	ENSG00000226258	2.35106	4.90627	29.9872	3.31924	1.47813	0.139372	0.442044	0	0	0	0	0	0.0224615	0.129202	lincRNA	NOVEL	GRM7-AS3
5318	ENSG00000127329	1255.33	4.90528	29.9665	1.45173	3.37892	0.000727709	0.0131382	0.390156	0.0159207	0	0.299529	8.45655	3.10835	4.29072	protein_coding	KNOWN	PTPRB
21543	ENSG00000251393	2.33734	4.90416	29.9433	2.14399	2.2874	0.0221722	0.154967	0	0	0	0	0.245049	0.327453	0.0869335	processed_transcript	NOVEL	RP1-240K6.3
14962	ENSG00000201640	2.34409	4.90239	29.9066	3.32042	1.47644	0.139827	0.442917	0	0	0	0	1.19946	0	0.294592	misc_RNA	KNOWN	RN7SKP28
10330	ENSG00000165953	2.32129	4.89419	29.7371	3.64763	1.34175	0.179678	0.499378	0	0	0	0	0	0.195666	0	protein_coding	KNOWN	SERPINA12
20479	ENSG00000242599	2.32129	4.89419	29.7371	3.64763	1.34175	0.179678	0.499378	0	0	0	0	0	0.589849	0	pseudogene	KNOWN	CSAG4
10099	ENSG00000164816	262.892	4.89	29.6508	3.48835	1.40181	0.160972	0.473446	0	4.82819	0	0	0	100.325	7.1754	protein_coding	KNOWN	DEFA5
8191	ENSG00000149295	90.7971	4.88943	29.6391	1.41994	3.44341	0.000574423	0.0109398	0.00640968	0.128399	0.0153402	0.0308086	0.311742	0.0434686	3.71451	protein_coding	KNOWN	DRD2
13207	ENSG00000183773	528.365	4.88607	29.5703	0.591898	8.25492	1.52001e-16	5.47202e-14	0.1459	0.288371	0.0698362	0.303888	7.88275	5.44198	4.63527	protein_coding	KNOWN	AIFM3
13919	ENSG00000188089	12.0294	4.87749	29.3949	1.49783	3.25638	0.00112844	0.0181879	0.00902177	0.00722898	0	0	0.267086	0.0114718	0.101519	protein_coding	KNOWN	PLA2G4E
5930	ENSG00000132530	2.27192	4.86635	29.1687	2.58005	1.88614	0.0592758	0.280398	0	0	0	0	0.00419836	0.0572238	0.00446824	protein_coding	KNOWN	XAF1
3046	ENSG00000106631	3.87477	4.86601	29.1618	2.46024	1.97786	0.0479441	0.247131	0	0.0144356	0	0	0.419059	0.0763607	0	protein_coding	KNOWN	MYL7
20713	ENSG00000244342	3.90689	4.86235	29.088	1.67137	2.9092	0.00362352	0.0442288	0.00956899	0	0	0	0.0910563	0.032447	0.13998	lincRNA	NOVEL	LINC00698
2447	ENSG00000102445	1244.26	4.86036	29.0479	2.41121	2.01573	0.0438279	0.233837	0	1.70997	0.00514858	0	0.0409418	10.5371	26.8074	protein_coding	KNOWN	KIAA0226L
4889	ENSG00000123496	10.2021	4.8593	29.0265	1.66924	2.91109	0.00360169	0.0440715	0.0161543	0	0.0386619	0	1.00772	0.068471	0.0727119	protein_coding	KNOWN	IL13RA2
17544	ENSG00000227502	12.9259	4.85755	28.9912	1.2843	3.78224	0.000155422	0.00382639	0.00953426	0.00763963	0.0114091	0.0114568	0.685484	0.0565762	0.118015	lincRNA	NOVEL	RP1-249H1.4
23256	ENSG00000261123	93.7285	4.85511	28.9424	0.774902	6.26545	3.71748e-10	4.84728e-08	0.176288	0.459083	0.0527384	0.635505	7.8284	6.38862	14.6299	sense_intronic	NOVEL	RP11-304L19.3
22782	ENSG00000259251	6.48016	4.85016	28.8432	1.33899	3.62225	0.000292048	0.00644913	0.0135957	0	0.0162692	0	0.172498	0.288131	0.152989	antisense	NOVEL	RP11-643M14.1
14897	ENSG00000199283	3.87876	4.84402	28.7208	1.82945	2.6478	0.00810178	0.0781144	0	0	0.192835	0	3.23725	0.409818	0.725335	snRNA	KNOWN	RNU1-58P
16799	ENSG00000224282	3.83451	4.83838	28.6087	3.43523	1.40846	0.158995	0.470826	0.0456022	0	0	0	0	0	1.23156	pseudogene	KNOWN	CTD-2290C23.1
15254	ENSG00000204740	6.4548	4.83783	28.5978	1.48508	3.25762	0.00112349	0.0181437	0.00337577	0	0.00403959	0	0.0249846	0.100159	0.0265906	protein_coding	KNOWN	C10orf112
19458	ENSG00000235721	28.0996	4.83091	28.461	1.66982	2.89307	0.00381493	0.0459058	0	0.0996209	0	0	0.597508	0.210787	1.41173	pseudogene	KNOWN	AC013268.3
22100	ENSG00000255274	6.43695	4.82462	28.3371	1.44318	3.34306	0.000828608	0.0144619	0.00696919	0	0	0.00837448	0.176846	0.0413551	0.0941068	antisense	NOVEL	TMPRSS4-AS1
9846	ENSG00000163827	121.406	4.82076	28.2614	1.41976	3.39548	0.000685084	0.0125154	0.00467216	0.168467	0	0.0112285	0.696527	0.843619	2.41843	protein_coding	KNOWN	LRRC2
14029	ENSG00000188738	138.325	4.81222	28.0947	1.03423	4.65294	3.2724e-06	0.00014962	0.0223605	0.0125419	0.00267575	0.0134347	0.884208	0.128896	0.0654203	protein_coding	KNOWN	FSIP2
19524	ENSG00000236039	6.49828	4.80849	28.0221	1.64176	2.92887	0.00340192	0.0421291	0	0	0.028165	0	0.0622137	0.309261	0.158911	lincRNA	NOVEL	AC019117.2
19949	ENSG00000238005	65.4628	4.80767	28.0062	1.41564	3.39611	0.000683502	0.0124983	0.0315329	0.303201	0	0	2.56718	1.33654	3.29992	lincRNA	NOVEL	RP11-443B7.1
5470	ENSG00000128815	16.6946	4.8046	27.9466	1.8321	2.62246	0.00872983	0.0822079	0.00192037	0.00615504	0.002298	0	0.209134	0.0146513	0	protein_coding	KNOWN	WDFY4
10011	ENSG00000164363	5.75934	4.79936	27.8454	1.87824	2.55525	0.0106113	0.0939989	0	0.0198465	0	0	0.0654695	0.0314947	0.404132	protein_coding	KNOWN	SLC6A18
13951	ENSG00000188293	223.136	4.79422	27.7461	2.355	2.03576	0.0417749	0.227765	0	2.54537	0	0	39.7261	13.2037	0.192181	protein_coding	KNOWN	IGFL1
13840	ENSG00000187658	16.3074	4.79375	27.7372	1.22849	3.90214	9.53473e-05	0.00259353	0.0382899	0.153405	0	0	2.34808	1.46065	0.560125	protein_coding	KNOWN	C5orf52
17702	ENSG00000228184	5.57558	4.78671	27.6022	3.36324	1.42324	0.154666	0.464537	0	0.0141209	0	0	0.344707	0	0	pseudogene	KNOWN	SNX19P1
1733	ENSG00000090402	3.73812	4.78623	27.593	2.05401	2.33019	0.0197964	0.143578	0	0	0.0051209	0	0.00452463	0.0108831	0.0963095	protein_coding	KNOWN	SI
22676	ENSG00000258788	3.66822	4.78008	27.4755	1.62214	2.94677	0.00321113	0.0405694	0	0.0876965	0	0	0.810022	0.55667	1.47787	pseudogene	KNOWN	RP11-404P21.9
9598	ENSG00000162881	20.7123	4.77385	27.3572	1.84782	2.58351	0.00978011	0.0887739	0.0147484	0.0354528	0	0.0531669	2.01157	0	0.116172	protein_coding	KNOWN	OXER1
19507	ENSG00000235939	5.83335	4.74794	26.8703	1.61084	2.94749	0.00320369	0.0405504	0.0603836	0.0483843	0	0	1.85148	0.204752	0.407688	antisense	NOVEL	RP11-123B3.2
22087	ENSG00000255203	3.63773	4.74757	26.8634	1.56045	3.04243	0.00234675	0.0321296	0	0	0	0.0355044	0.249918	0.200376	0.299231	pseudogene	KNOWN	OR7E2P
13443	ENSG00000185156	14.7357	4.7417	26.7542	1.77796	2.66693	0.00765483	0.0752176	0	0.0577162	0	0	0.888506	0.305303	0.0405266	protein_coding	KNOWN	MFSD6L
9455	ENSG00000162078	377.244	4.73979	26.7188	0.998153	4.74856	2.04874e-06	9.86118e-05	0.827924	0.16585	0.058972	0.236874	2.1259	17.1868	6.55475	protein_coding	KNOWN	ZG16B
16105	ENSG00000214814	83.8003	4.73471	26.625	1.24862	3.79196	0.000149461	0.00370182	0.0955001	0	0.0155836	0.0156487	0.197356	1.18491	1.14791	protein_coding	KNOWN	FER1L6
12185	ENSG00000176532	1520.17	4.73288	26.5913	0.742265	6.37627	1.81453e-10	2.47374e-08	2.25296	1.17873	0.713645	2.88243	73.8303	13.3915	52.8961	protein_coding	KNOWN	PRR15
20222	ENSG00000240541	17.9839	4.71645	26.2902	1.16836	4.03681	5.41826e-05	0.00162048	0.0282136	0.135642	0	0	1.49152	0.621844	1.42866	antisense	NOVEL	TM4SF1-AS1
15097	ENSG00000204099	40.8927	4.71445	26.2537	1.49806	3.14704	0.00164933	0.0245744	0.0112396	0.0675455	0	0	1.14083	0.0857514	0.373103	protein_coding	KNOWN	NEU4
3220	ENSG00000108405	16.3473	4.71078	26.1869	2.44901	1.92354	0.0544119	0.266533	0	0.0371109	0	0	0.68556	0.0673051	0	protein_coding	KNOWN	P2RX1
22651	ENSG00000258689	18.47	4.70851	26.1459	1.21651	3.87052	0.000108602	0.00286858	0.0436327	0.17481	0.0522128	0	4.15199	0.628796	0.834677	lincRNA	NOVEL	RP6-65G23.1
26164	ENSG00000282998	5.47677	4.70692	26.117	1.54866	3.03935	0.00237086	0.0324058	0	0.0200832	0	0	0.0927506	0.148729	0.239731	NA	NA	NA
7476	ENSG00000143318	3.49639	4.70139	26.0172	2.50173	1.87925	0.0602098	0.282711	0.0120712	0	0	0	0.255259	0.0409316	0	protein_coding	KNOWN	CASQ1
1874	ENSG00000095585	69.1284	4.69495	25.9012	1.35096	3.47527	0.000510342	0.00998163	0.0718656	0.0115169	0	0.0949925	0.113976	0.530016	2.80613	protein_coding	KNOWN	BLNK
25907	ENSG00000279693	5.399	4.69033	25.8185	1.64993	2.84275	0.00447256	0.0513375	0	0.0143275	0	0	0.179602	0.0378945	0.120725	NA	NA	NA
1024	ENSG00000070190	98.5829	4.69006	25.8136	1.6336	2.87099	0.00409182	0.0482785	0.121285	0	0	0.0832808	0.0915969	1.54222	2.32014	protein_coding	KNOWN	DAPP1
12483	ENSG00000178662	86.5139	4.67732	25.5867	2.18734	2.13836	0.0324874	0.196086	0.0501715	0.0150756	0	0	0.139248	1.11644	0	protein_coding	KNOWN	CSRNP3
23234	ENSG00000261037	3.39752	4.67628	25.5682	2.67929	1.74534	0.0809251	0.334617	0	0.0064661	0	0	0	0.184701	0.00908061	lincRNA	NOVEL	CTC-471C19.1
10716	ENSG00000167749	51.8799	4.67506	25.5466	1.47729	3.16462	0.00155288	0.0235351	0.135746	0.0217542	0	0.097871	0.0430576	0.690443	4.15484	protein_coding	KNOWN	KLK4
14754	ENSG00000198626	119.471	4.67473	25.5408	1.26043	3.70884	0.000208215	0.00483168	0.00147758	0.0390705	0.0212176	0.00177552	0.902982	0.0551127	0.267691	protein_coding	KNOWN	RYR2
9680	ENSG00000163220	45.0712	4.67406	25.5289	1.86314	2.5087	0.0121177	0.102622	0	0.729538	0	0	11.0222	1.54362	1.69046	protein_coding	KNOWN	S100A9
19302	ENSG00000235142	3.40171	4.67268	25.5045	1.80745	2.58523	0.00973141	0.0885732	0	0.00318414	0	0	0.0630231	0.0235806	0.00894323	lincRNA	KNOWN	RP1-60O19.1
20981	ENSG00000248307	3.38821	4.67233	25.4984	2.67942	1.74378	0.0811967	0.335234	0	0.00889944	0	0	0.011743	0.254209	0	lincRNA	NOVEL	LINC00616
10345	ENSG00000166035	3.40825	4.66074	25.2943	1.8706	2.49158	0.0127177	0.106134	0.00506691	0	0	0	0.0910739	0.0128859	0.017105	protein_coding	KNOWN	LIPC
12732	ENSG00000180532	3.41365	4.65751	25.2377	3.45054	1.34979	0.177082	0.495778	0	0	0.013976	0	0	0.277221	0	protein_coding	KNOWN	ZSCAN4
9086	ENSG00000158786	5.48691	4.65747	25.2371	2.11607	2.201	0.0277357	0.178978	0	0.00326819	0	0.00490115	0.137998	0.0172879	0	protein_coding	KNOWN	PLA2G2F
2429	ENSG00000102287	147.644	4.65447	25.1846	1.0041	4.63545	3.56165e-06	0.000161645	0.0737834	0.0503626	0	0.0229862	1.29153	0.493428	1.01477	protein_coding	KNOWN	GABRE
18451	ENSG00000231482	3.32698	4.64249	24.9764	2.3944	1.9389	0.0525139	0.261234	0	0.0379228	0	0	0.550439	0.561685	0	lincRNA	NOVEL	AC141930.2
3920	ENSG00000114638	5.78228	4.63983	24.9304	2.00462	2.31456	0.0206368	0.147514	0.0115917	0	0.0138712	0	0.441217	0.00982647	0.0130439	protein_coding	KNOWN	UPK1B
8283	ENSG00000150594	68.3889	4.63782	24.8956	1.71925	2.69758	0.0069845	0.0707755	0.00701385	0.168602	0	0	0.155732	2.5091	0.662969	protein_coding	KNOWN	ADRA2A
7028	ENSG00000139626	124.995	4.63455	24.8392	1.06141	4.36639	1.26318e-05	0.000478186	0.035171	0.164394	0.00701453	0.0633945	2.38614	2.42495	0.270442	protein_coding	KNOWN	ITGB7
6049	ENSG00000133321	56.849	4.63008	24.7624	1.51411	3.05796	0.0022285	0.0308391	0.0808834	0.340254	0	0	1.81727	5.72525	0.432325	protein_coding	KNOWN	RARRES3
22417	ENSG00000257408	12.6491	4.62961	24.7544	1.28553	3.60132	0.000316608	0.00685631	0.0788795	0.0948071	0	0	1.9599	0.267469	1.24265	pseudogene	KNOWN	RP11-645C24.4
18495	ENSG00000231691	5.38586	4.62084	24.6043	1.45187	3.18267	0.00145924	0.0224619	0.0588943	0.047191	0	0	0.435886	0.44933	1.32544	antisense	NOVEL	RP11-203F10.5
17524	ENSG00000227411	3.29935	4.6205	24.5986	2.68216	1.72268	0.0849467	0.342765	0.0214423	0	0	0	0.0226712	0.472601	0	pseudogene	KNOWN	BAATP1
19510	ENSG00000235949	3.27322	4.61482	24.5018	2.42124	1.90597	0.056654	0.272479	0	0.0487203	0	0	0	0.515435	0.889458	antisense	NOVEL	AC061961.2
21683	ENSG00000253226	3.29827	4.60513	24.3379	3.46497	1.32905	0.183831	0.503369	0	0	0	0.0476789	0	0.908162	0	pseudogene	KNOWN	HAUS1P3
7621	ENSG00000144057	3.24345	4.60511	24.3375	3.47581	1.3249	0.185203	0.505331	0	0.00273056	0	0	0	0.0779973	0	protein_coding	KNOWN	ST6GAL2
11199	ENSG00000170298	5.28448	4.59788	24.2158	2.10197	2.18741	0.0287124	0.1823	0	0.00788283	0	0.0118215	0	0.0500377	0.309965	protein_coding	KNOWN	LGALS9B
20040	ENSG00000239028	5.0177	4.59284	24.1314	1.90919	2.40564	0.016144	0.125322	0	0.513346	0	0	2.03211	0.543092	8.65094	miRNA	NOVEL	AL359955.1
11544	ENSG00000172201	185.058	4.58731	24.0391	2.29739	1.99675	0.0458527	0.240225	0.661154	0	0	0.134656	7.8909	6.45965	0	protein_coding	KNOWN	ID4
8264	ENSG00000150244	4.862	4.58364	23.9781	3.3859	1.35374	0.175818	0.493788	0	0.029131	0	0	0	0.616382	0	protein_coding	KNOWN	TRIM48
14749	ENSG00000198610	6.97329	4.5807	23.9292	1.64537	2.78399	0.00536945	0.0585681	0	0.0329893	0	0	0.0580401	0.407177	0.200755	protein_coding	KNOWN	AKR1C4
14978	ENSG00000202217	3.18173	4.569	23.736	2.72381	1.67743	0.0934579	0.361605	0	0.0641682	0	0	0.0846713	0	1.71217	misc_RNA	KNOWN	RN7SKP47
22347	ENSG00000256969	3.19757	4.56279	23.634	1.79526	2.54158	0.0110353	0.0962192	0	0	0.0534559	0	0.28339	0.605899	0.100535	lincRNA	NOVEL	RP11-320N7.2
18563	ENSG00000231969	3.12227	4.54495	23.3435	2.47055	1.83965	0.0658197	0.297735	0	0.0205941	0	0	0.434789	0.130725	0	antisense	NOVEL	AC144449.1
15904	ENSG00000213892	36.8694	4.54439	23.3345	1.05597	4.30353	1.68101e-05	0.000612558	0.0775749	0.0372956	0.0185659	0.0932174	3.05117	0.236741	0.663426	protein_coding	KNOWN	CEACAM16
7444	ENSG00000143153	15620.7	4.54222	23.2994	0.602015	7.54503	4.52173e-14	1.1488e-11	20.148	7.42549	15.4083	11.7857	225.581	567.412	163.993	protein_coding	KNOWN	ATP1B1
491	ENSG00000036473	82.3335	4.54168	23.2906	1.81714	2.49936	0.0124419	0.104363	0.281727	0	0	0.25888	0.0525656	1.44699	7.92548	protein_coding	KNOWN	OTC
14987	ENSG00000202395	5.0599	4.53435	23.1726	1.99731	2.27023	0.0231938	0.159662	0	0.0685576	0.102385	0	0	1.4506	1.54045	misc_RNA	KNOWN	RN7SKP1
10860	ENSG00000168398	196.472	4.52579	23.0356	1.43657	3.15041	0.0016304	0.0244104	0.111284	0.00614965	0	0.184446	0.223151	2.33891	2.64268	protein_coding	KNOWN	BDKRB2
16147	ENSG00000215018	26.198	4.52465	23.0173	0.943256	4.79684	1.61187e-06	8.07379e-05	0.0119052	0.00635962	0.00949753	0.0143058	0.394408	0.0504611	0.272398	protein_coding	KNOWN	COL28A1
21247	ENSG00000249853	3.06616	4.52075	22.9551	2.4179	1.8697	0.0615258	0.286191	0	0.00512845	0	0	0.067671	0.0705332	0	protein_coding	KNOWN	HS3ST5
10753	ENSG00000167914	61.735	4.51435	22.8536	1.55153	2.9096	0.00361891	0.0442015	0	0.26853	0	0.0138862	1.68612	0.940436	2.30165	protein_coding	KNOWN	GSDMA
16263	ENSG00000215853	3.04002	4.51084	22.798	2.69904	1.67127	0.0946674	0.3643	0	0.00589722	0	0	0.0077815	0.149735	0	protein_coding	KNOWN	RPTN
5422	ENSG00000128422	1009.73	4.51048	22.7923	1.77693	2.53836	0.0111374	0.0967466	0.0931817	4.09827	0.0123895	0.0124412	52.3041	18.5893	1.24661	protein_coding	KNOWN	KRT17
23564	ENSG00000263154	3.08875	4.50564	22.716	1.63288	2.75931	0.00579227	0.0617921	0	0	0.0472663	0	0.208813	0.368323	0.266683	lincRNA	NOVEL	RP11-1055B8.2
25550	ENSG00000277493	5.5064	4.49719	22.5835	2.43798	1.84464	0.06509	0.296229	0	0	0.359224	0	0	4.32612	1.35119	NA	NA	NA
20324	ENSG00000241359	8.83746	4.49512	22.5511	1.38627	3.2426	0.00118444	0.018905	0	0.150876	0	0	0.895877	1.19714	0.794553	antisense	NOVEL	SYNPR-AS1
6695	ENSG00000137491	236.173	4.48913	22.4575	1.551	2.89435	0.00379949	0.0457829	0.00507523	0.00610004	0	0.234797	1.54275	0.815294	1.77327	protein_coding	KNOWN	SLCO2B1
23328	ENSG00000261418	3.03214	4.48652	22.417	3.5273	1.27194	0.203394	0.529353	0.0356887	0	0	0	0.754679	0	0	pseudogene	KNOWN	RP11-529J17.3
14530	ENSG00000197632	6.96325	4.47342	22.2144	1.9315	2.31604	0.0205561	0.147263	0	0.0153182	0	0.011486	0.232445	0.226881	0	protein_coding	KNOWN	SERPINB2
8826	ENSG00000156222	3.00344	4.47168	22.1876	2.72427	1.64143	0.100709	0.376611	0.00762464	0	0	0	0.15317	0.00646351	0	protein_coding	KNOWN	SLC28A1
23905	ENSG00000266554	4.5138	4.47155	22.1855	3.41178	1.31062	0.189986	0.512116	0	0.018503	0	0	0	0.362141	0	lincRNA	NOVEL	RP11-527H14.2
6595	ENSG00000136881	41.949	4.46703	22.1162	0.951074	4.69683	2.64228e-06	0.000124268	0.0387531	0.00621044	0.0741979	0.018627	0.573636	1.39291	0.270369	protein_coding	KNOWN	BAAT
1634	ENSG00000088340	553.87	4.46328	22.0588	1.16553	3.82941	0.000128449	0.00329397	0.234759	0.0928927	0.107513	0.233339	10.2349	0.191637	0.629436	pseudogene	KNOWN	FER1L4
17884	ENSG00000228917	7.57133	4.46292	22.0533	1.82908	2.43999	0.0146878	0.117598	0	0.0189785	0	0.0569223	1.12691	0.080313	0.0266523	antisense	NOVEL	RP11-544M22.8
10190	ENSG00000165215	3408.71	4.45429	21.9218	0.734725	6.06253	1.33996e-09	1.4942e-07	13.5458	6.32737	2.6399	6.91224	158.001	55.5971	270.285	protein_coding	KNOWN	CLDN3
25727	ENSG00000279017	27.0603	4.45365	21.912	1.15756	3.84745	0.000119353	0.00310143	0.0768787	0.0616015	0.0919964	0.0615871	0.162569	4.06233	0.547893	NA	NA	NA
13365	ENSG00000184774	2.93383	4.44464	21.7756	1.96194	2.26543	0.0234862	0.16099	0	0.0074901	0	0	0.0691834	0.00792412	0.115705	protein_coding	NOVEL	RP11-480I12.4
16541	ENSG00000221923	62.5571	4.44387	21.764	1.19032	3.73335	0.000188953	0.00448608	0	0.0679124	0.109873	0.00848707	1.71009	0.329302	1.00141	protein_coding	KNOWN	ZNF880
21261	ENSG00000249916	6.64541	4.4437	21.7614	1.70202	2.61083	0.00903216	0.0839996	0.0466552	0.0747679	0	0	1.57852	0.0395502	0.524998	antisense	NOVEL	CTD-2280E9.1
11338	ENSG00000171060	7.44629	4.44197	21.7353	1.64573	2.69909	0.00695299	0.0705896	0.00982674	0	0.00587955	0	0.0363646	0.204091	0.0110578	protein_coding	KNOWN	C8orf74
9337	ENSG00000160868	38.7192	4.44008	21.7068	0.903264	4.91559	8.85145e-07	4.83955e-05	0.0167252	0.093811	0.010007	0.0100488	0.963759	0.574215	0.696353	protein_coding	KNOWN	CYP3A4
11684	ENSG00000173077	4.73313	4.43423	21.619	2.31273	1.91731	0.0551982	0.268155	0	0.00447146	0	0.00670563	0.177006	0.00473057	0	protein_coding	KNOWN	2018-12-01
15350	ENSG00000205420	663.97	4.43332	21.6054	2.15923	2.0532	0.0400534	0.222202	0.0358837	2.45838	0	0.0323396	38.2911	2.67688	0.0100947	protein_coding	KNOWN	KRT6A
8833	ENSG00000156269	4.72141	4.43231	21.5902	1.79827	2.46476	0.0137107	0.111698	0	0.00779236	0	0.0116858	0.0411287	0.263805	0.0109431	protein_coding	KNOWN	NAA11
11156	ENSG00000170011	231.27	4.42812	21.5277	1.20363	3.67896	0.000234186	0.00534377	0.384699	0.0179216	0.0214115	0.0161257	1.05943	3.62518	2.43124	protein_coding	KNOWN	MYRIP
25468	ENSG00000276644	621.817	4.42615	21.4983	1.68705	2.6236	0.00870056	0.0819693	0.00487416	0.855322	0.431615	0	2.52521	1.67342	16.6463	NA	NA	NA
8207	ENSG00000149488	25.0218	4.42441	21.4724	1.1975	3.69471	0.000220137	0.00507844	0.0212903	0.00426488	0.00636922	0.0255833	0.275752	0.0225601	0.616902	protein_coding	KNOWN	TMC2
10677	ENSG00000167617	346.567	4.417	21.3624	0.620851	7.11443	1.12374e-12	2.25261e-10	0.465415	2.0278	1.28791	0.524309	25.281	19.0365	25.0076	protein_coding	KNOWN	CDC42EP5
21726	ENSG00000253417	2.91001	4.41688	21.3605	2.5999	1.69887	0.0893445	0.352485	0	0	0	0.0135873	0	0.201293	0.0254476	lincRNA	NOVEL	RP11-109J4.1
12936	ENSG00000182179	353.657	4.41142	21.2799	1.27043	3.47238	0.000515862	0.0100656	0.0693515	0.703888	0.0484103	0.0555571	0.232199	6.43753	7.38122	protein_coding	KNOWN	UBA7
9186	ENSG00000159708	18.5606	4.40871	21.24	0.919617	4.79408	1.63426e-06	8.1528e-05	0.0196168	0.0157186	0	0.0157149	0.235064	0.144122	0.456201	protein_coding	KNOWN	LRRC36
8564	ENSG00000153246	91.5504	4.40596	21.1995	1.62406	2.71292	0.00666923	0.0684819	0.020525	0.0465979	0	0	0.128399	0.0608976	0.88728	protein_coding	KNOWN	PLA2R1
20379	ENSG00000241794	2.86798	4.40051	21.1196	2.21005	1.99113	0.0464661	0.241993	0.0370478	0	0	0	0.665905	0.0314059	0.0416888	protein_coding	KNOWN	SPRR2A
24092	ENSG00000267452	2.88757	4.39944	21.1039	2.48034	1.77372	0.0761092	0.323438	0	0	0	0.0101327	0.124819	0.0428895	0	lincRNA	NOVEL	RP11-1018N14.5
12537	ENSG00000179031	35.0869	4.39771	21.0786	0.851956	5.16189	2.44463e-07	1.5137e-05	0.202572	0.108212	0.0404011	0.16228	3.3912	3.94964	0.797821	pseudogene	KNOWN	LL0XNC01-131B10.2
11045	ENSG00000169385	5.11478	4.38497	20.8933	2.33959	1.87425	0.0608965	0.284087	0	0	0.0416319	0.0418058	1.1771	0	0.0391489	protein_coding	KNOWN	RNASE2
15779	ENSG00000213489	30.4471	4.3841	20.8807	1.1083	3.9557	7.63097e-05	0.00214678	0.210135	0.093543	0	0	1.80211	1.32611	1.76031	pseudogene	KNOWN	RP13-147D17.1
7912	ENSG00000146477	69.9395	4.38108	20.837	2.0278	2.16051	0.0307332	0.190442	0	0.238887	0	0	0.199084	0.69168	2.87805	protein_coding	KNOWN	SLC22A3
13734	ENSG00000186810	4.57878	4.38077	20.8326	2.32019	1.88811	0.0590118	0.279455	0	0.0112672	0	0.0168969	0.0148673	0	0.427221	protein_coding	KNOWN	CXCR3
3009	ENSG00000106384	97.1291	4.37832	20.7972	2.03535	2.15114	0.031465	0.192409	0	0.502931	0	0	2.22879	0.592309	5.07726	protein_coding	KNOWN	MOGAT3
26197	ENSG00000283403	4.32564	4.37496	20.7489	1.81346	2.41249	0.0158438	0.12393	0	0.0135221	0	0	0.0267641	0.178821	0.0474741	NA	NA	NA
19491	ENSG00000235888	88.6484	4.37253	20.714	1.91281	2.28593	0.0222586	0.155164	0	0.700579	0	0.0223537	0.885091	0.346933	10.0897	lincRNA	NOVEL	AF064858.8
20280	ENSG00000240990	444.433	4.36936	20.6685	0.817366	5.34566	9.00869e-08	6.43018e-06	0.270143	1.14724	0.193959	0.151487	7.15964	6.58767	13.7198	antisense	KNOWN	HOXA11-AS
2191	ENSG00000100739	6.85276	4.36859	20.6574	1.92135	2.2737	0.0229838	0.158703	0.0285717	0	0	0	0.0100697	0.29872	0.139321	protein_coding	KNOWN	BDKRB1
341	ENSG00000016402	1198.93	4.3662	20.6232	0.839049	5.20374	1.95315e-07	1.25675e-05	0.583091	1.26372	0.877175	0.226883	25.817	16.886	2.97449	protein_coding	KNOWN	IL20RA
19662	ENSG00000236699	185.511	4.36307	20.5786	0.797269	5.47252	4.43689e-08	3.38522e-06	0.0173287	0.158291	0.0373253	0.070798	0.743865	1.85091	1.81736	protein_coding	KNOWN	ARHGEF38
22323	ENSG00000256751	18.7274	4.35987	20.5329	1.22118	3.57022	0.000356688	0.00758431	0	0.247198	0.105477	0	2.79586	0.747208	2.1325	antisense	NOVEL	RP11-695J4.2
16702	ENSG00000223863	7.93942	4.35557	20.4718	1.5361	2.83546	0.00457593	0.0521838	0	0.147183	0	0	0.339869	1.24569	0.930127	lincRNA	NOVEL	AC008074.4
22061	ENSG00000255093	5.56738	4.34988	20.3912	3.37123	1.29029	0.196949	0.521054	0	0.0118531	0	0	0	0	0.188652	protein_coding	PUTATIVE	RP11-794P6.2
23325	ENSG00000261402	2.78943	4.34553	20.3298	1.84738	2.35227	0.0186593	0.13808	0	0	0.00817692	0	0.0866977	0.028963	0.0153785	lincRNA	NOVEL	RP11-378I6.1
17990	ENSG00000229422	4.19047	4.34352	20.3016	2.40655	1.80487	0.0710947	0.311254	0	0.0673509	0	0	0.577661	0.641283	0	pseudogene	KNOWN	RP11-262H14.5
15539	ENSG00000207922	2.71796	4.33949	20.2449	2.45704	1.76615	0.0773713	0.326329	0	0.223906	0	0	2.95449	2.36881	0	miRNA	KNOWN	MIR566
9550	ENSG00000162654	5.62803	4.33834	20.2289	2.56693	1.69009	0.0910111	0.356125	0	0.0103055	0	0	0	0.156271	0.00964824	protein_coding	KNOWN	GBP4
25648	ENSG00000278531	4.17449	4.33589	20.1945	2.52147	1.71959	0.0855078	0.34417	0	0.047726	0	0	0.69273	0	0.167559	NA	NA	NA
10306	ENSG00000165837	16.2013	4.33554	20.1895	1.34169	3.2314	0.00123185	0.0195352	0.00893431	0.0143178	0.0213824	0.0214717	0.887954	0.0227212	0.0804283	protein_coding	KNOWN	FAM194B
20875	ENSG00000246763	105.098	4.33465	20.1771	1.01455	4.27247	1.93318e-05	0.000687466	0.212914	0.143667	0.067048	0.107725	0.165875	2.46987	5.43483	antisense	NOVEL	RGMB-AS1
15420	ENSG00000205847	11.127	4.32926	20.1019	1.15956	3.73354	0.000188809	0.00448608	0.0909938	0.0243039	0	0.0364473	0.865876	1.20847	0.238916	pseudogene	KNOWN	OR7E91P
8681	ENSG00000154556	411.556	4.32719	20.073	1.78431	2.42513	0.0153028	0.120989	0.00157005	0.288093	0.00375757	0	0.449866	2.41967	1.55649	protein_coding	KNOWN	SORBS2
14071	ENSG00000188993	49.9254	4.32261	20.0095	0.784706	5.50857	3.61751e-08	2.85441e-06	0.110531	0.0126523	0.0377903	0.0189741	0.943269	0.742895	1.01279	protein_coding	KNOWN	LRRC66
17455	ENSG00000227115	6.9173	4.32244	20.007	1.87784	2.30182	0.0213456	0.151174	0.00391897	0	0	0.0023546	0.00414355	0.0863762	0.00220495	lincRNA	NOVEL	RP11-267C16.1
8956	ENSG00000157554	19.3909	4.31621	19.9209	1.25816	3.43058	0.000602301	0.0113133	0	0.0138687	0	0.0166386	0.0475802	0.275841	0.136335	protein_coding	KNOWN	ERG
23521	ENSG00000262714	120.932	4.31449	19.8972	0.80636	5.35058	8.76743e-08	6.28094e-06	0.171679	0.324256	0.0146742	0.16209	2.60607	2.55725	4.99523	lincRNA	NOVEL	RP11-44F14.8
22910	ENSG00000259721	2.66313	4.31018	19.8378	3.56682	1.20841	0.22689	0.557521	0	0.01211	0	0	0	0.281858	0	lincRNA	NOVEL	RP11-758N13.1
16691	ENSG00000223806	2.71382	4.30737	19.7992	2.47841	1.73796	0.0822186	0.337362	0	0	0	0.0160058	0	0.158081	0.0899312	lincRNA	KNOWN	LINC00114
22965	ENSG00000259933	79.7813	4.30362	19.7478	0.767396	5.60808	2.04581e-08	1.73852e-06	0.456154	0.30459	0.0454878	0.593812	6.83252	3.60909	10.3087	sense_overlapping	NOVEL	RP11-304L19.1
20833	ENSG00000246022	5.89745	4.29959	19.6927	2.11935	2.02873	0.0424856	0.229608	0.00966049	0.0154816	0	0	0.0306423	0.36033	0	antisense	NOVEL	ALDH1L1-AS2
21541	ENSG00000251381	4.11007	4.29897	19.6842	1.92719	2.23069	0.0257018	0.170692	0	0.014667	0	0	0.00967672	0.147411	0.102987	lincRNA	NOVEL	LINC00958
8561	ENSG00000153233	106.287	4.29534	19.6348	1.02893	4.17456	2.98566e-05	0.000990292	0.158357	0.00818637	0.00611281	0.0797986	1.32326	1.30344	1.08641	protein_coding	KNOWN	PTPRR
12315	ENSG00000177455	23.6915	4.29477	19.6271	1.21061	3.54761	0.000388746	0.00811198	0.029067	0.0621089	0	0.0116427	0.921983	0.0739215	0.577846	protein_coding	KNOWN	CD19
4934	ENSG00000124102	113.795	4.28737	19.5266	2.17329	1.97275	0.0485242	0.248872	0	2.40748	0	0	1.58836	4.1292	29.7111	protein_coding	KNOWN	PI3
15068	ENSG00000203857	33.2749	4.28496	19.494	1.79404	2.38844	0.0169202	0.129393	0	0.163691	0	0	0.920813	0.246092	1.28247	protein_coding	KNOWN	HSD3B1
16102	ENSG00000214788	2.66652	4.28492	19.4935	1.97981	2.16431	0.0304402	0.189236	0	0	0	0.0248531	0.0218679	0.262994	0.0930941	protein_coding	KNOWN	OOSP1
12630	ENSG00000179772	10.7513	4.28481	19.4921	1.80908	2.3685	0.0178603	0.134479	0.0597427	0.0159569	0	0.0239298	0.147388	1.31676	0	protein_coding	KNOWN	FOXS1
12479	ENSG00000178623	1030.7	4.2807	19.4366	1.39748	3.06316	0.00219015	0.0305283	0.061938	2.33674	0.0185294	0.0744274	15.908	11.8138	8.64244	protein_coding	KNOWN	GPR35
25915	ENSG00000279741	27.3979	4.27726	19.3903	1.36817	3.12627	0.0017704	0.0259701	0	0.434602	0	0.0465537	1.96617	1.90483	3.40041	NA	NA	NA
20415	ENSG00000242110	311.685	4.2767	19.3827	0.874844	4.88853	1.01594e-06	5.4192e-05	0.184596	0.22622	0.16892	0.215294	1.41214	0.731794	9.42073	protein_coding	KNOWN	AMACR
814	ENSG00000064270	1563.08	4.2726	19.3277	1.21448	3.51805	0.000434735	0.00883962	1.89356	0.188944	0.0213766	0.52806	3.3582	11.5604	23.2374	protein_coding	KNOWN	ATP2C2
26182	ENSG00000283167	2.61561	4.27124	19.3095	1.90391	2.24341	0.0248705	0.16696	0	0.00902537	0	0	0.0476367	0.0190967	0.139422	NA	NA	NA
21609	ENSG00000251665	2.61902	4.2709	19.3049	1.79317	2.38175	0.0172304	0.130981	0.0213726	0	0	0	0.158182	0.181178	0.0480999	lincRNA	NOVEL	RP11-700H6.2
18261	ENSG00000230650	80.1889	4.27047	19.2992	1.51564	2.8176	0.00483836	0.054479	0	0.195006	0	0.12101	1.09137	0.419725	3.08794	pseudogene	KNOWN	AC112229.1
26217	ENSG00000283654	2.58975	4.2628	19.1969	1.68267	2.53336	0.0112975	0.0975531	0	0.00792439	0	0	0.0731947	0.0503015	0.0556427	NA	NA	NA
17322	ENSG00000226519	2.63604	4.25906	19.1472	1.97344	2.15819	0.0309128	0.191103	0	0	0	0.0928335	0.980194	0.327453	0.0869335	lincRNA	NOVEL	LINC00390
6030	ENSG00000133135	2224.45	4.25872	19.1426	1.42249	2.99385	0.00275478	0.0360726	3.53593	0.551936	0	4.0098	31.8749	41.5361	42.8375	protein_coding	KNOWN	RNF128
9067	ENSG00000158560	205.966	4.25808	19.1342	1.71565	2.4819	0.0130683	0.108072	0.0460015	0.234984	0.261475	0.020729	7.62397	0.463079	0	protein_coding	KNOWN	DYNC1I1
2879	ENSG00000105650	110.552	4.25402	19.0804	0.623804	6.81949	9.13652e-12	1.56361e-09	0.0554153	0.0296022	0.0110521	0.0665895	0.908162	0.555887	0.859146	protein_coding	KNOWN	PDE4C
16200	ENSG00000215267	9.93036	4.25372	19.0764	1.68706	2.52138	0.0116895	0.0999568	0.0293485	0.0705492	0	0.0352664	1.39637	0.597098	0	pseudogene	KNOWN	AKR1C7P
25340	ENSG00000275395	1191.89	4.249	19.0141	1.20907	3.51428	0.000440946	0.00892639	0.526562	0.215868	0.0146537	0.407112	0.74016	14.1058	1.75691	NA	NA	NA
14277	ENSG00000196553	67.8297	4.24528	18.9652	0.922422	4.60232	4.17815e-06	0.000184859	0.222444	0.0297067	0.0665464	0.289573	2.54791	0.958556	5.06877	processed_transcript	KNOWN	LINC00238
21309	ENSG00000250208	81.9748	4.23922	18.8857	2.21305	1.91556	0.0554215	0.268858	0	0.0896948	0	0	0.130431	1.12709	0.0205652	processed_transcript	NOVEL	FZD10-AS1
11055	ENSG00000169435	420.498	4.23885	18.8808	1.28743	3.2925	0.000993008	0.0164432	0.396063	0.130117	0	0.276037	0.73283	5.17387	5.4551	protein_coding	KNOWN	RASSF6
12497	ENSG00000178750	77.7599	4.23693	18.8558	0.789773	5.36475	8.10634e-08	5.893e-06	0.38561	0.163579	0.244291	0.0545137	1.63084	3.46116	6.94267	protein_coding	KNOWN	STX19
12517	ENSG00000178934	13.5086	4.23127	18.7818	1.86129	2.2733	0.023008	0.158826	0.0815741	0.130728	0	0.0490115	3.57933	0	0.183586	protein_coding	KNOWN	LGALS7B
23759	ENSG00000265246	4.34575	4.22641	18.7188	2.63563	1.60357	0.108809	0.392202	0.0855599	0	0	0	1.17602	0	0.0962781	lincRNA	NOVEL	RP11-663N22.1
18679	ENSG00000232498	2.53421	4.22167	18.6573	2.62914	1.60572	0.108336	0.391585	0.0663305	0	0	0	0	1.01213	0.14928	antisense	NOVEL	RP5-1011O1.2
15676	ENSG00000213171	2.4977	4.21994	18.635	2.19238	1.92482	0.0542517	0.26632	0	0.00622882	0	0	0.00821905	0.118616	0.00874738	protein_coding	KNOWN	LINGO4
14243	ENSG00000196431	12.6284	4.21431	18.5624	1.99337	2.11417	0.0345011	0.203262	0.0647765	0.129761	0	0	0.376688	2.41612	0	protein_coding	KNOWN	CRYBA4
10329	ENSG00000165949	817.543	4.20911	18.4956	1.26822	3.31892	0.000903651	0.0154008	1.12989	1.2258	0.0151919	0.175437	1.65774	9.44912	24.2502	protein_coding	KNOWN	IFI27
4730	ENSG00000121898	30.5873	4.20907	18.495	1.38912	3.03002	0.00244538	0.0330576	0.0432466	0.0303211	0	0.00649586	0.148606	0.948595	0.0304151	protein_coding	KNOWN	CPXM2
5052	ENSG00000124785	1031.26	4.20807	18.4822	1.31455	3.20114	0.00136883	0.0213368	0.0902642	1.72681	3.8615	0.0406745	12.2279	50.9898	16.0483	protein_coding	KNOWN	NRN1
22581	ENSG00000258412	2.51873	4.20289	18.416	1.96579	2.13802	0.0325152	0.196206	0.0571019	0	0	0	0.0603743	0.290436	0.642552	sense_intronic	NOVEL	RP11-404P21.5
21466	ENSG00000251002	35.5642	4.20088	18.3904	1.68738	2.48958	0.0127893	0.106516	0	0.12818	0	0.00961127	1.55605	0.284776	0.0990046	processed_transcript	NOVEL	AE000661.37
23900	ENSG00000266524	2.469	4.19892	18.3654	2.74237	1.53113	0.125738	0.419878	0	0.00856272	0	0	0	0.172119	0.012025	NA	NA	NA
11870	ENSG00000174358	5.53711	4.19857	18.361	2.05759	2.04053	0.0412974	0.226062	0.00497856	0.00797846	0	0	0	0.160375	0.0280112	protein_coding	KNOWN	SLC6A19
4916	ENSG00000123843	18.5327	4.19679	18.3383	1.67477	2.50589	0.0122143	0.103156	0	0.0719226	0	0	0.198434	0.200602	0.633569	protein_coding	KNOWN	C4BPB
23873	ENSG00000266283	4.35593	4.19327	18.2937	1.65324	2.53639	0.0112001	0.097027	0	0	0	0.0819829	0.252474	0.520522	0.230317	antisense	NOVEL	RP11-627G18.1
14957	ENSG00000201533	2.50736	4.19116	18.2669	2.00803	2.0872	0.0368701	0.211892	0.0872654	0	0	0	0.184533	0.147952	1.17837	misc_RNA	KNOWN	RN7SKP237
2392	ENSG00000102010	2.47554	4.19003	18.2526	1.96793	2.12916	0.0332413	0.199012	0.00936097	0	0	0	0.0197948	0.119031	0.0210673	protein_coding	KNOWN	BMX
7881	ENSG00000146216	32.7833	4.18578	18.1989	1.82484	2.29377	0.0218034	0.153266	0	0.0561033	0	0	0.514505	0.16916	0.0984852	protein_coding	KNOWN	TTBK1
13626	ENSG00000186115	35.1813	4.16894	17.9877	0.969421	4.30044	1.70456e-05	0.000616846	0.0919591	0.00669865	0.0200077	0.0301369	0.760155	1.01342	0.225772	protein_coding	KNOWN	CYP4F2
11844	ENSG00000174145	7.99057	4.16569	17.9472	1.87963	2.21623	0.0266756	0.174978	0.0126207	0	0	0	0.03336	0.13106	0.00710087	protein_coding	KNOWN	KIAA1239
15034	ENSG00000203697	335.2	4.16157	17.896	1.40876	2.95406	0.00313621	0.0399012	0.026957	0.833765	0.00645158	0.0453497	8.33393	1.47166	2.48132	protein_coding	KNOWN	CAPN8
17816	ENSG00000228613	19.3368	4.16113	17.8906	1.03618	4.01582	5.92391e-05	0.00173871	0.0668368	0.133888	0.0399899	0.080314	2.47335	1.69975	0.225629	antisense	NOVEL	AC144450.1
20470	ENSG00000242516	93.9347	4.16075	17.8859	1.49957	2.77463	0.00552647	0.0599183	0.0247723	0.0132331	0.0197624	0.337364	2.44458	2.80697	0.0185837	lincRNA	NOVEL	LINC00960
12046	ENSG00000175538	488.655	4.16001	17.8767	3.28933	1.2647	0.20598	0.532634	0	1.76872	0	0	17.3265	0.43601	5.96453	protein_coding	KNOWN	KCNE3
18491	ENSG00000231683	76.3022	4.1593	17.868	1.75951	2.3639	0.0180839	0.1355	0.0394595	0.0105394	0	0.20547	3.12906	0.273178	0.00740045	lincRNA	NOVEL	RP1-27K12.2
14351	ENSG00000196872	370.701	4.15718	17.8417	0.700462	5.93491	2.93999e-09	3.08311e-07	0.413124	0.0581537	0.35407	0.228088	6.03846	2.77802	5.24557	protein_coding	KNOWN	KIAA1211L
20179	ENSG00000240250	3.73424	4.15121	17.7681	1.95106	2.12767	0.0333644	0.199295	0	0.147699	0	0	1.55914	0.703162	0.10371	misc_RNA	KNOWN	RN7SL541P
5124	ENSG00000125538	13.6525	4.15096	17.7649	1.07405	3.86477	0.000111193	0.00292761	0.0169683	0.0203945	0.020305	0	0.439547	0.0719211	0.276862	protein_coding	KNOWN	IL1B
21550	ENSG00000251419	2.46131	4.15022	17.7558	2.21497	1.87371	0.0609698	0.284195	0	0	0	0.0209029	0.25749	0.0147462	0.0195744	pseudogene	KNOWN	RP11-524L6.4
11376	ENSG00000171236	419.379	4.14603	17.7044	1.12755	3.67703	0.000235965	0.00537707	1.24921	0.356049	0.0100326	0.181341	8.87327	10.2841	4.72654	protein_coding	KNOWN	LRG1
14504	ENSG00000197550	55.2891	4.14427	17.6827	0.915256	4.52799	5.95485e-06	0.000249577	0.0721838	0.0578395	0.0287928	0.0674638	0.432483	0.251564	2.32849	pseudogene	KNOWN	RP11-460N11.2
6804	ENSG00000138079	96.6766	4.14226	17.6581	0.839213	4.93588	7.97889e-07	4.3891e-05	0.0200786	0.0450482	0.0816917	0.0530802	0.407603	0.316589	1.91145	protein_coding	KNOWN	SLC3A1
22458	ENSG00000257671	12.0132	4.13969	17.6267	1.04195	3.97301	7.09686e-05	0.00201724	0.015515	0.0248638	0.0371318	0.0186435	0.83661	0.184132	0.24442	antisense	NOVEL	RP3-416H24.1
14063	ENSG00000188937	2.39953	4.13902	17.6185	2.63948	1.56812	0.116853	0.40611	0.00879079	0	0	0	0.0185891	0.126685	0	protein_coding	KNOWN	NYX
20102	ENSG00000239579	2.43752	4.13373	17.554	2.77223	1.49112	0.13593	0.436815	0	0	0	0.109977	0	0.0775846	1.44182	misc_RNA	KNOWN	RN7SL325P
14293	ENSG00000196616	2.3778	4.13261	17.5404	2.11631	1.95275	0.0508496	0.25658	0	0.00195297	0	0	0.0335008	0.00413228	0.00274264	protein_coding	KNOWN	ADH1B
22360	ENSG00000257045	4.18002	4.13078	17.5182	1.58144	2.61204	0.00900042	0.0837954	0	0	0.0378244	0.0379824	0.568143	0.214361	0.106705	antisense	NOVEL	RP11-486F17.1
10968	ENSG00000168961	184.005	4.12005	17.3883	1.00039	4.11846	3.81409e-05	0.0012144	0.289607	0.0884025	0.00550089	0.0552387	1.18593	2.03417	2.51915	protein_coding	KNOWN	LGALS9
22678	ENSG00000258791	36.8931	4.11576	17.3368	1.10729	3.71697	0.00020163	0.00471651	0.0533446	0.0854881	0.0383007	0.0256405	2.1207	0.479342	0.0720326	processed_transcript	NOVEL	LINC00520
5672	ENSG00000130701	444.97	4.11273	17.3003	1.4629	2.81135	0.00493348	0.0551887	1.48592	0.180856	0	0.519841	18.5744	0.892904	8.9106	protein_coding	KNOWN	RBBP8NL
21213	ENSG00000249650	3.84441	4.11181	17.2894	1.53954	2.6708	0.00756708	0.0746784	0.0444448	0.0356128	0	0	0.140976	0.376765	0.650162	antisense	NOVEL	RP11-310P5.1
16908	ENSG00000224758	2.34214	4.09911	17.1378	3.63098	1.12893	0.258929	0.594404	0.0434882	0	0	0	0	0.700445	0	lincRNA	NOVEL	RP13-137A17.5
21194	ENSG00000249534	2.30357	4.09782	17.1225	2.09026	1.96044	0.0499444	0.253744	0	0.010222	0	0	0.0134882	0.162216	0.0287104	lincRNA	NOVEL	RP11-83C7.2
23572	ENSG00000263264	2.37522	4.09754	17.1191	2.00709	2.04154	0.0411976	0.225767	0	0	0	0.0202589	0.196081	0.0571676	0.0189714	protein_coding	NOVEL	CTB-133G6.1
21817	ENSG00000253844	2.33802	4.09491	17.088	2.5206	1.62458	0.104252	0.383266	0.0390876	0	0	0	0	0.364486	0.263905	lincRNA	NOVEL	RP11-546K22.1
686	ENSG00000054983	180.578	4.0928	17.063	2.14305	1.9098	0.0561584	0.270998	0	0.366976	0	0	0.927774	2.5513	1.22993	protein_coding	KNOWN	GALC
14170	ENSG00000196167	109.135	4.08948	17.0238	1.14744	3.564	0.000365245	0.00771486	0.0962487	0.0554317	0.0215954	0	0.197169	1.07599	0.951062	protein_coding	KNOWN	COLCA1
8522	ENSG00000152931	28.4421	4.08729	16.9979	1.15515	3.53831	0.000402701	0.00833717	0.00269349	0.0302154	0	0.00647322	0.0854353	0.292263	0.142453	lincRNA	KNOWN	PART1
6947	ENSG00000139055	36.326	4.08648	16.9885	1.28542	3.17911	0.00147726	0.0226826	0.0974451	0.00867567	0.0129563	0.0910733	2.32389	0.119319	0.219305	protein_coding	KNOWN	ERP27
7877	ENSG00000146192	57.994	4.08503	16.9714	1.02743	3.97596	7.00972e-05	0.00199939	0.0465038	0.00828058	0	0.024836	0.360571	0.168638	0.4855	protein_coding	KNOWN	FGD2
9505	ENSG00000162458	1027.88	4.08284	16.9456	1.05445	3.87202	0.000107935	0.00285403	1.59294	1.16036	0.02666	0.267713	13.3208	10.5857	14.8602	protein_coding	KNOWN	FBLIM1
18319	ENSG00000230882	66.2958	4.07604	16.8659	1.22896	3.31665	0.000911032	0.0154945	0.00751556	0.11442	0.116915	0.0270931	2.93217	0.280326	0.160684	pseudogene	KNOWN	AC005077.14
7251	ENSG00000141431	2.27487	4.07504	16.8542	2.65562	1.5345	0.124908	0.419252	0	0.00167253	0	0	0	0.0283112	0.00469761	protein_coding	KNOWN	ASXL3
20711	ENSG00000244331	211.559	4.07179	16.8163	1.09605	3.71496	0.000203235	0.00473718	2.23183	1.8571	2.56798	3.09445	1.5429	16.1543	105.19	pseudogene	KNOWN	CTB-47B8.1
3476	ENSG00000110786	2.30833	4.07124	16.8099	3.64887	1.11575	0.264527	0.600498	0.0047784	0	0	0	0.0757836	0	0	protein_coding	KNOWN	PTPN5
6216	ENSG00000134716	720.713	4.07052	16.8015	1.2622	3.22495	0.00125996	0.0199169	0.799427	1.98505	0	0.612267	10.7095	13.859	18.2781	protein_coding	KNOWN	CYP2J2
22529	ENSG00000258084	4.62351	4.06819	16.7744	3.40497	1.19478	0.232172	0.564667	0	0.0592878	0	0	0	0.773588	0	lincRNA	NOVEL	RP11-754N21.1
22598	ENSG00000258471	11.7424	4.06254	16.7088	1.64212	2.47395	0.0133627	0.109724	0	0.0301104	0.0224836	0.0677326	1.3906	0.0159276	0.0845705	antisense	NOVEL	RP11-84C10.4
21502	ENSG00000251191	13.8759	4.06078	16.6885	1.44624	2.80781	0.00498797	0.0555915	0.0506594	0	0	0.0456558	0.267813	0.848156	0.0712569	lincRNA	KNOWN	LINC00589
3032	ENSG00000106560	71.3389	4.05228	16.5904	1.83697	2.20596	0.0273865	0.177615	0.0501037	0.431582	0	0	0.476776	0.127421	5.4407	protein_coding	KNOWN	GIMAP2
5539	ENSG00000129514	1211.82	4.04629	16.5218	0.542031	7.46507	8.32567e-14	2.0725e-11	1.11479	0.491559	1.79183	0.967036	23.6433	18.4028	11.9729	protein_coding	KNOWN	FOXA1
3505	ENSG00000111058	5.42688	4.04293	16.4833	1.37376	2.94296	0.00325094	0.040939	0.00367343	0.00147173	0	0	0.0252457	0.00934205	0.0330689	protein_coding	KNOWN	ACSS3
22489	ENSG00000257831	5.75829	4.03944	16.4434	1.57197	2.56967	0.0101796	0.0912902	0.0538808	0	0	0.0323727	0.712107	0.274053	0.0606305	antisense	NOVEL	RP11-596D21.1
2654	ENSG00000104313	17.3829	4.03535	16.3969	1.77628	2.2718	0.0230986	0.159318	0.0304838	0	0.0121594	0.00610511	0.0966923	0.499603	0	protein_coding	KNOWN	EYA1
257	ENSG00000011083	46.8888	4.03301	16.3703	1.0565	3.81734	0.000134897	0.00342721	0.0717838	0.038346	0	0.0431292	0.322565	0.233266	1.33954	protein_coding	KNOWN	SLC6A7
21140	ENSG00000249212	284.806	4.03221	16.3612	0.540471	7.46054	8.61685e-14	2.10251e-11	1.11957	0.713073	1.54584	1.13835	13.537	30.6138	11.0477	pseudogene	KNOWN	ATP1B1P1
20542	ENSG00000243135	3.40799	4.02875	16.3221	2.46377	1.6352	0.102007	0.379314	0	0.0178064	0	0	0.11748	0.141287	0	protein_coding	KNOWN	UGT1A3
5159	ENSG00000125798	359.228	4.02315	16.2588	1.73103	2.32414	0.0201179	0.145094	0.090819	1.90015	0.0120753	0	1.78177	5.32932	17.362	protein_coding	KNOWN	FOXA2
24155	ENSG00000267795	517.754	4.01511	16.1685	1.54489	2.59896	0.00935056	0.0862084	0.0894445	4.14493	0.0356777	0.0179134	21.9403	13.4207	16.7246	protein_coding	NOVEL	SMIM22
3665	ENSG00000112212	12.9302	4.01405	16.1566	1.37828	2.91236	0.00358707	0.0439812	0.0531718	0.0426056	0.0318139	0.0638935	1.96766	0.0225372	0.32908	protein_coding	KNOWN	TSPO2
13543	ENSG00000185666	6.76386	4.00787	16.0876	1.42928	2.80411	0.00504551	0.0560602	0	0.0115984	0.00577371	0	0.0561157	0.143155	0.0217174	protein_coding	KNOWN	SYN3
23236	ENSG00000261051	11.1111	4.00645	16.0717	1.64592	2.43416	0.0149263	0.118851	0.0626894	0	0	0.0150661	0.636308	0.0212571	0.282171	sense_overlapping	NOVEL	RP11-274H2.5
5490	ENSG00000129007	63.1769	3.99995	15.9994	0.591707	6.76001	1.37981e-11	2.28215e-09	0.0260688	0.0417768	0.043673	0.0751808	0.562279	0.530372	1.12644	protein_coding	KNOWN	CALML4
6200	ENSG00000134569	6745.91	3.99846	15.9829	0.784414	5.09738	3.44384e-07	2.07e-05	1.97376	3.44706	4.70183	1.46858	23.0913	15.372	100.485	protein_coding	KNOWN	LRP4
15251	ENSG00000204709	6.28196	3.99649	15.9611	3.41796	1.16926	0.242298	0.576203	0	0	0.202352	0	2.38388	0	0	protein_coding	KNOWN	C6orf100
9815	ENSG00000163734	89.5144	3.99522	15.9471	0.787791	5.07143	3.94844e-07	2.34471e-05	0.153884	0.199185	0.0708249	0.17069	0.500625	3.87336	2.77059	protein_coding	KNOWN	CXCL3
23925	ENSG00000266786	8.79624	3.99379	15.9313	1.27992	3.12034	0.00180642	0.0262639	0.137523	0.0275487	0	0	0.581616	0.378885	1.08325	pseudogene	KNOWN	RP1-66C13.3
5733	ENSG00000131002	586.943	3.99048	15.8948	1.05557	3.78039	0.000156582	0.00384726	0.101586	0.177598	0.295617	0.191428	4.04731	0.0802442	5.00374	pseudogene	KNOWN	TXLNG2P
17469	ENSG00000227188	9.38711	3.98843	15.8722	1.60146	2.49049	0.0127566	0.106318	0.0527447	0.211317	0	0	0.948046	0.0894248	2.31473	antisense	NOVEL	RP5-1104E15.6
22067	ENSG00000255120	11.2023	3.98673	15.8535	1.37965	2.88967	0.00385651	0.046248	0.153383	0	0	0.0921559	2.02717	0.390075	0.474644	antisense	NOVEL	RP11-770G2.4
21805	ENSG00000253772	16.8236	3.98665	15.8526	1.66179	2.39901	0.0164395	0.126882	0.112412	0.150122	0.0448389	0.0450263	4.04103	0	0.210823	pseudogene	KNOWN	RP11-34P1.1
22409	ENSG00000257345	4.64738	3.98612	15.8468	1.93863	2.05615	0.0397681	0.221479	0	0.0504728	0	0	0.2664	0.0177992	0.378032	lincRNA	NOVEL	RP11-511B23.1
10943	ENSG00000168875	16.0597	3.98318	15.8145	1.83418	2.17164	0.0298826	0.187123	0	0.112661	0	0	0.473005	0.0650125	0.848606	protein_coding	KNOWN	SOX14
3063	ENSG00000106772	244.889	3.98224	15.8043	1.33144	2.99092	0.00278139	0.0363631	0.102157	0.0588792	0.0150126	0.073223	2.6548	0.00911577	0.292428	protein_coding	KNOWN	PRUNE2
23472	ENSG00000262152	28.4382	3.98017	15.7815	0.916813	4.34131	1.41637e-05	0.000524099	0.00613139	0.0540427	0.0146742	0.0221032	0.149104	0.654905	0.372572	lincRNA	NOVEL	LINC00514
8417	ENSG00000151838	5.34989	3.97878	15.7664	1.68368	2.36315	0.0181204	0.135732	0.0242837	0	0	0	0.0342338	0.102928	0.154846	protein_coding	KNOWN	CCDC175
16097	ENSG00000214772	5.34861	3.97803	15.7582	1.39088	2.86007	0.00423546	0.0495155	0.03998	0.0320353	0.0478418	0	0.845424	0.101675	0.494872	antisense	NOVEL	RP11-174G6.1
5173	ENSG00000125845	77.7056	3.97672	15.7439	1.21015	3.28614	0.00101569	0.0167545	0	0.198724	0.0960158	0.0262955	0.678687	0.587433	2.55272	protein_coding	KNOWN	BMP2
15295	ENSG00000204982	3.52002	3.97617	15.7378	1.61213	2.4664	0.013648	0.111267	0	0.129921	0.194025	0	0.685733	2.61154	0.547359	pseudogene	KNOWN	PRSS3P4
22463	ENSG00000257683	3.65576	3.97555	15.7311	1.85424	2.14403	0.0320306	0.194281	0.105702	0	0	0	0.335278	0.851245	0.118943	lincRNA	NOVEL	RP11-110L15.2
16574	ENSG00000222259	7.2625	3.96979	15.6685	1.47603	2.6895	0.0071559	0.0718915	0.0941465	0.0754379	0.22532	0	3.88213	0.399046	0.317821	misc_RNA	KNOWN	RN7SKP114
2967	ENSG00000106069	567.195	3.96739	15.6424	0.974317	4.07197	4.66176e-05	0.00143606	0.253846	0.369283	0.0117966	0.165843	5.56329	1.3747	2.47097	protein_coding	KNOWN	CHN2
17462	ENSG00000227158	3.66994	3.96723	15.6406	1.42968	2.7749	0.00552191	0.0598952	0.0256512	0	0	0.0308236	0.189849	0.239194	0.202052	pseudogene	KNOWN	AC073621.2
7954	ENSG00000146955	147.787	3.96165	15.5803	0.848959	4.66648	3.06403e-06	0.000141404	1.13287	0.717757	0.315267	0.0633168	5.40401	8.44217	12.3625	protein_coding	KNOWN	RAB19
24121	ENSG00000267594	12.7012	3.95182	15.4745	1.29521	3.05111	0.00227996	0.0313545	0.083123	0	0	0.0399537	0.861289	0.295951	0.261901	pseudogene	KNOWN	CYP4F24P
8156	ENSG00000148935	21.0852	3.95126	15.4685	1.54492	2.55759	0.0105401	0.0935026	0.0297726	0	0.0623476	0	0.0314788	0.662514	0.360149	protein_coding	KNOWN	GAS2
7493	ENSG00000143369	381.124	3.94867	15.4408	0.691858	5.70735	1.14751e-08	1.03466e-06	0.257978	0.551235	0.140322	0.779691	10.4394	4.90399	4.68872	protein_coding	KNOWN	ECM1
12047	ENSG00000175544	5.42747	3.94754	15.4287	2.14793	1.83784	0.0660862	0.298667	0	0.00555921	0	0.0166737	0	0.229373	0.0234211	protein_coding	KNOWN	CABP4
18884	ENSG00000233365	4.27532	3.94715	15.4245	3.43312	1.14973	0.250256	0.585533	0	0.0407891	0	0	0	0.489064	0	lincRNA	NOVEL	RP4-655C5.4
14143	ENSG00000189431	158.67	3.94417	15.3926	2.15859	1.8272	0.0676697	0.302733	0	0.95669	0	0	1.22944	5.28946	4.55628	pseudogene	KNOWN	RASSF10
13070	ENSG00000183018	2115.82	3.93952	15.3431	0.686097	5.74193	9.36038e-09	8.64426e-07	1.48873	4.53607	0.734002	1.12864	29.6029	31.7346	29.5142	protein_coding	KNOWN	SPNS2
2518	ENSG00000103056	300.631	3.93399	15.2845	0.687618	5.72119	1.05778e-08	9.65475e-07	0.216264	0.246715	0.0526354	0.127734	3.97244	1.15591	2.27682	protein_coding	KNOWN	SMPD3
22453	ENSG00000257649	5.16407	3.9309	15.2517	2.4561	1.60047	0.109495	0.393524	0.158872	0	0	0	1.06385	0	0.774689	pseudogene	KNOWN	METTL7AP1
8914	ENSG00000157150	100.44	3.92461	15.1854	1.27912	3.06822	0.00215339	0.0301695	0.111435	0.765352	0	0.057388	1.71683	3.77861	5.24867	protein_coding	KNOWN	TIMP4
7038	ENSG00000139656	3.39386	3.92335	15.1721	1.62724	2.41104	0.0159073	0.124175	0.0318773	0.0255427	0	0	0.471857	0.18916	0.0717412	protein_coding	KNOWN	SMIM2
19529	ENSG00000236056	3.59216	3.90899	15.0219	1.81226	2.15697	0.031008	0.191374	0.0280329	0	0	0.0336856	0.56315	0.0475278	0.0630894	pseudogene	KNOWN	GAPDHP14
8509	ENSG00000152766	794.203	3.90669	14.9979	1.70418	2.29241	0.0218821	0.153619	4.68348	0	0.0181374	2.47699	43.7336	26.4169	10.5915	protein_coding	KNOWN	ANKRD22
20877	ENSG00000246790	9.63936	3.90585	14.9891	1.44643	2.70033	0.00692713	0.070484	0	0.0289507	0	0.021708	0.429762	0.114856	0.0406566	antisense	NOVEL	RP11-730K11.1
25976	ENSG00000280027	40.6251	3.90466	14.9768	1.00231	3.89566	9.79301e-05	0.00264626	0.113792	0.288734	0	0.0455789	1.28334	1.46302	2.43288	NA	NA	NA
6529	ENSG00000136514	11.3478	3.90296	14.9592	1.38072	2.82677	0.00470206	0.0533507	0.0507083	0.0406316	0	0.0203111	0.0714856	0.11463	1.10317	protein_coding	KNOWN	RTP4
25148	ENSG00000273585	7.21165	3.90133	14.9423	1.65598	2.35591	0.0184776	0.137322	0.107431	0	0.128557	0	2.21496	0.136606	0.241778	NA	NA	NA
12095	ENSG00000175874	87.3205	3.89707	14.8982	1.3394	2.90955	0.00361949	0.0442015	0.106537	0.0500422	0	0.0353157	1.58865	0.516963	0.0454729	protein_coding	KNOWN	CREG2
23921	ENSG00000266714	2422.04	3.8902	14.8274	1.23532	3.14915	0.00163744	0.0244861	0.339658	2.36698	0.0394133	0.257257	21.3254	1.95969	10.1273	protein_coding	KNOWN	MYO15B
8099	ENSG00000148357	38.2026	3.88384	14.7622	1.28857	3.01407	0.00257771	0.0343193	0.0403583	0.00340404	0	0.00510487	0.35709	0.0648232	0.121901	protein_coding	KNOWN	HMCN2
6728	ENSG00000137709	93.5372	3.88243	14.7478	1.23593	3.14131	0.00168194	0.0249697	0.126492	0.0633474	0.0141906	0.0189998	2.22763	0.174247	0.0756171	protein_coding	KNOWN	POU2F3
25207	ENSG00000274173	370.863	3.879	14.7128	1.56799	2.47387	0.0133659	0.109724	3.60481	0.0183979	0	1.54506	13.9832	18.4713	24.5709	NA	NA	NA
21618	ENSG00000251774	3.34263	3.87595	14.6817	1.47628	2.62549	0.00865253	0.0816984	0	0.206345	0	0.309445	2.72276	1.30981	1.73867	snRNA	KNOWN	RNU6-377P
19427	ENSG00000235590	12.078	3.86809	14.602	1.78155	2.17119	0.0299165	0.187217	0.0359131	0	0.00859505	0.00863096	0	0.127865	0.452615	antisense	KNOWN	GNAS-AS1
15392	ENSG00000205667	5.176	3.86574	14.5782	1.79851	2.14941	0.0316021	0.19282	0.028018	0	0.0167638	0	0.429543	0.0237512	0.0315279	protein_coding	KNOWN	ARSH
11133	ENSG00000169908	2830.69	3.86158	14.5362	1.90013	2.03227	0.0421259	0.228732	0.0143222	12.3885	0.0257078	0.00860507	59.6102	31.8643	44.1427	protein_coding	KNOWN	TM4SF1
20716	ENSG00000244357	34.6188	3.86154	14.5358	1.03538	3.7296	0.000191783	0.00454452	0.357372	0.572712	0.748383	0.214717	15.1141	0.757374	4.8257	misc_RNA	KNOWN	RN7SL145P
20761	ENSG00000244649	287.041	3.85942	14.5144	1.27017	3.0385	0.00237759	0.0324617	0.401697	0.332783	0.122209	0.343614	7.84647	0.0173148	5.2097	lincRNA	NOVEL	CTD-2377D24.6
10524	ENSG00000166863	3.41979	3.85851	14.5053	2.05056	1.88169	0.0598783	0.281826	0.033376	0	0	0	0.317598	0.0282932	0.037557	protein_coding	KNOWN	TAC3
16066	ENSG00000214546	13.785	3.85823	14.5025	0.814381	4.73763	2.16235e-06	0.000103273	0.0852821	0.0341675	0.153078	0.102479	1.62305	0.903684	1.3915	lincRNA	NOVEL	AC087491.2
12799	ENSG00000180999	8.37361	3.85711	14.4913	1.20165	3.20985	0.00132806	0.0208065	0	0.0244025	0	0.0548929	0.160998	0.29689	0.394098	protein_coding	KNOWN	C1orf105
18851	ENSG00000233217	3.26409	3.8549	14.4691	1.61408	2.3883	0.0169265	0.129393	0.00858114	0.00687591	0	0	0.0272187	0.0363717	0.12553	pseudogene	KNOWN	MROH3P
19445	ENSG00000235670	3.41049	3.85345	14.4545	2.15464	1.78844	0.0737048	0.31787	0.108766	0	0	0	1.09249	0.092202	0.0611954	pseudogene	KNOWN	RPL21P40
11225	ENSG00000170423	5.41938	3.84911	14.4112	2.57758	1.49331	0.135357	0.435784	0	0.0258247	0	0	0.27261	0.0204909	0	protein_coding	KNOWN	KRT78
17900	ENSG00000228991	14.6874	3.8475	14.395	1.122	3.42916	0.000605458	0.0113381	0.0542704	0.0434859	0	0.0652136	0.382537	0.153353	1.24174	pseudogene	KNOWN	RP11-318K12.1
2354	ENSG00000101670	1071.61	3.84493	14.3694	1.55249	2.47663	0.013263	0.109242	0.865413	0.460688	0.0023972	0.00240722	2.17738	5.44443	6.7266	protein_coding	KNOWN	LIPG
22361	ENSG00000257046	10.6901	3.8344	14.2649	1.75799	2.18112	0.0291745	0.184338	0.0139199	0	0.0249858	0.00836338	0.419453	0.0767006	0	protein_coding	NOVEL	LST3
23559	ENSG00000263096	3.36339	3.83289	14.25	2.49468	1.53643	0.124434	0.418371	0.0301918	0	0	0	0	0.204752	0.135896	antisense	NOVEL	RP11-515O17.2
1531	ENSG00000085563	1996.32	3.82877	14.2094	0.949728	4.03144	5.54358e-05	0.00165195	0.913866	3.11756	0.102861	1.52218	23.6728	10.4277	26.2076	protein_coding	KNOWN	ABCB1
16761	ENSG00000224093	102.161	3.82646	14.1867	0.925419	4.13485	3.5519e-05	0.00114422	0.0403279	0.398539	0.032172	0.387677	3.63852	2.68934	2.8438	antisense	NOVEL	RP5-1033H22.2
22426	ENSG00000257493	11.9076	3.82412	14.1636	1.22241	3.12834	0.00175797	0.0258493	0.255639	0	0.229431	0	1.6893	0.866833	2.51705	pseudogene	KNOWN	RP11-536C10.20
6701	ENSG00000137501	2738.27	3.82065	14.1296	1.16814	3.27071	0.0010728	0.0174623	2.06719	0.854375	0.00837593	1.09342	20.559	11.3925	10.6882	protein_coding	KNOWN	SYTL2
9691	ENSG00000163295	14.3818	3.81886	14.1121	2.00845	1.90139	0.0572507	0.274065	0	0.0879631	0	0	0.833587	0.0930603	0.03369	protein_coding	KNOWN	ALPI
4984	ENSG00000124343	4.26488	3.818	14.1037	2.77866	1.37405	0.169428	0.485509	0.00946895	0.0151746	0	0	0.270313	0	0	protein_coding	KNOWN	XG
20175	ENSG00000240210	6.73342	3.81515	14.0759	1.95773	1.94876	0.0513236	0.257752	0	0.131381	0	0	0.208031	0.0555975	1.21772	pseudogene	KNOWN	RP11-204K16.1
23	ENSG00000002726	2667.89	3.81224	14.0475	1.83408	2.07855	0.0376584	0.214965	0.157986	11.4262	0.00821969	0.00825403	56.7064	21.3584	44.1815	protein_coding	KNOWN	AOC1
21684	ENSG00000253227	5.42156	3.80999	14.0256	2.02002	1.88612	0.0592791	0.280398	0	0	0.170518	0	0.100442	1.44956	0.160347	lincRNA	NOVEL	RP11-383J24.1
17774	ENSG00000228445	4.00682	3.80764	14.0028	2.58098	1.47527	0.14014	0.443278	0	0.0729117	0	0	0.737598	0.0771367	0	pseudogene	KNOWN	UGT1A2P
17808	ENSG00000228598	6.05746	3.79918	13.9209	1.25599	3.02486	0.00248748	0.0334764	0.0822124	0.0658753	0	0	0.478081	0.313617	0.878858	antisense	NOVEL	MACC1-AS1
3489	ENSG00000110900	102.898	3.79778	13.9073	1.47104	2.5817	0.0098316	0.0891427	0.0406208	0.156826	0	0.0443743	0.300641	2.1913	0.041554	protein_coding	KNOWN	TSPAN11
11973	ENSG00000175065	48.7901	3.79418	13.8728	0.642009	5.90986	3.42397e-09	3.53056e-07	0.0727149	0.0224097	0.0334669	0.0470494	0.35484	0.568998	0.893771	protein_coding	KNOWN	DSG4
7619	ENSG00000144045	79.8132	3.79404	13.8714	1.00892	3.76049	0.000169581	0.00412553	0.0714745	0.221926	0.0855295	0.075151	0.122802	3.20369	1.4276	protein_coding	KNOWN	DQX1
8075	ENSG00000148204	271.587	3.78546	13.7891	1.08964	3.47403	0.000512702	0.0100199	0.0124115	0.530406	0.113866	0.0646282	4.38301	1.70096	1.40129	protein_coding	KNOWN	CRB2
11607	ENSG00000172572	170.2	3.78345	13.7699	1.50107	2.5205	0.0117188	0.100173	0.121982	0	0.00748561	0.214231	0.873048	0.204161	2.46722	protein_coding	KNOWN	PDE3A
19215	ENSG00000234771	651.375	3.77881	13.7257	0.704487	5.36392	8.1436e-08	5.90267e-06	0.209609	0.892471	0.260664	0.365466	6.02723	2.58519	9.21269	antisense	NOVEL	RP11-395P17.3
7961	ENSG00000147041	199.414	3.77865	13.7242	1.4527	2.60112	0.00929198	0.0858611	0.235749	0.0175723	0	0.454576	5.28663	0.590249	1.40044	protein_coding	KNOWN	SYTL5
23432	ENSG00000261804	80.9297	3.77417	13.6816	0.973621	3.87642	0.000106003	0.00281501	0.474989	0.53284	0	0.228307	2.83748	3.68429	6.28028	lincRNA	NOVEL	RP11-44F14.2
21441	ENSG00000250874	5.07118	3.77251	13.6659	3.43762	1.09742	0.272458	0.609077	0	0.0579413	0	0	0.611638	0	0	lincRNA	NOVEL	CTC-480C2.1
23102	ENSG00000260459	16.6824	3.7678	13.6213	0.883563	4.26432	2.00514e-05	0.000709979	0.162811	0.217429	0.0649423	0.130427	0.745947	1.93224	3.35879	pseudogene	KNOWN	FTLP14
22620	ENSG00000258562	6.16476	3.76676	13.6116	2.00586	1.87788	0.0603979	0.282974	0	0.0800273	0.0597568	0.0600065	2.00635	0.0423323	0	pseudogene	KNOWN	CTD-2313J17.3
13234	ENSG00000183914	178.305	3.76623	13.6066	0.904132	4.16558	3.10564e-05	0.00102457	0.015244	0.102604	0.0127691	0.0457945	0.710785	0.916206	0.181828	protein_coding	KNOWN	DNAH2
20416	ENSG00000242111	6.14234	3.7575	13.5244	2.43135	1.54544	0.122241	0.414888	0.0276931	0	0	0	0.12444	0.158462	0	pseudogene	KNOWN	RP11-86L19.2
9700	ENSG00000163347	948.157	3.75385	13.4903	1.88507	1.99136	0.046441	0.241965	0.0143417	4.35538	0	0.094785	3.93496	7.78091	33.479	protein_coding	KNOWN	CLDN1
18394	ENSG00000231226	19.4473	3.75229	13.4757	0.75014	5.00212	5.67038e-07	3.25887e-05	0.0956899	0.268361	0.0572533	0.172478	2.88345	1.70347	1.61516	antisense	NOVEL	TRIM31-AS1
21075	ENSG00000248791	8.49714	3.751	13.4637	1.4516	2.58404	0.00976505	0.0887025	0.020299	0	0.0971626	0	0.536557	0.103246	0.502521	pseudogene	KNOWN	CTD-2165H16.3
8987	ENSG00000157873	460.674	3.74763	13.4323	1.56626	2.39273	0.0167235	0.128351	0.0084473	0.839315	0.434661	0	1.59872	6.3159	5.01416	protein_coding	KNOWN	TNFRSF14
3246	ENSG00000108576	48.1661	3.74395	13.398	1.13191	3.30765	0.000940812	0.0158414	0.0564232	0.0180844	0.0180049	0.0271202	0.0477253	0.089284	1.06666	protein_coding	KNOWN	SLC6A4
4179	ENSG00000116574	2010.93	3.74351	13.394	1.22072	3.06663	0.00216484	0.0302783	3.05806	1.37201	0.0215682	3.53753	8.67086	54.6534	16.9286	protein_coding	KNOWN	RHOU
9163	ENSG00000159409	10.482	3.74125	13.373	1.24655	3.00129	0.00268837	0.035448	0.0118346	0.0142243	0	0.014221	0.106359	0.0200647	0.286318	protein_coding	KNOWN	CELF3
2031	ENSG00000100170	809.763	3.73988	13.3603	1.16642	3.2063	0.00134454	0.0210514	1.24656	0.154584	0.0118388	1.24233	6.99273	8.04707	11.5613	protein_coding	KNOWN	SLC5A1
21494	ENSG00000251163	10.8099	3.73845	13.3471	1.80993	2.06553	0.0388732	0.218857	0	0.110581	0.0550474	0.165832	0	3.0417	0.258821	pseudogene	KNOWN	CTD-2325A15.2
11715	ENSG00000173239	47.6582	3.72721	13.2435	1.53555	2.42728	0.0152124	0.12039	0.469362	0	0	0.0835563	2.97756	1.56206	0.958512	protein_coding	KNOWN	LIPM
8514	ENSG00000152784	135.81	3.72425	13.2163	1.54617	2.40869	0.0160101	0.124673	0.137403	0.0275246	0.321994	0.0343978	0.254235	4.89695	0.00644232	protein_coding	KNOWN	PRDM8
4445	ENSG00000119227	191.555	3.71574	13.1386	0.903596	4.11217	3.9195e-05	0.00124155	0.237228	0.393283	0.195778	0.226085	8.38095	0.575566	1.43599	protein_coding	KNOWN	PIGZ
1953	ENSG00000099834	248.414	3.7155	13.1364	0.68293	5.44052	5.31242e-08	4.01593e-06	0.29841	0.353232	0.0649256	0.41563	2.05082	3.95547	5.16663	protein_coding	KNOWN	CDHR5
21377	ENSG00000250522	7.67547	3.71505	13.1324	1.55339	2.39158	0.0167762	0.128555	0	0.220775	0	0	0.825397	0.856415	0.671759	antisense	NOVEL	AC004066.3
11536	ENSG00000172159	512.933	3.71322	13.1157	1.4592	2.54469	0.0109374	0.0957771	1.09344	0.116821	0.0581537	0.131393	0.94201	12.7572	0.0729137	protein_coding	KNOWN	FRMD3
10573	ENSG00000167094	20.9607	3.71322	13.1157	0.923954	4.01884	5.84864e-05	0.00171997	0.0164941	0.0165205	0.0148032	0.00991002	0.122075	0.0524336	0.399048	protein_coding	KNOWN	TTC16
14102	ENSG00000189157	62.9787	3.71085	13.0941	0.707861	5.24233	1.58559e-07	1.05324e-05	0.0303887	0.0243499	0.00991757	0.0531147	0.651367	0.252925	0.248695	protein_coding	KNOWN	FAM47E
15991	ENSG00000214189	35.5949	3.70917	13.0789	1.7704	2.09511	0.0361616	0.2089	0	0.0424681	0.0422815	0	0.00373583	0.476247	0.353862	protein_coding	KNOWN	ZNF788
8431	ENSG00000152049	5.17209	3.70466	13.0381	2.57815	1.43694	0.150734	0.459621	0	0	0	0.0229608	0	0.188976	0.0286687	protein_coding	KNOWN	KCNE4
18406	ENSG00000231298	6.53585	3.70385	13.0308	1.61515	2.29319	0.0218373	0.153452	0.0136807	0	0	0.0493178	0.130182	0.4291	0.0307889	lincRNA	NOVEL	LINC00704
24249	ENSG00000268628	8.66062	3.70151	13.0097	1.37971	2.68281	0.00730055	0.072899	0.0159386	0.038314	0	0.0383051	0.0337041	0.702593	0.179353	protein_coding	KNOWN	AL121761.2
10173	ENSG00000165140	91.8921	3.70129	13.0076	1.25253	2.95504	0.0031263	0.0397957	0.0787376	0.782329	0	0.113537	1.7982	2.87012	4.92623	protein_coding	KNOWN	FBP1
7913	ENSG00000146521	4.92323	3.69833	12.981	2.50786	1.4747	0.140294	0.443599	0	0.0392305	0	0	0	0.33203	0.0688662	protein_coding	KNOWN	C6orf123
23124	ENSG00000260573	10.8384	3.69768	12.9752	2.4562	1.50545	0.132208	0.431142	0	0.198143	0	0	0	1.32762	0.649273	lincRNA	NOVEL	RP11-21B23.3
20302	ENSG00000241172	5.80211	3.69574	12.9577	1.29938	2.84424	0.00445182	0.0511949	0.0878491	0.140784	0.105124	0	0.743068	0.372354	2.27364	misc_RNA	KNOWN	RN7SL70P
19631	ENSG00000236562	7.86554	3.69361	12.9386	2.16729	1.70425	0.0883335	0.350151	0.204677	0	0.163284	0	0	0.173507	3.37799	pseudogene	KNOWN	RP11-396M11.1
7146	ENSG00000140526	19860.3	3.69323	12.9352	0.600901	6.14615	7.93871e-10	9.63751e-08	8.34091	14.5204	5.30502	6.24861	45.708	155.134	133.053	protein_coding	KNOWN	ABHD2
6296	ENSG00000135218	45.0625	3.69234	12.9272	1.42645	2.58849	0.0096399	0.0880525	0.0129841	0.00832315	0.052827	0.00624091	0.00274564	0.686825	0.0847419	protein_coding	KNOWN	CD36
14310	ENSG00000196674	2.92882	3.68532	12.8644	1.55846	2.36471	0.018044	0.135393	0.0754795	0.0604804	0	0	0.798051	0.25594	0.424675	pseudogene	KNOWN	Z98881.1
1992	ENSG00000100031	163.589	3.68411	12.8537	0.798586	4.61329	3.96338e-06	0.000176945	0.154023	0.0664548	0.241022	0.206436	2.65571	3.33449	0.419963	protein_coding	KNOWN	GGT1
12410	ENSG00000178078	1616.16	3.68408	12.8534	1.35526	2.71835	0.00656087	0.0676794	0.28489	9.80071	0.125001	0.319514	35.6841	21.7596	44.1224	protein_coding	KNOWN	STAP2
18250	ENSG00000230601	4.38848	3.68199	12.8348	1.75665	2.09602	0.0360801	0.208674	0.0371001	0.0297276	0.0443956	0	0	0.660455	0.417477	lincRNA	NOVEL	RP11-402G3.3
10662	ENSG00000167555	14.0895	3.67989	12.8161	1.53503	2.39728	0.0165175	0.127245	0	0.0148046	0.0147395	0	0.0195349	0.0287145	0.239093	protein_coding	KNOWN	ZNF528
25160	ENSG00000273691	14.4092	3.66973	12.7262	0.898418	4.08466	4.41412e-05	0.00136832	0.0250399	0.10032	0.0898916	0.030089	0.979571	0.339627	1.07072	NA	NA	NA
1770	ENSG00000091138	34.3106	3.66861	12.7164	1.03673	3.53865	0.000402177	0.00833717	0.0621334	0.0560096	0.0371757	0.0279983	0.180659	0.105343	1.477	protein_coding	KNOWN	SLC26A3
20693	ENSG00000244227	8.75041	3.66722	12.7041	1.69603	2.16223	0.0306002	0.189857	0.00487597	0.0234422	0	0	0.0670203	0.210805	0.0054868	lincRNA	NOVEL	RP11-298O21.5
3783	ENSG00000113248	15.2889	3.66604	12.6937	1.11256	3.29513	0.000983779	0.0163481	0	0.0157186	0.0469486	0.00785746	0.394079	0.155208	0.110371	protein_coding	KNOWN	PCDHB15
19664	ENSG00000236703	6.12116	3.66493	12.6839	1.26036	2.90785	0.00363922	0.0443327	0	0.0468757	0.140009	0.0702971	1.48448	0.347144	0.526635	antisense	NOVEL	MYB-AS1
20732	ENSG00000244474	7.24814	3.6614	12.6529	1.94854	1.87904	0.0602385	0.282711	0	0.0500726	0	0	0.198215	0.291358	0.0117198	protein_coding	KNOWN	UGT1A4
13311	ENSG00000184434	73.3015	3.65747	12.6185	0.764229	4.78583	1.7028e-06	8.39276e-05	0.0727816	0.040823	0.095803	0.166169	0.777221	0.499753	2.24404	protein_coding	KNOWN	LRRC19
13528	ENSG00000185615	17.0235	3.65627	12.608	1.03651	3.52747	0.000419544	0.00858741	0.0116846	0.0561757	0.0419467	0.0280813	0.605354	0.643835	0.0657415	protein_coding	KNOWN	PDIA2
25705	ENSG00000278949	9.65375	3.6556	12.6021	1.68524	2.16918	0.0300687	0.187979	0	0.0800273	0	0	0.343192	0.105831	0.351205	NA	NA	NA
4390	ENSG00000118508	503.93	3.65326	12.5817	3.21801	1.13525	0.25627	0.592108	0	7.60949	0	0	33.9336	29.3475	8.54905	protein_coding	KNOWN	RAB32
13291	ENSG00000184304	38.7227	3.65243	12.5745	1.92764	1.89476	0.0581236	0.276717	0.010128	0.125788	0	0	0.910212	0.00429281	0.38179	protein_coding	KNOWN	PRKD1
3512	ENSG00000111181	32.1214	3.65142	12.5657	1.13274	3.22353	0.00126621	0.0200028	0.0198991	0.0438483	0.0357183	0.0119558	0.284034	0.754878	0.016794	protein_coding	KNOWN	SLC6A12
1622	ENSG00000088002	421.019	3.6464	12.522	1.01158	3.60466	0.000312564	0.00678663	0.577089	0.246122	0.256179	1.67771	18.1769	1.24669	6.44146	protein_coding	KNOWN	SULT2B1
16450	ENSG00000219700	2.69818	3.64472	12.5075	2.04461	1.7826	0.0746522	0.319675	0	0.0464617	0	0	0.33719	0.024577	0.16312	pseudogene	KNOWN	PTCHD3P3
13144	ENSG00000183484	6.59275	3.64424	12.5033	1.38353	2.63401	0.00843819	0.0804763	0	0.0200449	0	0.0075151	0.0793491	0.159048	0.0351874	protein_coding	KNOWN	GPR132
17046	ENSG00000225329	11.2508	3.64415	12.5025	1.56392	2.33014	0.0197989	0.143578	0.0221195	0.0620338	0	0	0.678226	0.0468774	0.0995617	lincRNA	NOVEL	RP11-325F22.5
17400	ENSG00000226860	51.5075	3.64175	12.4818	0.489704	7.43665	1.03273e-13	2.47092e-11	0.886306	0.516495	0.77134	0.774562	12.0971	7.64994	7.61601	pseudogene	KNOWN	AC109638.1
17608	ENSG00000227802	3.69791	3.64079	12.4734	2.04116	1.78369	0.0744744	0.319524	0	0.0498748	0	0	0.416802	0.0703532	0.0233471	pseudogene	KNOWN	DNAJB3
15703	ENSG00000213238	2.97201	3.6394	12.4615	2.77044	1.31365	0.188963	0.510558	0.132327	0	0	0	0.0699551	1.23393	0	pseudogene	KNOWN	AC008155.2
9507	ENSG00000162482	341.686	3.63512	12.4245	1.2223	2.97401	0.00293939	0.0379655	0.122886	0.123083	3.30864	0.166123	11.1738	7.12277	16.3171	protein_coding	KNOWN	AKR7A3
19865	ENSG00000237686	345.469	3.62554	12.3423	1.25036	2.89959	0.00373645	0.0452932	1.14403	0.980857	0.0136899	0.673609	19.0752	6.20677	0.772405	antisense	NOVEL	RP5-1120P11.1
24645	ENSG00000271225	18.2636	3.62348	12.3247	1.30132	2.78447	0.00536154	0.0585422	0	0.111755	0.445056	0.0558644	0.983086	0.472923	4.1328	pseudogene	KNOWN	RP11-460N11.3
17189	ENSG00000225946	44.2977	3.62243	12.3157	1.04192	3.47669	0.000507648	0.00994517	0.133805	0.00824732	0.0246333	0.160785	0.489713	0.56714	1.94578	processed_transcript	NOVEL	RP11-395B7.2
10403	ENSG00000166278	57.3156	3.62228	12.3144	0.971127	3.72997	0.000191501	0.00454221	0.0616816	0.0684337	0.0170333	0.0456119	0.145483	0.201109	1.4469	protein_coding	KNOWN	C2
1059	ENSG00000070985	17.9069	3.62097	12.3033	0.747193	4.8461	1.25912e-06	6.56022e-05	0.0132594	0.0371858	0.0158668	0.0159331	0.168231	0.258524	0.35809	protein_coding	KNOWN	TRPM5
24906	ENSG00000272549	10.0443	3.61707	12.2701	1.28827	2.80769	0.00498979	0.0555915	0	0.0322456	0	0.00690816	0.170195	0.121836	0.0905676	lincRNA	NOVEL	RP11-351J23.2
18366	ENSG00000231108	2.79983	3.6156	12.2575	1.84126	1.96366	0.0495698	0.252501	0.0548369	0.0439398	0	0	0.173938	0.046486	0.802184	pseudogene	KNOWN	RP11-390F4.9
10715	ENSG00000167748	238.486	3.61407	12.2445	1.58531	2.27973	0.0226237	0.156877	0.0441831	1.76131	0	0.0796385	2.04379	10.7869	4.52434	protein_coding	KNOWN	KLK1
4391	ENSG00000118513	2600.87	3.61271	12.233	0.724969	4.98326	6.25224e-07	3.56667e-05	2.23314	0.574745	4.75515	1.36758	34.4359	20.5237	26.9476	protein_coding	KNOWN	MYB
21314	ENSG00000250230	8.19985	3.61064	12.2155	1.82069	1.98311	0.047355	0.244599	0	0.0627204	0	0	0.449273	0.0947926	0.0629148	lincRNA	NOVEL	RP11-855O10.2
16794	ENSG00000224272	17.3031	3.60851	12.1974	1.25129	2.88383	0.00392872	0.0469541	0.0246406	0.108592	0	0.0148046	0.950923	0.125329	0.332729	antisense	NOVEL	AC114730.3
17337	ENSG00000226580	13.5137	3.60235	12.1455	1.43625	2.50817	0.012136	0.102706	0.53973	1.15327	0	0	7.60881	0.762561	7.69302	pseudogene	KNOWN	RPL39P40
898	ENSG00000066294	8.123	3.60094	12.1336	1.87212	1.92345	0.0544231	0.266535	0	0.015919	0	0	0.00600155	0.0793953	0.067067	protein_coding	KNOWN	CD84
10357	ENSG00000166126	92.3446	3.60082	12.1327	1.02429	3.51543	0.000439044	0.00890518	0.0508829	0.235569	0.0202962	0.0679367	2.22369	1.01126	0.203581	protein_coding	KNOWN	AMN
4725	ENSG00000121858	351.757	3.59964	12.1227	1.65646	2.17309	0.0297739	0.186947	0.0680685	1.83625	0	0.0181764	5.28575	3.7122	8.51062	protein_coding	KNOWN	TNFSF10
19574	ENSG00000236301	2.5694	3.59832	12.1116	2.79388	1.28793	0.19777	0.522194	0	0.0209216	0	0	0.0138033	0.210273	0	antisense	KNOWN	MRGPRG-AS1
14890	ENSG00000198976	10.3962	3.5968	12.0989	1.70277	2.11233	0.0346581	0.203849	0	2.28222	0	0	3.01144	9.12133	9.61505	miRNA	KNOWN	MIR429
23996	ENSG00000267130	7.69361	3.5955	12.088	1.37617	2.61269	0.00898316	0.0836979	0.065017	0	0	0.312509	1.71858	0.606274	0.951104	lincRNA	NOVEL	CTD-2540B15.9
15873	ENSG00000213785	2.93967	3.59101	12.0504	2.08842	1.71949	0.0855256	0.34417	0.0446716	0	0	0.0536793	0.330621	0.530162	0	pseudogene	KNOWN	RP11-449L13.2
17098	ENSG00000225556	26.8115	3.58797	12.025	1.81876	1.97276	0.0485232	0.248872	0	0.287497	0	0	0.980008	0.684352	0.975713	protein_coding	KNOWN	C2CD4D
13200	ENSG00000183742	3718.64	3.58786	12.0242	1.45467	2.46645	0.013646	0.111267	3.86121	0.418902	0.0031756	2.91144	7.0679	11.0682	46.7459	protein_coding	KNOWN	MACC1
12239	ENSG00000176920	958.035	3.58316	11.985	0.894263	4.00682	6.15405e-05	0.00179056	2.80543	0.491931	0.204588	1.94236	11.2486	12.194	25.4911	protein_coding	KNOWN	FUT2
20576	ENSG00000243415	7.11889	3.58298	11.9835	2.17622	1.64642	0.0996772	0.37503	0.130195	0	0	0.039112	1.37656	0	0.146505	antisense	NOVEL	RP11-274H2.2
16443	ENSG00000219607	65.9226	3.57747	11.9378	1.08891	3.28538	0.00101846	0.0167885	0.0374706	0.0986519	0.0192167	0.102917	1.76017	0.0589909	0.499952	protein_coding	KNOWN	PPP1R3G
25669	ENSG00000278716	10.1804	3.57476	11.9155	1.38498	2.58109	0.00984894	0.0892409	0	0.0413095	0.123384	0.0309749	0.981156	0.0437032	0.69615	NA	NA	NA
8643	ENSG00000154162	2.53041	3.57397	11.9089	3.64232	0.981235	0.326477	0.660506	0	0.00710093	0	0	0	0	0.0747909	protein_coding	KNOWN	CDH12
22296	ENSG00000256612	16.8701	3.57151	11.8886	0.945172	3.77868	0.00015766	0.00386221	0.0258532	0.0362525	0	0.0155332	0.396355	0.126018	0.19637	pseudogene	KNOWN	CYP2B7P1
5528	ENSG00000129451	2498.3	3.56794	11.8593	1.63021	2.18864	0.0286227	0.18209	1.86793	2.64387	0	8.06083	91.8795	15.9156	4.02741	protein_coding	KNOWN	KLK10
24823	ENSG00000272189	77.8891	3.55895	11.7855	0.910783	3.90757	9.32302e-05	0.00254437	0.124816	0.388939	0.0165956	0.266639	1.37834	4.09126	1.623	antisense	NOVEL	RP3-325F22.5
22327	ENSG00000256802	8.84259	3.55836	11.7807	2.59814	1.36958	0.170818	0.487179	0	0.0615414	0	0	0.0507532	0	0.507747	antisense	NOVEL	RP11-680F8.1
2987	ENSG00000106258	419.308	3.55425	11.7472	0.771159	4.60897	4.0467e-06	0.000180236	0.175607	0.744202	0.135423	0.159435	5.43396	2.01794	3.28464	protein_coding	KNOWN	CYP3A5
21000	ENSG00000248409	5.88218	3.55338	11.7401	1.99544	1.78075	0.0749529	0.320154	0.0417597	0.133845	0	0	0.485682	1.13281	0	pseudogene	KNOWN	KB-1269D1.8
22523	ENSG00000258053	2.70129	3.55196	11.7286	2.34593	1.5141	0.130002	0.427396	0	0.0372516	0	0.0558644	0	0.0394102	0.784709	protein_coding	NOVEL	CTD-2021H9.3
13417	ENSG00000185028	3.80652	3.54549	11.6761	2.18235	1.62462	0.104245	0.383266	0	0.0267605	0.0199823	0	0.0353111	0.382202	0	protein_coding	KNOWN	LRRC14B
13420	ENSG00000185038	21.8094	3.54474	11.6701	1.32418	2.67694	0.00742976	0.0737707	0.0229205	0.0293852	0.0109711	0.0110169	0.0678552	0.5829	0.00515836	protein_coding	KNOWN	MROH2A
25657	ENSG00000278611	2.67955	3.54458	11.6688	1.63149	2.1726	0.0298102	0.187002	0	0.024332	0	0.0364895	0.0963197	0.334645	0.102511	NA	NA	NA
8512	ENSG00000152779	3.8072	3.54394	11.6636	2.18258	1.62374	0.104432	0.383493	0	0.00870617	0	0.00652811	0.011488	0.124344	0	protein_coding	KNOWN	SLC16A12
16824	ENSG00000224397	28.6032	3.54183	11.6466	1.03501	3.42201	0.000621598	0.0115963	0.0750176	0.0515231	0	0.103022	0.600541	0.19078	1.21799	lincRNA	NOVEL	RP11-290F20.3
15384	ENSG00000205634	2.796	3.54156	11.6444	2.54255	1.39291	0.163646	0.477547	0.0121775	0	0	0	0.0450638	0.0670997	0	lincRNA	NOVEL	LINC00898
20454	ENSG00000242360	3.88388	3.53738	11.6107	1.67245	2.11509	0.0344226	0.203091	0.183044	0.0733351	0	0	0.0967672	0.698262	1.54481	misc_RNA	KNOWN	RN7SL272P
23828	ENSG00000265871	5.37026	3.53566	11.5969	1.30363	2.71217	0.00668441	0.0686091	0	0.483843	0	0.725596	2.55376	2.30346	5.77558	miRNA	KNOWN	MIR3174
19495	ENSG00000235899	7.73208	3.53425	11.5855	1.81532	1.9469	0.0515465	0.258561	0	0	0	0.278829	1.57016	0.354065	0.417772	antisense	NOVEL	RP11-345L23.1
4066	ENSG00000115616	2278.98	3.53192	11.5668	0.492898	7.16561	7.74393e-13	1.60371e-10	1.52316	1.98724	2.20088	1.84085	36.8269	17.0089	11.6767	protein_coding	KNOWN	SLC9A2
15423	ENSG00000205869	7.5087	3.52979	11.5498	1.32326	2.6675	0.00764176	0.0751491	0	0	0.100102	0.0670136	0.206375	0.590944	0.564791	protein_coding	KNOWN	KRTAP5-1
6050	ENSG00000133328	5.51156	3.52674	11.5253	1.64416	2.14501	0.0319519	0.19409	0.1062	0	0	0.0425383	0.63629	0.600183	0.0398347	protein_coding	KNOWN	HRASLS2
22602	ENSG00000258498	85.8058	3.52658	11.5241	1.20363	2.92995	0.00339014	0.0420466	0.037504	0.225385	0	0.0394331	1.4523	0.687516	0.495876	lincRNA	KNOWN	DIO3OS
15381	ENSG00000205622	150.38	3.52621	11.5211	1.28184	2.7509	0.00594318	0.062914	0.0334184	0.329364	0.00799799	0.0080314	1.29321	0.373946	1.62453	lincRNA	NOVEL	AF064858.6
23657	ENSG00000264169	4.62583	3.52574	11.5174	2.78684	1.26514	0.205821	0.532464	0.0881439	0.211884	0	0	0	0	2.67802	misc_RNA	KNOWN	RN7SL665P
8161	ENSG00000149043	34.6797	3.52504	11.5118	1.3658	2.58094	0.00985329	0.0892409	0.0167518	0.120806	0	0.00670991	0.861976	0.288749	0.119386	protein_coding	KNOWN	SYT8
16695	ENSG00000223823	12.7802	3.52409	11.5042	1.24729	2.8254	0.00472211	0.0534796	0.0324282	0.116929	0	0	0.582873	0.288644	0.492623	lincRNA	NOVEL	RP11-465B22.5
8263	ENSG00000150201	16.3425	3.51577	11.4381	1.72031	2.04369	0.040984	0.225153	0.0952849	0	0	0.305329	1.847	1.50779	0.0357405	protein_coding	KNOWN	FXYD4
9650	ENSG00000163071	143.236	3.50731	11.3712	2.02216	1.73443	0.082841	0.338442	0.0053161	0.0298179	0.00636148	0.542985	0	4.71383	0.263211	protein_coding	KNOWN	SPATA18
20690	ENSG00000244203	2.62088	3.50357	11.3417	1.5622	2.24272	0.024915	0.167213	0	0.0300674	0	0.0450906	0.198373	0.318097	0.126674	antisense	NOVEL	FOXP1-AS1
18842	ENSG00000233158	22.2427	3.50345	11.3408	1.19445	2.93311	0.00335586	0.0417054	0.328336	0.315708	0.0785802	0.394543	6.04045	0.111334	3.3991	pseudogene	KNOWN	RPS24P6
24163	ENSG00000267868	32.1532	3.50156	11.3259	0.840676	4.16517	3.11122e-05	0.00102504	0.0810081	0.308324	0.0242345	0.0730071	1.15628	1.83697	1.27619	lincRNA	NOVEL	RP11-120K24.3
25502	ENSG00000277011	33.6537	3.50123	11.3234	1.6515	2.12003	0.0340037	0.201439	0.117197	0.258247	0	0	0.278806	2.7818	0.164849	NA	NA	NA
1885	ENSG00000095932	88.7955	3.50056	11.3181	2.12087	1.65053	0.0988342	0.3731	0	1.19427	0	0	6.28489	1.30806	2.58479	protein_coding	KNOWN	C19orf77
18494	ENSG00000231690	7.87621	3.4995	11.3098	1.34576	2.60039	0.00931187	0.0859482	0.0453268	0.00907988	0.01356	0	0.4433	0.0768483	0.0637562	lincRNA	KNOWN	LINC00574
17697	ENSG00000228157	2.7996	3.49867	11.3033	2.18025	1.60472	0.108557	0.391866	0.00848139	0	0	0.0101916	0.116577	0	0.0381755	protein_coding	NOVEL	AC007952.5
21418	ENSG00000250740	2.7996	3.49867	11.3033	2.18025	1.60472	0.108557	0.391866	0.0449775	0	0	0.0540469	0.618216	0	0.202448	antisense	NOVEL	RP11-710F7.2
9237	ENSG00000160188	85.4318	3.49756	11.2946	0.896529	3.90122	9.57093e-05	0.00259479	0.33405	0.12679	0.0210389	0.0950705	0.641325	2.46664	1.80035	protein_coding	KNOWN	RSPH1
649	ENSG00000052344	2543.97	3.49702	11.2903	1.48868	2.34906	0.0188207	0.13895	12.0688	0.0349621	0.125311	4.89705	41.5014	13.9815	89.5363	protein_coding	KNOWN	PRSS8
25056	ENSG00000273132	5.10571	3.49366	11.2641	1.30077	2.68584	0.00723469	0.0724175	0.252566	0.0674589	0	0	1.15717	0.999151	0.663146	antisense	NOVEL	RP11-350J20.12
4397	ENSG00000118557	203.09	3.49113	11.2444	1.0003	3.49008	0.000482883	0.00958918	0.406165	0.0702682	0.0994162	0.149747	1.13216	0.293447	4.69511	protein_coding	KNOWN	PMFBP1
14497	ENSG00000197506	110.189	3.48631	11.2068	1.67475	2.08168	0.0373716	0.213835	0.20752	0	0	0.236897	0.279751	1.85153	1.59959	protein_coding	KNOWN	SLC28A3
14660	ENSG00000198203	324.341	3.4852	11.1983	1.34318	2.59475	0.00946602	0.0868829	0.509763	0.135319	0	0.142804	0.505911	2.22959	3.88515	protein_coding	KNOWN	SULT1C2
9840	ENSG00000163815	5.79205	3.48489	11.1958	1.95568	1.78194	0.0747596	0.319806	0.0237709	0	0.0284453	0.0571283	0	0.0403019	0.85596	protein_coding	KNOWN	CLEC3B
23055	ENSG00000260284	5.0734	3.47721	11.1364	1.20873	2.87675	0.0040179	0.0477462	0.0430604	0.0690071	0.051528	0	0.72845	0.219018	0.484547	pseudogene	KNOWN	TPSP2
4936	ENSG00000124107	383.576	3.47468	11.1169	0.96117	3.61505	0.000300285	0.00658969	3.3054	5.50899	0.105477	4.28966	28.0984	41.8436	40.319	protein_coding	KNOWN	SLPI
5156	ENSG00000125775	203.925	3.472	11.0963	0.503175	6.90019	5.19327e-12	9.35478e-10	0.346529	0.507734	0.236955	0.487787	3.97792	6.50462	2.68501	protein_coding	KNOWN	SDCBP2
14292	ENSG00000196611	18.749	3.47131	11.0909	1.6579	2.09379	0.0362783	0.209476	0.0266669	0.149574	0.0159554	0	1.49434	0.124332	0.0150037	protein_coding	KNOWN	MMP1
6387	ENSG00000135702	2.5773	3.46666	11.0553	1.79053	1.93612	0.0528535	0.262341	0	0.00633569	0.0094618	0	0.00836008	0.0268113	0.0978721	protein_coding	KNOWN	CHST5
23090	ENSG00000260417	10.8677	3.46623	11.052	0.939938	3.68772	0.000226268	0.00519195	0.0152051	0.0060918	0.0363903	0.00913557	0.112536	0.141786	0.282314	lincRNA	NOVEL	CTD-2542L18.1
667	ENSG00000053918	1188.67	3.46588	11.0493	0.969941	3.57329	0.000352526	0.00750229	2.68556	0.445218	1.45644	1.59764	1.41973	31.2666	18.5562	protein_coding	KNOWN	KCNQ1
3475	ENSG00000110777	12.5728	3.4637	11.0326	1.82035	1.90277	0.0570708	0.273523	0	0.0340569	0	0	0.0561735	0.195165	0.0398562	protein_coding	KNOWN	POU2AF1
4020	ENSG00000115339	1961.46	3.45522	10.968	1.24733	2.7701	0.00560389	0.0604916	5.44844	0.574912	0.0268306	2.65386	42.2035	13.0721	16.3241	protein_coding	KNOWN	GALNT3
8726	ENSG00000155066	1100.15	3.45334	10.9537	1.66466	2.07451	0.0380322	0.215927	3.16693	0.00694282	0.0518425	0.551826	4.97453	25.7814	0.277877	protein_coding	KNOWN	PROM2
5756	ENSG00000131126	3.79608	3.44194	10.8675	2.5672	1.34074	0.180005	0.499882	0.0493429	0	0	0	0.295634	0	0.111048	protein_coding	KNOWN	TEX101
17896	ENSG00000228956	31.7654	3.44153	10.8643	1.69689	2.02813	0.0425465	0.22979	0.00388995	0.00155847	0.0418939	0.00233716	0	0.237424	0.164147	processed_transcript	NOVEL	AC144521.1
13686	ENSG00000186471	5.74983	3.43462	10.8124	1.54681	2.22045	0.0263879	0.173925	0	0.0719561	0	0.0269773	0.545949	0.247409	0.0505254	protein_coding	KNOWN	AKAP14
25768	ENSG00000279147	2.35979	3.42895	10.77	1.95222	1.75644	0.0790141	0.329914	0	0.0228649	0	0	0.0301707	0.0483798	0.144496	NA	NA	NA
8323	ENSG00000151067	97.3408	3.42736	10.7582	1.66386	2.05988	0.0394101	0.220532	0.0165002	0.082633	0	0.00826137	0.801051	0.0629433	0.00618906	protein_coding	KNOWN	CACNA1C
17266	ENSG00000226306	3.74065	3.42286	10.7246	2.39364	1.42998	0.152722	0.462795	0.00879079	0.0070439	0	0.0105634	0.213775	0	0	pseudogene	KNOWN	NPY6R
20861	ENSG00000246526	28.7246	3.41989	10.7026	0.976804	3.5011	0.000463337	0.00929086	0.0288488	0.196486	0.0345218	0.069332	1.47935	0.99045	0.22724	lincRNA	NOVEL	RP11-539L10.2
5967	ENSG00000132744	90.4051	3.41918	10.6973	1.12615	3.03616	0.00239615	0.0326288	0.0606159	1.11712	0.265964	0.0242795	3.99492	5.24126	2.63743	protein_coding	KNOWN	ACY3
17346	ENSG00000226644	25.3531	3.41824	10.6904	1.43087	2.38892	0.0168978	0.12932	0.0481078	0.693863	0	0.231234	1.42421	0.285472	6.22546	lincRNA	NOVEL	RP11-128M1.1
15437	ENSG00000205978	233.119	3.41789	10.6878	1.2356	2.76618	0.00567169	0.0609831	0.128775	0.402158	0	0.0912581	2.64979	1.25399	1.09609	protein_coding	KNOWN	NYNRIN
12737	ENSG00000180549	6.86905	3.41722	10.6828	1.52785	2.23662	0.0253112	0.16918	0.0101652	0.0325808	0.0121641	0	0.0644865	0.379156	0.0114386	protein_coding	KNOWN	FUT7
10184	ENSG00000165186	2.30474	3.4168	10.6797	2.68701	1.2716	0.203516	0.529353	0	0.00306944	0	0	0.0243012	0.00487096	0	protein_coding	KNOWN	PTCHD1
20143	ENSG00000239930	6.38865	3.4138	10.6575	1.24316	2.74607	0.00603139	0.063653	0.117002	0.0468757	0.140009	0	0.432974	0.347144	1.64573	sense_intronic	NOVEL	AP001625.4
13467	ENSG00000185271	6.23498	3.41353	10.6555	1.25682	2.71601	0.00660744	0.0680516	0.0145819	0.00389474	0	0.00584075	0.12848	0.0412043	0.0273477	protein_coding	KNOWN	KLHL33
3779	ENSG00000113211	4.03683	3.41269	10.6493	3.4996	0.975165	0.329478	0.663175	0	0.0257773	0	0	0	0.21135	0	protein_coding	KNOWN	PCDHB6
15084	ENSG00000203985	35.7542	3.41122	10.6385	1.34475	2.5367	0.0111902	0.0969999	0.121657	0.0797577	0	0.119609	2.10484	0.412521	0.0497809	protein_coding	KNOWN	LDLRAD1
20512	ENSG00000242808	10.2719	3.40858	10.6191	1.59742	2.1338	0.032859	0.197638	0.00442427	0.00354508	0.00264714	0.00797458	0.137995	0.00937628	0	sense_overlapping	KNOWN	SOX2-OT
20932	ENSG00000247925	2.32335	3.40841	10.6178	1.98814	1.71437	0.0864603	0.346235	0	0.0597931	0	0	0.394491	0.0948869	0.0839698	antisense	NOVEL	RP3-510L9.1
11905	ENSG00000174600	4.69849	3.40495	10.5923	2.32463	1.46473	0.142995	0.447559	0.00461632	0.00739795	0.00552409	0	0	0.140879	0	protein_coding	KNOWN	CMKLR1
25718	ENSG00000278989	15.1083	3.40227	10.5727	1.01415	3.35479	0.000794264	0.0140251	0	0.0446104	0.0666216	0.02676	0.294321	0.169903	0.626481	NA	NA	NA
12394	ENSG00000177984	34.2664	3.40087	10.5624	1.16789	2.91197	0.00359153	0.0439812	0.0181967	0.021871	0.163312	0.0546647	1.25057	0.717288	0.0511905	protein_coding	KNOWN	LCN15
16693	ENSG00000223813	74.908	3.39444	10.5155	1.14661	2.96041	0.00307233	0.0394124	0.364818	0.146161	0	0.613733	4.32012	0.881394	3.65362	antisense	NOVEL	AC007255.8
20305	ENSG00000241187	2.69381	3.39435	10.5148	1.96339	1.72882	0.0838407	0.340495	0	0	0	0.136049	0.658392	0.191955	0.127403	pseudogene	KNOWN	CTC-209L16.1
7831	ENSG00000145864	11.9024	3.39137	10.4931	1.80131	1.88272	0.0597383	0.281531	0	0.0189387	0.00628516	0	0.00277666	0.0200361	0.180264	protein_coding	KNOWN	GABRB2
20676	ENSG00000244128	2.4201	3.39072	10.4884	2.22495	1.52395	0.127521	0.422907	0	0.0113157	0.016899	0	0.0298626	0.191542	0	lincRNA	NOVEL	RP11-85M11.2
14630	ENSG00000198075	3.17519	3.38989	10.4824	1.95322	1.73554	0.0826446	0.338174	0	0.021788	0	0	0.00958322	0.076835	0.101992	protein_coding	KNOWN	SULT1C4
4298	ENSG00000117472	2815.28	3.38108	10.4186	1.09301	3.09337	0.00197894	0.0282883	12.7227	4.41226	0.106279	8.65792	61.3429	61.7089	79.3277	protein_coding	KNOWN	TSPAN1
6549	ENSG00000136688	3.42392	3.37659	10.3861	2.83052	1.19292	0.2329	0.565644	0	0.0305031	0	0.022872	0.42262	0	0	protein_coding	KNOWN	IL36G
17745	ENSG00000228341	50.1511	3.37123	10.3476	1.54939	2.17584	0.0295671	0.185942	0.281431	3.38258	0.224515	0	0.495932	17.4158	12.5619	pseudogene	KNOWN	CTB-20D2.1
19076	ENSG00000234155	88.0737	3.36954	10.3355	1.28243	2.62748	0.00860211	0.0815661	0.313572	0.0167506	0	0.439602	2.24343	1.88732	1.82308	lincRNA	NOVEL	RP11-30P6.6
2365	ENSG00000101846	570.138	3.36887	10.3307	1.42507	2.364	0.0180789	0.1355	0.624347	0	0.809782	0.484027	0.728269	8.42047	5.7066	protein_coding	KNOWN	STS
1143	ENSG00000073605	354.931	3.36657	10.3143	0.835178	4.03096	5.55497e-05	0.00165334	0.515996	0.317222	0.106459	0.379509	1.7872	1.0219	7.40311	protein_coding	KNOWN	GSDMB
17442	ENSG00000227070	8.72627	3.36404	10.2962	0.985933	3.41203	0.000644805	0.011922	0.0551825	0.0884335	0.198101	0.0663097	0.700139	0.608126	1.80076	antisense	NOVEL	RP11-191G24.1
10785	ENSG00000168016	213.985	3.35688	10.2452	0.9742	3.44578	0.000569418	0.0108612	0.0517018	0.271163	0.0112488	0.0875428	0.688279	1.90454	0.658476	protein_coding	KNOWN	TRANK1
23861	ENSG00000266187	6.17492	3.35537	10.2345	1.66953	2.00978	0.0444548	0.235819	0.35982	0	0.107644	0	2.85331	0.533793	0.202448	misc_RNA	KNOWN	RN7SL480P
9004	ENSG00000158022	2.94825	3.3552	10.2333	3.61688	0.92765	0.353589	0.683672	0	0.02454	0	0	0	0	0.195288	protein_coding	KNOWN	TRIM63
20677	ENSG00000244144	4.94379	3.35443	10.2278	1.3278	2.52631	0.0115268	0.0990124	0.0506105	0.0405533	0	0.121632	0.160533	0.429032	1.02511	pseudogene	KNOWN	RP11-757F18.3
6900	ENSG00000138670	277.817	3.34704	10.1756	1.08489	3.08515	0.00203451	0.0289316	0.079964	0.456783	0.0524743	0.0154981	2.82549	1.12176	0.682116	protein_coding	KNOWN	RASGEF1B
5399	ENSG00000128242	83.8075	3.3451	10.1619	1.3318	2.51171	0.0120148	0.101961	0.30472	0.0418571	0.0104183	0.261546	3.53481	0.0590435	1.11685	protein_coding	KNOWN	GAL3ST1
515	ENSG00000039068	11101.6	3.34457	10.1582	1.42696	2.34384	0.0190865	0.140167	22.3504	5.95945	0.00508857	11.6913	137.364	80.3039	87.1266	protein_coding	KNOWN	CDH1
19367	ENSG00000235385	13.4523	3.34037	10.1287	1.81148	1.844	0.0651828	0.296377	0	0.0135178	0.181688	0	1.24859	0.0429032	0.170852	lincRNA	NOVEL	GS1-600G8.5
19421	ENSG00000235568	42.1437	3.33985	10.125	0.747703	4.46681	7.93955e-06	0.000320233	0.0632175	0.0180911	0.0270174	0.0542606	0.744793	0.248812	0.233736	protein_coding	KNOWN	NFAM1
3587	ENSG00000111700	464.929	3.33447	10.0873	1.5634	2.13284	0.032938	0.197837	0.630346	0.00594217	0.701054	1.60401	17.0695	5.12978	0.0417241	protein_coding	KNOWN	SLCO1B3
24063	ENSG00000267338	2.50539	3.3327	10.075	2.15326	1.54775	0.121684	0.413909	0.0481078	0	0	0.0578084	0.203459	0.570943	0	lincRNA	NOVEL	KB-7G2.9
3026	ENSG00000106536	5.23502	3.32969	10.0539	2.79213	1.19252	0.233055	0.565854	0	0.0102282	0.00381874	0	0.107971	0	0	protein_coding	KNOWN	POU6F2
18784	ENSG00000232874	3.45115	3.32871	10.0471	1.39996	2.37771	0.0174206	0.132097	0.122172	0.0489469	0	0	0.387519	0.362483	0.618643	antisense	NOVEL	RP11-135A1.2
1246	ENSG00000076356	879.225	3.32573	10.0264	1.16781	2.84783	0.0044019	0.0508608	0.152482	0.0458178	1.12217	0.116808	3.74434	0.550974	6.5073	protein_coding	KNOWN	PLXNA2
1499	ENSG00000084453	7.82689	3.32493	10.0209	2.01458	1.65044	0.0988533	0.3731	0.00456022	0	0	0.0109595	0.0819665	0.032859	0	protein_coding	KNOWN	SLCO1A2
23837	ENSG00000265972	8086.32	3.31839	9.97554	2.00204	1.6575	0.0974179	0.370317	0	16.7445	33.9136	0.00874333	175.926	88.4257	114.717	NA	NA	NA
3596	ENSG00000111728	23.6309	3.31764	9.97032	1.11296	2.98092	0.00287382	0.0372554	0.00181363	0.0276114	0.00434055	0.00217934	0.120807	0.0338237	0.12245	protein_coding	KNOWN	ST8SIA1
22240	ENSG00000256164	8.32383	3.31346	9.94144	2.09848	1.57898	0.114342	0.402225	0	0.113768	0.226538	0	0.30024	0	2.23677	antisense	NOVEL	RP11-264F23.3
1739	ENSG00000090530	264.559	3.31296	9.93806	1.53636	2.15638	0.0310542	0.191374	0.149963	0.717218	0	0.202727	5.51975	0.0873986	2.3783	protein_coding	KNOWN	LEPREL1
11061	ENSG00000169495	2.32137	3.31238	9.93406	1.64816	2.00975	0.0444576	0.235819	0	0.0100464	0.0150034	0	0.0530256	0.106285	0.0282171	protein_coding	KNOWN	HTRA4
4756	ENSG00000122136	3.94534	3.31115	9.92554	1.99346	1.661	0.0967127	0.368774	0	0.0823764	0	0	0.0271743	0.457537	0.173527	protein_coding	KNOWN	OBP2A
13231	ENSG00000183878	582.106	3.31081	9.92322	0.962032	3.44148	0.000578551	0.0110014	0.308652	0.540434	0.28727	0.302206	5.26677	0.164742	5.28052	protein_coding	KNOWN	UTY
7833	ENSG00000145879	2.49146	3.307	9.89705	2.27087	1.45627	0.145317	0.45109	0.0170012	0	0	0.0204294	0.233682	0	0.038262	protein_coding	KNOWN	SPINK7
8653	ENSG00000154252	33.6371	3.30599	9.89016	1.62053	2.04007	0.0413438	0.226115	0	0.506976	0	0.046078	2.67586	0.812656	0.668817	protein_coding	KNOWN	GAL3ST2
19703	ENSG00000236876	4.67406	3.30328	9.87156	1.29514	2.55052	0.0107562	0.0946223	0.389139	0.155905	0.23283	0	0.822879	1.31951	3.72204	pseudogene	KNOWN	TMSB4XP1
9183	ENSG00000159674	177.36	3.3032	9.87106	0.968112	3.41201	0.000644865	0.011922	0.165997	0.115509	0.25614	0.136479	2.51257	2.3885	0.0835649	protein_coding	KNOWN	SPON2
23645	ENSG00000264012	8.96704	3.30232	9.86497	1.05715	3.1238	0.00178534	0.0261116	0.0731668	0	0.350218	0.175841	1.77928	1.17846	1.23499	antisense	NOVEL	RP11-627G18.2
5405	ENSG00000128268	338.237	3.30166	9.86046	1.53553	2.15017	0.031542	0.192549	0.0722014	1.30749	0.0115199	0.0231361	6.41758	0.224422	3.83482	protein_coding	KNOWN	MGAT3
24455	ENSG00000270124	11.1881	3.30164	9.86033	1.07598	3.06849	0.00215145	0.0301595	0	0.0700405	0.313798	0.0525181	0.831779	0.926239	1.37705	lincRNA	NOVEL	RP11-118F19.1
16244	ENSG00000215583	4.12946	3.29747	9.83189	1.6958	1.94449	0.0518363	0.259382	0.021286	0.0511682	0	0	0.112529	0.433066	0.0239525	pseudogene	KNOWN	ASS1P6
12352	ENSG00000177694	533.275	3.29628	9.82378	1.23506	2.66893	0.00760942	0.0749806	0.643531	0.00309699	0.0485634	0.204354	2.64604	1.66116	2.32032	protein_coding	KNOWN	NAALADL2
15405	ENSG00000205754	32.0758	3.29599	9.8218	1.74815	1.88541	0.0593745	0.280572	0.0293922	0	0.128964	0.11773	1.42953	0.589684	0	protein_coding	KNOWN	SLCO1B7
21746	ENSG00000253508	23.504	3.29402	9.8084	0.676797	4.86707	1.13264e-06	5.98988e-05	0.236213	0.227128	0.339195	0.170306	1.1988	2.48299	3.45545	lincRNA	NOVEL	RP1-170O19.14
13795	ENSG00000187242	3.61223	3.28703	9.76099	1.64657	1.99629	0.0459027	0.240226	0.0281381	0	0	0.0169059	0.223129	0.023853	0.0791574	protein_coding	KNOWN	KRT12
20707	ENSG00000244310	5.72332	3.28557	9.75116	1.96992	1.66787	0.0953411	0.365708	0.0713774	0.114387	0	0.17154	2.56591	0.0605076	0	lincRNA	NOVEL	RP11-734K21.3
5307	ENSG00000127152	506.114	3.27731	9.69548	0.780321	4.19995	2.6697e-05	0.00090126	0.561787	0.0884222	0.584225	0.261187	1.33292	4.7425	4.79014	protein_coding	KNOWN	BCL11B
25952	ENSG00000279905	3.76464	3.27519	9.68125	2.65758	1.23239	0.217802	0.545978	0	0.0148796	0	0	0	0.102322	0.010448	NA	NA	NA
12285	ENSG00000177202	11.6782	3.27134	9.65542	1.04319	3.13589	0.00171331	0.0253286	0	0.0866139	0.0323375	0.162363	0.828594	0.343623	0.851447	protein_coding	KNOWN	SPACA4
19025	ENSG00000233930	21.6844	3.26683	9.62532	0.820274	3.98262	6.8161e-05	0.00195321	0.0537705	0.0143618	0.0536201	0.0538441	0.14213	0.546983	0.554642	antisense	NOVEL	KRTAP5-AS1
13150	ENSG00000183508	793.956	3.26571	9.6178	0.67493	4.83859	1.30767e-06	6.756e-05	0.954578	1.05767	0.54655	0.664088	15.9698	3.46914	3.8238	protein_coding	KNOWN	FAM46C
18665	ENSG00000232453	25.1415	3.26513	9.61397	0.779327	4.18968	2.79349e-05	0.000935363	0.135396	0.024109	0.0900117	0.0903878	1.04981	0.357085	1.01572	lincRNA	NOVEL	RP4-794H19.1
1181	ENSG00000074706	49.358	3.26467	9.6109	1.37581	2.37291	0.0176485	0.133349	0.0557946	0.0645771	0	0.0148989	0.770175	0.0236489	0.188352	protein_coding	KNOWN	IPCEF1
9653	ENSG00000163082	800.251	3.2605	9.58315	1.04388	3.12343	0.00178755	0.0261284	1.61412	3.36906	0.0942209	0.539303	12.3376	22.5204	5.54644	protein_coding	KNOWN	SGPP2
17490	ENSG00000227258	71.6643	3.25834	9.5688	0.954427	3.41392	0.000640353	0.0118832	0.279342	0.181863	0.0313381	0.062938	2.72276	0.377403	0.913538	antisense	NOVEL	SMIM2-AS1
12100	ENSG00000175894	58.4205	3.25727	9.56171	1.13261	2.87591	0.00402871	0.0477784	0.0117499	0.235374	0.0210906	0.0352979	0.428602	0.293836	1.48084	protein_coding	KNOWN	TSPEAR
2884	ENSG00000105668	75.7294	3.25215	9.52782	1.57764	2.0614	0.039265	0.220256	0.942223	0.154079	0.0230103	0.184852	8.57969	0.0163007	0.735689	protein_coding	KNOWN	UPK1A
8790	ENSG00000155886	7.07901	3.2506	9.51761	1.35154	2.40512	0.0161674	0.125393	0.00977463	0	0.00292419	0.0029364	0.0749273	0.00828609	0.0274978	protein_coding	KNOWN	SLC24A2
24592	ENSG00000270933	17.0918	3.24984	9.51261	1.07306	3.02857	0.00245718	0.033137	0.140653	0.338107	0.0420778	0	1.11535	0.775015	1.97841	lincRNA	NOVEL	CTD-2227E11.1
10186	ENSG00000165194	108.374	3.24836	9.50282	1.18849	2.73318	0.00627251	0.0653614	0.0807714	0.163959	0.00322182	0.0129411	0.190727	0.413109	1.2664	protein_coding	KNOWN	PCDH19
12863	ENSG00000181577	1289.63	3.24756	9.49756	1.47171	2.20666	0.027338	0.177434	4.03693	0.499716	0	3.23934	25.6664	7.65723	22.0643	protein_coding	KNOWN	C6orf223
5255	ENSG00000126562	172.96	3.2471	9.49457	0.621499	5.22463	1.74502e-07	1.13768e-05	0.129038	0.173704	0.154412	0.347328	0.933197	1.5708	3.21188	protein_coding	KNOWN	WNK4
8527	ENSG00000152952	6505.89	3.24434	9.47639	1.8423	1.76103	0.0782334	0.328461	14.8099	0.115614	0.00411092	5.20553	125.563	0.943557	16.5995	protein_coding	KNOWN	PLOD2
14154	ENSG00000196114	4.77384	3.24381	9.47292	1.49477	2.17011	0.0299987	0.187684	0	0.0527498	0.157554	0.0791063	0.208813	0.167419	1.62973	pseudogene	KNOWN	RP3-391O22.3
1966	ENSG00000099937	44.965	3.24367	9.47203	0.935391	3.46772	0.000524895	0.010184	0.0205773	0.255567	0.110806	0.0247265	0.848504	0.671579	1.44719	protein_coding	KNOWN	SERPIND1
2338	ENSG00000101489	5.36745	3.2429	9.46696	1.89408	1.71212	0.086874	0.346933	0	0.00966649	0	0.00966424	0.00425171	0.129537	0.00452501	protein_coding	KNOWN	CELF4
24817	ENSG00000272167	6.06278	3.24185	9.46007	1.38855	2.3347	0.0195592	0.142314	0	0.0523301	0.0156301	0	0.193342	0.243595	0.0734893	antisense	NOVEL	RP11-53A1.2
18466	ENSG00000231550	6.67927	3.24147	9.45755	2.11807	1.53039	0.12592	0.419963	0	0.0523996	0	0.0785811	0	0.0739146	0.858513	pseudogene	KNOWN	PTCHD3P2
10888	ENSG00000168542	6.47988	3.24088	9.45369	1.78677	1.81382	0.0697052	0.307776	0.0115696	0.00618035	0.0046149	0	0.0163102	0.143847	0	protein_coding	KNOWN	COL3A1
12372	ENSG00000177839	46.9688	3.23777	9.43335	1.69281	1.91266	0.0557916	0.270177	0	0.00476828	0.234993	0.0143015	0.0251674	0.998827	0.763376	pseudogene	KNOWN	PCDHB9
10298	ENSG00000165807	50.1511	3.23679	9.42696	0.907696	3.56594	0.000362551	0.00766927	0.0764313	0.0952669	0.0203247	0.193891	1.8407	0.568728	0.315355	protein_coding	KNOWN	PPP1R36
3761	ENSG00000112992	3189.84	3.23394	9.40837	3.48451	0.928091	0.35336	0.683426	0	9.21276	0	0	8.21208	20.7517	36.046	protein_coding	KNOWN	NNT
12913	ENSG00000182054	6931.72	3.22985	9.38169	0.666781	4.84394	1.27287e-06	6.60683e-05	21.7117	16.395	10.5332	10.1622	85.6852	54.8282	273.264	protein_coding	KNOWN	IDH2
17814	ENSG00000228611	6.8286	3.2297	9.38072	1.09501	2.94947	0.00318322	0.0403578	0.063091	0.0168512	0	0.0505419	0.266826	0.178277	0.473297	pseudogene	KNOWN	HNF4GP1
24952	ENSG00000272732	9.14152	3.22959	9.37999	1.34457	2.40194	0.0163082	0.12616	0.0634849	0.0635866	0	0	0.570546	0.0941798	0.267892	lincRNA	NOVEL	RP5-1159O4.2
14582	ENSG00000197882	2.79134	3.22938	9.37864	2.58074	1.25134	0.21081	0.538029	0	0.0693863	0	0	0.396745	0.122345	0	pseudogene	KNOWN	OR7E13P
6024	ENSG00000133115	3.75307	3.22639	9.3592	2.07914	1.55179	0.120712	0.41237	0	0.0381808	0	0	0.0503804	0.0100983	0.22788	protein_coding	KNOWN	STOML3
2013	ENSG00000100100	343.916	3.22565	9.35442	0.72826	4.42925	9.45605e-06	0.000370969	0.814584	0.193601	0.983027	0.1742	4.66397	5.85783	4.65305	protein_coding	KNOWN	PIK3IP1
291	ENSG00000012223	6.04005	3.22432	9.3458	1.34486	2.3975	0.0165072	0.127206	0.0123696	0.0198231	0	0	0.026157	0.110102	0.104394	protein_coding	KNOWN	LTF
21394	ENSG00000250591	7.9871	3.22102	9.32443	2.11894	1.52011	0.128484	0.42456	0	0.170193	0	0.0850766	0	1.6505	0.159339	pseudogene	KNOWN	PRSS3P1
24547	ENSG00000270659	5.45068	3.21608	9.29258	1.56007	2.0615	0.0392552	0.220256	0.0380679	0.0610063	0.0911075	0	0.120749	1.16175	0.0428368	lincRNA	NOVEL	RP11-105N14.1
10292	ENSG00000165795	836.956	3.21116	9.26098	1.18696	2.70538	0.00682263	0.0697041	1.88913	0.147748	0.0166528	0.622907	3.77775	6.23175	8.58143	protein_coding	KNOWN	NDRG2
825	ENSG00000064651	26124.8	3.2102	9.25477	0.700595	4.5821	4.60334e-06	0.000199868	16.9587	8.31308	12.6418	21.2721	31.4703	190.541	188.794	protein_coding	KNOWN	SLC12A2
20149	ENSG00000240032	10.228	3.21012	9.25428	1.65494	1.93972	0.0524138	0.260905	0.259334	0	0	0.0890364	1.60601	0.0628118	0.750399	antisense	NOVEL	RP11-274H2.3
23467	ENSG00000262098	2.42368	3.20749	9.23742	2.12724	1.50782	0.131601	0.430182	0	0	0	0.17154	0.830146	0.181523	0.080319	lincRNA	NOVEL	CTD-2561B21.10
9819	ENSG00000163739	78.3757	3.20564	9.22559	1.34315	2.38665	0.0170026	0.129806	0.628297	0.324802	0	0.511444	0.300008	8.19541	1.64208	protein_coding	KNOWN	CXCL1
13580	ENSG00000185869	5.94876	3.20473	9.21978	1.73168	1.85065	0.0642193	0.293894	0	0.00271857	0.0162398	0	0.00717442	0.0143805	0.106898	protein_coding	KNOWN	ZNF829
12724	ENSG00000180438	141.347	3.20303	9.2089	1.60182	1.99962	0.0455416	0.23923	0.0560659	0.831105	0.00838636	0.0168428	0.0592789	1.29513	4.96829	protein_coding	KNOWN	TPRXL
12006	ENSG00000175262	23.56	3.20001	9.18966	1.34184	2.38479	0.0170889	0.130262	0.014703	0.0824686	0.0439856	0.0176677	0.101046	0.0124639	0.992691	protein_coding	KNOWN	C1orf127
16646	ENSG00000223561	4.26379	3.19896	9.18295	1.33865	2.38969	0.0168624	0.129175	0.0265501	0.00709136	0	0	0.0748576	0.0675206	0.0995869	lincRNA	NOVEL	AC003090.1
4993	ENSG00000124406	933.057	3.19622	9.16557	0.898988	3.55536	0.000377461	0.00793022	0.335402	0.30258	1.24056	0.152194	3.03537	9.34493	1.57302	protein_coding	KNOWN	ATP8A1
9947	ENSG00000164125	580.547	3.19381	9.15024	1.45669	2.19251	0.0283429	0.181076	0.306669	0.00267096	1.18469	0.304419	3.74995	8.42069	0.165041	protein_coding	KNOWN	FAM198B
15389	ENSG00000205662	3.10914	3.19267	9.143	1.94003	1.64568	0.099829	0.375393	0	0.0198746	0.0148405	0	0.0131125	0.0105131	0.223285	lincRNA	NOVEL	RP11-706O15.7
832	ENSG00000064763	1638.81	3.19198	9.13866	0.850853	3.75151	0.000175773	0.00425097	3.27668	0.350073	3.18329	0.589152	13.5499	14.1148	23.0407	protein_coding	KNOWN	FAR2
10424	ENSG00000166387	1002.13	3.1915	9.1356	0.599043	5.32766	9.94849e-08	7.00488e-06	0.614542	0.378617	1.1472	0.406973	3.86102	4.15375	9.42935	protein_coding	KNOWN	PPFIBP2
17192	ENSG00000225953	79.8756	3.18823	9.11491	0.517617	6.15944	7.30033e-10	8.95071e-08	0.123401	0.0894622	0.126572	0.0988563	1.59674	0.652561	0.740588	antisense	NOVEL	SATB2-AS1
15276	ENSG00000204869	83.7894	3.18494	9.09419	1.22687	2.59599	0.00943182	0.0866012	0.014103	0.474621	0.0253144	0.0338936	2.05029	1.1776	0.539571	protein_coding	KNOWN	IGFL4
12472	ENSG00000178568	36.2869	3.18374	9.08661	0.557588	5.70985	1.13079e-08	1.02453e-06	0.0080728	0.0194058	0.0193205	0.0218264	0.130165	0.124892	0.211205	protein_coding	KNOWN	ERBB4
20940	ENSG00000248050	7.95944	3.17512	9.03245	1.43969	2.20542	0.027425	0.177811	0	0.0136892	0.0511091	0	0.27998	0.094136	0.0576729	protein_coding	KNOWN	RP11-422N16.3
22539	ENSG00000258122	8.92701	3.17497	9.03151	1.37913	2.30216	0.0213262	0.151111	0.363137	0	0	0.145453	1.91974	0.564366	0.953464	antisense	NOVEL	RP11-61A14.1
26178	ENSG00000283148	10.562	3.17476	9.03021	1.33843	2.37199	0.0176924	0.133541	0	0.224171	0.0371977	0.0373531	1.51186	0.342566	0.244854	NA	NA	NA
2105	ENSG00000100373	14.5934	3.17436	9.02771	1.64345	1.93152	0.053419	0.264243	0.0249923	0.280362	0	0.0300318	2.06111	0.0423726	0.224985	protein_coding	KNOWN	UPK3A
22012	ENSG00000254827	99.1499	3.1738	9.02423	0.933971	3.39818	0.00067835	0.0124292	0.707525	0.153543	0.052916	0.460521	0.950675	4.18596	4.16325	protein_coding	KNOWN	SLC22A18AS
7490	ENSG00000143365	212.491	3.17329	9.02104	1.07621	2.94857	0.00319245	0.040429	0.199685	0.470011	0.00497816	0.154968	1.06444	3.27971	1.28266	protein_coding	KNOWN	RORC
17984	ENSG00000229404	21.5122	3.17194	9.0126	2.20848	1.43625	0.15093	0.459825	0	0.182765	0	0	0.62702	0.00773421	0.615993	lincRNA	NOVEL	LINC00858
12564	ENSG00000179178	834.666	3.16695	8.98144	1.2542	2.52507	0.0115674	0.099281	5.97704	0.682771	0.0147777	3.05692	24.064	19.0739	22.4147	protein_coding	KNOWN	TMEM125
5834	ENSG00000131781	106.41	3.1653	8.97117	0.756964	4.18157	2.89508e-05	0.00096284	0.114204	0.116147	0.052562	0.158345	0.738424	0.286713	1.94743	protein_coding	KNOWN	FMO5
8859	ENSG00000156510	618.611	3.16369	8.96118	1.1666	2.71189	0.00669017	0.0686284	3.07752	0.227323	0.110702	0.192686	3.6321	8.52192	12.1033	protein_coding	KNOWN	HKDC1
1787	ENSG00000091622	450.606	3.16201	8.95076	0.795344	3.97565	7.0187e-05	0.00199964	0.599169	0.156728	0.0592555	0.240987	3.01308	2.78938	1.28995	protein_coding	KNOWN	PITPNM3
988	ENSG00000068985	4.31233	3.16032	8.94031	3.5334	0.894414	0.3711	0.69992	0	0.158249	0	0	1.08583	0	0	protein_coding	KNOWN	PAGE1
10634	ENSG00000167419	13.6065	3.15742	8.92232	1.06662	2.96022	0.00307422	0.0394124	0.00816629	0.0065435	0.0146582	0.0245324	0.03022	0.266523	0.0551358	protein_coding	KNOWN	LPO
2954	ENSG00000106003	1627.12	3.15483	8.90635	0.432382	7.29641	2.9555e-13	6.87125e-11	3.18922	3.09735	2.5473	3.05661	14.4874	25.068	39.8826	protein_coding	KNOWN	LFNG
1427	ENSG00000081923	3885.56	3.15461	8.90495	1.20073	2.62723	0.00860826	0.0815693	8.70298	0.363864	0.122855	5.4045	25.6596	42.1134	29.6951	protein_coding	KNOWN	ATP8B1
12625	ENSG00000179715	28.8098	3.15347	8.89796	1.17296	2.68848	0.00717784	0.0720179	0.100332	0.00803941	0	0.168788	0.541016	0.705937	0.587083	protein_coding	KNOWN	PCED1B
9548	ENSG00000162645	129.302	3.15307	8.89547	1.14222	2.76048	0.00577171	0.0617352	0.422714	0.0268288	0.0200332	0.045263	0.429239	1.91588	1.09262	protein_coding	KNOWN	GBP2
13899	ENSG00000187997	3.30911	3.15277	8.89364	2.06387	1.5276	0.126611	0.421136	0	0.00761751	0	0.0228472	0.0703602	0.128943	0	protein_coding	KNOWN	C17orf99
13197	ENSG00000183734	1503.01	3.15173	8.88719	2.14405	1.46999	0.141565	0.445388	0	20.2744	0.016972	0.0170429	26.0777	45.5195	63.791	protein_coding	KNOWN	ASCL2
14531	ENSG00000197635	1110.34	3.15076	8.88123	1.73082	1.82039	0.0687003	0.305263	5.07613	0.121854	0	0.352875	1.61898	19.7374	15.6196	protein_coding	KNOWN	DPP4
19783	ENSG00000237289	136.609	3.14864	8.86821	1.11183	2.83193	0.00462673	0.0526657	0.575298	0.309339	0.00905824	0.0909608	3.08135	0.667362	2.81945	protein_coding	KNOWN	CKMT1B
5825	ENSG00000131737	9.8039	3.14647	8.85489	1.54868	2.03171	0.0421831	0.228827	0.0300021	0.0721205	0.0179509	0.0180259	0.808898	0.127166	0	protein_coding	KNOWN	KRT34
19963	ENSG00000238065	2.2663	3.14499	8.84581	2.37625	1.32351	0.185665	0.505981	0.0384019	0	0	0.0461453	0	0.0325538	0.518551	pseudogene	KNOWN	AC010740.1
22839	ENSG00000259457	3.48216	3.14463	8.8436	2.79382	1.12557	0.260349	0.595955	0	0.094594	0	0	0	0.0250189	0.631	lincRNA	NOVEL	RP11-279F6.2
22303	ENSG00000256642	7.74553	3.13774	8.80143	1.26589	2.47869	0.0131866	0.108904	0.0361803	0.0144953	0.0649423	0.0217379	0.344283	0.521399	0.0203563	lincRNA	KNOWN	LINC00273
22753	ENSG00000259120	57.9396	3.13336	8.77474	0.730221	4.29097	1.77897e-05	0.00064283	0.653044	0.368229	0.144715	0.174383	4.70541	2.66545	1.52414	protein_coding	KNOWN	SMIM6
9651	ENSG00000163072	379.21	3.13187	8.76573	0.409356	7.65074	1.99827e-14	5.35275e-12	0.40041	0.685798	0.281499	0.457092	4.64104	3.57253	3.82421	protein_coding	KNOWN	NOSTRIN
22094	ENSG00000255240	6.41814	3.13075	8.75888	2.20892	1.41732	0.156389	0.467068	0.035515	0	0	0.00853526	0	0.264937	0.0239784	antisense	NOVEL	RP11-142C4.6
18812	ENSG00000232973	15.7325	3.12563	8.72786	0.837097	3.73389	0.000188545	0.00448503	0.0070553	0.0169598	0.00844268	0.0211949	0.20141	0.0986844	0.0516043	antisense	KNOWN	CYP1B1-AS1
15308	ENSG00000205089	134.635	3.12445	8.72074	1.4215	2.198	0.0279492	0.179744	0.0747634	0.925223	0.0198811	0.0598926	0.087831	2.57033	4.4308	protein_coding	KNOWN	CCNI2
19015	ENSG00000233895	17.9102	3.1204	8.69628	1.091	2.86014	0.00423457	0.0495155	0.120601	0.0966353	0	0.202887	0.20402	1.55397	0.977104	lincRNA	NOVEL	RP1-122P22.2
23478	ENSG00000262188	25.2979	3.11904	8.68812	1.11705	2.79221	0.00523495	0.0575045	0.0559763	0.24669	0	0.0336318	1.05052	0.474519	0.724368	lincRNA	NOVEL	RP11-353N14.4
21907	ENSG00000254306	2.69389	3.11758	8.6793	1.92713	1.61773	0.105721	0.385756	0	0.114594	0	0	0.554435	0.161646	0.107286	lincRNA	NOVEL	RP11-150O12.4
25827	ENSG00000279375	4.82544	3.11745	8.67853	2.55231	1.22142	0.221926	0.551826	0	0	0.3159	0	0	1.11893	0.891177	NA	NA	NA
23971	ENSG00000267015	9.15507	3.11221	8.64709	1.22034	2.55028	0.0107637	0.0946223	0.104649	0	0.187841	0.188626	2.10228	0.620986	0.294396	antisense	NOVEL	RP11-800A18.4
14356	ENSG00000196900	8.38543	3.10565	8.60783	1.3228	2.34779	0.0188852	0.13926	0.0551825	0.13265	0.198101	0.0663097	0.350069	0.0935579	2.48381	protein_coding	KNOWN	C5orf48
21125	ENSG00000249096	3.87801	3.10531	8.6058	1.41959	2.18746	0.0287087	0.1823	0	0.0228195	0.0113596	0	0.0501846	0.0563309	0.128185	lincRNA	NOVEL	RP11-290F5.1
18059	ENSG00000229782	5.92738	3.10421	8.59922	1.19358	2.60076	0.00930182	0.0858877	0	0.227537	0.0849516	0.0853065	1.27602	0.361083	1.0385	antisense	NOVEL	AC118754.4
3177	ENSG00000107957	1467.61	3.09957	8.57162	0.705639	4.39257	1.12019e-05	0.000427999	1.4054	0.528149	0.23796	1.05247	10.3543	6.66337	3.7085	protein_coding	KNOWN	SH3PXD2A
9804	ENSG00000163694	3589.63	3.09815	8.56319	0.954743	3.24501	0.00117447	0.0187716	4.09498	1.14301	0.194979	5.42681	18.4173	23.0095	28.3154	protein_coding	KNOWN	RBM47
26230	ENSG00000283907	1665.66	3.09631	8.55229	0.847276	3.65443	0.000257755	0.005786	6.06159	56.8359	7.50807	16.804	120.646	231.097	207.919	NA	NA	NA
9561	ENSG00000162711	10.1767	3.09346	8.5354	1.37775	2.24529	0.0247494	0.166328	0.00552173	0.0353957	0	0.0132703	0.105087	0.238723	0.0124269	protein_coding	KNOWN	NLRP3
20872	ENSG00000246705	3311.09	3.09267	8.53075	1.55444	1.98958	0.0466378	0.242515	4.08561	16.7386	0	4.75896	83.0352	16.0432	64.6193	protein_coding	KNOWN	H2AFJ
21890	ENSG00000254213	52.5227	3.09039	8.51724	0.951998	3.24621	0.00116953	0.0187155	0.115374	1.26345	0.506227	0.0924258	5.40805	4.85761	2.51	pseudogene	KNOWN	RP11-434I12.5
11126	ENSG00000169894	159.947	3.08993	8.51455	0.651929	4.73968	2.1406e-06	0.000102433	0.332312	0.0722748	0.198829	0.148319	1.1394	1.0906	2.56417	protein_coding	KNOWN	MUC3A
16717	ENSG00000223935	13.2953	3.08745	8.49992	1.002	3.08129	0.00206109	0.0292084	0	0.291109	0.0869491	0.0873123	0.768248	1.10872	1.18557	antisense	NOVEL	AC008074.3
5581	ENSG00000130035	59.9374	3.08551	8.48852	1.70752	1.80701	0.0707601	0.310563	0.00855784	0.160002	0	0	0.174933	0.382076	0.523225	protein_coding	KNOWN	GALNT8
6235	ENSG00000134824	4082.51	3.08499	8.48542	1.14453	2.69542	0.00703005	0.0710326	2.03922	3.48941	1.89003	2.22713	0.204022	25.5767	35.6077	protein_coding	KNOWN	FADS2
20774	ENSG00000244743	5.75423	3.08343	8.4763	1.16396	2.6491	0.00807063	0.0778749	0.083123	0.26642	0.0994686	0	1.05464	0.493252	1.49658	pseudogene	KNOWN	RP11-8P13.1
11266	ENSG00000170608	571.743	3.0832	8.47492	1.21413	2.53942	0.0111036	0.0966075	3.37922	1.13301	0.0143395	2.2751	12.6825	4.73372	25.8223	protein_coding	KNOWN	FOXA3
21066	ENSG00000248735	2.90464	3.083	8.47375	1.5817	1.94917	0.0512748	0.257723	0	0.0214767	0.0160368	0	0.0425084	0.159048	0.0452409	pseudogene	KNOWN	R3HDM2P1
134	ENSG00000006611	1518.92	3.08278	8.47246	1.52198	2.02551	0.0428153	0.230382	5.09912	1.27468	0	1.70561	2.87123	22.7526	25.7181	protein_coding	KNOWN	USH1C
3268	ENSG00000108771	75.1434	3.0826	8.47138	1.10156	2.79839	0.0051358	0.0568301	0.23239	0.153349	0	0.123198	0.845523	1.95841	0.4384	protein_coding	KNOWN	DHX58
14711	ENSG00000198478	3873.41	3.08255	8.47113	0.510635	6.03671	1.57291e-09	1.71517e-07	5.5887	7.16047	6.84305	2.12322	54.1835	36.7859	47.0199	protein_coding	KNOWN	SH3BGRL2
9098	ENSG00000158859	8.50529	3.08144	8.46461	1.27401	2.4187	0.015576	0.122637	0.00762537	0.00203669	0.00608324	0.00610865	0.0161247	0.1142	0.00572041	protein_coding	KNOWN	ADAMTS4
25558	ENSG00000277539	4.55628	3.07998	8.45605	1.43526	2.14594	0.0318779	0.193832	0	0	0.210014	0.0702971	0.742241	0.595103	0.329147	NA	NA	NA
23943	ENSG00000266916	2.33054	3.07549	8.42976	3.63434	0.84623	0.397424	0.722933	0	0	0.0475883	0	0	0	0.290875	antisense	NOVEL	CTD-3064H18.1
7020	ENSG00000139567	130.553	3.07433	8.42298	1.5138	2.03087	0.0422685	0.228834	0.317913	0.0918726	0	0.269291	1.15717	0.0309261	3.10235	protein_coding	KNOWN	ACVRL1
11315	ENSG00000170915	2467.94	3.06936	8.39399	0.797797	3.84729	0.000119431	0.00310143	6.53945	1.06547	1.74657	3.48277	30.0568	42.0854	8.65037	protein_coding	KNOWN	PAQR8
4429	ENSG00000118972	10.8524	3.06529	8.37038	1.76541	1.73631	0.0825094	0.338009	0.0087034	0.0836866	0	0	0.322076	0.265608	0.0097937	protein_coding	KNOWN	FGF23
18552	ENSG00000231911	3.16052	3.06389	8.36226	2.32844	1.31586	0.188221	0.509616	0	0.0437571	0	0.131241	1.03929	0.0462927	0	pseudogene	KNOWN	TPRKBP1
3609	ENSG00000111816	1329.8	3.06299	8.35704	1.94509	1.57473	0.115319	0.403683	2.11644	0.023863	0.00237582	0.510549	12.5132	0.00168305	4.11525	protein_coding	KNOWN	FRK
132	ENSG00000006606	70.2423	3.06294	8.35676	1.20039	2.55162	0.0107224	0.0944971	0.446462	1.0136	0	1.16239	11.0145	4.19473	1.25598	protein_coding	KNOWN	CCL26
16751	ENSG00000224060	10.6758	3.06105	8.34578	0.914791	3.34617	0.000819363	0.0143616	0.134357	0.134573	0.0401945	0.0403624	1.17197	0.34169	0.755943	pseudogene	KNOWN	ARSEP1
12730	ENSG00000180525	85.8749	3.06097	8.34535	0.895312	3.41889	0.000628771	0.0117061	0.0142029	0.0250372	0.142765	0.064854	0.822924	0.510496	0.201375	protein_coding	KNOWN	PRR26
10087	ENSG00000164749	777.929	3.05722	8.32367	1.01637	3.00798	0.0026299	0.0348635	1.42648	0.0262761	1.72007	1.11647	9.43075	7.2045	10.1292	protein_coding	KNOWN	HNF4G
8422	ENSG00000151882	159.511	3.05168	8.2918	1.69575	1.79961	0.0719222	0.313431	0.0580612	0.869987	0	0.00697688	0.435859	1.12712	4.26635	protein_coding	KNOWN	CCL28
10695	ENSG00000167676	163.147	3.05082	8.28684	1.13024	2.69926	0.00694945	0.0705896	0.234309	0.0744517	0.043508	0.315537	1.31984	2.76708	0.0590966	protein_coding	KNOWN	PLIN4
24986	ENSG00000272861	13.4378	3.05047	8.28481	1.17808	2.58936	0.00961553	0.0879203	0.268715	0.538291	0	0.0807248	0.4972	2.56267	2.6458	lincRNA	NOVEL	RP11-332H14.1
1166	ENSG00000074276	66.1666	3.04955	8.27955	0.891863	3.4193	0.000627814	0.0117034	0.0540269	0.110195	0.0764056	0.0885286	0.140211	1.6113	0.292921	protein_coding	KNOWN	CDHR2
23500	ENSG00000262445	3.1327	3.04926	8.27786	2.0863	1.46156	0.143861	0.448868	0.0603836	0	0	0.0362798	0.414987	0.179158	0	antisense	NOVEL	CTD-2545H1.2
11022	ENSG00000169242	1842.11	3.0474	8.26719	0.714223	4.26673	1.98356e-05	0.000703352	6.62103	3.32411	5.78133	3.60512	80.4507	11.0501	28.3583	protein_coding	KNOWN	EFNA1
1526	ENSG00000085465	129.436	3.04387	8.247	0.76849	3.96085	7.46848e-05	0.00211313	0.460463	0.139385	0.122447	0.627088	4.11119	2.95792	1.25507	protein_coding	KNOWN	OVGP1
3131	ENSG00000107593	3.9808	3.04107	8.23103	1.7932	1.6959	0.0899057	0.353766	0.0342798	0	0	0	0.0724885	0.0363243	0.106079	protein_coding	KNOWN	PKD2L1
3740	ENSG00000112782	500.962	3.03913	8.21996	1.25303	2.42543	0.0152904	0.120968	0.0671488	1.26793	0.0139745	0.140329	4.6395	2.97979	1.57363	protein_coding	KNOWN	CLIC5
19903	ENSG00000237845	2.79132	3.03659	8.20552	2.13937	1.41939	0.155786	0.466503	0	0.0568842	0	0.0426532	0.11259	0.511534	0	lincRNA	NOVEL	RP5-940F7.2
5857	ENSG00000131981	12784	3.03639	8.20436	0.762723	3.98099	6.86288e-05	0.00196205	34.7376	64.8362	8.40549	35.0529	468.686	121.106	290.37	protein_coding	KNOWN	LGALS3
25362	ENSG00000275542	7.82091	3.03491	8.19596	0.897622	3.38106	0.00072207	0.0130688	0.0516049	0.1654	0.0617526	0.124021	0.872996	0.5687	1.10332	NA	NA	NA
14111	ENSG00000189221	2622.19	3.03355	8.18822	1.39093	2.18095	0.0291872	0.184338	7.45527	2.15878	0.011372	3.11751	11.2234	5.75601	61.2802	protein_coding	KNOWN	MAOA
755	ENSG00000060558	37.028	3.03257	8.18263	1.49136	2.03342	0.0420098	0.22839	0.0201048	0.0966575	0.240582	0.0241587	2.18946	0.136345	0.0113117	protein_coding	KNOWN	GNA15
18624	ENSG00000232237	57.1506	3.03123	8.17506	0.602462	5.03141	4.86895e-07	2.83665e-05	0.259298	0.186994	0.201687	0.109054	2.20697	1.74749	0.700274	protein_coding	KNOWN	ASCL5
17274	ENSG00000226321	4.02919	3.0281	8.15737	2.60033	1.16451	0.244218	0.578668	0	0.0176039	0	0	0.0185829	0.0931197	0	protein_coding	NOVEL	AC104809.3
12428	ENSG00000178217	7.51677	3.02357	8.1318	1.56477	1.93229	0.0533242	0.263986	0.0240815	0.014472	0	0.00723434	0.260981	0.0102071	0.0135491	protein_coding	KNOWN	SH2D4B
21324	ENSG00000250282	4.76644	3.02062	8.11518	1.33304	2.26597	0.0234533	0.160937	0	0.146841	0.146196	0	0.90421	0.310699	0.618643	antisense	NOVEL	RP5-875H18.4
3641	ENSG00000112053	7.28753	3.01955	8.10914	1.7456	1.7298	0.0836652	0.340221	0	0.0313825	0	0	0.0874207	0.044268	0.0685559	protein_coding	KNOWN	SLC26A8
19106	ENSG00000234286	2.77643	3.01916	8.10695	2.05709	1.46768	0.14219	0.446329	0	0.294366	0.219805	0	0	1.55712	1.65356	antisense	NOVEL	AC006026.13
21985	ENSG00000254675	3.71493	3.01817	8.10137	1.33419	2.26217	0.0236871	0.161659	0.189653	0.151965	0	0	0.601563	0.562699	1.06705	antisense	NOVEL	RP11-7I15.4
13824	ENSG00000187566	37.4696	3.01645	8.09176	2.0166	1.49581	0.134702	0.434925	0	0.449406	0	0	0.506521	0.742887	1.49891	protein_coding	KNOWN	NHLRC1
11899	ENSG00000174567	328.903	3.01644	8.09169	1.23747	2.43758	0.0147859	0.118076	3.07526	2.27887	0	2.50062	14.0328	7.89922	25.7586	protein_coding	KNOWN	GOLT1A
25029	ENSG00000273018	4.99902	3.01357	8.07558	1.74259	1.72936	0.0837438	0.340312	0	0.00546467	0.0040805	0.00819509	0.0865289	0.0202346	0	processed_transcript	NOVEL	CTD-2303H24.2
7587	ENSG00000143850	2491.86	3.01125	8.06261	0.513632	5.86265	4.55541e-09	4.49054e-07	1.32114	3.28806	1.98855	1.62197	9.70394	15.9465	24.0693	protein_coding	KNOWN	PLEKHA6
14178	ENSG00000196196	39.9057	3.00911	8.05068	1.35338	2.22341	0.026188	0.172931	0.248844	0.753267	0	0.132899	5.20363	0.257826	1.46231	protein_coding	KNOWN	HRCT1
21376	ENSG00000250519	4.26658	3.00491	8.02725	1.63847	1.83397	0.066658	0.300228	0.0363304	0.116444	0	0	0.384124	0.55436	0.0408816	lincRNA	NOVEL	RP11-680H20.2
18278	ENSG00000230731	21.4907	3.0004	8.00224	1.11998	2.67899	0.00738446	0.0734653	0.0708639	0.0567819	0	0.0473073	0.765899	0.10012	0.194923	lincRNA	NOVEL	RP11-478K15.6
8957	ENSG00000157557	16006.1	2.99669	7.98167	0.721662	4.15249	3.28881e-05	0.00107779	19.2643	54.9425	8.50274	12.9413	159.592	146.326	266.711	protein_coding	KNOWN	ETS2
20529	ENSG00000243004	17.0287	2.99617	7.97878	1.32776	2.25656	0.0240355	0.163087	0.112689	0.00820872	0	0.0615511	0.151642	0.121582	0.818477	sense_overlapping	NOVEL	AC005062.2
7090	ENSG00000140107	3.76849	2.99595	7.97756	1.39656	2.14524	0.0319336	0.194055	0.0146008	0.0233987	0.017472	0	0.108063	0.0247546	0.213589	protein_coding	KNOWN	SLC25A47
23643	ENSG00000263982	2.97816	2.9939	7.96624	1.594	1.87823	0.0603494	0.282909	0	0.0528823	0.15795	0	0.348897	0.727307	0.14853	antisense	NOVEL	RP11-504I13.3
9639	ENSG00000163017	32.156	2.99288	7.9606	1.62425	1.84262	0.0653841	0.296794	0.220556	0.0110455	0	0	0.378943	0.426522	0.581686	protein_coding	KNOWN	ACTG2
22444	ENSG00000257594	77.0952	2.99046	7.94725	0.543086	5.50642	3.66212e-08	2.87418e-06	0.102168	0.0818653	0.0989712	0.111077	0.715009	0.387679	1.24273	protein_coding	KNOWN	GALNT4
23529	ENSG00000262823	44.4939	2.98889	7.93864	1.36033	2.19719	0.0280071	0.179882	0.124017	0.993728	0	0.0298049	2.59627	2.58623	1.73046	antisense	NOVEL	RP13-580F15.2
9575	ENSG00000162755	90.773	2.98612	7.9234	0.969584	3.0798	0.00207143	0.0293212	0.0610858	1.04012	0.255843	0.0917541	3.3585	2.65389	2.6636	protein_coding	KNOWN	KLHDC9
21134	ENSG00000249162	13.8581	2.98184	7.89992	2.17664	1.36993	0.17071	0.487179	0	0.17989	0	0	0.0923102	0.962145	0.0280697	pseudogene	KNOWN	ADAM20P3
24287	ENSG00000269001	253.393	2.98048	7.89246	2.01543	1.47883	0.139186	0.441567	0	1.69333	0	0.0389479	6.88136	1.00563	2.37801	pseudogene	KNOWN	ZNF818P
4213	ENSG00000116771	1252.15	2.98027	7.89131	1.36238	2.18755	0.0287024	0.1823	0.084054	6.32257	7.39283	0.0883775	23.1842	15.9697	43.0474	protein_coding	KNOWN	AGMAT
18693	ENSG00000232555	36.3557	2.97982	7.88887	1.71812	1.73434	0.0828571	0.338442	0	1.89837	0	0.061889	4.08414	2.35766	5.27396	lincRNA	NOVEL	AC104088.1
3291	ENSG00000108878	4.1371	2.979	7.88439	2.30507	1.29237	0.196229	0.519986	0.0414959	0	0	0.0498632	0.0219369	0	0.513635	protein_coding	KNOWN	CACNG1
22787	ENSG00000259291	96.0664	2.97896	7.8842	0.757593	3.93214	8.41914e-05	0.0023365	0.262488	0.348127	0.173299	0.130517	0.698611	0.959114	3.7787	antisense	NOVEL	RP11-617F23.1
16409	ENSG00000219073	2.56028	2.97138	7.84287	2.09651	1.4173	0.156395	0.467068	0.0170453	0.0273162	0	0	0.0720887	0.202294	0	protein_coding	KNOWN	CELA3B
24769	ENSG00000271983	5.09899	2.96901	7.83	1.29537	2.29202	0.0219044	0.153662	0	0.0427788	0.191659	0.0641533	1.0725	0.316804	0.30038	lincRNA	NOVEL	RP11-28H5.2
24475	ENSG00000270210	5.14336	2.96719	7.82011	1.468	2.02124	0.043255	0.23158	0.0677855	0.108631	0	0	0.752536	0.229851	0.114416	lincRNA	NOVEL	RP11-373D23.3
13077	ENSG00000183036	16.7516	2.96645	7.81611	1.29455	2.29149	0.0219349	0.153803	0.0237494	0.17127	0.227357	0	0.125552	1.36902	0.988809	protein_coding	KNOWN	PCP4
9433	ENSG00000161955	104.572	2.96389	7.80227	0.967325	3.06401	0.00218392	0.030476	0.0923264	0.897002	0.220964	0.0693396	1.61069	4.19703	1.72721	protein_coding	KNOWN	TNFSF13
19336	ENSG00000235277	8.99691	2.9627	7.79583	2.02417	1.46366	0.143287	0.447809	0.100897	0.215592	0	0	0.568956	0	1.32459	antisense	NOVEL	AF127577.8
10915	ENSG00000168743	1764.8	2.95825	7.77181	1.37753	2.14751	0.0317527	0.193309	3.70579	0.467944	0.00513848	3.92672	27.6223	7.69163	11.9302	protein_coding	KNOWN	NPNT
13139	ENSG00000183463	3.79834	2.95265	7.74168	3.56239	0.828839	0.407196	0.728996	0	0.113035	0	0	0	0.669678	0	protein_coding	KNOWN	URAD
16228	ENSG00000215444	3.39486	2.9461	7.70661	2.78129	1.05926	0.289483	0.628382	0.114453	0.0917088	0	0	0	1.21279	0	pseudogene	KNOWN	RP5-827A12.2
10495	ENSG00000166763	7.10955	2.94511	7.70135	1.21231	2.42933	0.0151268	0.119905	0.0147899	0.0158012	0	0.00592406	0.1251	0.0167168	0.0776658	pseudogene	KNOWN	STRCP1
23483	ENSG00000262223	6.89518	2.94117	7.68035	1.0636	2.76531	0.00568684	0.0610394	0.0487326	0.0195243	0.0291578	0.0878388	0.128813	0.309835	0.603212	lincRNA	NOVEL	RP11-1055B8.3
3953	ENSG00000114861	2222.41	2.93949	7.67141	0.828423	3.5483	0.000387726	0.00810207	0.96371	0.169885	2.67777	0.822205	11.2124	7.16792	8.27208	protein_coding	KNOWN	FOXP1
16970	ENSG00000224984	3.05227	2.92899	7.61579	1.95576	1.49762	0.134232	0.434122	0.044824	0	0	0.107725	0.758285	0.0379979	0.0504392	antisense	NOVEL	RP11-524H19.2
22902	ENSG00000259699	4.64145	2.92875	7.6145	1.12209	2.61008	0.00905213	0.0841179	0.0276785	0.0443565	0	0.0665193	0.175588	0.281561	0.342604	pseudogene	KNOWN	HMGB1P8
7884	ENSG00000146233	331.114	2.92784	7.60973	0.573808	5.10248	3.35224e-07	2.01987e-05	0.734561	0.473578	1.47512	0.365247	5.32947	6.66357	5.37752	protein_coding	KNOWN	CYP39A1
21003	ENSG00000248429	10.1688	2.92495	7.59447	1.71002	1.71047	0.0871784	0.347698	0.0186323	0	0.00557405	0.0279867	0.187151	0.106615	0	antisense	NOVEL	RP11-597D13.9
15938	ENSG00000213994	7.75746	2.92271	7.5827	1.06781	2.7371	0.0061983	0.0648085	0.05997	0.0961058	0.143526	0.216188	1.9022	0.305024	0.674826	antisense	NOVEL	RP11-414H17.5
1400	ENSG00000081041	48.9219	2.92267	7.58248	0.849356	3.44104	0.000579476	0.0110105	0.28018	0.154346	0.104774	0.399803	0.42584	3.41424	1.47787	protein_coding	KNOWN	CXCL2
19646	ENSG00000236617	6.87108	2.92246	7.58137	1.77267	1.64862	0.0992255	0.374015	0	0.341305	0	0	0.5004	0.521564	1.01187	antisense	NOVEL	RP11-46H11.12
23209	ENSG00000260913	2.99225	2.92068	7.57203	3.59377	0.812706	0.416386	0.735573	0	0.026105	0	0	0	0.151897	0	lincRNA	NOVEL	RP11-243E13.1
24809	ENSG00000272141	67.1554	2.91435	7.53886	1.10958	2.62652	0.00862621	0.0816376	0.37258	1.19417	0	0.38375	1.96966	4.94065	4.19254	lincRNA	NOVEL	RP11-465B22.8
17622	ENSG00000227881	127.184	2.91377	7.53584	0.69079	4.21802	2.46452e-05	0.000844724	0.699602	1.25705	0.355165	0.636873	1.88286	6.63151	8.23026	pseudogene	KNOWN	ASS1P5
6020	ENSG00000133106	136.927	2.91099	7.52137	1.27197	2.28857	0.0221044	0.154828	0.138696	0.534301	0	0.128202	1.38748	0.529085	2.61718	protein_coding	KNOWN	EPSTI1
10015	ENSG00000164398	124.169	2.91069	7.51976	1.56518	1.85965	0.0629354	0.290307	0.0867959	0.171444	0	0.0169787	0.138722	1.38258	0.0340706	protein_coding	KNOWN	ACSL6
17076	ENSG00000225455	2.6065	2.90854	7.50856	1.70136	1.70954	0.0873514	0.347937	0	0.0889944	0	0.0667302	0.11743	0.659059	0.124978	pseudogene	KNOWN	TPI1P4
2608	ENSG00000103710	2.62265	2.90782	7.50483	1.77511	1.63811	0.101399	0.378159	0	0.015023	0.0112177	0	0.118939	0.0238402	0.0105487	protein_coding	KNOWN	RASL12
20533	ENSG00000243056	19.4008	2.90583	7.49448	1.04117	2.79093	0.00525574	0.0576424	0.114039	0.456885	0.181951	0.0456779	0.401913	1.06339	3.12256	protein_coding	KNOWN	EIF4EBP3
19981	ENSG00000238121	3.29016	2.90309	7.48025	1.69058	1.71722	0.0859397	0.345103	0.00661301	0.0158967	0	0	0.0489439	0.00560594	0.0818558	lincRNA	NOVEL	LINC00426
9707	ENSG00000163362	1207.04	2.90176	7.47338	1.21706	2.38424	0.0171145	0.130417	2.39231	3.88438	0.0638746	0.134114	6.85967	12.0651	17.3806	protein_coding	KNOWN	C1orf106
19899	ENSG00000237833	530.883	2.9016	7.47256	0.704479	4.11879	3.80863e-05	0.00121423	2.20113	6.17305	0.921891	1.45474	19.2776	18.5349	22.5602	pseudogene	KNOWN	RP11-432N13.2
20942	ENSG00000248092	434.304	2.89675	7.44744	3.27389	0.884802	0.376264	0.704085	0	1.92239	0	0	1.99217	3.53291	5.21522	antisense	NOVEL	NNT-AS1
23228	ENSG00000260996	20.2074	2.89674	7.44742	1.31708	2.19936	0.0278521	0.179435	0.042503	0.0567615	0.220398	0	0.194735	1.4172	0.159425	sense_overlapping	NOVEL	RP13-122B23.8
15523	ENSG00000207607	5.51843	2.89464	7.43657	1.45346	1.99156	0.0464199	0.241906	0.291854	1.40314	0	0	2.16006	5.93781	1.97049	miRNA	KNOWN	MIR200A
18381	ENSG00000231170	3.63713	2.89274	7.4268	1.2087	2.39326	0.0166994	0.128245	0.0503679	0.0201795	0	0.0302621	0.213018	0.213488	0.141694	antisense	NOVEL	AC002451.3
19849	ENSG00000237629	4.68999	2.89245	7.42533	2.22231	1.30155	0.193069	0.516781	0.364818	0	0	0.109595	0.289293	0	2.36049	pseudogene	KNOWN	UQCRHP2
14878	ENSG00000198944	193.139	2.88977	7.41153	1.28111	2.25568	0.0240905	0.163267	0.359932	1.19951	0.0195778	0.176936	0.302718	1.99715	7.4837	protein_coding	KNOWN	SOWAHA
22147	ENSG00000255521	5.64144	2.88896	7.40736	1.4071	2.05313	0.0400602	0.222202	0	0.104022	0	0.0259995	0.205889	0.385175	0.17043	antisense	NOVEL	RP4-607I7.1
21616	ENSG00000251728	6.33644	2.8876	7.40041	1.61208	1.79123	0.073256	0.317072	0	1.53469	0	0.328785	8.10022	1.15973	1.53945	misc_RNA	NOVEL	Y_RNA
13495	ENSG00000185432	599.901	2.88637	7.39406	1.39051	2.07577	0.0379154	0.215621	3.71841	0.108251	0.0153966	0.463827	14.2432	3.59388	6.04468	protein_coding	KNOWN	METTL7A
5306	ENSG00000127129	60.9058	2.88499	7.387	1.67747	1.71984	0.0854612	0.344135	0.0320523	0.975952	0	0.0770309	5.06643	0.869478	0.108203	protein_coding	KNOWN	EDN2
19338	ENSG00000235280	116.857	2.88361	7.37997	0.74134	3.88973	0.000100354	0.00269697	0.737834	2.89694	0.662193	0.487637	8.85433	6.47363	11.3746	antisense	NOVEL	MCF2L-AS1
6475	ENSG00000136153	4177.1	2.88353	7.37954	0.850212	3.39155	0.000694996	0.0126683	0.471696	2.75853	4.72564	0.579992	16.5044	13.2017	17.5365	protein_coding	KNOWN	LMO7
4341	ENSG00000117834	9.16152	2.88262	7.37486	1.16359	2.47735	0.0132361	0.109167	0.0173761	0.0139232	0.020793	0.00695996	0.0367438	0.0245499	0.267222	protein_coding	KNOWN	SLC5A9
7257	ENSG00000141448	773.127	2.87974	7.36017	1.09162	2.63803	0.00833884	0.0799309	1.99748	0.0213406	2.64524	1.10412	9.70794	9.80416	12.3174	protein_coding	KNOWN	GATA6
25457	ENSG00000276524	2.87862	2.87921	7.35748	1.33408	2.15819	0.0309127	0.191103	0.0440719	0	0.0527384	0.0529587	0.279586	0.298883	0.198372	NA	NA	NA
20520	ENSG00000242861	49.9536	2.87843	7.35348	0.76535	3.76093	0.000169284	0.00412393	0.830275	1.39105	1.44515	0.544197	5.58636	2.62339	15.1184	antisense	NOVEL	RP11-285F7.2
22462	ENSG00000257681	18.4249	2.87678	7.34509	0.693049	4.1509	3.31165e-05	0.00108383	0.0494203	0.138598	0.0887077	0.237542	1.20181	0.775043	0.834169	antisense	NOVEL	RP11-341G23.4
12647	ENSG00000179913	1828.68	2.87139	7.31772	1.41781	2.02523	0.0428437	0.230382	12.0433	4.71983	0	6.73517	41.7971	39.2596	47.9135	protein_coding	KNOWN	B3GNT3
4592	ENSG00000120341	3.48093	2.87108	7.31614	1.47334	1.94869	0.0513328	0.257752	0.00356064	0.00570616	0	0.00427862	0.0037647	0.0211288	0.052087	protein_coding	KNOWN	SEC16B
18795	ENSG00000232913	3.58726	2.86596	7.29019	1.58439	1.80888	0.0704704	0.309629	0.0123667	0.00495461	0	0.00743018	0.111141	0.00524171	0.0208739	antisense	NOVEL	RP11-429H9.4
2523	ENSG00000103089	463.426	2.8657	7.2889	0.670574	4.2735	1.92426e-05	0.00068528	2.17088	0.571271	0.824385	0.625685	12.5267	5.52765	4.86764	protein_coding	KNOWN	FA2H
24538	ENSG00000270605	14.6379	2.86432	7.28193	0.768401	3.72764	0.000193283	0.00456702	0.0675241	0.0865693	0.0161605	0.0486839	0.371248	0.595307	0.258342	antisense	NOVEL	RP5-1092A3.4
13409	ENSG00000185008	20.6137	2.85824	7.25131	2.63668	1.08403	0.27835	0.61617	0	0.0366301	0	0	0	0.0587972	0.141907	protein_coding	KNOWN	ROBO2
11050	ENSG00000169413	23.5262	2.85767	7.24843	2.00837	1.42288	0.154772	0.464636	0	0.654624	0	0	0.706738	0.524665	2.36793	protein_coding	KNOWN	RNASE6
2800	ENSG00000105251	63.732	2.85588	7.23946	0.501828	5.69095	1.26332e-08	1.12802e-06	0.186886	0.194673	0.167727	0.123514	1.00774	0.807973	1.86114	protein_coding	KNOWN	SHD
1554	ENSG00000086159	16.6219	2.85032	7.21162	0.830644	3.43146	0.000600331	0.0112936	0.04097	0.0410356	0.00612831	0.00615391	0.189516	0.182337	0.155596	protein_coding	KNOWN	AQP6
8290	ENSG00000150676	5.30049	2.85019	7.21097	1.8604	1.53204	0.125514	0.419666	0.0668085	0	0	0	0.0470914	0.179342	0.137826	protein_coding	KNOWN	CCDC83
17263	ENSG00000226281	5.03352	2.8478	7.19904	1.55446	1.83202	0.0669477	0.300905	0.092489	0.111165	0	0.0555694	1.27126	0.117606	0.0520376	lincRNA	NOVEL	RP1-80N2.2
1596	ENSG00000087250	12.1672	2.84763	7.19814	1.872	1.52117	0.128218	0.423907	0	0.194775	0	0	0.196537	0.557579	0.321801	protein_coding	KNOWN	MT3
17988	ENSG00000229417	7.06329	2.84668	7.19345	1.24446	2.28748	0.0221678	0.154967	0.0615149	0.0739362	0.0368057	0.073919	0.0325201	0.338956	0.969095	pseudogene	KNOWN	NPM1P25
21058	ENSG00000248705	2.90907	2.84607	7.19041	2.82511	1.00742	0.313733	0.649926	0	0.111214	0	0	0.586994	0	0.0390454	pseudogene	KNOWN	AC114812.10
23148	ENSG00000260660	5.6551	2.84331	7.17667	1.40269	2.02704	0.0426584	0.230085	0.0222726	0.0237956	0	0	0.172693	0.0377616	0.0501256	antisense	NOVEL	RP11-69H7.2
7496	ENSG00000143375	2215.7	2.84204	7.17034	0.894665	3.17665	0.00148984	0.0228048	4.68484	0.585351	3.3684	1.436	24.3216	3.65167	26.2022	protein_coding	KNOWN	CGN
8607	ENSG00000153902	17.2354	2.84038	7.16208	0.989536	2.87041	0.00409934	0.0482907	0.0289793	0.0232206	0.0208068	0.0417874	0.484113	0.0589588	0.0717412	protein_coding	KNOWN	LGI4
550	ENSG00000043039	130.28	2.83874	7.15394	1.87371	1.51504	0.129763	0.42684	0.0645907	1.00635	0	0	1.54796	3.76589	0.444168	protein_coding	KNOWN	BARX2
13346	ENSG00000184635	109.783	2.83863	7.15341	1.95384	1.45285	0.146266	0.452659	0	0.611436	0.0643046	0	0.0454536	1.43495	2.15271	protein_coding	KNOWN	ZNF93
12123	ENSG00000176092	1075.68	2.83638	7.14223	1.30885	2.16707	0.0302294	0.188553	1.46723	2.36872	0.00519453	1.52314	18.2578	1.954	8.5287	protein_coding	KNOWN	AIM1L
23437	ENSG00000261829	13.217	2.83253	7.12321	1.21275	2.33563	0.0195105	0.142085	0.0439245	0.105588	0.473058	0.0527816	0.325092	0.521296	2.71849	sense_overlapping	NOVEL	RP11-223I10.1
1207	ENSG00000075340	8.0026	2.83052	7.11329	2.18978	1.2926	0.196149	0.51993	0.0165813	0	0	0.0024906	0.0810834	0	0.0209908	protein_coding	KNOWN	ADD2
2300	ENSG00000101333	1404.6	2.82707	7.09629	0.665162	4.25019	2.13591e-05	0.00074982	0.818461	3.53836	0.952073	0.864563	9.09237	10.2556	13.5321	protein_coding	KNOWN	PLCB4
1097	ENSG00000072201	583.477	2.82513	7.08678	0.711659	3.96978	7.19397e-05	0.00204014	1.66089	0.257345	0.362361	0.815962	4.19129	5.91966	6.34516	protein_coding	KNOWN	LNX1
25290	ENSG00000274937	5.08943	2.82221	7.07244	1.61104	1.7518	0.0798089	0.332063	0.0944852	0.0504728	0	0.0378458	0.899099	0.0533976	0.0354405	NA	NA	NA
2732	ENSG00000104870	2032.11	2.81955	7.05941	1.26416	2.23037	0.0257228	0.170692	0.195129	8.43803	6.01827	0.189093	20.4115	10.8853	47.2861	protein_coding	KNOWN	FCGRT
15121	ENSG00000204219	367.574	2.81721	7.04798	1.21613	2.31654	0.0205287	0.147238	0.665079	2.08376	0.0536536	0.386124	7.96425	8.5393	0.369993	protein_coding	KNOWN	TCEA3
17955	ENSG00000229243	4.61964	2.81392	7.03193	2.29815	1.22443	0.220791	0.550615	0.0278153	0	0	0.0222827	0.254881	0.00785979	0	lincRNA	NOVEL	AC098973.1
10880	ENSG00000168497	58.5288	2.81214	7.02326	1.38806	2.02595	0.0427698	0.230382	0.292848	0.182509	0	0.0781998	1.19552	1.68259	0.0457686	protein_coding	KNOWN	SDPR
856	ENSG00000065361	8200.11	2.80976	7.0117	0.330721	8.49587	1.96457e-17	8.20591e-15	7.26602	7.96379	7.4133	6.38705	38.781	43.2271	70.6639	protein_coding	KNOWN	ERBB3
5078	ENSG00000125207	29.2709	2.80264	6.97718	1.88947	1.48329	0.137997	0.439739	0	0.163434	0	0.00597792	0.0262994	0.666317	0.201528	protein_coding	KNOWN	PIWIL1
16232	ENSG00000215458	146.495	2.80257	6.97684	0.771233	3.63389	0.000279185	0.00621522	0.161675	0.392961	0.167672	0.200752	3.48149	0.749231	0.612494	antisense	NOVEL	AP001053.11
19021	ENSG00000233922	117.623	2.7915	6.92348	0.944264	2.95627	0.00311386	0.0397031	0.350996	0.0679938	0.0276935	0.0880624	0.509768	1.76565	0.503474	lincRNA	NOVEL	AL133493.2
1659	ENSG00000088899	990.423	2.79087	6.92045	0.980749	2.84565	0.00443215	0.0511087	1.77222	0.745136	2.38872	0.783966	0.803051	6.65321	22.0735	protein_coding	KNOWN	LZTS3
18102	ENSG00000229950	24.0447	2.78982	6.91543	0.971517	2.87161	0.00408386	0.0482785	0.0776208	0.174149	0.167192	0.0186545	0.180552	0.710642	1.39751	antisense	NOVEL	TFAP2A-AS1
15223	ENSG00000204610	497.231	2.78843	6.90878	1.01547	2.74595	0.00603365	0.063653	2.45436	2.48549	0.0624892	1.12951	9.81688	4.83406	17.1468	protein_coding	KNOWN	TRIM15
7315	ENSG00000141854	564.837	2.78793	6.90637	0.394061	7.07486	1.49601e-12	2.94942e-10	1.82998	1.99385	2.0563	1.56878	9.09615	19.1547	10.3338	protein_coding	NOVEL	hsa-mir-1199
25342	ENSG00000275410	164.788	2.78761	6.90487	1.56025	1.78665	0.0739942	0.318298	0.700509	0.151799	0	0.0052941	2.2173	1.23621	0.991526	NA	NA	NA
19197	ENSG00000234690	65.7854	2.78689	6.9014	1.05153	2.65033	0.00804138	0.0777145	0.251428	0.136285	0	0.186608	1.26664	0.488967	1.22324	lincRNA	NOVEL	AC073283.4
17602	ENSG00000227765	18.0082	2.786	6.89714	0.907723	3.06922	0.0021462	0.030103	0.307815	0.287754	0.122782	0.369884	3.36304	0.391408	1.90507	pseudogene	KNOWN	RP11-162O12.2
6934	ENSG00000138798	120.632	2.78479	6.89137	1.22936	2.26524	0.0234979	0.16099	0.4973	0.0068703	0.0307806	0.0772729	1.3145	1.46459	0.38593	protein_coding	KNOWN	EGF
20949	ENSG00000248114	3.54043	2.78367	6.88604	2.18909	1.27161	0.203511	0.529353	0	0.144159	0	0	0.684793	0.0610049	0.0404896	pseudogene	KNOWN	AC114812.9
14948	ENSG00000201201	6.2125	2.78332	6.88435	1.45062	1.91871	0.0550207	0.267812	0.23879	0.0637793	0.285746	0	2.44058	0.13495	0.447839	misc_RNA	KNOWN	RN7SKP118
15426	ENSG00000205890	28.3969	2.78122	6.87433	0.781676	3.55802	0.000373662	0.00785711	0.120136	0.0550073	0.0102686	0.103115	0.707687	0.320071	0.463494	antisense	NOVEL	RP11-473M20.5
15467	ENSG00000206531	4.23409	2.77947	6.86602	2.06036	1.34902	0.17733	0.496153	0	0.0738497	0	0	0.146169	0.0130215	0.24199	protein_coding	KNOWN	CD200R1L
20742	ENSG00000244541	2.56121	2.7772	6.85521	1.90164	1.46042	0.144174	0.449351	0.129393	0	0	0	0.228015	0.109689	0.33974	lincRNA	NOVEL	RP11-167H9.6
20429	ENSG00000242193	318.653	2.77712	6.85482	1.58834	1.74845	0.0803868	0.33356	1.21421	0.0874115	0.0113514	0.484451	0.0150445	1.73293	7.49342	pseudogene	KNOWN	RP11-568K15.1
8825	ENSG00000156219	2.61126	2.77683	6.85345	1.4297	1.94225	0.0521072	0.260321	0	0.00642074	0.0095888	0.00962886	0.0254169	0.0747208	0.0270507	protein_coding	KNOWN	ART3
14081	ENSG00000189045	34.548	2.77678	6.85322	1.39277	1.99372	0.0461829	0.241078	0.0799114	0.0192095	0	0.23046	1.21667	0.0745162	0.395657	protein_coding	KNOWN	ANKDD1B
25391	ENSG00000275812	4.11264	2.77626	6.85072	1.67799	1.65451	0.098024	0.37183	0.160164	0.128336	0	0.0962299	1.86277	0.0678865	0.090114	NA	NA	NA
13533	ENSG00000185630	1551.59	2.77549	6.84707	1.08008	2.56971	0.0101782	0.0912902	1.62924	0.0544776	0.13313	0.466418	6.77934	1.88726	3.05881	protein_coding	KNOWN	PBX1
16635	ENSG00000223519	5.30107	2.77193	6.83023	1.38737	1.99798	0.0457184	0.239863	0	0.0119893	0.0358098	0	0.0711904	0.044394	0.126278	pseudogene	KNOWN	RP11-439E19.8
15043	ENSG00000203727	1467.72	2.77177	6.82947	1.08237	2.56083	0.0104422	0.0930021	3.37064	0.0499537	1.8352	2.02265	5.33032	22.9468	8.99817	protein_coding	KNOWN	SAMD5
87	ENSG00000005379	197.767	2.76687	6.80628	1.79607	1.54051	0.123436	0.416992	0.0185076	0.500505	0	0.0277994	0.173668	2.57694	0.0442554	protein_coding	KNOWN	BZRAP1
5542	ENSG00000129521	949.439	2.76512	6.79803	1.47913	1.86943	0.0615636	0.286313	2.09164	1.64453	0	0.321682	12.7332	2.50233	5.45842	protein_coding	KNOWN	EGLN3
24460	ENSG00000270149	4.41564	2.76354	6.79059	1.15416	2.39441	0.0166473	0.127885	0.0124252	0.00995609	0.0148685	0.0298613	0.197059	0.0526651	0.0838904	protein_coding	NOVEL	F11R
5864	ENSG00000132016	232.354	2.76334	6.78967	0.814849	3.39123	0.000695791	0.0126734	0.300975	1.00303	0.515683	0.0821964	3.1316	4.6969	1.87813	protein_coding	KNOWN	C19orf57
25417	ENSG00000276107	4.1108	2.76309	6.78846	1.3031	2.12039	0.033973	0.201403	0.0716695	0.0574275	0	0.0430606	0.0757767	0.303776	0.52421	NA	NA	NA
8711	ENSG00000154874	12.6244	2.76214	6.78401	1.58805	1.73932	0.0819779	0.337011	0.00796046	0.0191357	0.00317528	0.00956563	0.193583	0.011247	0	pseudogene	KNOWN	CCDC144B
11436	ENSG00000171596	2.64358	2.75949	6.77156	2.88996	0.954853	0.339652	0.671727	0.015929	0	0	0.00957047	0	0.12828	0	protein_coding	KNOWN	NMUR1
7956	ENSG00000146966	45.2314	2.75734	6.7615	1.26086	2.18688	0.0287512	0.182419	0.183684	0.00817683	0	0.0858368	0.496317	0.354677	0.556928	protein_coding	KNOWN	DENND2A
11642	ENSG00000172818	577.073	2.75656	6.75783	1.61218	1.70984	0.0872962	0.347937	2.69561	0.0273411	0	2.0173	12.0498	6.3983	5.57513	protein_coding	KNOWN	OVOL1
21063	ENSG00000248725	20.9184	2.75454	6.74836	1.76587	1.55988	0.118789	0.409202	0.486424	0.0556803	0	0.334004	0	1.03087	3.40144	pseudogene	KNOWN	RP11-218C23.1
15531	ENSG00000207730	7.90037	2.75183	6.7357	1.48074	1.85842	0.0631094	0.290758	0	2.21549	0	0.332246	2.33871	5.15652	5.91148	miRNA	KNOWN	MIR200B
9262	ENSG00000160284	194.317	2.75001	6.72722	2.28034	1.20596	0.227831	0.558805	0.0562942	2.57113	0	0.0135291	5.95203	0	7.38618	protein_coding	KNOWN	SPATC1L
5435	ENSG00000128573	144.263	2.7487	6.72112	1.55209	1.77096	0.0765666	0.324224	0.182138	0	0.0136221	0.0879367	0.036108	0.354294	1.03941	protein_coding	KNOWN	FOXP2
6037	ENSG00000133216	7793.32	2.74761	6.71603	0.496021	5.5393	3.03685e-08	2.45378e-06	5.78392	3.56672	6.07747	4.36027	15.4083	47.6594	36.6019	protein_coding	KNOWN	EPHB2
22814	ENSG00000259370	23.0382	2.74622	6.70955	0.565677	4.85474	1.20544e-06	6.3206e-05	0.0246204	0.0172619	0.0147309	0.0295849	0.188727	0.114791	0.128134	antisense	NOVEL	RP11-1069G10.1
4748	ENSG00000122035	795.449	2.74404	6.69944	0.689084	3.98215	6.82935e-05	0.00195473	3.55832	3.58994	5.84513	2.60437	22.5734	7.1846	48.6132	protein_coding	KNOWN	RASL11A
15290	ENSG00000204950	20.3386	2.74108	6.6857	1.9197	1.42787	0.153329	0.463392	0	0.275064	0	0.0142242	0.20025	0.0301038	1.23877	protein_coding	KNOWN	LRRC10B
14596	ENSG00000197935	22.5851	2.74039	6.68251	1.50203	1.82446	0.068082	0.303732	0.00827043	0.205435	0.00989675	0	0.288565	0.126197	0.725905	protein_coding	KNOWN	ZNF311
26205	ENSG00000283511	11.6557	2.73715	6.66753	1.01344	2.70084	0.00691642	0.0704331	0.0791648	0.101493	0.0189464	0.0190256	0.736574	0.161062	0.231613	NA	NA	NA
25618	ENSG00000278215	3.18522	2.73613	6.66279	1.84074	1.48643	0.137166	0.43823	0.217082	0.347887	0	0.260855	3.67235	0.552069	0	NA	NA	NA
2303	ENSG00000101342	248.294	2.73437	6.6547	1.28793	2.12308	0.033747	0.200545	0.0925977	2.77002	0.209301	0.0370898	6.64661	3.18346	5.71929	protein_coding	KNOWN	TLDC2
21999	ENSG00000254731	3.27063	2.72773	6.62415	1.44681	1.88534	0.0593841	0.280572	0	0.0974406	0.145519	0	0.385725	0.618522	0.20526	lincRNA	NOVEL	CTD-2005H7.1
24513	ENSG00000270470	6.65922	2.72658	6.61885	2.57995	1.05683	0.290587	0.629629	0	0.196336	0	0	0.725393	0.270026	0	pseudogene	KNOWN	RP11-601H16.1
17069	ENSG00000225431	7.6586	2.72658	6.61883	2.20442	1.23687	0.216135	0.543803	0.0295965	0.106718	0	0	0.641498	0	0.0499561	lincRNA	NOVEL	AP001626.1
13239	ENSG00000183960	66.518	2.72608	6.61655	2.40392	1.13401	0.256789	0.592394	0	0.332071	0.0153377	0	0	0.257147	1.47114	protein_coding	KNOWN	KCNH8
21016	ENSG00000248506	39.0231	2.72487	6.611	0.883988	3.08247	0.0020529	0.0291091	0.498132	0.0307034	0.137558	0.253244	0.850789	2.03016	1.66004	pseudogene	KNOWN	RP11-93I21.2
7528	ENSG00000143507	394.686	2.72472	6.6103	0.601339	4.53108	5.86825e-06	0.000246367	1.61351	0.556154	1.01394	1.18065	11.2652	7.25161	3.10383	protein_coding	KNOWN	DUSP10
23701	ENSG00000264575	48.7569	2.71991	6.58834	1.66556	1.63304	0.102461	0.380165	0	0.303079	0.536441	0	0.592473	0.451274	3.1055	lincRNA	KNOWN	LINC00526
4767	ENSG00000122378	1671.45	2.71835	6.58118	0.706745	3.84629	0.00011992	0.00310757	0.862134	3.48957	3.05161	0.881064	16.7357	17.4207	6.74108	protein_coding	KNOWN	FAM213A
21750	ENSG00000253522	7.36709	2.71731	6.57647	1.93016	1.40782	0.159185	0.470887	0	0.100617	0	0	0.0603481	0.106447	0.346827	lincRNA	NOVEL	MIR146A
23906	ENSG00000266555	2.92619	2.71392	6.561	1.77209	1.53148	0.125651	0.419878	0.320328	0.770018	0	0	4.40291	0.271546	1.08137	miRNA	KNOWN	MIR3145
11986	ENSG00000175147	58.801	2.71385	6.56068	0.810276	3.34929	0.000810202	0.0142415	0.0665921	0.115611	0.00885411	0.0755743	0.477212	0.216396	0.628615	processed_transcript	KNOWN	TMEM51-AS1
18246	ENSG00000230587	8.25122	2.71374	6.56021	1.50335	1.80513	0.0710537	0.311187	0.165548	0.110542	0	0	0.23338	1.02914	0.124191	lincRNA	NOVEL	AC093609.1
9496	ENSG00000162415	524.881	2.71357	6.55943	0.825481	3.28726	0.00101167	0.0167102	0.868901	1.40987	0.0987776	0.433305	4.52458	6.20568	3.11413	protein_coding	KNOWN	ZSWIM5
22533	ENSG00000258091	4.10069	2.71309	6.55726	1.25909	2.1548	0.0311771	0.19146	0.103007	0.165076	0	0.247556	1.52475	0.349283	0.695468	pseudogene	KNOWN	RP11-290L1.6
24284	ENSG00000268970	15.2733	2.71213	6.55291	1.17422	2.30972	0.0209034	0.148925	0.0407871	0.424865	0	0.294069	0.560618	1.21015	2.01945	sense_intronic	NOVEL	CTD-3099C6.11
4874	ENSG00000123384	3243.81	2.71047	6.54536	0.979782	2.7664	0.00566784	0.0609683	0.451247	1.30592	3.03174	0.265061	17.673	3.47267	3.66365	protein_coding	KNOWN	LRP1
8250	ENSG00000149922	43.0476	2.71016	6.54393	0.916659	2.95656	0.00311092	0.0397031	0.125599	0.060384	0.190376	0.0704316	1.54929	0.127766	0.508798	protein_coding	KNOWN	TBX6
25047	ENSG00000273084	24.4527	2.70795	6.53392	0.697935	3.87994	0.000104481	0.0027866	0.306726	0.29046	0.0333674	0.201041	1.09084	1.39463	1.66299	lincRNA	NOVEL	RP11-1275H24.3
17599	ENSG00000227744	4.76497	2.70311	6.51203	2.60239	1.0387	0.298943	0.637638	0	0	0	0.0452327	0.0955191	0.121258	0	lincRNA	NOVEL	AC114788.2
20521	ENSG00000242866	3.25856	2.70222	6.50805	1.92899	1.40085	0.16126	0.473782	0.0127093	0	0	0	0.0369534	0.00808036	0.0178767	protein_coding	KNOWN	STRC
14175	ENSG00000196187	2989.62	2.70007	6.49832	0.637303	4.2367	2.26825e-05	0.000787307	1.34142	3.88006	2.96414	1.25777	7.56422	13.7641	24.7031	protein_coding	KNOWN	TMEM63A
17082	ENSG00000225492	7.91983	2.70004	6.49821	1.1681	2.31148	0.0208062	0.148389	0.0111679	0.0447431	0.0534559	0	0.129887	0.331351	0.0754015	pseudogene	KNOWN	GBP1P1
6420	ENSG00000135905	10.3891	2.69701	6.48458	1.22905	2.19438	0.028208	0.180561	0.0118694	0.0152171	0	0.00285254	0.0953766	0.0120742	0.04274	protein_coding	KNOWN	DOCK10
19868	ENSG00000237707	2.30492	2.69564	6.47842	1.71218	1.57439	0.115398	0.403822	0	0.0741098	0.0553382	0	0.0488947	0.392021	0.208151	antisense	NOVEL	RP5-1018K9.1
2399	ENSG00000102048	341.646	2.6951	6.47599	1.12478	2.39611	0.0165701	0.127451	2.01198	1.74577	0.0133018	0.961729	11.7177	3.88232	7.40498	protein_coding	KNOWN	ASB9
5480	ENSG00000128917	460.706	2.69376	6.46996	0.855792	3.14768	0.00164574	0.0245654	0.652113	0.296688	1.64005	0.591025	1.12187	9.90364	4.39039	protein_coding	KNOWN	DLL4
1171	ENSG00000074416	1147.01	2.6935	6.46881	0.849048	3.17238	0.00151197	0.0230778	1.04527	0.545868	1.97267	0.159348	2.82615	9.41412	5.8196	protein_coding	KNOWN	MGLL
21827	ENSG00000253898	3.70975	2.69151	6.45991	1.44362	1.86443	0.0622618	0.288274	0	0.0553509	0	0.0207517	0.182592	0.0731978	0.13603	lincRNA	NOVEL	RP11-51M18.1
4437	ENSG00000119042	2991.57	2.68931	6.45004	0.513772	5.23444	1.65487e-07	1.09044e-05	1.80258	2.04556	2.6877	2.43682	24.7207	7.17503	11.5068	protein_coding	KNOWN	SATB2
3212	ENSG00000108352	796.598	2.68657	6.43779	0.685248	3.92057	8.83394e-05	0.00242432	1.08104	0.954679	1.90464	0.652274	13.4338	2.43336	6.30488	protein_coding	KNOWN	RAPGEFL1
7455	ENSG00000143184	5.59076	2.68369	6.42496	3.53752	0.758636	0.44807	0.758657	0.134505	0	0	0	0.650117	0	0	protein_coding	KNOWN	XCL1
9759	ENSG00000163545	508.875	2.68215	6.41813	0.665985	4.02735	5.64095e-05	0.00167086	1.6412	1.76158	0.913458	0.559537	3.03468	7.34461	13.1166	protein_coding	KNOWN	NUAK2
8591	ENSG00000153714	425.928	2.68105	6.41324	1.09923	2.43903	0.0147266	0.117811	1.58932	0.0691042	0.501262	4.44138	6.9691	14.8306	9.9264	protein_coding	KNOWN	LURAP1L
24879	ENSG00000272444	5.74229	2.68083	6.41226	1.09437	2.44966	0.014299	0.115234	0.162141	0.0324802	0	0.0974179	0.471441	0.343623	0.592972	lincRNA	NOVEL	RP11-1017G21.6
18440	ENSG00000231437	3.85222	2.67862	6.40242	2.28071	1.17446	0.240209	0.574295	0	0.0175882	0	0.0175841	0.162456	0	0.00823325	lincRNA	NOVEL	RP11-88H9.2
21072	ENSG00000248780	2.99112	2.67719	6.39607	1.63024	1.6422	0.100548	0.376297	0.0874106	0.0700405	0	0	0.0462099	0.259347	0.491803	pseudogene	KNOWN	RP11-632F7.1
16701	ENSG00000223861	4.33687	2.67477	6.38536	1.39542	1.91682	0.0552607	0.268344	0.106129	0	0.0634992	0.127529	1.0099	0.13495	0.238848	pseudogene	KNOWN	RP11-74C1.2
24610	ENSG00000271070	16.623	2.67474	6.38525	1.57717	1.69591	0.0899026	0.353766	0.095748	0.562622	0	0	0.303705	0.86578	2.04711	pseudogene	KNOWN	RP11-465O11.2
17267	ENSG00000226308	7.81157	2.67391	6.38157	1.99874	1.3378	0.180962	0.500294	0	0.195333	0	0	0.128873	0.103326	0.731505	lincRNA	NOVEL	RP4-813D12.3
22332	ENSG00000256847	26.6261	2.67302	6.37762	1.50371	1.77761	0.0754679	0.321659	0	0.474154	0.629429	0	1.49462	0.724576	3.07042	pseudogene	KNOWN	CTD-3110P2.2
895	ENSG00000066230	84.5719	2.67202	6.37323	0.84229	3.17233	0.00151219	0.0230778	0.188767	0.620147	0.0564716	0.136098	1.13763	1.24816	2.44276	protein_coding	KNOWN	SLC9A3
19377	ENSG00000235419	4.30995	2.67146	6.37075	1.45468	1.83646	0.0662891	0.299111	0	0.030415	0.0908442	0.0912237	0.682264	0.257419	0.042713	antisense	NOVEL	AC010149.4
13741	ENSG00000186854	3860.33	2.67115	6.36936	1.00264	2.66412	0.00771905	0.0756375	0.503117	4.97924	8.48605	0.64775	12.447	30.9135	26.4604	protein_coding	KNOWN	TRABD2A
15177	ENSG00000204420	21.1404	2.66696	6.35091	1.11871	2.38396	0.0171274	0.130476	0.0357737	0.0644959	0.0749147	0.0644809	0.917229	0.0227444	0.201276	protein_coding	KNOWN	C6orf25
19312	ENSG00000235192	3.30556	2.66392	6.33751	1.67325	1.59207	0.11137	0.397365	0.101156	0	0	0.0405178	0.463464	0.0571676	0.151771	lincRNA	NOVEL	AC009495.2
11901	ENSG00000174576	3.15279	2.66243	6.331	2.84231	0.936715	0.348905	0.679985	0	0.0122796	0.0183384	0	0.145828	0	0	protein_coding	KNOWN	NPAS4
16414	ENSG00000219159	11.7087	2.6618	6.32823	1.88391	1.41291	0.157682	0.468973	0.0077301	0.105298	0	0	0.474039	0.0131058	0.0608893	lincRNA	NOVEL	AC011298.2
8184	ENSG00000149260	1448.38	2.65932	6.31736	0.409393	6.49577	8.26092e-11	1.20463e-08	2.09164	2.40988	2.11552	1.23367	16.6291	8.61998	11.9648	protein_coding	KNOWN	CAPN5
18907	ENSG00000233446	9.21578	2.65369	6.29274	2.12755	1.2473	0.212288	0.540011	0.148881	0	0.101804	0	0.989454	0	0.191465	pseudogene	KNOWN	XXyac-YR12DB5.1
10308	ENSG00000165863	40.3539	2.65235	6.2869	1.2621	2.10154	0.0355937	0.207246	0.0762622	0.288078	0.117333	0.0785485	0.0230379	2.34582	0.281966	protein_coding	KNOWN	C10orf82
22820	ENSG00000259402	3.25728	2.65006	6.27693	1.48339	1.78649	0.0740207	0.318298	0.049937	0.0400136	0.119514	0	0.739183	0.126997	0.112385	sense_intronic	NOVEL	RP11-30K9.4
22376	ENSG00000257138	5.20806	2.64917	6.27308	1.89063	1.40121	0.16115	0.473629	0	0.147312	0	0	0.364464	0.077924	0.284454	protein_coding	KNOWN	TAS2R38
17195	ENSG00000225969	54.7399	2.64853	6.27029	0.598002	4.42897	9.4684e-06	0.000370969	0.847319	1.13157	0.675959	0.622218	7.41587	2.19475	5.93266	antisense	KNOWN	LINC00035
25520	ENSG00000277246	2.88682	2.64848	6.27008	2.06634	1.28173	0.199939	0.525185	0	0.152148	0	0.0760564	0	0.536549	0.569781	NA	NA	NA
15000	ENSG00000203288	27.0207	2.64838	6.26962	1.60425	1.65085	0.0987696	0.3731	0.0230209	0.73785	0.0275478	0	1.94722	0.175636	1.632	antisense	NOVEL	RP11-98D18.9
25711	ENSG00000278973	5.34565	2.64559	6.25754	1.76697	1.49725	0.134329	0.434188	0.0336755	0.188885	0	0	0.854528	0.19983	0.0378941	NA	NA	NA
24388	ENSG00000269895	3.72775	2.64501	6.25501	1.37104	1.9292	0.0537066	0.265133	0.022036	0.0529711	0.0263692	0	0.349482	0.0747208	0.0743894	lincRNA	NOVEL	AP000654.4
18801	ENSG00000232934	67.4393	2.64436	6.2522	1.31506	2.01084	0.0443427	0.235546	0.262753	0.0543328	0	0.417586	2.40172	0.294591	0.743942	antisense	NOVEL	RP11-324O2.3
7944	ENSG00000146839	4.01517	2.64414	6.25123	1.23071	2.14847	0.0316764	0.193035	0.00594475	0.00238171	0	0.00714347	0.0314272	0.0302367	0.0100342	polymorphic_pseudogene	KNOWN	ZAN
8600	ENSG00000153823	5.27976	2.64401	6.25065	1.37668	1.92056	0.0547871	0.267192	0.0234247	0.0187698	0	0.0093827	0.0165114	0.0397148	0.1933	protein_coding	KNOWN	PID1
22436	ENSG00000257542	2.98622	2.64362	6.24898	1.9557	1.35175	0.176455	0.495066	0.0163555	0.0262107	0.0195717	0	0.0172928	0.277295	0	pseudogene	KNOWN	OR7E47P
6798	ENSG00000138061	184.296	2.64345	6.24825	1.13177	2.33568	0.0195082	0.142085	0.55478	0.112009	0.00522736	0.362194	1.73201	2.45516	0.658688	protein_coding	KNOWN	CYP1B1
768	ENSG00000061656	223.306	2.64235	6.24347	0.920375	2.87095	0.00409243	0.0482785	0.856019	1.35303	0.64548	0.507269	12.5967	0.765421	2.40154	protein_coding	KNOWN	SPAG4
23565	ENSG00000263155	95.6893	2.64156	6.24004	1.32216	1.99791	0.0457261	0.239863	0.625646	0.0821834	0	0.554609	3.81718	0.565147	1.52346	protein_coding	KNOWN	MYZAP
24833	ENSG00000272235	37.1556	2.64123	6.23865	1.02568	2.57511	0.0100209	0.0902978	0.0531257	0.206762	0.0908179	0.00911974	0.842554	0.720566	0.136642	lincRNA	NOVEL	RP11-22L13.1
6195	ENSG00000134538	40.6056	2.63967	6.23188	1.74914	1.50912	0.131267	0.429665	0.164978	0	0.155116	0.297367	2.06827	0.809156	0	protein_coding	KNOWN	SLCO1B1
3618	ENSG00000111859	2228.26	2.63916	6.22967	1.6877	1.56376	0.117874	0.407611	0.162282	7.06652	0.0182057	0.0274226	24.4022	2.74278	6.84793	protein_coding	KNOWN	NEDD9
10507	ENSG00000166819	16.9735	2.63677	6.21936	0.640362	4.11762	3.82807e-05	0.00121728	0.0276712	0.055431	0.0331125	0.0332509	0.321827	0.222844	0.163472	protein_coding	KNOWN	PLIN1
6957	ENSG00000139155	6.90765	2.63676	6.21933	1.79974	1.46507	0.142901	0.447514	0.0162141	0	0.012935	0.0194836	0.20572	0.0183266	0	protein_coding	KNOWN	SLCO1C1
676	ENSG00000054356	19.0162	2.63621	6.21697	0.610405	4.31879	1.56887e-05	0.000573637	0.0190777	0.0305733	0.0190244	0.00764155	0.12775	0.115903	0.12165	protein_coding	KNOWN	PTPRN
20091	ENSG00000239508	4.71076	2.63603	6.21618	1.20073	2.19535	0.0281383	0.180395	0.0803268	0.0160911	0	0.024131	0.276023	0.136188	0.158182	antisense	NOVEL	PLCH1-AS1
9236	ENSG00000160183	72.7747	2.6347	6.21048	2.20085	1.19713	0.231256	0.563559	0	0.435074	0	0	0.284591	1.2353	0.511771	protein_coding	KNOWN	TMPRSS3
2103	ENSG00000100365	15.1528	2.63431	6.20877	1.124	2.34368	0.0190945	0.140174	0.0895971	0.143585	0	0.0538318	0.852585	0.126588	0.386481	protein_coding	KNOWN	NCF4
25389	ENSG00000275799	8.83161	2.63366	6.20599	0.949857	2.77269	0.00555949	0.0601441	0.175502	0.140627	0.0700046	0.281188	1.11336	0.347144	1.64573	NA	NA	NA
14110	ENSG00000189212	3.89913	2.63342	6.20496	1.05854	2.48778	0.0128542	0.106803	0.0031754	0.00508877	0.00379982	0.00381569	0.0235016	0.0296101	0.0214391	pseudogene	KNOWN	DPY19L2P1
10151	ENSG00000165029	661.589	2.63244	6.20076	1.47621	1.78324	0.0745473	0.31967	1.18953	0.713935	0.00276935	0.0723038	6.9932	0.317817	1.89324	protein_coding	KNOWN	ABCA1
10826	ENSG00000168237	495.777	2.6243	6.16586	0.689659	3.80522	0.00014168	0.00355196	0.636403	2.54969	1.89865	0.523787	5.83465	8.19577	11.9289	protein_coding	KNOWN	GLYCTK
14666	ENSG00000198223	109.027	2.62402	6.16466	1.64448	1.59566	0.110566	0.395987	0.22632	0.00549534	0.287238	0.45326	1.64603	2.84294	0	protein_coding	KNOWN	CSF2RA
12998	ENSG00000182575	213.125	2.62314	6.16091	1.61379	1.62545	0.104066	0.383045	0.0325546	1.22601	0.0111303	0.0167653	0.575309	5.10543	0.272129	protein_coding	KNOWN	NXPH3
7252	ENSG00000141434	10.3131	2.62289	6.15982	0.990294	2.64859	0.00808274	0.0779613	0.0508457	0.024445	0.0121688	0.0488787	0.0537595	0.198272	0.37762	protein_coding	KNOWN	MEP1B
1519	ENSG00000085276	1654	2.62202	6.15612	1.19377	2.19643	0.0280615	0.18009	1.58415	0.0739876	4.3507	0.19764	11.1784	4.00181	13.4718	protein_coding	KNOWN	MECOM
24895	ENSG00000272502	22.9003	2.62097	6.15162	1.59336	1.64493	0.0999848	0.375628	0	0.405817	0	0.276629	0.316423	0.468364	2.38324	antisense	NOVEL	RP11-713M15.2
4161	ENSG00000116329	40.6803	2.6172	6.13559	1.1994	2.1821	0.0291024	0.184039	0.0196756	0.101351	0.00672704	0.0202654	0.0148594	0.390771	0.281499	protein_coding	KNOWN	OPRD1
25139	ENSG00000273478	19.6981	2.61705	6.13495	0.948142	2.76019	0.00577678	0.0617627	0.43978	0.0640705	0.191367	0.336292	1.47949	0.406699	2.83427	antisense	NOVEL	RP11-465N4.5
21877	ENSG00000254154	7.67348	2.61259	6.11599	1.39389	1.87432	0.0608867	0.284087	0.0100498	0	0.0120261	0.0120763	0.00354192	0.0482764	0.101779	processed_transcript	NOVEL	RP4-798P15.3
5532	ENSG00000129467	16.2553	2.60711	6.09282	0.867416	3.0056	0.00265053	0.0350428	0.0227926	0.0260905	0.0155855	0.00391266	0.185905	0.0883274	0.0439678	protein_coding	KNOWN	ADCY4
7401	ENSG00000142677	358.254	2.60256	6.07365	0.363597	7.15783	8.19637e-13	1.68326e-10	0.844896	1.58719	1.14584	0.834772	6.38224	6.40628	7.36294	protein_coding	KNOWN	IL22RA1
24179	ENSG00000267968	11.1282	2.60186	6.07069	2.16475	1.20192	0.229395	0.561335	0	0.966452	0	0	0.141695	0.56803	3.77007	antisense	NOVEL	AC011523.2
20412	ENSG00000242094	19.5352	2.59965	6.06141	0.906426	2.86803	0.0041304	0.0485869	0.0222664	0.0118944	0.115461	0.0445937	0.463	0.201339	0.200446	sense_intronic	NOVEL	FOXP1-IT1
19990	ENSG00000238164	124.796	2.59902	6.05876	1.54553	1.68164	0.0926388	0.359654	0.00428008	0.661904	0.0307304	0.00514313	0.266997	1.15017	1.78202	processed_transcript	NOVEL	RP3-395M20.8
22353	ENSG00000257017	4.24039	2.59876	6.05766	1.35653	1.91574	0.0553988	0.268856	0.00485974	0	0.00581537	0.017519	0.0770736	0.0288376	0.0164056	protein_coding	KNOWN	HP
24381	ENSG00000269887	14.9893	2.59702	6.05037	0.99212	2.61765	0.0088537	0.0830254	0.404106	0.0588732	0.131883	0.132434	2.17516	0.747417	0.372051	sense_intronic	NOVEL	RP11-477H21.2
19240	ENSG00000234880	2.26749	2.59624	6.04708	2.40829	1.07804	0.281016	0.618888	0.0121888	0.00976667	0.0145857	0	0	0.165322	0	lincRNA	KNOWN	LINC00163
22371	ENSG00000257108	11.1099	2.59176	6.02834	0.89415	2.89857	0.00374864	0.0453756	0.0748699	0.0599919	0.0298642	0.0149945	0.488157	0.148093	0.196581	protein_coding	KNOWN	NHLRC4
20892	ENSG00000247095	141.873	2.59006	6.02124	0.974685	2.65733	0.00787621	0.076629	1.21092	0.154159	0.176052	0.584759	5.45632	0.604398	3.54026	lincRNA	KNOWN	MIR210HG
9692	ENSG00000163297	1542.65	2.58931	6.0181	0.960046	2.69707	0.00699532	0.0708058	1.10244	0.136559	2.43133	1.77272	4.98345	16.5985	2.97851	protein_coding	KNOWN	ANTXR2
4433	ENSG00000118997	25.0713	2.58764	6.01115	0.743772	3.47908	0.000503143	0.00988792	0.0110862	0.0148053	0.00884414	0.00592073	0.0260478	0.111731	0.0471277	protein_coding	KNOWN	DNAH7
22840	ENSG00000259459	3.79381	2.58614	6.00491	2.08114	1.24266	0.213994	0.541518	0.0588943	0	0	0	0.174354	0.0798808	0.0132544	lincRNA	NOVEL	RP11-321G12.1
15826	ENSG00000213659	2.60731	2.58608	6.00466	2.14445	1.20594	0.227839	0.558805	0	0	0.11293	0	0.0332601	0.346669	0.106194	pseudogene	KNOWN	RSU1P3
15540	ENSG00000207923	4.37691	2.58415	5.99662	1.17242	2.20412	0.0275162	0.178356	0.547227	0.657724	0	0.328785	4.05011	1.62362	1.53945	miRNA	KNOWN	MIR559
4077	ENSG00000115705	19.8192	2.58207	5.98799	1.63217	1.58199	0.113652	0.400982	0.00767925	0.0922987	0	0	0.198924	0.205059	0.0518475	protein_coding	KNOWN	TPO
22151	ENSG00000255552	4.38542	2.58168	5.98638	2.01408	1.28182	0.199906	0.525185	0	0.133451	0	0	0.427651	0.0403384	0.160638	protein_coding	KNOWN	LY6G6E
11447	ENSG00000171658	34.0706	2.57933	5.97664	1.5111	1.70693	0.0878353	0.349056	0.00999501	0.368406	0	0.0720626	1.47949	0.118621	0.438637	pseudogene	KNOWN	RP11-443P15.2
26074	ENSG00000280444	6.10632	2.57835	5.97257	2.76567	0.932271	0.351196	0.681476	0	0.352549	0	0	1.53515	0.0745956	0	NA	NA	NA
3457	ENSG00000110628	955.808	2.5782	5.97195	0.81744	3.154	0.00161051	0.0241861	2.83125	0.930415	0.277898	2.25623	4.43017	10.991	12.7771	protein_coding	KNOWN	SLC22A18
19193	ENSG00000234678	70.4837	2.57663	5.96545	0.93049	2.76911	0.00562095	0.0606227	1.06454	0.0793484	0.444374	0.743718	2.6699	1.19624	6.54664	antisense	NOVEL	RP11-465N4.4
9773	ENSG00000163606	4.30494	2.57605	5.96305	1.54744	1.66472	0.0959694	0.367019	0	0.0215592	0	0.0161656	0.0355598	0.0171064	0.121106	protein_coding	KNOWN	CD200R1
944	ENSG00000067646	559.554	2.57227	5.94744	0.828223	3.10577	0.00189785	0.0273512	0.679602	1.19573	0.978165	0.702424	6.884	0.559993	8.42281	protein_coding	KNOWN	ZFY
17897	ENSG00000228974	57.2312	2.57147	5.94413	1.82676	1.40766	0.159231	0.470909	0.0839197	0.60519	0.100422	5.64713	15.705	0	12.9373	pseudogene	KNOWN	AC006483.5
20655	ENSG00000243988	14.7259	2.57129	5.94339	1.05376	2.44011	0.0146826	0.117595	0.37258	0.0497569	0.222923	0.596944	0.459587	3.57953	1.39751	pseudogene	KNOWN	RPS24P17
6411	ENSG00000135838	135.361	2.57009	5.93848	2.28386	1.12533	0.26045	0.596074	0	0.956113	0	0	0.80944	1.89771	1.55659	protein_coding	KNOWN	NPL
19791	ENSG00000237330	243.752	2.56966	5.93671	1.09998	2.33609	0.0194864	0.142035	1.85056	0.354106	0.181784	2.12414	16.2223	1.6624	2.19116	protein_coding	KNOWN	RNF223
16038	ENSG00000214369	6.67629	2.56954	5.9362	2.20334	1.1662	0.243534	0.577692	0.132494	0.159247	0	0	0	0.0561583	1.26728	pseudogene	KNOWN	AC009967.3
3077	ENSG00000106927	5.68339	2.56765	5.92845	1.28586	1.99684	0.0458423	0.240225	0.0128696	0.0103122	0.0308007	0.046394	0.299357	0.120007	0.0144818	protein_coding	KNOWN	AMBP
18695	ENSG00000232562	2.34994	2.56667	5.92441	1.85184	1.38601	0.165744	0.480586	0	0.0286356	0.0427647	0.0429434	0.377853	0.12118	0	pseudogene	KNOWN	TPMTP3
17394	ENSG00000226840	4.49246	2.56643	5.92341	1.23639	2.07574	0.0379177	0.215621	0.0449775	0.0360397	0	0.0540469	0.285331	0.266896	0.050612	pseudogene	KNOWN	PAICSP3
14459	ENSG00000197329	1640.71	2.56172	5.90413	0.427723	5.98922	2.10848e-09	2.27901e-07	3.48951	4.62783	4.12237	1.81346	19.316	18.024	24.9142	protein_coding	KNOWN	PELI1
23366	ENSG00000261553	32.7126	2.56141	5.90283	0.855157	2.99525	0.00274222	0.0359656	0.0314347	0.115865	0.112849	0.0151093	0.684666	0.22384	0.318354	processed_transcript	NOVEL	RP11-29G8.3
22925	ENSG00000259770	26.0425	2.56054	5.89929	0.948541	2.69945	0.00694533	0.0705896	0.170091	0.467282	0.116307	0.087595	2.20944	1.29769	0.273426	pseudogene	KNOWN	RP11-81A1.3
8062	ENSG00000148082	135.077	2.55924	5.89396	1.00324	2.55098	0.0107421	0.0945796	0.193119	0.063593	0.123462	0.101725	0.268519	1.78511	0.0744219	protein_coding	KNOWN	SHC3
2689	ENSG00000104537	142.332	2.5588	5.89219	0.829198	3.08588	0.00202953	0.0288775	0.310565	0.32627	0.297308	0.389774	0.233502	1.81949	3.79757	protein_coding	KNOWN	ANXA13
8445	ENSG00000152154	2.33142	2.55876	5.89202	1.72981	1.47922	0.139083	0.44148	0.0212687	0	0.0127255	0	0.0449752	0.0901489	0.0119666	protein_coding	KNOWN	TMEM178A
6441	ENSG00000135968	4631.34	2.55636	5.8822	0.740405	3.45265	0.000555117	0.0106379	4.0581	5.26258	1.09333	1.94628	6.2248	20.4227	27.8884	protein_coding	KNOWN	GCC2
6233	ENSG00000134812	4.22502	2.55562	5.87921	1.52912	1.6713	0.0946628	0.3643	0	0.0349476	0	0.0262046	0.023057	0.166377	0.085887	protein_coding	KNOWN	GIF
13158	ENSG00000183560	3.84209	2.55364	5.87114	2.08977	1.22197	0.221719	0.551715	0.127047	0	0	0.0381661	0.402982	0.323097	0	protein_coding	KNOWN	FOLR4
21105	ENSG00000248958	12.7421	2.5519	5.86404	1.05785	2.41233	0.0158508	0.12393	0.0383039	0.0997496	0	0.0230138	0.232869	0.357178	0.140082	pseudogene	KNOWN	ZSWIM5P3
362	ENSG00000019505	333.5	2.55128	5.86152	1.26369	2.01892	0.0434959	0.232469	0.9637	0.547133	0.02318	0.651752	0.148487	7.43458	2.02717	protein_coding	KNOWN	SYT13
23056	ENSG00000260285	88.0839	2.55001	5.85638	0.844453	3.01972	0.0025301	0.0338317	0.181017	0.362614	0.201141	0.0233055	1.63366	0.542558	1.21489	antisense	NOVEL	RP11-600F24.7
20649	ENSG00000243955	9.17301	2.54986	5.85577	2.19011	1.16426	0.244319	0.578668	0.257771	0	0	0.0619498	0.218035	0	1.18926	protein_coding	KNOWN	GSTA1
9452	ENSG00000162069	466.385	2.54972	5.85521	0.917734	2.77828	0.00546479	0.0594064	1.60178	0.215408	0.134039	1.58827	6.72691	4.48184	4.32962	protein_coding	KNOWN	CCDC64B
10379	ENSG00000166183	41.357	2.54911	5.85273	0.685026	3.72119	0.000198288	0.00465392	0.0814809	0.0652892	0.0564495	0.0360725	0.661998	0.18177	0.212331	protein_coding	KNOWN	ASPG
4585	ENSG00000120324	107.364	2.54755	5.84641	1.92974	1.32015	0.186783	0.50734	0.00798385	0	1.13691	0.0191875	0.126621	4.46689	0.503104	protein_coding	KNOWN	PCDHB10
4133	ENSG00000116132	33.361	2.54678	5.84329	1.98775	1.28124	0.200111	0.525357	0.0222979	0.117411	0	0.00382772	0.575921	0.0567066	0	protein_coding	KNOWN	PRRX1
24682	ENSG00000271447	99.8884	2.54511	5.83654	1.50558	1.69046	0.0909404	0.355905	0.514856	0.147338	0	0.58553	3.8883	1.51978	0.051728	NA	NA	NA
22396	ENSG00000257283	3.25657	2.54135	5.82135	1.65857	1.53226	0.125458	0.419666	0.0486424	0	0.174623	0	0.20572	0.618522	0.109472	antisense	NOVEL	RP11-1060G2.1
10887	ENSG00000168539	13.8303	2.54103	5.82006	1.40121	1.81346	0.069761	0.307823	0.105067	0.0453324	0	0	0.187996	0.123324	0.354689	protein_coding	KNOWN	CHRM1
11241	ENSG00000170477	62.3906	2.54072	5.81878	1.9698	1.28984	0.197108	0.521249	0.00793082	0.654547	0.00949036	0	0.687596	2.2455	0.00892433	protein_coding	KNOWN	KRT4
13839	ENSG00000187653	3050.51	2.53895	5.81166	0.604973	4.1968	2.70713e-05	0.000912649	241.461	318.202	72.8759	176.287	764.043	1027.08	1735.13	pseudogene	KNOWN	TMSB4XP8
15621	ENSG00000212939	21.2325	2.53697	5.80371	2.18585	1.16063	0.245791	0.580549	0.0742002	0	0	0.121585	0.706072	0	0.144219	antisense	NOVEL	RP1-29C18.10
10023	ENSG00000164418	26.5005	2.53659	5.80216	1.71593	1.47826	0.139339	0.441997	0.0534242	0.0114154	0	0.0641968	0.222177	0.338153	0	protein_coding	KNOWN	GRIK2
23383	ENSG00000261613	4.51674	2.53577	5.79884	1.32037	1.92049	0.0547958	0.267192	0.0131269	0.0210367	0.0471246	0	0.222066	0.10015	0.0295426	antisense	NOVEL	RP11-20I23.13
22579	ENSG00000258404	15.4945	2.53506	5.796	1.12697	2.24944	0.0244842	0.164996	0.115713	0.74175	0	0.347615	3.05861	1.1771	1.10677	lincRNA	NOVEL	RP11-1029J19.5
23505	ENSG00000262539	6.19595	2.53379	5.79091	2.29953	1.10187	0.270516	0.607091	0	0.119586	0.0892957	0	0	0.021086	0.895678	pseudogene	KNOWN	RP11-259G18.3
6425	ENSG00000135917	9.54044	2.53217	5.7844	1.70774	1.48276	0.138138	0.440055	0	0.0513442	0.0117966	0	0.0833843	0.00835683	0.188582	protein_coding	KNOWN	SLC19A3
118	ENSG00000006210	25.3254	2.53176	5.78277	2.2215	1.13966	0.254426	0.589663	0	0.151267	0	0	0.538454	0.0186084	0.103745	protein_coding	KNOWN	CX3CL1
25015	ENSG00000272975	3.55986	2.53142	5.78141	3.56162	0.710751	0.477239	0.780123	0	0.0555334	0	0	0	0.244798	0	antisense	NOVEL	CTC-297N7.11
25334	ENSG00000275371	5.78717	2.53135	5.78112	1.27322	1.98815	0.0467948	0.242986	0.0742701	0.0595113	0.029625	0.0297487	0.706738	0.0629598	0.0835741	NA	NA	NA
20919	ENSG00000247675	42.2324	2.5292	5.77252	0.808634	3.12775	0.00176152	0.025886	0.26039	0.156485	0.389493	0.136892	1.27332	0.331105	2.47227	antisense	NOVEL	LRP4-AS1
21478	ENSG00000251087	7.54962	2.52761	5.76615	1.247	2.02695	0.0426671	0.230085	0.206015	0.0275126	0	0.123778	0.508249	0.873207	0.154548	pseudogene	KNOWN	ALG1L3P
20007	ENSG00000238243	4.13382	2.52626	5.76075	3.55091	0.71144	0.476812	0.77982	0	0.155905	0	0	0	0.683319	0	protein_coding	KNOWN	OR2W3
14826	ENSG00000198835	72.1153	2.52478	5.75484	1.23573	2.04315	0.0410374	0.22529	0.38645	0.337806	0.0980939	0.337727	0.35907	4.59631	0.0527104	protein_coding	KNOWN	GJC2
5604	ENSG00000130222	76.8355	2.52385	5.75117	0.735089	3.4334	0.000596058	0.0112303	0.278167	0.955242	0.737061	0.119377	2.62596	2.74545	3.68908	protein_coding	KNOWN	GADD45G
26235	ENSG00000284048	148.846	2.52371	5.75059	0.480527	5.25196	1.50485e-07	1.01051e-05	1.40802	0.713244	0.600366	0.583427	5.23616	3.55336	5.4999	NA	NA	NA
4687	ENSG00000121316	1910.25	2.52208	5.74409	1.56029	1.61641	0.106005	0.386448	0.0277369	5.2229	18.9522	0.0999897	58.9462	14.4213	31.326	protein_coding	KNOWN	PLBD1
5935	ENSG00000132561	623.678	2.51946	5.73369	1.04895	2.4019	0.0163101	0.12616	1.13281	0.789307	0.0770728	1.25653	5.79238	0.510662	7.6995	protein_coding	KNOWN	MATN2
23524	ENSG00000262768	11.0289	2.51789	5.72743	0.857052	2.93785	0.00330502	0.0413866	0.25964	0.138696	0.207131	0.051999	0.411779	1.39397	1.02258	antisense	NOVEL	RP11-353N14.1
6512	ENSG00000136379	2391.18	2.51778	5.727	0.508058	4.9557	7.20717e-07	4.00933e-05	8.41525	3.47014	5.65899	6.34401	44.2655	40.8378	17.4883	protein_coding	KNOWN	ABHD17C
21074	ENSG00000248787	4.30707	2.5175	5.72589	1.15493	2.17979	0.029273	0.184651	0.0615149	0.147872	0	0.147838	0.780483	0.312882	0.484547	lincRNA	NOVEL	RP11-666A20.4
12	ENSG00000001617	1551.52	2.51657	5.72221	0.7995	3.14768	0.0016457	0.0245654	4.09842	0.789378	4.51356	2.2564	19.4912	26.0825	4.44647	protein_coding	KNOWN	SEMA3F
523	ENSG00000039987	6.03386	2.51608	5.72026	1.08331	2.32259	0.0202011	0.145518	0.019854	0.0159087	0	0.0477149	0.0629755	0.134644	0.156388	protein_coding	KNOWN	BEST2
6759	ENSG00000137834	568.358	2.5135	5.71004	0.648593	3.87531	0.000106488	0.00282487	1.10736	0.255624	0.590981	0.457067	1.59894	4.33998	4.38373	protein_coding	KNOWN	SMAD6
13584	ENSG00000185885	857.15	2.51325	5.70904	1.31674	1.9087	0.0563013	0.271418	9.09612	9.6856	9.54604	0.496831	0.591444	25.7717	97.0741	protein_coding	KNOWN	IFITM1
24432	ENSG00000270021	10.8898	2.51203	5.70424	0.931184	2.69768	0.00698246	0.0707755	0.0911592	0.0417396	0.0467507	0.0156487	0.399302	0.353266	0.0879248	antisense	NOVEL	CTC-203F4.2
10246	ENSG00000165556	2773.02	2.5119	5.7037	0.520749	4.82363	1.40972e-06	7.23772e-05	4.81113	9.36962	5.42169	4.84707	46.7518	16.2004	41.6614	protein_coding	KNOWN	CDX2
24763	ENSG00000271969	14.7904	2.51166	5.70274	0.990632	2.53541	0.0112316	0.0971264	0.66575	0.33947	0	0.21818	2.68763	1.12873	1.4983	antisense	KNOWN	U47924.29
22384	ENSG00000257220	44.5206	2.51097	5.70002	0.956371	2.62552	0.00865176	0.0816984	0.0393217	1.19729	0.611702	0.567007	5.94524	2.70001	1.72566	pseudogene	KNOWN	RP11-136F16.2
20612	ENSG00000243708	10.5509	2.50804	5.68845	1.03647	2.41978	0.01553	0.122432	0.0236319	0.0331377	0.00706975	0.0212978	0.268602	0.0350579	0.0664808	protein_coding	KNOWN	PLA2G4B
11778	ENSG00000173641	6.62055	2.50649	5.68238	1.39743	1.79364	0.07287	0.316163	0.0268715	0.0107658	0.0160778	0.00807248	0.14916	0.113897	0	protein_coding	KNOWN	HSPB7
20760	ENSG00000244642	19.3227	2.50466	5.67515	1.18867	2.1071	0.0351086	0.20539	0.938103	0.451011	0	1.12726	1.58698	1.11334	8.02272	misc_RNA	KNOWN	RN7SL396P
5026	ENSG00000124602	57.6796	2.50208	5.66503	0.90314	2.77043	0.00559826	0.0604573	0.259653	0.120806	0.10023	0.191232	1.97487	0.127807	0.754015	protein_coding	NOVEL	UNC5CL
11542	ENSG00000172183	390.457	2.50146	5.66259	0.777207	3.21853	0.0012885	0.020303	0.656404	0.274416	0.768406	0.240058	3.96045	0.604829	3.66908	protein_coding	KNOWN	ISG20
10689	ENSG00000167656	21.8455	2.49924	5.65386	1.54436	1.61829	0.105599	0.38571	0.3721	0.0406578	0	0.101621	1.52005	0.645206	0.0190324	protein_coding	KNOWN	LY6D
2819	ENSG00000105357	6635.33	2.49913	5.65346	0.519002	4.81527	1.47002e-06	7.50043e-05	9.32401	3.79295	6.58154	4.82772	45.9271	18.0337	40.0315	protein_coding	KNOWN	MYH14
18997	ENSG00000233836	242.517	2.49851	5.651	2.41009	1.03669	0.299882	0.637863	0	0.00651817	2.74508	0	0.0172017	8.00611	3.63403	pseudogene	KNOWN	RP11-255H23.2
10200	ENSG00000165272	1197.55	2.49777	5.64812	1.10606	2.25827	0.0239291	0.162633	7.36513	0.301906	4.97031	2.35001	9.21945	49.9786	4.28017	protein_coding	KNOWN	AQP3
11645	ENSG00000172828	724.537	2.49741	5.64673	0.910235	2.7437	0.00607506	0.0639803	2.03854	0.426488	1.43307	1.48383	2.88696	18.1067	1.79081	protein_coding	KNOWN	CES3
7989	ENSG00000147223	4.43886	2.49414	5.63392	2.1088	1.18273	0.236917	0.570193	0.110365	0	0	0.0265239	0	0.280674	0.298058	protein_coding	KNOWN	RIPPLY1
17522	ENSG00000227401	3.9019	2.489	5.6139	1.37785	1.80644	0.0708489	0.310842	0.184978	0	0.221353	0.111139	1.46684	0.235213	0.416301	pseudogene	KNOWN	RPL37P1
7586	ENSG00000143847	117.303	2.48715	5.6067	1.40315	1.77255	0.0763032	0.323596	0.227302	0.0910664	0	0.126813	1.4763	0.061935	0.334945	protein_coding	KNOWN	PPFIA4
739	ENSG00000059377	128.378	2.48522	5.5992	0.887012	2.80179	0.00508197	0.0563637	0.160991	0.322497	0.106464	0.17309	0.134381	2.16922	0.905791	protein_coding	KNOWN	TBXAS1
6735	ENSG00000137752	52.6755	2.48289	5.59017	0.881222	2.81755	0.00483909	0.054479	0.0994419	0.170745	0.144496	0.110958	0.0751005	0.885132	1.24688	protein_coding	KNOWN	CASP1
14985	ENSG00000202358	3.58041	2.4785	5.57318	1.17663	2.10644	0.0351661	0.205461	0.245485	0.393405	0.293758	0.294985	3.11464	1.2486	0.828712	snRNA	KNOWN	RNU6-652P
22319	ENSG00000256725	9.17727	2.47809	5.57158	2.65504	0.93335	0.350639	0.681151	0	1.30525	0	0	0	4.48788	1.03107	lincRNA	NOVEL	RP11-662M24.2
7289	ENSG00000141576	666.192	2.47735	5.56873	1.46261	1.69378	0.090307	0.35444	0.212101	2.80557	0.0483447	0.0970933	3.41012	0.196925	9.61126	protein_coding	KNOWN	RNF157
12451	ENSG00000178403	3.81181	2.47331	5.55317	2.31448	1.06862	0.285239	0.623509	0.0344559	0	0	0.0276025	0.0121435	0	0.245558	protein_coding	KNOWN	NEUROG2
17002	ENSG00000225138	397.959	2.47242	5.54976	0.708812	3.48812	0.000486422	0.00965168	1.12956	1.21332	0.204579	0.887767	2.18846	5.84361	6.27974	processed_transcript	NOVEL	CTD-2228K2.7
4262	ENSG00000117152	81.8348	2.46954	5.53866	1.5724	1.57055	0.116287	0.405312	0.222693	0.00435219	0.292482	0.110955	2.45792	0.151945	0.00611195	protein_coding	KNOWN	RGS4
13740	ENSG00000186847	9.92287	2.46789	5.53235	1.57344	1.56847	0.116772	0.40611	0.0345465	0.110726	0	0.0138375	0.584421	0.0780948	0.0129581	protein_coding	KNOWN	KRT14
2329	ENSG00000101445	5.21209	2.46767	5.5315	2.33134	1.05848	0.289837	0.628652	0.0123126	0.00328862	0	0.0147953	0.125843	0	0	protein_coding	KNOWN	PPP1R16B
18428	ENSG00000231384	4.87652	2.46466	5.51998	1.12206	2.19655	0.0280528	0.180082	0	0.164753	0.123022	0.0617679	0.597835	0.305024	0.578422	pseudogene	KNOWN	AC007919.19
25548	ENSG00000277481	9.07486	2.46464	5.51989	0.802093	3.07276	0.00212089	0.0298329	0.0151686	0.0243086	0.0121009	0.0121515	0.0748432	0.0600067	0.13655	NA	NA	NA
25931	ENSG00000279811	2.93122	2.4643	5.51859	1.5277	1.61308	0.106728	0.387994	0.01971	0	0	0.0078948	0.0277861	0.0556948	0.0295722	NA	NA	NA
4530	ENSG00000119866	298.542	2.46346	5.51539	1.28976	1.91002	0.0561305	0.270998	0.285407	0.100524	0.912	0.0339189	3.04416	0.0558331	2.40694	protein_coding	KNOWN	BCL11A
24380	ENSG00000269881	10.4726	2.46225	5.51075	1.38853	1.77327	0.0761835	0.323478	0	0.00938768	0.140197	0.0281565	0.235357	0.41713	0.0659174	protein_coding	PUTATIVE	ITFG3
16921	ENSG00000224809	3.61645	2.46157	5.50817	1.46124	1.68457	0.092071	0.358498	0	0.0186754	0.0418351	0	0.0369639	0.118545	0.0917931	pseudogene	KNOWN	BEND3P2
25564	ENSG00000277639	110.602	2.45931	5.49954	0.853999	2.87976	0.00397979	0.0474494	0.96696	0.106138	0.475523	0.541178	3.31922	0.819705	4.47162	NA	NA	NA
10710	ENSG00000167723	85.1994	2.45844	5.49623	1.34074	1.83365	0.0667057	0.300228	0.136974	0.0538016	0.0160696	0.119412	1.24946	0.0865172	0.00906668	protein_coding	KNOWN	TRPV3
3729	ENSG00000112699	3797.69	2.45321	5.47632	0.534143	4.59279	4.37354e-06	0.000191782	6.06018	13.1643	7.49287	6.42415	21.2034	55.0306	59.9045	protein_coding	KNOWN	GMDS
13042	ENSG00000182866	234.011	2.45255	5.47382	1.58345	1.54886	0.121415	0.413338	0.361868	2.23142	0	0.0378118	4.30847	5.40831	1.09767	protein_coding	KNOWN	LCK
18770	ENSG00000232818	2.92829	2.45025	5.46509	2.20555	1.11095	0.266591	0.602685	0	0.117977	0	0	0.0311347	0.0499255	0.430769	pseudogene	KNOWN	RPS2P32
2961	ENSG00000106031	1525.77	2.44983	5.4635	0.377281	6.49336	8.39408e-11	1.21685e-08	3.23817	1.88291	3.51649	2.65614	11.407	15.599	19.2536	protein_coding	KNOWN	HOXA13
14993	ENSG00000202512	3.10104	2.44854	5.45864	1.71694	1.42611	0.153836	0.464172	0.0784086	0.251309	0	0	0.497412	0.066468	0.88231	misc_RNA	KNOWN	RN7SKP230
17529	ENSG00000227437	21.1436	2.44725	5.45376	1.06582	2.29612	0.0216689	0.152574	0.0837859	0.335681	0.150393	0.704765	3.94214	0.781291	0.47141	pseudogene	KNOWN	RP11-179H18.5
19486	ENSG00000235863	103.58	2.44721	5.4536	0.574676	4.25841	2.05882e-05	0.00072586	0.390212	0.384138	0.333532	0.549278	3.33596	0.869501	2.57184	protein_coding	KNOWN	B3GALT4
21649	ENSG00000252826	3.99922	2.44595	5.44884	2.67345	0.914903	0.360243	0.690451	0	1.09133	0	0	3.49724	0	1.09472	snRNA	KNOWN	RNU1-92P
25095	ENSG00000273295	28.8881	2.44543	5.44688	1.54528	1.58252	0.113532	0.400843	0	0.153084	0.0390322	0	0.197071	0.331809	0.262173	lincRNA	NOVEL	AP000350.5
22610	ENSG00000258527	9.62518	2.44526	5.44624	1.31936	1.85337	0.0638298	0.292764	0.0331234	0.371577	0	0.0398025	1.01563	0.421188	0.447274	pseudogene	KNOWN	ASB9P1
21669	ENSG00000253161	56.7719	2.4446	5.44373	1.95032	1.25343	0.210049	0.537142	0	1.38286	0.0206518	0	4.05087	0.555938	1.14579	lincRNA	NOVEL	RP11-150O12.1
21695	ENSG00000253299	4.39607	2.4438	5.44071	1.91147	1.27849	0.201076	0.526378	0	0.166381	0.248475	0.249513	0	2.55232	0.116828	pseudogene	KNOWN	RP11-316J7.4
15056	ENSG00000203799	91.4098	2.44139	5.43166	0.769597	3.1723	0.00151236	0.0230778	0.0944474	0.170278	0.0470916	0.0315256	0.654638	0.177921	0.575678	pseudogene	KNOWN	CCDC162P
13421	ENSG00000185040	3.17957	2.43978	5.42561	1.69051	1.44323	0.148956	0.457305	0	0.0233145	0	0.0087409	0.0999829	0.0123328	0.0245561	pseudogene	KNOWN	AC004980.11
11559	ENSG00000172296	269.578	2.43845	5.42057	0.6842	3.56394	0.000365332	0.00771486	0.225057	0.513828	0.243488	0.214868	0.847508	3.20673	0.818726	protein_coding	KNOWN	SPTLC3
11812	ENSG00000173905	5216.42	2.43708	5.41544	0.671974	3.62674	0.000287018	0.00634375	5.89549	19.865	7.96794	8.81629	48.05	100.725	24.0364	protein_coding	KNOWN	GOLIM4
21054	ENSG00000248690	33.5502	2.43695	5.41496	1.0844	2.24729	0.0246216	0.165695	0.073126	0.316411	0	0.316337	1.31438	0.954645	0.608922	antisense	KNOWN	HAS2-AS1
25606	ENSG00000278090	4.86943	2.43605	5.41157	1.76076	1.38352	0.166505	0.481479	0.0104399	0.025096	0	0.0376352	0.253879	0.0442504	0	NA	NA	NA
26064	ENSG00000280384	8.10552	2.43144	5.39433	0.861159	2.82345	0.00475092	0.0537566	0.0256889	0.020584	0.0768511	0.0308689	0.135805	0.195991	0.274616	NA	NA	NA
23832	ENSG00000265933	86.5764	2.42975	5.38799	2.0595	1.17978	0.238089	0.571488	0.00539804	0.67043	0	0	0.559325	0.13728	2.04095	lincRNA	NOVEL	LINC00668
18564	ENSG00000231980	26.0792	2.42941	5.38672	1.92093	1.2647	0.205979	0.532634	0	0.204625	0.0698491	0	0.0848594	0.0123704	1.01809	antisense	NOVEL	AC011899.10
1511	ENSG00000084764	364.031	2.42642	5.37556	1.1012	2.20342	0.0275651	0.178438	1.4656	1.42383	0.227176	0.894251	13.023	0.302555	2.85405	protein_coding	KNOWN	MAPRE3
9666	ENSG00000163154	6.07907	2.42495	5.37012	0.96084	2.52378	0.0116099	0.0995528	0.0222979	0.0893343	0.0533652	0.0267941	0.377211	0.17012	0.250912	protein_coding	KNOWN	TNFAIP8L2
8182	ENSG00000149256	3.73543	2.42472	5.36926	1.47511	1.64376	0.100227	0.375957	0	0.00644433	0	0.00193285	0.0119048	0.0163626	0.00724002	protein_coding	KNOWN	TENM4
5954	ENSG00000132669	1201.57	2.42205	5.35934	1.71896	1.40903	0.158827	0.470506	0.348284	8.40137	0	0.337309	8.25526	4.6402	23.6377	protein_coding	KNOWN	RIN2
16649	ENSG00000223572	92.2157	2.41931	5.34914	1.24009	1.95091	0.0510677	0.257101	0.785725	0.155704	0	0.192893	1.86696	0.759176	1.92993	protein_coding	KNOWN	CKMT1A
2613	ENSG00000103811	2434.37	2.41853	5.34627	0.76306	3.16952	0.00152691	0.0232566	6.83866	1.01807	6.23627	1.73031	29.8697	13.9224	19.6497	protein_coding	KNOWN	CTSH
17315	ENSG00000226491	3.44434	2.41712	5.34102	2.87759	0.839979	0.40092	0.724573	0.152537	0	0	0	0.580603	0	0.0343291	pseudogene	KNOWN	FTOP1
12485	ENSG00000178685	717.441	2.41465	5.33191	1.1753	2.0545	0.0399275	0.221933	0.522464	3.7573	0.182351	0.0994041	2.90013	9.88036	5.4725	protein_coding	KNOWN	PARP10
295	ENSG00000012817	642.895	2.41077	5.3176	0.724375	3.32808	0.000874478	0.014997	0.530167	1.00977	0.528131	0.543679	4.84832	0.672968	4.90072	protein_coding	KNOWN	KDM5D
24309	ENSG00000269242	4.0105	2.41017	5.31538	1.86958	1.28915	0.197345	0.521709	0.0313447	0.0753479	0.0750169	0	0.066282	0	0.670155	protein_coding	NOVEL	CTD-2192J16.22
23157	ENSG00000260704	43.2386	2.40703	5.30381	0.906461	2.65541	0.0079211	0.0768718	0.0854207	0.570384	0.153327	0.0855377	0.662317	0.760329	2.17876	lincRNA	KNOWN	LINC00543
25325	ENSG00000275278	3.82188	2.40657	5.30211	1.33517	1.80244	0.0714763	0.312223	0.0482847	0	0.0577796	0.174063	0.306311	0.163726	0.597668	NA	NA	NA
17173	ENSG00000225855	84.3527	2.40621	5.30081	0.432029	5.56956	2.55384e-08	2.11909e-06	0.156884	0.257403	0.259252	0.251358	1.59556	0.829621	1.25257	antisense	KNOWN	RUSC1-AS1
23928	ENSG00000266835	7.99297	2.4039	5.29231	0.99582	2.41399	0.015779	0.123761	0.149954	0.0801034	0.0299068	0.0300318	0.343519	0.656775	0.168739	lincRNA	NOVEL	RP11-838N2.4
23508	ENSG00000262580	32.9734	2.40329	5.29006	1.02055	2.3549	0.0185278	0.137499	0.11795	0.00821834	0.0122734	0.110922	0.525947	0.217364	0.242368	antisense	NOVEL	RP11-334C17.5
11767	ENSG00000173578	2.95315	2.40174	5.2844	2.08211	1.15351	0.2487	0.583844	0.00486154	0.0155818	0	0	0.0308408	0.0535755	0	protein_coding	KNOWN	XCR1
20906	ENSG00000247381	7.38286	2.39999	5.278	1.81443	1.32272	0.185927	0.506241	0.0177839	0.170999	0	0	0.0188031	0.21106	0.540318	antisense	NOVEL	PDX1-AS1
10736	ENSG00000167800	7.53448	2.39937	5.27574	1.10424	2.17287	0.0297898	0.186947	0.0339365	0.108771	0.0406099	0	0.161466	0.417143	0.171845	protein_coding	KNOWN	TBX10
25441	ENSG00000276362	2.89978	2.39589	5.26301	1.64296	1.45827	0.144765	0.450453	0	0.0480529	0.215288	0	0.126814	0.610049	0.26993	NA	NA	NA
25791	ENSG00000279232	2.83799	2.39356	5.25452	1.70652	1.4026	0.160736	0.473034	0.00903884	0.00724266	0.0216325	0	0.00955684	0.00766235	0.132225	NA	NA	NA
18683	ENSG00000232527	10.2484	2.39215	5.24938	1.16064	2.06105	0.0392982	0.220256	0	0.175393	0.261934	0.0375755	0.330621	1.00731	0.52781	lincRNA	NOVEL	RP11-14N7.2
11819	ENSG00000173930	5.99225	2.39204	5.249	1.91423	1.24961	0.211442	0.539083	0.0196977	0.0118376	0	0.0118348	0.166612	0	0.00554132	protein_coding	KNOWN	SLCO4C1
18302	ENSG00000230825	5.25752	2.39186	5.24835	1.18088	2.02548	0.0428176	0.230382	0.0424687	0.0680588	0.0508199	0	0.426573	0.108004	0.119472	processed_transcript	NOVEL	AC005532.5
616	ENSG00000049540	12.7033	2.39075	5.2443	1.20393	1.9858	0.047056	0.243675	0.0481814	0.00321724	0.00960932	0.0144742	0.212261	0.0170183	0.0677714	protein_coding	KNOWN	ELN
335	ENSG00000015520	18.8366	2.3898	5.24084	0.839817	2.84562	0.00443256	0.0511087	0.065017	0.0320597	0.0119696	0.0300489	0.0846068	0.334935	0.12944	protein_coding	KNOWN	NPC1L1
22887	ENSG00000259641	4.02125	2.38826	5.23525	2.35089	1.0159	0.309678	0.646768	0.00928158	0.044623	0	0	0.00981349	0	0.208886	lincRNA	NOVEL	RP11-279F6.3
7845	ENSG00000145945	207.818	2.38549	5.22522	1.7812	1.33926	0.180485	0.499885	0.0407871	4.11792	0	0.0326743	6.15243	6.97278	3.31985	protein_coding	KNOWN	FAM50B
24273	ENSG00000268879	32.768	2.38471	5.2224	2.06642	1.15403	0.248487	0.583707	0	3.4494	0	0.0876761	5.24586	8.59745	0.0821038	pseudogene	KNOWN	IGFL1P1
23495	ENSG00000262362	4.96991	2.38361	5.21841	1.48583	1.60423	0.108663	0.391972	0	0.207702	0.103395	0	0.137034	0.439476	0.680598	sense_overlapping	NOVEL	LA16c-380H5.2
17708	ENSG00000228203	5.04764	2.38289	5.21582	1.43286	1.66304	0.0963051	0.367846	0.0226049	0	0.013525	0.00679075	0.101576	0.0574874	0.00635916	processed_transcript	NOVEL	RNF144A-AS1
10484	ENSG00000166689	938.701	2.37835	5.1994	1.26897	1.87424	0.0608978	0.284087	0.882177	1.97694	0.00286084	0.48263	3.16725	3.94994	5.92923	protein_coding	KNOWN	PLEKHA7
11119	ENSG00000169860	466.936	2.37798	5.19807	1.02742	2.31452	0.0206391	0.147514	0.615113	0.0311949	1.6352	0.430389	4.45376	4.25402	1.85747	protein_coding	KNOWN	P2RY1
7076	ENSG00000139988	23.8063	2.37777	5.19734	1.59703	1.48888	0.13652	0.437462	0.0334468	0.160802	0.0133413	0.187558	1.50884	0.0094511	0.0250912	protein_coding	KNOWN	RDH12
22906	ENSG00000259704	3.0542	2.37677	5.19374	1.84429	1.28872	0.197494	0.521768	0	0.209425	0	0.0785159	0.96719	0.05539	0.147052	sense_overlapping	NOVEL	CTD-3094K11.1
11916	ENSG00000174697	3.0449	2.37654	5.19288	1.93408	1.22877	0.219159	0.548298	0	0.0246166	0	0.00922907	0.121808	0.00651076	0.00864251	protein_coding	KNOWN	LEP
10418	ENSG00000166347	1504.79	2.37478	5.18658	0.355647	6.67736	2.43284e-11	3.91862e-09	1.50612	1.54356	1.72804	1.56241	5.20971	11.0987	8.35021	protein_coding	KNOWN	CYB5A
13392	ENSG00000184925	27.9914	2.37288	5.17975	0.804109	2.95095	0.00316803	0.040223	0.046589	0.194121	0.100351	0.0447867	0.896512	0.308054	0.314552	protein_coding	KNOWN	LCN12
22456	ENSG00000257660	30.66	2.37215	5.17713	0.656944	3.61089	0.000305148	0.00666672	1.0905	0.341922	0.397156	0.341842	1.85482	3.49677	3.09446	lincRNA	NOVEL	RP11-579D7.4
16991	ENSG00000225083	12.9086	2.36554	5.15344	0.722412	3.2745	0.0010585	0.0173326	0.111584	0.0357641	0.186937	0.107267	0.637085	0.472956	0.552474	antisense	NOVEL	GRTP1-AS1
14918	ENSG00000200114	4.40532	2.36441	5.14941	1.29008	1.83276	0.0668378	0.300575	0.44146	0	0.52827	0.530477	3.73407	1.1227	0.745144	rRNA	KNOWN	RNA5SP123
12470	ENSG00000178538	147.731	2.36079	5.13652	1.364	1.73079	0.0834899	0.339581	0.563218	0.374867	0	0.0709535	0.32176	2.02145	1.54866	protein_coding	KNOWN	CA8
16311	ENSG00000217044	6.33055	2.35955	5.1321	2.66246	0.886227	0.375495	0.703329	0	0	0	0.320035	0	0.395101	0.82416	pseudogene	KNOWN	RP11-331O9.4
11935	ENSG00000174827	17.2271	2.35845	5.12817	0.954804	2.47008	0.0135081	0.110449	0.0423659	0.0678941	0.101394	0.0636359	0.0671907	0.215485	0.774689	protein_coding	KNOWN	PDZK1
12139	ENSG00000176177	2.72926	2.35621	5.12023	2.87321	0.820061	0.412181	0.73241	0	0.0343011	0	0	0.126731	0	0.00963409	protein_coding	KNOWN	ENTHD1
18713	ENSG00000232637	23.197	2.35572	5.1185	0.666048	3.53687	0.000404903	0.00836603	0.011916	0.0286443	0.0665431	0.0334105	0.209982	0.148153	0.174314	pseudogene	KNOWN	WI2-3658N16.1
7153	ENSG00000140563	1387.88	2.35567	5.11832	0.520487	4.52589	6.01406e-06	0.000251204	1.40867	0.458957	1.24004	1.13334	4.71643	3.87241	7.68656	protein_coding	KNOWN	MCTP2
17601	ENSG00000227755	32.3364	2.3547	5.11488	0.838375	2.80865	0.00497501	0.0555272	0.363441	0.608912	0.237223	0.397024	3.52829	2.2967	0.371791	pseudogene	KNOWN	AP000344.4
17965	ENSG00000229312	4.39973	2.35458	5.11445	1.93732	1.21538	0.224223	0.554249	0	0.380944	0	0	0.942495	0.251887	0.33436	antisense	KNOWN	RP11-470P21.2
25499	ENSG00000276997	4.0327	2.35426	5.11332	1.18442	1.98769	0.0468461	0.24315	0.0330817	0.0265078	0.0197935	0.0198762	0.192377	0.0280438	0.167517	NA	NA	NA
16040	ENSG00000214376	22.0078	2.35132	5.10292	0.921579	2.55141	0.0107289	0.0944971	0.040946	0.0328093	0.0734967	0.0820042	0.389633	0.439666	0.0383962	protein_coding	KNOWN	VSTM5
25063	ENSG00000273151	66.2964	2.34869	5.0936	0.818789	2.86849	0.00412438	0.0485393	0.0466414	0.252267	0.051162	0.0373642	0.484924	0.349257	0.660427	antisense	NOVEL	RP11-449P15.2
6302	ENSG00000135253	34.123	2.34795	5.09102	0.684293	3.43121	0.00060089	0.0112954	0.0508925	0.0407792	0.015225	0.0573324	0.353122	0.153694	0.121694	processed_transcript	KNOWN	KCP
14475	ENSG00000197406	90.3311	2.3474	5.08905	1.30957	1.7925	0.0730535	0.316637	0.412372	0.921189	0	0.375397	1.92899	4.26904	0.337477	protein_coding	KNOWN	DIO3
3529	ENSG00000111266	3451.27	2.3455	5.08237	0.42078	5.57418	2.48696e-08	2.07056e-06	6.60802	6.60022	5.4144	5.41497	38.4318	15.7626	37.4424	protein_coding	KNOWN	DUSP16
226	ENSG00000010030	90.922	2.34501	5.08062	1.2973	1.80761	0.070668	0.310214	0.619606	0.851107	0.0264803	0.0265909	0.269065	3.22653	2.32824	protein_coding	KNOWN	ETV7
18986	ENSG00000233799	5.24624	2.34477	5.0798	0.947333	2.47513	0.0133188	0.109482	0.0918422	0.294366	0.109902	0.220723	1.06816	0.700703	1.03347	antisense	NOVEL	AC139887.4
25239	ENSG00000274414	8.3537	2.34392	5.07679	1.01855	2.30122	0.0213792	0.151199	0.0449968	0.0180276	0	0.0811051	0.142726	0.17165	0.227851	NA	NA	NA
8804	ENSG00000156006	17.1479	2.34389	5.0767	1.0177	2.30313	0.0212718	0.150933	0.178821	0.191048	0	0.143253	1.13442	0.572671	0.268297	protein_coding	KNOWN	NAT2
18655	ENSG00000232406	21.5461	2.34124	5.06739	1.14297	2.04838	0.0405224	0.223558	0.0184394	0.192077	0.0551634	0.0332363	0.887072	0.0781565	0.186744	antisense	NOVEL	RP11-234K24.3
17178	ENSG00000225889	10.2891	2.34105	5.0667	1.41801	1.65094	0.0987499	0.3731	0.0749564	0.0772216	0.0128137	0	0.452869	0.0181547	0.168693	antisense	NOVEL	AC074289.1
12578	ENSG00000179299	181.756	2.34074	5.06561	1.55337	1.50687	0.131844	0.430438	0.0166668	1.46458	0.00664807	0.0467309	0.66376	1.50706	3.66967	protein_coding	KNOWN	NSUN7
25946	ENSG00000279878	12.8045	2.3397	5.06198	0.8731	2.67976	0.0073674	0.0733881	0.293485	0.164615	0.0351197	0.0705327	1.05503	0.696615	0.429325	NA	NA	NA
23245	ENSG00000261092	19.858	2.33751	5.05429	1.97983	1.18066	0.237739	0.571203	0	1.78282	0	0.0742668	6.07721	0.890671	0.139094	lincRNA	NOVEL	RP11-21B23.2
197	ENSG00000008323	1482.53	2.33685	5.052	1.24084	1.88328	0.0596624	0.281384	7.05383	0.582997	0.0664058	6.23859	27.0681	6.73753	19.018	protein_coding	KNOWN	PLEKHG6
23816	ENSG00000265753	2.93452	2.32795	5.02091	1.87739	1.23999	0.214978	0.542707	0.0884407	0	0.317496	0	1.21562	0.0749723	0.19904	misc_RNA	KNOWN	RN7SL444P
10530	ENSG00000166888	4605.83	2.32685	5.01708	0.228444	10.1856	2.29881e-24	1.82748e-21	6.57572	6.46873	6.77483	5.6008	27.9777	30.5322	37.1472	protein_coding	KNOWN	STAT6
22881	ENSG00000259605	9.88069	2.32663	5.0163	0.691387	3.36516	0.000764998	0.0136415	0.0505132	0.0404753	0.0241785	0.0364193	0.224314	0.171283	0.181892	antisense	NOVEL	AC074212.5
4103	ENSG00000115935	2.72769	2.3255	5.01239	1.69717	1.37022	0.170619	0.487179	0.00287982	0.00230755	0	0.00692104	0.0395832	0.00244127	0.00324059	protein_coding	KNOWN	WIPF1
22785	ENSG00000259276	2.83336	2.32354	5.00559	2.21756	1.04779	0.294734	0.634028	0	0.0370549	0	0.166708	0.635631	0.117606	0	antisense	NOVEL	RP11-815J21.3
23281	ENSG00000261211	53.3242	2.32273	5.00278	0.675967	3.43616	0.000590033	0.0111509	0.276493	0.151919	0.0661728	0.151884	0.55962	1.37284	0.497809	lincRNA	NOVEL	RP1-80N2.3
479	ENSG00000035115	1918.64	2.32202	5.00033	0.86108	2.69664	0.00700424	0.0708589	2.25145	1.48923	0.146392	3.05316	7.62398	7.35911	11.0446	protein_coding	KNOWN	SH3YL1
23318	ENSG00000261366	9.12486	2.3208	4.99611	0.872454	2.66009	0.00781202	0.076185	0.0463261	0.00928006	0.0692947	0.0417505	0.232659	0.255263	0.117291	antisense	NOVEL	MANEA-AS1
9890	ENSG00000163982	45.1718	2.3202	4.99403	2.0432	1.13557	0.256136	0.591974	0	0.925895	0	0.0507995	3.38213	0.226968	0.0634279	protein_coding	KNOWN	OTOP1
10965	ENSG00000168952	849.625	2.31946	4.99147	1.04583	2.21781	0.0265675	0.174548	1.1494	1.92026	1.09488	0.0939038	1.39773	2.22751	12.322	protein_coding	KNOWN	STXBP6
6269	ENSG00000135048	7542.57	2.31707	4.98319	0.753565	3.07481	0.00210636	0.0296793	5.02414	19.6783	3.30486	3.7253	25.9226	47.1778	45.5076	protein_coding	KNOWN	TMEM2
25177	ENSG00000273797	3.17338	2.31587	4.97905	1.64711	1.40602	0.159717	0.471574	0	0.119813	0	0.119785	0.158096	0.0845039	0.673033	NA	NA	NA
8324	ENSG00000151090	207.571	2.31565	4.97829	1.12953	2.05009	0.0403555	0.222883	0.437329	0.050751	0.0144366	0.463901	0.414558	2.20392	0.987622	protein_coding	KNOWN	THRB
23825	ENSG00000265817	16.0365	2.3156	4.97813	0.957608	2.41811	0.0156012	0.122718	0.0511171	0.0175539	0.0524305	0.0614245	0.355163	0.284757	0.0328689	protein_coding	KNOWN	FSBP
2558	ENSG00000103269	59.9679	2.31528	4.97701	0.640424	3.61523	0.000300084	0.00658969	0.278842	0.279288	0.283623	0.452342	1.99004	2.30468	0.517725	protein_coding	KNOWN	RHBDL1
1110	ENSG00000072609	486.26	2.31249	4.96738	1.48189	1.56049	0.118643	0.408987	0.0230048	1.05562	0.0715742	0.0018429	1.39291	0.877566	2.02434	protein_coding	KNOWN	CHFR
1424	ENSG00000081853	10.5617	2.31215	4.96622	1.41741	1.63125	0.102839	0.380648	0.00390644	0	0.0560953	0.00469414	0.0495637	0.0596077	0.127478	protein_coding	KNOWN	PCDHGA2
24859	ENSG00000272347	17.9031	2.30816	4.95251	1.5241	1.51445	0.129913	0.427191	0.0165722	0.358532	0	0.0796553	0.998747	0.0421453	0.671335	lincRNA	NOVEL	RP11-43F13.4
25941	ENSG00000279852	3.12254	2.30482	4.94105	1.70956	1.34819	0.177597	0.496557	0.0219256	0.0175686	0	0.0131734	0.0579553	0.1394	0	NA	NA	NA
21615	ENSG00000251705	19.3081	2.30415	4.93876	1.46052	1.57763	0.114652	0.402604	1.38247	3.73864	0	0	5.66406	4.83424	8.75054	rRNA	KNOWN	RNA5-8SP6
21411	ENSG00000250698	4.86646	2.30326	4.93573	1.28386	1.79402	0.0728104	0.31596	0.03998	0.160176	0.0478418	0.0480417	0.0422712	0.677832	0.404896	antisense	NOVEL	RP11-392B6.1
11965	ENSG00000175003	10.2683	2.30265	4.93363	1.25767	1.83089	0.0671172	0.301274	0.0227222	0.127448	0.0271904	0	0.360366	0.250405	0.0639217	protein_coding	KNOWN	SLC22A1
9488	ENSG00000162391	37.0039	2.3007	4.92697	0.861465	2.67069	0.00756966	0.0746784	0.327517	0.15746	0.0156769	0.251878	1.38515	0.577493	0.825543	protein_coding	KNOWN	FAM151A
22152	ENSG00000255557	2.75786	2.29731	4.91542	1.72728	1.33002	0.183511	0.502941	0	0.0453603	0	0.204074	0.299269	0.527876	0.0637013	lincRNA	NOVEL	RP11-770G2.2
326	ENSG00000014914	678.822	2.29617	4.91152	0.902852	2.54324	0.0109829	0.0959118	2.32037	0.512108	2.17723	1.08625	17.417	3.22629	1.80765	protein_coding	KNOWN	MTMR11
21613	ENSG00000251675	7.96687	2.29496	4.90739	0.975183	2.35336	0.0186046	0.137851	0.0395585	0.25358	0.142012	0.0475352	0.669209	0.838358	0.311599	antisense	NOVEL	CTC-458I2.2
11005	ENSG00000169174	4290.79	2.29037	4.89181	1.3649	1.67804	0.0933383	0.361387	12.2765	2.43811	0.0189312	20.6642	43.5846	29.6473	56.6343	protein_coding	KNOWN	PCSK9
4840	ENSG00000123096	26.2613	2.29031	4.8916	1.38425	1.65455	0.0980158	0.37183	0.0192544	0.132683	0	0.00462739	0.171006	0.107727	0.30333	protein_coding	KNOWN	SSPN
25489	ENSG00000276855	5.15933	2.28914	4.88765	3.53283	0.647962	0.51701	0.805381	0	0.305031	0	0	0	1.12947	0	NA	NA	NA
25733	ENSG00000279029	9.57679	2.2891	4.88751	0.964686	2.37289	0.0176493	0.133349	0.01416	0.124808	0.033889	0.0340306	0.404231	0.204062	0.175273	NA	NA	NA
19823	ENSG00000237476	45.8994	2.28896	4.88702	0.529257	4.32485	1.52638e-05	0.000559763	0.960047	0.553873	0.597393	0.646035	5.11593	2.14855	2.85203	lincRNA	NOVEL	XXbac-B135H6.15
22913	ENSG00000259728	8.43353	2.28867	4.88605	1.45235	1.57583	0.115064	0.403535	0.0612894	0.0420943	0.0104774	0	0.240692	0.00742226	0.177344	pseudogene	KNOWN	LINC00933
21121	ENSG00000249082	4.58411	2.28613	4.87746	1.92708	1.18632	0.235497	0.568594	0	0.074901	0.149144	0	0.757722	0.0264137	0.0350621	lincRNA	NOVEL	CTC-276P9.1
1948	ENSG00000099812	6221.18	2.2847	4.87261	1.07383	2.12761	0.0333691	0.199295	23.4861	26.4048	0.349716	36.2138	123.439	91.3494	101.159	protein_coding	KNOWN	MISP
23387	ENSG00000261633	9.71143	2.28415	4.87077	1.12309	2.03381	0.0419707	0.22839	0.0944852	0.49211	0	0.113537	1.1988	0.760915	0.69109	antisense	NOVEL	RP11-405F3.5
23473	ENSG00000262155	17.6859	2.28413	4.87069	0.918892	2.48574	0.0129283	0.10731	0.056036	0.145927	0.167638	0.0168338	0.740591	0.178134	0.504446	lincRNA	NOVEL	RP11-266L9.5
17836	ENSG00000228697	2.56423	2.27812	4.85046	2.22707	1.02292	0.306344	0.644167	0.0424344	0	0	0	0.123382	0.00899305	0.0238751	lincRNA	NOVEL	RP5-968D22.1
10788	ENSG00000168032	2.48865	2.27608	4.8436	1.38308	1.64566	0.0998348	0.375393	0.00780591	0.0125095	0.00934089	0	0.066026	0.0198515	0.0263513	protein_coding	KNOWN	ENTPD3
3417	ENSG00000110080	1607.78	2.27558	4.84192	1.02998	2.20934	0.0271512	0.17691	2.22371	7.96634	2.99186	1.73192	43.5647	8.98152	1.62185	protein_coding	KNOWN	ST3GAL4
8389	ENSG00000151650	2.33863	2.27428	4.83757	1.79477	1.26717	0.205094	0.531608	0	0.0216907	0.0107977	0	0.00954042	0.0917903	0.0203074	protein_coding	KNOWN	VENTX
19522	ENSG00000236021	5.56445	2.27358	4.83523	1.10821	2.05159	0.0402095	0.222629	0.136098	0	0.108574	0.163541	0.719486	0.307659	0.408392	antisense	NOVEL	RP11-195C7.1
10608	ENSG00000167280	1458.47	2.27306	4.83346	0.501193	4.53529	5.7524e-06	0.000242328	2.22543	2.75492	3.15186	1.66688	11.3644	5.95897	18.2046	protein_coding	KNOWN	ENGASE
23642	ENSG00000263968	15.4178	2.27303	4.83338	0.808121	2.81274	0.00491213	0.0550749	0.798655	0.497737	0.530947	0.319899	4.22212	0.827482	2.79597	misc_RNA	KNOWN	RN7SL381P
23046	ENSG00000260265	55.5277	2.27263	4.83204	1.17939	1.92696	0.0539849	0.265817	1.27139	0.285247	0	0.672212	4.6511	1.4011	2.03153	lincRNA	NOVEL	RP11-44F21.5
14483	ENSG00000197446	6.68523	2.27238	4.83118	1.40657	1.61554	0.106194	0.386865	0.0350927	0.0351489	0	0.0210844	0.287554	0.0297485	0.0197444	protein_coding	KNOWN	CYP2F1
25331	ENSG00000275339	3.10059	2.27218	4.83052	1.41819	1.60217	0.109118	0.392801	0.206015	0.165076	0	0.123778	1.19802	0.523924	0.115911	NA	NA	NA
3406	ENSG00000110042	1590.74	2.2711	4.82691	0.762539	2.97834	0.00289816	0.037492	4.46433	0.925493	3.68571	1.80377	4.03867	13.8801	21.4622	protein_coding	KNOWN	DTX4
22451	ENSG00000257636	11.8674	2.27079	4.82588	1.17812	1.92748	0.05392	0.265708	0.0629524	0.0630532	0.0941644	0.0756463	0.94848	0.066707	0.0531289	antisense	NOVEL	RP11-1103G16.1
11053	ENSG00000169429	130.013	2.2702	4.8239	1.32318	1.71571	0.0862148	0.345701	1.52473	0.0740446	0.0138224	0.763407	1.62432	6.18848	0.779878	protein_coding	KNOWN	IL8
12202	ENSG00000176692	6.14998	2.26973	4.82231	1.89589	1.19718	0.231235	0.563559	0.0212001	0.0679489	0.0126845	0	0	0.350446	0.0238558	protein_coding	KNOWN	FOXC2
16410	ENSG00000219085	3.9083	2.26939	4.8212	1.07168	2.11761	0.0342083	0.202408	0.0300536	0.0481629	0.0359635	0.0722275	0.349535	0.152861	0.169093	pseudogene	KNOWN	NPM1P37
22173	ENSG00000255669	2.73591	2.26759	4.81519	1.76475	1.28494	0.198813	0.523676	0	0.020574	0	0.0925613	0.298626	0.0435323	0.0577857	lincRNA	NOVEL	RP11-885B4.2
22268	ENSG00000256340	17.1008	2.26627	4.81078	1.05976	2.13847	0.0324785	0.19608	0.0382787	0.128823	0.0091612	0.0275984	0.429008	0.0648988	0.258444	pseudogene	KNOWN	ABCC6P1
3676	ENSG00000112280	2.54122	2.26515	4.80704	2.91387	0.777367	0.436942	0.75096	0.0148842	0	0	0	0.00393429	0	0.0502463	protein_coding	KNOWN	COL9A1
18334	ENSG00000230953	7.8633	2.2626	4.79856	0.788178	2.87067	0.00409599	0.0482791	0.750482	0.240539	0.359224	0.541087	2.53917	2.16306	2.02679	pseudogene	KNOWN	RP4-631H13.6
21959	ENSG00000254550	7.80113	2.26098	4.79316	1.04844	2.15652	0.0310433	0.191374	0.106776	0.171115	0.319432	0.0641533	1.29829	0.181031	0.90114	protein_coding	KNOWN	OMP
9762	ENSG00000163565	38.2689	2.26045	4.79141	1.6665	1.35641	0.174969	0.493113	0.163734	0.00795133	0.130621	0	0.110165	0.963184	0.0111664	protein_coding	KNOWN	IFI16
16011	ENSG00000214274	172.155	2.25909	4.7869	0.892639	2.5308	0.0113802	0.098164	2.22258	0.235493	1.53863	1.0374	6.89449	1.37026	9.79734	protein_coding	KNOWN	ANG
5963	ENSG00000132698	3926.95	2.2579	4.78295	1.79568	1.25741	0.208607	0.535934	53.5541	0.012388	0.0370007	43.063	166.96	73.7989	105.999	protein_coding	KNOWN	RAB25
1919	ENSG00000099282	1595.79	2.25766	4.78214	0.492728	4.58195	4.6066e-06	0.000199868	8.38833	3.88967	6.60478	6.34608	47.4835	18.3705	24.62	protein_coding	KNOWN	TSPAN15
11497	ENSG00000171914	2990.55	2.25733	4.78106	0.257986	8.74982	2.13687e-18	9.75206e-16	1.71936	1.78023	1.78986	2.4302	9.11861	8.36052	10.1971	protein_coding	KNOWN	TLN2
20228	ENSG00000240589	2.73983	2.2547	4.77235	2.23552	1.00858	0.313176	0.649439	0.176288	0	0.210954	0	0.18639	0	1.19023	misc_RNA	KNOWN	RN7SL258P
9122	ENSG00000159166	6241.12	2.2538	4.76938	1.41285	1.59521	0.110665	0.396225	27.1042	23.3864	0.00902702	24.6289	43.7958	101.85	123.094	protein_coding	KNOWN	LAD1
8998	ENSG00000157992	1082.51	2.25357	4.7686	1.28214	1.75766	0.0788046	0.329442	19.4334	0.360037	0.291245	12.2609	50.0612	20.9336	44.6837	protein_coding	KNOWN	KRTCAP3
8487	ENSG00000152518	2191.33	2.25218	4.76402	0.45526	4.94702	7.53589e-07	4.15468e-05	7.35558	4.54428	9.30376	3.67215	33.0771	33.0327	22.7598	protein_coding	KNOWN	ZFP36L2
10170	ENSG00000165124	105.854	2.25181	4.76279	1.16651	1.93037	0.0535606	0.264624	0.044426	0.225452	0.00443017	0.0378138	0.761337	0.103566	0.254123	protein_coding	KNOWN	SVEP1
25652	ENSG00000278570	5.44762	2.25157	4.76201	1.39177	1.61778	0.10571	0.385756	0.00809706	0.0324402	0	0.0291893	0.1541	0.0892319	0.0091114	NA	NA	NA
21525	ENSG00000251301	5.48052	2.25128	4.76105	1.28702	1.74922	0.0802525	0.333258	0.0292396	0.0312388	0.0233262	0	0.226712	0.0247868	0.0548374	lincRNA	NOVEL	RP11-81H14.2
8134	ENSG00000148700	9454	2.25088	4.75974	0.529407	4.25171	2.12144e-05	0.000745801	17.7977	15.0622	6.08844	21.7291	91.2266	50.9811	74.4018	protein_coding	KNOWN	ADD3
16356	ENSG00000218052	4.78485	2.25016	4.75735	1.23629	1.82009	0.0687453	0.305263	0.0142858	0.0152626	0	0.00572215	0.0654529	0.0121103	0.0535848	pseudogene	KNOWN	RP11-561C5.5
24543	ENSG00000270631	6.40164	2.24616	4.74419	1.17526	1.91121	0.0559774	0.270548	0.0470733	0	0.22532	0.226261	0.348396	0.718283	0.635643	pseudogene	KNOWN	RP11-710N8.3
1423	ENSG00000081818	7.38841	2.24605	4.74384	2.19962	1.02111	0.307203	0.644616	0	0	0.0821754	0	0.0943891	0.186284	0.00772742	protein_coding	KNOWN	PCDHB4
13313	ENSG00000184441	52.2099	2.24174	4.72968	0.9069	2.47187	0.0134408	0.110045	0.126689	0.217529	0.0505339	0.108739	0.669747	0.0818256	1.04544	antisense	NOVEL	AP001062.7
23973	ENSG00000267026	2.41205	2.24096	4.72713	1.97673	1.13367	0.256932	0.592591	0.00549746	0.00881003	0	0.00660599	0.0697501	0	0.00618614	antisense	NOVEL	RP11-92C4.3
17797	ENSG00000228536	3.84573	2.23692	4.7139	1.61631	1.38397	0.166368	0.481387	0	0.0654316	0.0162861	0	0.0431692	0.196132	0.0612588	lincRNA	NOVEL	RP11-392O17.1
7431	ENSG00000143036	651.875	2.23578	4.71019	0.931561	2.40004	0.0163933	0.126605	4.78828	0.256762	0.766903	3.80653	12.71	8.84773	12.4143	protein_coding	KNOWN	SLC44A3
6350	ENSG00000135480	193.404	2.23484	4.70709	0.87237	2.5618	0.0104132	0.0929032	0.365798	1.11587	0.184307	0.331597	4.67506	1.75719	0.635487	protein_coding	KNOWN	KRT7
20013	ENSG00000238273	63.31	2.23472	4.70671	0.785347	2.84552	0.00443396	0.0511087	0.110746	0.242014	0.349379	0.326643	0.628041	0.460869	2.5377	antisense	NOVEL	AC012360.6
9806	ENSG00000163701	445.937	2.23372	4.70347	0.823831	2.71139	0.0067002	0.0686284	1.99979	0.738181	0.174772	1.12726	5.2741	2.06668	6.91526	protein_coding	KNOWN	IL17RE
9238	ENSG00000160190	1548.91	2.23347	4.70263	0.454984	4.90889	9.1593e-07	4.97184e-05	2.38229	2.26719	3.34894	1.63515	6.66793	11.4536	15.8545	protein_coding	KNOWN	SLC37A1
21163	ENSG00000249306	15.3239	2.23216	4.69838	1.10217	2.02524	0.0428429	0.230382	0	0.0553873	0.0248148	0.0913678	0.270413	0.246107	0.0855608	lincRNA	NOVEL	RP11-267A15.1
375	ENSG00000021355	5906.02	2.23079	4.69393	0.621419	3.58984	0.000330878	0.00712733	35.8177	10.5576	8.88917	25.7486	126.59	69.0673	89.5415	protein_coding	KNOWN	SERPINB1
345	ENSG00000017427	24.764	2.22674	4.68074	1.7844	1.24789	0.21207	0.539847	0.00324804	0.122322	0	0.00390298	0.078986	0.37171	0.00730985	protein_coding	KNOWN	IGF1
25613	ENSG00000278158	4.87542	2.22458	4.67374	1.17147	1.89896	0.0575701	0.27506	0.111774	0	0.401261	0.402937	1.29997	0.758018	1.00621	NA	NA	NA
16792	ENSG00000224269	22.5093	2.22431	4.67287	0.912055	2.43879	0.0147365	0.117835	0.774834	0.31043	0.83448	0.931074	0.573467	6.43701	2.87727	antisense	NOVEL	AP000697.6
23035	ENSG00000260231	622.746	2.2225	4.66702	1.16905	1.90113	0.0572856	0.274125	0.375241	8.25084	2.25836	0.265239	23.4196	4.19139	11.438	antisense	NOVEL	JHDM1D-AS1
23601	ENSG00000263520	40.5995	2.22198	4.66533	2.19506	1.01226	0.311413	0.648441	0	6.23057	0	0	4.51172	2.33118	15.0455	lincRNA	NOVEL	CTD-2535L24.3
22600	ENSG00000258474	53.7313	2.22058	4.66079	1.26132	1.76051	0.0783205	0.328589	0.286548	3.06141	0	0.803432	6.96829	4.12948	3.49315	protein_coding	PUTATIVE	RP11-187E13.1
36	ENSG00000003400	392.002	2.22023	4.65967	0.649789	3.41684	0.00063352	0.011783	1.14429	0.426594	0.339225	0.290792	2.57691	1.48289	3.63729	protein_coding	KNOWN	CASP10
14713	ENSG00000198483	2.37365	2.21827	4.65335	2.34331	0.946638	0.343823	0.675933	0.0234316	0.00625845	0	0	0.0990979	0.00662111	0	protein_coding	KNOWN	ANKRD35
17969	ENSG00000229324	5.73602	2.21795	4.65232	1.666	1.3313	0.183089	0.502668	0.210135	0.112252	0.0838189	0.252507	0	2.19699	0.0788197	pseudogene	KNOWN	RP5-1091N2.3
15358	ENSG00000205482	6.65886	2.21786	4.65203	1.57145	1.41135	0.158142	0.469662	0.0250161	0.180404	0.0299353	0.0300604	0.528994	0	0.422248	pseudogene	KNOWN	AC007000.12
13004	ENSG00000182600	301.801	2.21682	4.64869	0.708486	3.12896	0.00175427	0.0258256	0.326738	0.876491	1.86145	0.426763	5.6025	3.85364	2.70956	protein_coding	KNOWN	C2orf82
21915	ENSG00000254363	8.03319	2.21461	4.64155	1.00711	2.19898	0.0278796	0.179435	0.00427799	0.0205673	0.00511923	0.0257031	0.108556	0.0290121	0.0577669	processed_transcript	NOVEL	CTB-131B5.5
8097	ENSG00000148346	642.023	2.2124	4.63446	1.53522	1.4411	0.149557	0.45802	3.38609	13.711	0.0196696	0.0987591	8.86346	20.8316	30.1678	protein_coding	KNOWN	LCN2
6906	ENSG00000138696	2.39266	2.21066	4.62888	1.58803	1.39208	0.163898	0.478058	0.00416142	0.00666894	0	0.00500054	0.043999	0.00352769	0.00936546	protein_coding	KNOWN	BMPR1B
16285	ENSG00000216516	2.89201	2.20979	4.62609	2.89947	0.762136	0.445979	0.757239	0	0	0	0.581814	0.127982	1.84701	0	pseudogene	KNOWN	RP11-317M22.1
10441	ENSG00000166450	7.66185	2.2082	4.62098	2.12907	1.03717	0.299658	0.637801	0.0018033	0.00144495	0.00215791	0.0173354	0.0781724	0	0	protein_coding	KNOWN	PRTG
790	ENSG00000063176	827.285	2.20783	4.61981	0.496532	4.44651	8.72767e-06	0.000348034	1.34198	1.84237	1.65294	1.0768	3.38775	6.49587	10.6149	protein_coding	KNOWN	SPHK2
11734	ENSG00000173338	47.122	2.20678	4.61642	1.10377	1.99931	0.0455746	0.239267	0.285692	0.107727	0.623413	0.282718	3.82023	0.512863	0.151285	protein_coding	KNOWN	KCNK7
15502	ENSG00000207129	3.8502	2.20618	4.61451	1.17166	1.88295	0.0597075	0.281506	0.44146	0.176867	0.264135	0.530477	2.80056	1.49693	0.496763	rRNA	KNOWN	RNA5SP187
2585	ENSG00000103490	258.869	2.20564	4.61279	1.75819	1.2545	0.209661	0.536949	0.0158139	6.62713	0.0378472	0.0190027	12.7408	4.08872	6.37059	protein_coding	KNOWN	PYCARD
24908	ENSG00000272562	4.55078	2.20433	4.60859	1.02045	2.16014	0.0307615	0.19057	0.107212	0.0429534	0.192441	0.0644151	0.453423	0.318097	0.603212	antisense	NOVEL	RP11-396C23.4
1380	ENSG00000080573	36.7207	2.20355	4.60611	1.4823	1.48658	0.137126	0.43823	0.0350225	0.183968	0.00931321	0.00467606	0.711791	0.0857684	0.0131366	protein_coding	KNOWN	COL5A3
22343	ENSG00000256943	24.1487	2.2023	4.60213	1.18858	1.85288	0.0638991	0.292918	0.346567	0.0694244	0	0.156169	0.396963	1.28533	0.292486	antisense	NOVEL	RP13-895J2.2
14705	ENSG00000198453	7.51048	2.20157	4.5998	2.39707	0.918444	0.358387	0.688554	0	0.00446056	0.0299766	0	0	0.00235952	0.115887	protein_coding	KNOWN	ZNF568
10959	ENSG00000168918	985.028	2.2012	4.59861	1.2861	1.71153	0.0869829	0.347087	0.543269	4.99239	0.195484	0.410863	0.417747	13.0947	7.67791	protein_coding	KNOWN	INPP5D
11155	ENSG00000170006	105.348	2.19864	4.59047	1.07059	2.05367	0.0400079	0.222162	0.0861432	0.0508605	0.0027127	0.253335	0.457796	0.566903	0.326516	protein_coding	KNOWN	TMEM154
13336	ENSG00000184574	321.851	2.19391	4.57543	1.18925	1.84479	0.065068	0.296229	1.4754	1.43415	0.00964766	1.35632	9.58131	3.38991	1.70558	protein_coding	KNOWN	LPAR5
22550	ENSG00000258212	3.30318	2.19268	4.57154	1.32601	1.65359	0.0982103	0.372163	0	0.0138105	0.0618742	0.0207109	0.164009	0.058443	0.096973	pseudogene	KNOWN	RP11-624G19.1
10996	ENSG00000169116	1579.88	2.1903	4.564	1.33257	1.64366	0.100246	0.375957	7.44072	1.68913	0.00624396	4.47681	9.15257	18.2681	19.1765	protein_coding	KNOWN	PARM1
2454	ENSG00000102554	7152.79	2.18974	4.56224	0.541969	4.04034	5.33733e-05	0.00159822	24.1078	23.6531	6.92749	25.0286	103.027	101.347	68.4003	protein_coding	KNOWN	KLF5
23319	ENSG00000261367	3.14267	2.18834	4.55779	1.43132	1.52889	0.126291	0.420524	0.0949977	0.03806	0.113678	0	0.602651	0.0805309	0.160347	antisense	NOVEL	RP11-455F5.4
23160	ENSG00000260711	25.3415	2.18792	4.55648	0.985634	2.21981	0.0264318	0.174103	0.0605315	0.0606285	0	0.0363686	0.200001	0.240531	0.102172	sense_intronic	NOVEL	RP11-747H7.3
22379	ENSG00000257176	13.7825	2.18648	4.55192	1.05483	2.07282	0.0381894	0.216327	0.102714	0	0.0782171	0.0336616	0.296184	0.229554	0.199641	antisense	NOVEL	RP11-996F15.2
7895	ENSG00000146352	17.2302	2.18602	4.5505	1.479	1.47805	0.139396	0.442062	0.00228706	0.0109955	0	0.0522163	0.0096725	0.0736733	0.138972	protein_coding	KNOWN	CLVS2
5224	ENSG00000126217	1437.4	2.18465	4.54616	0.431121	5.06736	4.03362e-07	2.3838e-05	0.764812	0.662839	0.908418	0.365431	3.81286	3.02239	2.37629	protein_coding	KNOWN	MCF2L
8142	ENSG00000148803	337.755	2.18451	4.54573	1.12094	1.94881	0.0513177	0.257752	4.58238	3.93405	0.0244798	2.90069	11.2473	17.6019	10.1747	protein_coding	KNOWN	FUOM
4357	ENSG00000118137	3.83022	2.18326	4.54178	1.35165	1.61525	0.106256	0.386962	0.0368917	0.0147803	0	0.0664959	0.273041	0.0625471	0.0622698	protein_coding	KNOWN	APOA1
18031	ENSG00000229656	6.72406	2.17929	4.52929	1.17186	1.85968	0.0629315	0.290307	0.0660525	0	0.0526942	0.132286	0.488865	0.167981	0.17343	lincRNA	NOVEL	RP11-462L8.1
22108	ENSG00000255308	2.92763	2.17912	4.52878	1.44032	1.51294	0.130295	0.428017	0.10181	0.0815782	0	0.0611694	0.053822	0.560985	0.229127	antisense	NOVEL	RP11-428C19.4
25295	ENSG00000274976	15.505	2.17893	4.52818	0.780441	2.79192	0.00523958	0.0575163	0.184978	0.444659	0.664058	0.29637	3.06407	0.94085	1.38767	NA	NA	NA
13223	ENSG00000183840	175.697	2.17796	4.52514	1.23696	1.76074	0.0782822	0.32854	1.30287	0.0124282	0.0556813	0.894623	2.41889	2.6494	2.61801	protein_coding	KNOWN	GPR39
10661	ENSG00000167554	30.6307	2.17788	4.52488	1.74382	1.24891	0.211697	0.539492	0.00740747	0.332386	0.0177282	0.0178023	0	0.540029	0.741852	protein_coding	KNOWN	ZNF610
22705	ENSG00000258919	18.5486	2.17766	4.52418	1.32854	1.63913	0.101186	0.377535	0.19493	1.17146	0	0.117118	3.40067	0.95016	0.767724	lincRNA	NOVEL	RP11-1029J19.4
4587	ENSG00000120328	21.5943	2.1775	4.52368	1.94133	1.12165	0.262011	0.597595	0	0.0814729	0.16223	0	0.0286681	0.781492	0.0152554	protein_coding	KNOWN	PCDHB12
24881	ENSG00000272449	97.7857	2.17691	4.52183	0.68607	3.17301	0.00150869	0.0230646	0.975777	0.295844	2.20908	0.823944	5.43732	4.4936	4.59979	lincRNA	NOVEL	RP3-395M20.12
17428	ENSG00000227012	3.174	2.17687	4.52171	2.90271	0.749943	0.453289	0.762527	0	0.138105	0	0.0414218	0.619589	0	0	lincRNA	NOVEL	RP1-97J1.2
19908	ENSG00000237862	7.08872	2.17674	4.52132	2.33653	0.931615	0.351536	0.681636	0.0935716	0	0	0.0642512	0.522937	0.0113317	0	lincRNA	NOVEL	RP1-63G5.7
22894	ENSG00000259664	2.40469	2.17552	4.5175	3.58302	0.607176	0.543734	0.819817	0.0608734	0	0	0	0	0.206413	0	lincRNA	NOVEL	CTD-2147F2.2
19466	ENSG00000235772	7.62385	2.17519	4.51646	1.21032	1.79721	0.0723027	0.314699	0	0.146415	0.382652	0.0548929	0.338096	0.542148	1.07949	antisense	NOVEL	AP001625.6
23400	ENSG00000261664	5.84438	2.17214	4.50691	0.943141	2.30309	0.0212737	0.150933	0.04299	0.0172235	0.102887	0.0516586	0.272722	0.163994	0.266065	antisense	NOVEL	RP11-275F13.1
18597	ENSG00000232114	5.41565	2.17182	4.50592	1.9565	1.11006	0.266974	0.603164	0	0.436828	0	0	0.209601	0.75623	0.557686	pseudogene	KNOWN	AC018693.5
6739	ENSG00000137767	871.75	2.17057	4.50201	0.635983	3.41294	0.000642672	0.0119172	4.25306	1.06326	2.67702	4.38494	22.0882	8.40773	11.285	protein_coding	KNOWN	SQRDL
10258	ENSG00000165643	6.7706	2.16671	4.49	1.2991	1.66785	0.0953446	0.365708	0.0264387	0	0.0949132	0.0317699	0.0419308	0.280156	0.178505	protein_coding	KNOWN	SOHLH1
24679	ENSG00000271427	3.94646	2.16669	4.48993	1.34439	1.61165	0.107037	0.388487	0.182726	0.109811	0	0	0.289797	0.425973	0.308425	lincRNA	NOVEL	RP11-188D8.1
20687	ENSG00000244187	1474.54	2.16563	4.48663	0.437714	4.9476	7.5135e-07	4.15163e-05	10.4849	11.0414	14.8339	8.55252	77.3117	34.6732	39.1436	protein_coding	KNOWN	TMEM141
22909	ENSG00000259713	4.22839	2.16496	4.48453	1.19342	1.81407	0.0696663	0.307681	0.157287	0.0840206	0.125477	0	0.720635	0.177779	0.353981	sense_overlapping	NOVEL	RP11-429B14.1
13858	ENSG00000187762	3.18899	2.16315	4.47892	1.6249	1.33125	0.183105	0.502668	0.0847319	0.0678941	0.304181	0	1.25423	0.0718283	0.190693	pseudogene	KNOWN	RP11-527B17.2
22763	ENSG00000259162	4.02205	2.163	4.47846	1.43589	1.50639	0.131968	0.430701	0.0264787	0.0848676	0	0.0636359	0.475934	0.0673391	0.0595915	pseudogene	KNOWN	RP11-203M5.6
9968	ENSG00000164187	1133.98	2.16288	4.47807	0.919218	2.35295	0.018625	0.137919	0.31504	2.63933	2.68746	0.284862	5.13493	4.83624	9.9367	protein_coding	KNOWN	LMBRD2
1918	ENSG00000099260	3.0889	2.16138	4.47343	2.13894	1.01049	0.31226	0.648979	0.0127447	0	0.00381272	0	0.0202126	0.0351126	0	protein_coding	KNOWN	PALMD
10868	ENSG00000168447	8.32396	2.15888	4.46568	1.89195	1.14109	0.253834	0.58903	0.0536332	0	0.00802248	0.032224	0.283534	0	0.030176	protein_coding	KNOWN	SCNN1B
6772	ENSG00000137878	39.2804	2.15865	4.46498	1.28131	1.68472	0.0920424	0.358472	0.106451	0.0121854	0	0.132485	0.42207	0.096686	0.320857	protein_coding	KNOWN	GCOM1
23133	ENSG00000260604	36.7934	2.15676	4.45914	1.46545	1.47174	0.141091	0.444863	0.0186026	0.205702	0.00445214	0	0.255693	0.331163	0.18421	lincRNA	NOVEL	RP1-140K8.5
22252	ENSG00000256234	7.30377	2.15572	4.45592	1.43962	1.49742	0.134284	0.43413	0.150311	0.301104	0	0	0.238388	0.891946	0.422852	antisense	NOVEL	RP11-283G6.4
10688	ENSG00000167653	30.8399	2.15527	4.45453	1.01291	2.12781	0.0333529	0.199295	0.357575	0.0955062	0.106973	0.214839	0.598606	1.88188	0.100592	protein_coding	KNOWN	PSCA
9195	ENSG00000159784	386.696	2.15435	4.45168	1.37157	1.57072	0.116247	0.405312	0.0367655	1.40424	1.12432	0.0932667	0.120936	2.08816	6.66995	protein_coding	KNOWN	FAM131B
13479	ENSG00000185332	72.8383	2.1542	4.45121	1.13074	1.90512	0.056764	0.272848	0.31847	0.2219	0	0.307814	1.25172	0.399088	1.18417	protein_coding	KNOWN	TMEM105
16579	ENSG00000222448	4.78216	2.15373	4.44978	1.33994	1.60733	0.107982	0.390591	0.163657	0.196703	0.195839	0.0983284	1.90339	0.208101	0.0920791	misc_RNA	KNOWN	RN7SKP150
11611	ENSG00000172594	472.482	2.15367	4.4496	0.838295	2.56911	0.0101959	0.0913705	1.38659	1.12001	3.33188	3.06363	11.4328	16.8067	1.44704	protein_coding	KNOWN	SMPDL3A
7714	ENSG00000144820	7.75088	2.15292	4.44728	2.11905	1.01599	0.309636	0.646768	0.0706271	0.00514475	0	0.00771533	0	0.00544287	0.274549	protein_coding	KNOWN	GPR128
6823	ENSG00000138162	2960.5	2.15267	4.44649	0.410877	5.23919	1.61279e-07	1.06557e-05	2.04905	0.925924	1.73974	2.23945	6.71903	7.53294	8.93435	protein_coding	KNOWN	TACC2
15739	ENSG00000213376	9.82375	2.15104	4.44149	1.22089	1.76187	0.0780918	0.328188	0.0523766	0.0419684	0.344719	0	0.664539	0.421804	0.353628	pseudogene	KNOWN	GAPDHP71
19488	ENSG00000235878	13.1143	2.1506	4.44012	0.726208	2.96141	0.00306236	0.0393271	0.0653405	0.261781	0.273662	0.117774	1.00173	0.636985	0.772021	protein_coding	NOVEL	AP001468.1
13689	ENSG00000186480	6409.93	2.15022	4.43895	0.459813	4.67629	2.92111e-06	0.000135826	23.2732	8.63799	24.9907	20.927	92.2036	74.6944	92.1866	protein_coding	KNOWN	INSIG1
19345	ENSG00000235314	33.7431	2.14983	4.43776	1.28439	1.67382	0.0941661	0.363053	0.0388707	0.474982	0.0116286	0.0233544	0.205491	0.700213	0.940412	lincRNA	NOVEL	LINC00957
13419	ENSG00000185033	3191.75	2.14955	4.43688	0.698783	3.07613	0.00209709	0.0295825	8.19574	1.99777	3.96154	6.04147	39.5256	8.80374	18.8752	protein_coding	KNOWN	SEMA4B
9389	ENSG00000161405	34.601	2.1473	4.42999	0.977271	2.19725	0.0280029	0.179882	0.0131229	0.0672971	0.0031407	0.069384	0.1998	0.0978955	0.212643	protein_coding	KNOWN	IKZF3
25302	ENSG00000275024	5.82241	2.14525	4.4237	1.95015	1.10004	0.271313	0.607804	0	0.47297	0	0	0.884133	0.291887	0.442807	NA	NA	NA
4268	ENSG00000117226	375.214	2.14512	4.42328	1.25149	1.71405	0.0865204	0.346419	0.177272	1.37637	2.17252	0.154254	3.39316	9.28603	0.192601	protein_coding	KNOWN	GBP3
22711	ENSG00000258940	15.8895	2.14463	4.42179	0.979888	2.18865	0.0286224	0.18209	0.0773124	0.185847	0.254417	0	0.510894	0.475156	0.739478	antisense	NOVEL	RP11-407N17.5
2942	ENSG00000105963	933.832	2.14458	4.42163	0.552849	3.87914	0.000104826	0.00278978	1.83173	3.01862	1.88766	1.45907	3.7143	10.2492	13.2313	protein_coding	KNOWN	ADAP1
18707	ENSG00000232613	6.19035	2.14138	4.41182	1.10039	1.94602	0.0516528	0.258936	0.0530644	0.297637	0.0634992	0.127529	0.841581	0.179934	0.835966	antisense	NOVEL	AC007386.4
10810	ENSG00000168126	2.30657	2.14046	4.40904	1.39442	1.53503	0.124778	0.418997	0.0279732	0.0448289	0	0.0336138	0.207034	0.0948532	0.062955	pseudogene	KNOWN	OR2W6P
4242	ENSG00000116990	980.435	2.1401	4.40794	0.521974	4.10002	4.13113e-05	0.00129526	2.90528	1.89977	2.75023	1.07227	5.3811	11.6765	11.4657	protein_coding	KNOWN	MYCL
8358	ENSG00000151376	551.46	2.13894	4.4044	1.46636	1.45868	0.144653	0.450218	0.0136878	3.7784	2.58795	0.0246718	6.62827	8.32539	6.2072	protein_coding	KNOWN	ME3
21242	ENSG00000249825	9.27151	2.13575	4.39465	0.956178	2.23363	0.0255074	0.169761	0.0162492	0.0520808	0.00972227	0.0488144	0.249116	0.110198	0.0639968	antisense	NOVEL	CTD-2201I18.1
9520	ENSG00000162545	884.74	2.1354	4.3936	0.60882	3.50745	0.000452421	0.00911649	4.04801	2.56751	2.57226	5.92644	30.0449	8.96632	10.7831	protein_coding	KNOWN	CAMK2N1
4223	ENSG00000116852	736.085	2.13539	4.39354	1.37618	1.55167	0.12074	0.412408	1.08527	1.0463	0	0.574116	1.66404	3.68914	3.56391	protein_coding	KNOWN	KIF21B
16064	ENSG00000214530	3746.49	2.13537	4.39349	0.571373	3.73726	0.000186037	0.00443395	10.4892	3.95669	17.27	8.15971	45.7179	31.3709	54.2907	protein_coding	KNOWN	STARD10
18209	ENSG00000230461	82.8344	2.13506	4.39254	1.33022	1.60504	0.108484	0.391718	0.0127633	0.239312	0.106912	0	0.43723	0.460916	0.287244	antisense	NOVEL	PROX1-AS1
17982	ENSG00000229390	8.68994	2.13256	4.38495	1.31199	1.62544	0.104068	0.383045	0.0646172	0.181218	0.0386619	0.194117	0.10248	1.39681	0.0727119	pseudogene	KNOWN	MICD
23512	ENSG00000262636	2.8567	2.13166	4.38221	2.22025	0.960098	0.337006	0.670151	0.404106	0.0809507	0	0	1.28179	0	0.341047	pseudogene	KNOWN	CTD-3088G3.4
11164	ENSG00000170075	39.6141	2.12955	4.3758	0.677884	3.14146	0.00168105	0.0249697	0.119612	0.0351425	0.04294	0.0718657	0.480575	0.179135	0.224327	protein_coding	KNOWN	GPR37L1
24745	ENSG00000271849	4.08424	2.12808	4.37136	1.08103	1.96858	0.0490015	0.250434	0.0994957	0.119586	0.0595305	0.0597792	0.262994	0.21086	0.671759	lincRNA	NOVEL	CTC-332L22.1
14428	ENSG00000197181	31.3664	2.12706	4.36825	1.16826	1.82071	0.0686511	0.305226	0.0502409	0.175668	0.0054655	0.0109767	0.212481	0.108411	0.483115	protein_coding	KNOWN	PIWIL2
21381	ENSG00000250546	4.14403	2.12505	4.36219	2.80105	0.758663	0.448054	0.758657	0.0219623	0.0293299	0	0	0.170286	0	0	processed_transcript	NOVEL	RP11-8L2.1
22441	ENSG00000257569	19.8095	2.12463	4.36091	2.27253	0.934918	0.34983	0.680644	2.3879	0.395872	0	0	0	0.698018	8.43173	pseudogene	KNOWN	GSTP1P1
11809	ENSG00000173890	1650.38	2.12442	4.36027	0.736801	2.8833	0.00393532	0.0470102	4.9081	1.51551	6.59947	3.61089	21.3555	5.05473	27.9794	protein_coding	KNOWN	GPR160
9756	ENSG00000163536	576.367	2.1241	4.35932	1.23629	1.71813	0.0857738	0.344661	3.01993	1.97589	0.259984	5.45637	6.0644	28.5011	0.452284	protein_coding	KNOWN	SERPINI1
15338	ENSG00000205336	3876.79	2.12408	4.35926	1.31998	1.60918	0.107576	0.389639	4.14373	9.60601	0.00725998	6.3608	18.3908	24.846	22.5393	protein_coding	KNOWN	GPR56
16665	ENSG00000223695	2.60837	2.11845	4.34228	1.61897	1.30852	0.190697	0.513274	0.0515037	0	0.0616315	0.123778	0.599008	0.0873207	0.0579557	lincRNA	NOVEL	RP4-633O19__A.1
4141	ENSG00000116176	12.9586	2.11728	4.33876	1.18598	1.78525	0.0742205	0.318877	0.146508	0.117395	0	0.201201	0.995815	0.425819	0.0942068	protein_coding	KNOWN	TPSG1
21065	ENSG00000248734	9.52298	2.11607	4.3351	1.10341	1.91776	0.0551416	0.268083	0.0262406	0.210261	0.188404	0	0.416166	0.511624	0.472446	antisense	NOVEL	CTD-2260A17.1
9993	ENSG00000164300	7758.06	2.11379	4.32826	0.582517	3.62871	0.000284838	0.00631254	10.6687	10.6995	3.00198	12.256	52.5988	40.0779	26.2218	protein_coding	KNOWN	SERINC5
12690	ENSG00000180205	4.31297	2.11133	4.32091	2.03659	1.0367	0.299876	0.637863	0	0.287442	0	0	0.126429	0.168944	0.672778	protein_coding	KNOWN	WFDC9
13433	ENSG00000185101	624.071	2.11098	4.31985	0.908927	2.3225	0.0202062	0.145518	1.28647	1.9701	0.0810236	1.21026	2.76514	4.50932	7.46673	protein_coding	KNOWN	ANO9
5858	ENSG00000132000	50.2935	2.11097	4.3198	0.730176	2.89104	0.00383972	0.0460916	0.0756244	0.292883	0.052789	0.121165	0.586361	0.817375	0.368758	protein_coding	KNOWN	PODNL1
8402	ENSG00000151715	3223.46	2.11071	4.31905	1.78621	1.18167	0.237335	0.57068	0.147518	47.8237	0.0830713	0.135555	49.6908	79.8206	26.5987	protein_coding	KNOWN	TMEM45B
18981	ENSG00000233774	4.32424	2.1106	4.31872	1.34338	1.57111	0.116157	0.405233	0.162141	0.129921	0	0	0.25715	0.274899	0.456132	pseudogene	KNOWN	MED14P1
24123	ENSG00000267610	4.8459	2.10919	4.31449	1.2416	1.69877	0.0893621	0.352485	0	0.0398872	0.039712	0.0598169	0.298248	0.0562648	0.0933588	antisense	NOVEL	AC007787.2
12163	ENSG00000176387	591.487	2.10756	4.30962	0.362798	5.80918	6.27811e-09	5.95068e-07	2.77993	1.61356	2.79762	2.84472	8.20494	12.3575	11.8384	protein_coding	KNOWN	HSD11B2
21076	ENSG00000248794	16.606	2.1075	4.30945	0.620574	3.39606	0.000683642	0.0124983	0.583708	1.01338	0.465661	0.701409	3.18866	3.87607	1.97049	pseudogene	KNOWN	CTD-2248H3.1
11842	ENSG00000174136	892.691	2.10647	4.30637	0.787484	2.67494	0.00747432	0.0741347	1.50805	1.39452	1.91768	1.2491	1.25726	3.84854	14.4973	protein_coding	KNOWN	RGMB
7151	ENSG00000140548	1468.47	2.10484	4.3015	0.570137	3.69182	0.000222657	0.00511861	2.62882	3.83335	4.15189	2.89033	9.13173	7.38467	27.0543	protein_coding	KNOWN	ZNF710
901	ENSG00000066405	23.3728	2.10466	4.30097	1.30825	1.60877	0.107667	0.389729	0.0812378	0.0542453	0.0729095	0.0650792	0.823144	0.00573886	0.0533252	protein_coding	KNOWN	CLDN18
169	ENSG00000007384	870.919	2.10324	4.29673	0.51213	4.10685	4.01099e-05	0.00126564	1.56083	1.9017	3.51804	1.07267	9.40433	6.4571	10.087	protein_coding	KNOWN	RHBDF1
6449	ENSG00000136011	20.4636	2.10267	4.29503	0.604486	3.47844	0.000504341	0.00989569	0.0226244	0.0203945	0.0135366	0.0441779	0.134555	0.0982922	0.0891049	protein_coding	KNOWN	STAB2
19289	ENSG00000235092	63.2231	2.10231	4.29398	1.17781	1.78493	0.074273	0.318977	0.306022	0.991056	0.0152583	0.0766102	2.72329	0.843111	0.932636	antisense	NOVEL	AC011747.7
7019	ENSG00000139547	15.8012	2.10167	4.29205	0.761241	2.76084	0.00576526	0.0617199	0.0909938	0.0182279	0.0453696	0.054671	0.216469	0.321403	0.127991	protein_coding	KNOWN	RDH16
5047	ENSG00000124772	28.0462	2.10085	4.28962	1.60086	1.31233	0.18941	0.511094	0.00414959	0.176224	0	0.0199453	0.522099	0.0809062	0.0466941	protein_coding	KNOWN	CPNE5
17809	ENSG00000228599	2.40879	2.09903	4.28423	1.4591	1.43858	0.15027	0.459176	0.0354001	0.0283655	0.0423613	0.0425383	0.374288	0.0600183	0.0398347	pseudogene	KNOWN	RP6-11O7.2
3681	ENSG00000112297	2915.51	2.09535	4.27329	1.26639	1.65459	0.098008	0.37183	6.90474	0.517354	0.0393886	5.36097	13.5274	20.2277	7.33949	protein_coding	KNOWN	AIM1
13820	ENSG00000187546	4.22365	2.09107	4.26065	1.55157	1.34772	0.177749	0.496702	0.0292912	0.0234705	0	0	0.0387123	0.117945	0.0164803	protein_coding	KNOWN	AGMO
12614	ENSG00000179593	8.57457	2.08989	4.25715	1.72367	1.21246	0.225336	0.555268	0.0693973	0.0486559	0	0.0104238	0.311841	0.102951	0	protein_coding	KNOWN	ALOX15B
9077	ENSG00000158710	11329.3	2.08985	4.25705	0.597785	3.496	0.000472293	0.00942444	44.1161	89.9857	55.0156	19.3162	288.732	143.19	233.595	protein_coding	KNOWN	TAGLN2
18912	ENSG00000233460	4.42383	2.08882	4.25401	1.5673	1.33275	0.182613	0.502097	0	0.312273	0.279811	0	0.74169	0.132147	1.05249	pseudogene	KNOWN	RPL35AP31
23263	ENSG00000261150	2277.63	2.08861	4.25339	0.796093	2.62358	0.00870117	0.0819693	4.81253	3.58244	0.754747	3.89214	14.8794	22.7597	3.96637	NA	NA	NA
5527	ENSG00000129437	17.1485	2.08847	4.25296	1.7877	1.16824	0.242709	0.576546	0	0.617432	0	0.0544666	1.62943	0.384241	0.153015	protein_coding	KNOWN	KLK14
4245	ENSG00000117009	5.16638	2.08813	4.25197	1.72739	1.20883	0.226727	0.557304	0.0176703	0.0212383	0	0	0.00467073	0.0187242	0.10439	protein_coding	KNOWN	KMO
14208	ENSG00000196335	40.0999	2.08772	4.25075	1.40283	1.48822	0.136693	0.437659	0.0127447	0.272323	0.00508363	0.00510487	0.53002	0.151254	0.267704	protein_coding	KNOWN	STK31
15327	ENSG00000205231	2.41154	2.08696	4.24853	1.94885	1.07087	0.284229	0.622127	0	0.029795	0	0	0.023589	0.0441301	0.0334738	antisense	NOVEL	TTLL10-AS1
21800	ENSG00000253746	11.8562	2.08661	4.24749	1.79398	1.16312	0.244781	0.579042	0	0.873931	0.0543808	0	2.16219	0.231143	0.613648	lincRNA	NOVEL	RP11-527N22.2
5414	ENSG00000128311	2643.68	2.08606	4.24586	0.561326	3.7163	0.000202163	0.00471789	20.5985	22.7314	6.15011	13.0849	78.0546	43.2001	78.0211	protein_coding	KNOWN	TST
11757	ENSG00000173535	209.902	2.08533	4.24372	1.25069	1.66734	0.0954462	0.365844	2.26145	0.384863	0.095793	0.92586	0.370296	10.2215	1.08096	protein_coding	KNOWN	TNFRSF10C
4577	ENSG00000120262	59.4714	2.08285	4.23644	1.26995	1.64011	0.100983	0.377236	0.00484718	0.438887	0.0290017	0.0291229	0.425372	0.632789	0.54544	protein_coding	KNOWN	CCDC170
19205	ENSG00000234724	3.55079	2.08158	4.2327	1.90337	1.09363	0.274117	0.610734	0.0908888	0	0.0217523	0	0.307512	0.0308191	0.0204549	pseudogene	KNOWN	HDAC1P1
26207	ENSG00000283525	12.5776	2.08098	4.23095	2.01626	1.0321	0.302025	0.639992	0.185087	0.0247178	0	0.129738	1.06001	0	0.0173561	NA	NA	NA
25284	ENSG00000274895	18.4009	2.08093	4.2308	1.50129	1.38609	0.165718	0.480586	0	0.224332	0.0957201	0	0.296011	0.457711	0.270033	NA	NA	NA
21635	ENSG00000252412	5.74153	2.08088	4.23065	1.0069	2.06662	0.0387697	0.218586	0	1.10775	0.661728	0.996739	3.21573	2.81265	2.80017	misc_RNA	NOVEL	Y_RNA
15375	ENSG00000205583	5.89449	2.08062	4.22989	1.07079	1.94307	0.0520073	0.260005	0.025196	0.070662	0.0301507	0	0.0932399	0.138834	0.184291	pseudogene	KNOWN	STAG3L1
13460	ENSG00000185247	2.85983	2.08031	4.22897	2.76074	0.753531	0.451131	0.761067	0.0379031	0	0	0	0.0240452	0.096393	0	protein_coding	KNOWN	MAGEA11
11768	ENSG00000173581	136.378	2.08024	4.22878	1.12595	1.84755	0.0646681	0.29529	0.0969615	1.84134	0.150837	0.221375	0.656116	3.78922	2.90228	protein_coding	KNOWN	CCDC106
14031	ENSG00000188747	173.184	2.07945	4.22645	0.68694	3.02712	0.00246899	0.033249	1.51841	1.71839	0.243514	1.26028	5.24659	3.38381	6.42935	protein_coding	KNOWN	NOXA1
7583	ENSG00000143839	34.7574	2.07799	4.22217	1.08491	1.91535	0.0554478	0.268882	0.227222	0.133517	0	0.564282	1.10512	0.963096	0.852289	protein_coding	KNOWN	REN
13775	ENSG00000187105	33.2514	2.07747	4.22067	1.3342	1.55709	0.119448	0.410329	0.0124813	0.245025	0.10455	0	0.310119	0.169289	0.674153	protein_coding	KNOWN	HEATR4
7300	ENSG00000141655	532.311	2.07715	4.21972	1.03407	2.00871	0.0445674	0.236299	1.14128	0.028066	1.09326	0.462981	1.81156	5.14915	1.66197	protein_coding	KNOWN	TNFRSF11A
18935	ENSG00000233554	19.5484	2.07706	4.21946	0.708337	2.9323	0.00336458	0.0417717	0.311588	0.374505	0.074572	0.299534	1.25189	1.50558	0.631118	antisense	NOVEL	RP11-326F20.5
15494	ENSG00000207005	6.92896	2.07649	4.21779	1.15114	1.80385	0.0712552	0.311571	0.640655	0	0.958295	0.38492	3.04817	2.17237	0.90114	snRNA	KNOWN	RNU1-2
25824	ENSG00000279368	49.8124	2.07561	4.21523	0.678305	3.06	0.00221339	0.030748	0.428964	0.38955	0.171106	0.257731	1.02804	2.36365	0.563151	NA	NA	NA
23485	ENSG00000262246	222.034	2.0748	4.21287	0.540623	3.8378	0.000124143	0.00320354	0.182222	0.366225	0.353892	0.262041	0.543252	1.44596	1.69082	protein_coding	KNOWN	CORO7
5653	ENSG00000130545	783.73	2.07446	4.21186	1.00682	2.06041	0.0393598	0.220395	11.731	3.90007	0.197438	6.87971	23.3935	27.6796	20.6642	protein_coding	KNOWN	CRB3
4254	ENSG00000117115	156.725	2.07432	4.21146	1.43046	1.4501	0.147029	0.453945	0.469678	0.316552	0	0.421971	0.983907	2.7387	0.0938486	protein_coding	KNOWN	PADI2
15403	ENSG00000205744	707.231	2.07415	4.21096	0.945577	2.19353	0.0282694	0.180766	2.92732	2.14675	0.0742437	1.85707	6.6553	8.70207	6.77211	protein_coding	KNOWN	DENND1C
22672	ENSG00000258760	8.28321	2.07373	4.20973	2.709	0.765495	0.443977	0.755906	0	0.338863	0	0	0.844592	0	0.23794	lincRNA	NOVEL	CTD-2509G16.5
1859	ENSG00000095203	3092.64	2.07151	4.20325	0.658464	3.14597	0.00165539	0.0246349	3.71717	1.65621	9.53854	3.22484	25.1321	14.122	17.913	protein_coding	KNOWN	EPB41L4B
1187	ENSG00000074964	1682.73	2.06708	4.19039	0.595375	3.4719	0.000516782	0.0100756	3.3199	0.726971	2.81871	3.10506	12.9499	10.7132	7.66443	protein_coding	KNOWN	ARHGEF10L
25059	ENSG00000273142	15.4997	2.06141	4.17394	1.39246	1.48041	0.138765	0.441072	0.0381675	0.159031	0	0.00917274	0.427761	0.0582392	0.171795	lincRNA	NOVEL	RP11-458F8.4
23685	ENSG00000264395	10.821	2.06113	4.17312	1.44212	1.42923	0.152938	0.462795	5.73095	0	0.571493	2.8694	14.1386	13.3601	1.07481	miRNA	KNOWN	MIR3193
22688	ENSG00000258851	5.10479	2.06096	4.17264	1.41867	1.45274	0.146296	0.452659	0	0.30448	0.113678	0	0.401767	0.523451	0.427593	antisense	NOVEL	RP11-894P9.2
22112	ENSG00000255337	4.23933	2.06034	4.17084	1.11947	1.84046	0.0657	0.297506	0.0759158	0.152075	0	0.0456119	0.280932	0.321774	0.298991	antisense	NOVEL	RP11-315O6.1
17081	ENSG00000225489	290.608	2.05923	4.16762	0.565482	3.64154	0.000271013	0.00605516	0.888207	1.91271	0.86358	1.08954	7.92373	2.46276	4.49764	lincRNA	NOVEL	RP11-390F4.3
4388	ENSG00000118503	343.373	2.05907	4.16718	0.911919	2.25795	0.0239485	0.162635	1.00366	0.295852	1.34416	0.518662	7.81866	0.943396	1.11769	protein_coding	KNOWN	TNFAIP3
12685	ENSG00000180178	24.7093	2.05838	4.16519	1.3303	1.54731	0.121789	0.414096	0.0748159	0.0130323	0.00389252	0.0508141	0.165085	0.27575	0.00366036	pseudogene	KNOWN	AC018865.8
20070	ENSG00000239377	6.15594	2.05806	4.16426	1.13415	1.81463	0.0695802	0.30752	0	0.300674	0.299353	0.075151	0.727366	0.424129	0.985246	antisense	NOVEL	RP4-584D14.6
25460	ENSG00000276545	8.4192	2.05793	4.16388	1.20765	1.70408	0.0883658	0.350167	0.0228706	0	0.0821038	0.0687057	0.326447	0.0872447	0.11581	NA	NA	NA
22697	ENSG00000258893	4.84714	2.05653	4.15985	1.87895	1.09451	0.273732	0.610356	0.14183	0	0.0339439	0.0681715	0.0899746	0	0.670308	pseudogene	KNOWN	SETP2
11261	ENSG00000170579	64.8672	2.05642	4.15952	1.58528	1.2972	0.194563	0.518382	0.0433948	0.119962	0	0.0860393	0.0894693	0.684226	0.0048831	protein_coding	KNOWN	DLGAP1
20618	ENSG00000243742	137.989	2.0551	4.15573	0.59458	3.4564	0.00054745	0.0105401	0.638361	0.441511	0.361843	0.201864	1.27884	2.81397	1.03591	pseudogene	KNOWN	RPLP0P2
13316	ENSG00000184454	133.538	2.05273	4.14891	1.53434	1.33786	0.180941	0.500294	0.299501	0.19403	0	1.01842	0.66028	0.113441	3.92951	protein_coding	KNOWN	NCMAP
9490	ENSG00000162398	6.87381	2.05131	4.14482	1.21083	1.69414	0.0902389	0.354398	0.0147816	0.0592211	0.0353766	0.0710487	0.453232	0.0751833	0.0332666	protein_coding	KNOWN	C1orf177
760	ENSG00000060709	167.243	2.05055	4.14262	2.2607	0.90704	0.364386	0.694342	0.0123088	0.902444	0	0	0.0130141	2.41554	0.415521	protein_coding	KNOWN	RIMBP2
13358	ENSG00000184709	17.7147	2.05027	4.14183	1.37714	1.48879	0.136543	0.437462	0.0434522	0.226314	0.415975	0	0.137827	1.62074	0.366717	protein_coding	KNOWN	LRRC26
15367	ENSG00000205542	6834.85	2.05015	4.14149	0.569697	3.59867	0.00031985	0.00692044	56.1387	65.5857	14.8772	50.6866	161.339	177.442	242.995	protein_coding	KNOWN	TMSB4X
3103	ENSG00000107242	726.004	2.05002	4.14111	1.80426	1.13621	0.255868	0.591649	0.00534097	6.57778	0.306779	0.00641794	1.55858	5.05734	14.8087	protein_coding	KNOWN	PIP5K1B
[truncated: 22,646 more rows]
