# Supplementary material for: A small protein encoded by a putative lncRNA regulates apoptosis and tumorigenicity in human colorectal cancer cells
Source: eLife. 2020 Oct 28;9:e53734. doi: 10.7554/eLife.53734 (PMC7673786; doi:10.7554/eLife.53734)
Supplement: Supplementary file 3. [file elife-53734-supp3.xlsx]

## Sheet: Supplementary file 3
Sequences of primers, gRNAs and siRNAs used in this study.
Primer names and sequences
GAPDH FP	TGCACCACCAACTGCTTAGC
GAPDH RP	GGCATGGACTGTGGTCATGAG
SDHA FP	TGGGAACAAGAGGGCATCTG
SDHA RP	CCACCACTGCATCAAATTCATG
FORCP FP	GAGGAGAAGAGACGCAGGTG
FORCP RP	GTATTGCAGCCTCTCGTTCC
FOXA1 FP	GTGAAGATGGAAGGGCATGA
FOXA1 RP	AGGCCTGAGTTCATGTTGCT
TFF1 FP	GTGCAAATAAGGGCTGCTGT
TFF1 RP	GGGACTAATCACCGTGCTG
MALAT1 FP	GACGGAGGTTGAGATGAAGC
MALAT1RP	ATTCGGGGCTCTGTAGTCCT
FORCP-FOXA1_Prom_FP1	TTGCATCAAACGTCCCAGTA
FORCP-FOXA1_Prom_RP1	TGGGCCACATCATACTCTCA
FORCP-FOXA1-Intron_FP1	AAGAAGCGGGGTAGGGACTA
FORCP-FOXA1-Intron_RP1	AGCGGATGAAATCCATGAAG
FORCP FP for CRISPR/Cas9 indel	TCAGGGCACCTGTGTAGATG
FORCP RP for CRISPR/Cas9 indel	TCGCTCATTTGCTCACACCC
BRI3BP-FP	gatttgtgctgggagtggat
BRI3BP RP	gaggctgggctgaaatactg
UBC-FP	gatggtcgtaccctgtctgac
UBC-RP	ggtcttgccagtgagtgtctt
gRNA sequence for Knockout of FORCP	UGUGGGGAAGAUGCCAUCCA
Sequence for FORCP siRNAs, Smartpool	UCAAAGUACUCACGAGGAU
	CUGUAGUUCUUCUUGUGAA
	CCUCCGAUCUUUCAUGGUA
	CUGGGGAGUCUGUGGGGAA
Sequence for FOXA1 siRNAs, Smartpool	GCACUGCAAUACUCGCCUU
	CCUCGGAGCAGCAGCAUAA
	GAACAGCUACUACGCAGAC
	CCUAAACACUUCCUAGCUC
Sequence for BRI3BP siRNAs, Smartpool	GCUCUUGGAUGUUCUUGGA
	GAGUGGAUAUGUUCGUGGA
	GCGUGUACAUCCUGCACAA
	GUGGCCGUCUACUUCAUGA
