# Supplementary material for: A small protein encoded by a putative lncRNA regulates apoptosis and tumorigenicity in human colorectal cancer cells
Source: eLife. 2020 Oct 28;9:e53734. doi: 10.7554/eLife.53734 (PMC7673786; doi:10.7554/eLife.53734)
Supplement: Supplementary file 4. [file elife-53734-supp4.xlsx]

## Sheet: Sheet1
Supplementary file 4. PSM refers to Peptide spectrum matches. The 4 replicates are designated as A-D. Vec refers to empty vector (pLVX). An empty well means that the PSMs in that sample was zero.
Accession	Gene Symbol	Description	# Replicates	# PSMs Vec A	# PSMs FORCP-Flag-A	# PSMs Vec B	# PSMs FORCP-Flag-B	# PSMs Vec C	# PSMs FORCP-Flag-C	# PSMs Vec D	# PSMs FORCP-Flag-D
Q9ULC5	ACSL5	Long-chain-fatty-acid--CoA ligase 5	4		1		2		6		4	1
P25705	ATP5F1A	ATP synthase subunit alpha, mitochondrial	4		6		3		10		9	2
P06576	ATP5F1B	ATP synthase subunit beta, mitochondrial	4		12		5		8		14	3
Q8WY22	BRI3BP	BRI3-binding protein	4		13		9	1	15		23	4
Q96G23	CERS2	Ceramide synthase 2	4		11		6		8		10	5
Q7Z2K6	ERMP1	Endoplasmic reticulum metallopeptidase 1	4		4		2		4		4	6
Q96D05	FAM241B	Uncharacterized protein FAM241B	4		1		2		1		1	7
Q92616	GCN1	eIF-2-alpha kinase activator GCN1	4		2		1		28		6	8
Q06136	KDSR	3-ketodihydrosphingosine reductase	4		11		4		2		8	9
A6NJY4, A0A1B0GVL6	LINC00675	Putative transmembrane protein LOC100289255, HCG1800530, isoform CRA_b	4		6		4		9		5	10
P78527	PRKDC	DNA-dependent protein kinase catalytic subunit	4		4		4		88		28	11
Q00765	REEP5	Receptor expression-enhancing protein 5	4		3		5		3		3	12
P04843	RPN1	Dolichyl-diphosphooligosaccharide--protein glycosyltransferase subunit 1	4		1		2		13		6	13
Q00325	SLC25A3	Phosphate carrier protein, mitochondrial	4		1		1		2		1	14
O15260	SURF4	Surfeit locus protein 4	4		2		2		9		1	15
Q9BVC6	TMEM109	Transmembrane protein 109	4		2		2		2		1	16
P62987, P62979, P0CG47, P0CG48	UBA52, RPS27A, UBB/C	Ubiquitin-60S ribosomal protein L40, Ubiquitin-40S ribosomal protein S27a, Polyubiquitin-B/C	4	2	16	3	8	5	22	3	18	17
P07900, P08238	HSP90AA1, HSP90AB1	Heat shock protein HSP 90-alpha/beta	3				3		1		1
P11021	HSPA5	Endoplasmic reticulum chaperone BiP	3		1		1		3
Q96HR9	REEP6	Receptor expression-enhancing protein 6	3		1		2		1
Q9NQC3	RTN4	Reticulon-4	3		2				3		2
P08195	SLC3A2	4F2 cell-surface antigen heavy chain	3				1		2		2
P68363, Q9BQE3	TUBA1B/C	Tubulin alpha-1B/C chain	3	4	9				9	1	9
Q9BQB6	VKORC1	Vitamin K epoxide reductase complex subunit 1	3		1				2		2
Q9H845	ACAD9	Acyl-CoA dehydrogenase family member 9, mitochondrial	2						4		2
O75915	ARL6IP5	PRA1 family protein 3	2		4		6
P30049	ATP5F1D	ATP synthase subunit delta, mitochondrial	2				1		1
Q9Y3E0	GOLT1B	Vesicle transport protein GOT1B	2						1		1
Q9P035	HACD3	Very-long-chain (3R)-3-hydroxyacyl-CoA dehydratase 3	2						3		2
P0DMV9	HSPA1B	Heat shock 70 kDa protein 1B	2						2		3
P11142	HSPA8	Heat shock cognate 71 kDa protein	2					2	14	2	10
Q14974	KPNB1	Importin subunit beta-1	2		1				1
P35232	PHB	Prohibitin	2						8		1
Q99623	PHB2	Prohibitin-2	2				1		6
Q2PPJ7	RALGAPA2	Ral GTPase-activating protein subunit alpha-2	2		1				1
Q15758	SLC1A5	Neutral amino acid transporter B(0)	2						6		2
Q15043	SLC39A14	Zinc transporter ZIP14	2						2		1
P58511	SMIM11A	Small integral membrane protein 11A	2				3		2
P07437, P68371	TUBB, TUBB4B	Tubulin beta chain, Tubulin beta-4B chain	2						2		1
P33527	ABCC1	Multidrug resistance-associated protein 1	1						1
Q92685	ALG3	Dol-P-Man:Man(5)GlcNAc(2)-PP-Dol alpha-1,3-mannosyltransferase	1						1
P04114	APOB	Apolipoprotein B-100	1						3
O43150	ASAP2	Arf-GAP with SH3 domain, ANK repeat and PH domain-containing protein 2	1		1
P05023	ATP1A1	Sodium/potassium-transporting ATPase subunit alpha-1	1						1
Q93084, P16615	ATP2A2/3	Sarcoplasmic/endoplasmic reticulum calcium ATPase 2/3	1						1
O75964	ATP5MG	ATP synthase subunit g, mitochondrial	1				2
P48047	ATP5PO	ATP synthase subunit O, mitochondrial	1						1
P61769	B2M	Beta-2-microglobulin	1				1
Q8NFC6	BOD1L1	Biorientation of chromosomes in cell division protein 1-like 1	1						2
Q03135	CAV1	Caveolin-1	1						2
Q0VFZ6	CCDC173	Coiled-coil domain-containing protein 173	1		1
Q9HCK8	CHD8	Chromodomain-helicase-DNA-binding protein 8	1						1
Q9P003	CNIH4	Protein cornichon homolog 4	1						1
P02452	COL1A1	Collagen alpha-1(I) chain	1								13
P08123	COL1A2	Collagen alpha-2(I) chain	1								6
P02461	COL3A1	Collagen alpha-1(III) chain	1								1
P50416	CPT1A	Carnitine O-palmitoyltransferase 1, liver isoform	1								1
Q5TAQ9	DCAF8	DDB1- and CUL4-associated factor 8	1						1
P81605	DCD	Dermcidin	1		2
Q16531	DDB1	DNA damage-binding protein 1	1						3
Q9UJV9	DDX41	Probable ATP-dependent RNA helicase DDX41	1						1
Q68D51	DENND2C	DENN domain-containing protein 2C	1								1
Q05639, P68104, Q5VTE0	EEF1A1/2, EEF1A1P5	Elongation factor 1-alpha 1/2, Putative elongation factor 1-alpha-like 3	1				1
O14681	EI24	Etoposide-induced protein 2.4 homolog	1						1
O94919	ENDOD1	Endonuclease domain-containing 1 protein	1						1
Q8TDW7	FAT3	Protocadherin Fat 3	1						1
Q53EU6	GPAT3	Glycerol-3-phosphate acyltransferase 3	1						1
P02100, P02042, P69891, P68871, P69892	HBE1, HBB/D, HBG1/2	Hemoglobin subunit beta/gamma-1/gamma-2/delta/epsilon	1				1
P17096	HMGA1	High mobility group protein HMG-I/HMG-Y	1				1
O60812, P07910, P7ZW38, B2RXH8	HNRNPCL1/2/3, HNRNPC	Heterogeneous nuclear ribonucleoprotein C-like 1/2/3, Heterogeneous nuclear ribonucleoprotein C1/C2	1		1
P48741, P17066	HSPA6/7	Putative heat shock 70 kDa protein 7, Heat shock 70 kDa protein 6	1				1
P10809	HSPD1	60 kDa heat shock protein, mitochondrial	1								1
P01859	IGHG2	Immunoglobulin heavy constant gamma 2	1								2
A2NJV5, A0A075B6S2, A0A0A0MRZ7	IGKV2-29, IGKV2D-26/29	Immunoglobulin kappa variable 2-29, Immunoglobulin kappa variable 2D-26/29	1					70	166
B9A064, P0DOX8	IGLL5	Immunoglobulin lambda-like polypeptide 5, Immunoglobulin lambda-1 light chain	1				3
P01706, P01709, P0DOX8	IGLV2-8/11	Immunoglobulin lambda variable 2-8/11, Immunoglobulin lambda-1 light chain	1		2
Q16891	IMMT	MICOS complex subunit MIC60	1						1
O00410	IPO5	Importin-5	1						1
O15397	IPO8	Importin-8	1						1
P19823	ITIH2	Inter-alpha-trypsin inhibitor heavy chain H2	1				1
O15091	KIAA0391	Mitochondrial ribonuclease P catalytic subunit	1		1
Q9BY89	KIAA1671	Uncharacterized protein KIAA1671	1								1
P09382	LGALS1	Galectin-1	1				1
Q9NVV4	MTPAP	Poly(A) RNA polymerase, mitochondrial	1		2
P20929	NEB	Nebulin	1		1
Q9H361, P11940	PABPC1/3	Polyadenylate-binding protein 1/3	1						1
Q9BYG4	PARD6G	Partitioning defective 6 homolog gamma	1		1
P08559	PDHA1	Pyruvate dehydrogenase E1 component subunit alpha, somatic form, mitochondrial	1						1
P07737	PFN1	Profilin-1	1				1
P12273	PIP	Prolactin-inducible protein	1								1
O14744	PRMT5	Protein arginine N-methyltransferase 5	1						1
P48634	PRRC2A	Protein PRRC2A	1								1
P05388	RPLP0	60S acidic ribosomal protein P0, 60S acidic ribosomal protein P0-like	1								1
P04844	RPN2	Dolichyl-diphosphooligosaccharide--protein glycosyltransferase subunit 2	1						3
P62263	RPS14	40S ribosomal protein S14	1						1
P46782	RPS5	40S ribosomal protein S5	1						1
O15427	SLC16A3	Monocarboxylate transporter 4	1						2
P43003	SLC1A3	Excitatory amino acid transporter 1	1						2
P09486	SPARC	SPARC	1				2
Q9P246	STIM2	Stromal interaction molecule 2	1		1
P46977	STT3A	Dolichyl-diphosphooligosaccharide--protein glycosyltransferase subunit STT3A	1						2
P48775	TDO2	Tryptophan 2,3-dioxygenase	1		1
Q92973	TNPO1	Transportin-1	1						1
Q9Y5L0	TNPO3	Transportin-3	1						1
Q9NS69	TOMM22	Mitochondrial import receptor subunit TOM22 homolog	1								1
Q6IQ55	TTBK2	Tau-tubulin kinase 2	1				1
Q8WZ42	TTN	Titin	1								1
P55072	VCP	Transitional endoplasmic reticulum ATPase	1						3
Q9Y334	VWA7	von Willebrand factor A domain-containing protein 7	1								1
O14980	XPO1	Exportin-1	1						3
